# Supplementary material for: Thiosuccinimide enabled S–N bond formation to access N-sulfenylated sulfonamide derivatives with synthetic diversity
Source: Royal Society of Chemistry journal article supplement (doi:10.1039/d3ob01848b), 2023-12-27
Supplement: d3ob01848b1.pdf [file d3ob01848b1.pdf]

## Electronic Supplementary Information

### **Thiosuccinimide enabled S–N bond formation to access *N*-sulfenylated sulfonamide derivatives with synthetic diversity**

Peifeng Wang,<sup>‡</sup> Shan Li,<sup>‡</sup> Huiling Wen, Yin Lei, Shujuan Huang, Zixiu Wang,\*  
Jialong Su, Wenxiang Guan, and Jian Lei\*

Key Laboratory of Prevention and Treatment of Cardiovascular and Cerebrovascular Disease of the Ministry of Education, Key Laboratory of Biomaterials and Biofabrication in Tissue Engineering of Jiangxi Province, College of Pharmacy, Gannan Medical University, Ganzhou 341000, PR China.

E-mail: zzw0001@gmu.edu.cn, jianleiray@163.com

| <b>Table of Contents</b>           | <b>Page</b> |
|------------------------------------|-------------|
| 1. General information             | S1          |
| 2. Synthesis of starting materials | S1          |
| 3. Analytical data                 | S3          |
| 4. Stability experiment            | S30         |
| 5. References                      | S31         |
| 6. NMR spectra                     | S32         |

## 1. General information

The commercially available starting materials, *e.g.*, sulfa drugs, thiols, *N*-chlorosuccinimide, solvents, and various additives, were purchased from Adamas-beta, Energy chemical, and Heowns, *etc.*, and were used as received unless otherwise noted. The sulfenylating reagents, such as thiosulfonate (**Ts-2a**), thiophthalimide (**Phth-2a**), and thiosuccinimides (**Su-2a–Su-2o**), were prepared according to literature procedures.<sup>1–3</sup> All air- and moisture-sensitive manipulations were conducted with a standard Schlenk technique under nitrogen. Flash column chromatography was performed using Qingdao Haiyang silica gel (300–400) with distilled solvents. Analytical thin layer chromatography (TLC) was performed on Haiyang TLC silica gel GF254 (0.25 mm) plates. Melting points were determined using the XT-4 micro melting point apparatus and were uncorrected. The <sup>1</sup>H, <sup>13</sup>C NMR, and <sup>19</sup>F NMR spectra were recorded on a Bruker ADVANCE III spectrometer operating at 400 MHz, 101 MHz, and 376 MHz, respectively, and chemical shifts are reported in ppm ( $\delta$ ) relative to internal tetramethylsilane (TMS). Data are reported as follows: chemical shift, multiplicity (s = singlet, d = doublet, t = triplet, q = quartet, m = multiplet), and coupling constants (*J*) were reported in hertz. High-resolution mass spectra were measured on a Thermo Fisher Scientific Exactive Orbitrap Mass Spectrometer under Electron Spray Ionization conditions. Single crystal X-ray diffraction analysis was performed on a Bruker D8 Quest diffractometer. High-temperature NMR spectrum of **Su-2a** was measured using a Bruker ADVANCE III HD 400 instrument.

## 2. Synthesis of starting materials

### Synthesis of thiosulfonate **Ts-2a**

Thiosulfonate **Ts-2a** was synthesized following a one-step procedure from 4-methylbenzenethiol **2a**, according to previous literature.<sup>1</sup> To a 100 mL Schlenk tube equipped with a magnetic stir bar, **2a** (5 mmol), sodium *p*-tolylsulfinate (10 mmol), FeCl<sub>3</sub> (1 mmol), and DMF (20 mL) were added under open-flask conditions, and the reaction mixture was vigorously stirred at rt for 3 h. Upon completion, the reaction mixture was washed with saturated NH<sub>4</sub>Cl solution and extracted by dichloromethane. The combined organic layer was dried over anhydrous Na<sub>2</sub>SO<sub>4</sub>, filtered, and

concentrated *in vacuo*. The resulting residue was purified by flash column chromatography on silica gel, eluting with EA/PE, to afford the desired product.

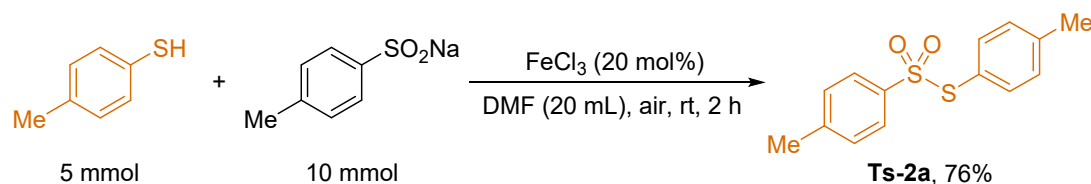

**Fig. S1** Synthetic route for preparing thiophthalimide **Ts-2a**.

### Synthesis of thiophthalimide **Phth-2a**

Thiophthalimide **Phth-2a** was synthesized following a two-step procedure from 4-methylbenzenethiol **2a**, according to previous literature.<sup>2</sup> To a cooled (0 °C) solution of **2a** (10 mmol) and a catalytic amount of Et<sub>3</sub>N (1 mmol) in CH<sub>2</sub>Cl<sub>2</sub> (10 mL), a solution of sulfonyl chloride (10 mmol) in anhydrous CH<sub>2</sub>Cl<sub>2</sub> was added slowly under N<sub>2</sub> with vigorous stirring, and the reaction temperature was maintained at 0 °C for 0.5 h. Then, the reaction mixture was gradually warmed to rt over a period of 2 h, and then added dropwise to a solution of phthalimide (10 mmol) and Et<sub>3</sub>N (12 mmol) in dry CH<sub>2</sub>Cl<sub>2</sub> at 0 °C, followed by stirring at rt for 2 h. Upon completion, the reaction mixture was washed with deionized water and extracted by dichloromethane. The combined organic layer was dried over anhydrous Na<sub>2</sub>SO<sub>4</sub>, filtered, and concentrated *in vacuo*. The resulting residue was purified by flash column chromatography on silica gel, eluting with EA/PE, to afford the desired product.

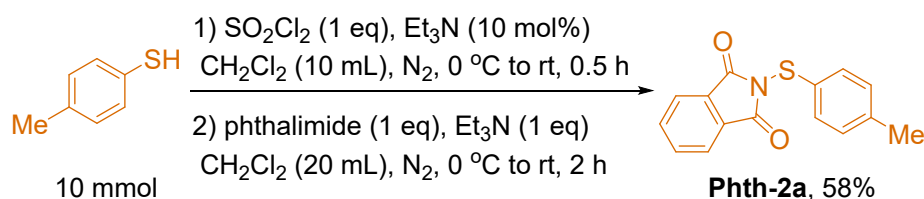

**Fig. S2** Synthetic route for preparing thiophthalimide **Phth-2a**.

### General procedure for the synthesis of thiosuccinimides **Su-2a–Su-2o**

According to previous literature,<sup>3</sup> thiosuccinimides were synthesized following a one-step procedure from the corresponding thiols. To a cooled (0 °C) suspension of NCS (20 mmol) in anhydrous toluene (30 mL), thiol (20 mmol) was added under N<sub>2</sub>. After being stirred at 0 °C for 0.5 h, Et<sub>3</sub>N (20 mmol) in dry toluene was added dropwise, followed by reacting at room temperature for approximately 12 h. Upon completion, the reaction mixture was washed with deionized water and extracted by

dichloromethane. The combined organic layer was dried over anhydrous  $\text{Na}_2\text{SO}_4$ , filtered, and concentrated *in vacuo*. The resulting residue was purified by flash column chromatography on silica gel, eluting with EA/PE, to afford the desired product.

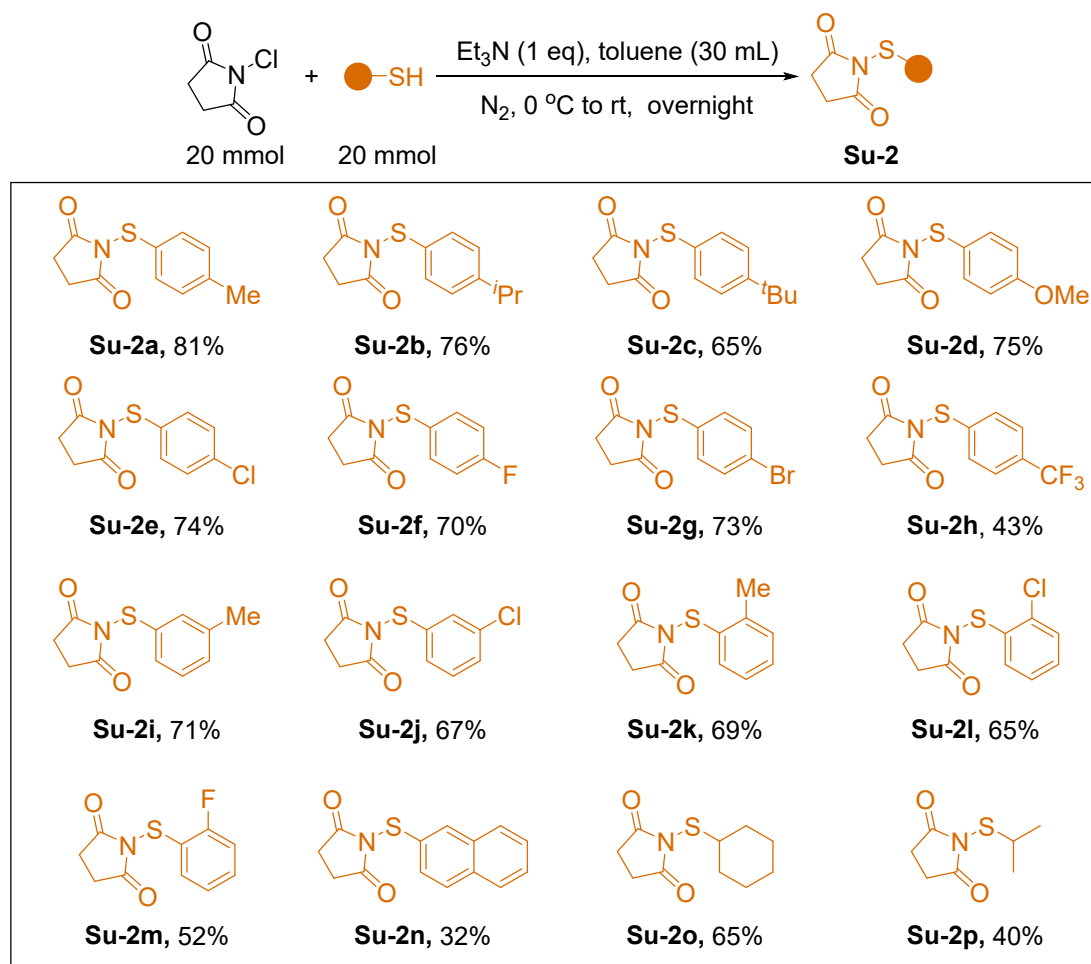

**Fig. S3** Synthetic route for preparing thiosuccinimides **Su-2a–Su-2p**.

### 3. Analytical data

#### *S*-(*p*-tolyl) 4-methylbenzenesulfonothioate (**Ts-2a**)<sup>1</sup>

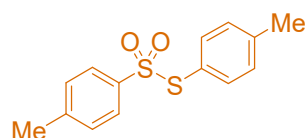

White solid; Yield: 76% (1.05 g);  $^1\text{H}$  NMR (400 MHz,  $\text{CDCl}_3$ )  $\delta$  7.45 (dd,  $J = 6.7$  Hz, 2H), 7.26–7.15 (m, 4H), 7.15–7.13 (m, 2H), 2.42 (s, 3H), 2.38 (s, 3H).  $^{13}\text{C}$  NMR (101



MHz, CDCl<sub>3</sub>)  $\delta$  144.6, 142.0, 140.4, 136.5, 130.2, 129.3, 127.6, 124.5, 21.6, 21.5.  
HRMS (ESI) calcd for C<sub>11</sub>H<sub>11</sub>O<sub>2</sub>NS, [M+H]<sup>+</sup>: 279.0513; found: 279.0508.

### 2-(*p*-tolylthio)isoindoline-1,3-dione (Phth-2a)<sup>2</sup>

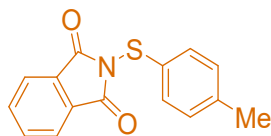

White solid; Yield: 58% (1.56 g); <sup>1</sup>H NMR (400 MHz, CDCl<sub>3</sub>)  $\delta$  7.90 (dd, *J* = 5.5, 3.1 Hz, 2H), 7.75 (dd, *J* = 5.5, 3.1 Hz, 2H), 7.59 (dd, *J* = 6.3, 1.9 Hz, 2H), 7.13 (dd, *J* = 8.6 Hz, 2H), 2.31 (s, 3H); <sup>13</sup>C NMR (101 MHz, CDCl<sub>3</sub>)  $\delta$  167.8, 140.3, 134.6, 132.7, 132.0, 131.4, 130.0, 123.9, 21.3; HRMS (ESI) calcd for C<sub>11</sub>H<sub>11</sub>O<sub>2</sub>NS, [M+H]<sup>+</sup>: 270.0589; found: 270.0595.

### 1-(*p*-tolylthio)pyrrolidine-2,5-dione (Su-2a)<sup>3</sup>

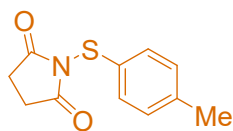

White solid; Yield: 81% (3.58 g); <sup>1</sup>H NMR (400 MHz, CDCl<sub>3</sub>)  $\delta$  7.56 (dd, *J* = 8.2, 1.7 Hz, 2H), 7.12 (d, *J* = 7.8 Hz, 2H), 2.76 (d, *J* = 0.9 Hz, 2H), 2.31 (s, 3H); <sup>13</sup>C NMR (101 MHz, CDCl<sub>3</sub>)  $\delta$  176.3, 140.3, 132.7, 130.1, 129.7, 28.2, 20.9; HRMS (ESI) calcd for C<sub>11</sub>H<sub>11</sub>O<sub>2</sub>NS, [M+H]<sup>+</sup>: 222.0589; found: 222.0599.

### 1-((4-isopropylphenyl)thio)pyrrolidine-2,5-dione (Su-2b)<sup>4</sup>

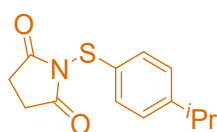

White solid; Yield: 76% (3.78 g); <sup>1</sup>H NMR (400 MHz, CDCl<sub>3</sub>)  $\delta$  7.57 (dd, *J* = 6.3 Hz, 2H), 7.15 (dd, *J* = 6.3 Hz, 2H), 2.85 (m, 1H), 2.75 (s, 4H), 1.17 (d, *J* = 6.9 Hz, 6H); <sup>13</sup>C NMR (101 MHz, CDCl<sub>3</sub>)  $\delta$  176.5, 151.4, 133.5, 130.4, 127.3, 33.8, 28.4, 23.6; HRMS (ESI) calcd for C<sub>13</sub>H<sub>15</sub>O<sub>2</sub>NS, [M+H]<sup>+</sup>: 250.0902; found: 250.0901.

### 1-((4-*tert*-butylphenyl)thio)pyrrolidine-2,5-dione (Su-2c)<sup>3</sup>

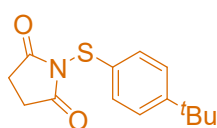

White solid; Yield: 65% (3.42 g);  $^1\text{H}$  NMR (400 MHz,  $\text{CDCl}_3$ )  $\delta$  7.54 (dd,  $J = 6.6$  Hz, 2H), 7.28 (dd,  $J = 6.5$  Hz, 2H), 2.72 (s, 4H), 1.21 (s, 9H);  $^{13}\text{C}$  NMR (101 MHz,  $\text{CDCl}_3$ )  $\delta$  176.5, 153.7, 133.3, 130.2, 126.3, 34.7, 31.0, 28.5; HRMS (ESI) calcd for  $\text{C}_{14}\text{H}_{17}\text{O}_2\text{NS}$ ,  $[\text{M}+\text{H}]^+$ : 264.1058; found: 264.1061.

#### 1-((4-methoxyphenyl)thio)pyrrolidine-2,5-dione (Su-2d)<sup>4</sup>

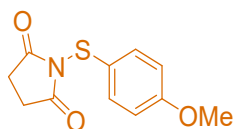

Pink solid; Yield: 75% (3.55 g);  $^1\text{H}$  NMR (400 MHz,  $\text{CDCl}_3$ )  $\delta$  7.72 (dd,  $J = 6.7$  Hz, 2H), 6.83 (dd,  $J = 6.7$  Hz, 2H), 3.78 (s, 3H), 2.74 (s, 4H);  $^{13}\text{C}$  NMR (101 MHz,  $\text{CDCl}_3$ )  $\delta$  176.6, 161.7, 137.3, 124.3, 114.6, 55.4, 28.5; HRMS (ESI) calcd for  $\text{C}_{11}\text{H}_{11}\text{O}_3\text{NS}$ ,  $[\text{M}+\text{H}]^+$ : 238.0538; found: 238.0535.

#### 1-((4-chlorophenyl)thio)pyrrolidine-2,5-dione (Su-2e)<sup>3</sup>

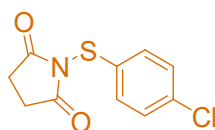

White solid; Yield: 74% (3.58 g);  $^1\text{H}$  NMR (400 MHz,  $\text{CDCl}_3$ )  $\delta$  7.58 (dd,  $J = 6.5, 2.0$  Hz, 2H), 7.31 (dd,  $J = 6.6, 2.1$  Hz, 2H), 2.83 (s, 4H);  $^{13}\text{C}$  NMR (101 MHz,  $\text{CDCl}_3$ )  $\delta$  176.2, 136.2, 133.9, 132.1, 129.4, 28.4; HRMS (ESI) calcd for  $\text{C}_{10}\text{H}_8\text{O}_2\text{ClNS}$ ,  $[\text{M}+\text{H}]^+$ : 242.0043; found: 242.0020.

#### 1-((4-fluorophenyl)thio)pyrrolidine-2,5-dione (Su-2f)<sup>3</sup>

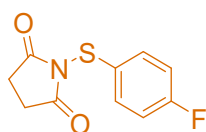

White solid; Yield: 70% (3.15 g);  $^1\text{H}$  NMR (400 MHz,  $\text{CDCl}_3$ )  $\delta$  7.71–7.66 (m, 2H), 7.01–6.96 (m, 2H), 2.76 (s, 4H);  $^{13}\text{C}$  NMR (101 MHz,  $\text{CDCl}_3$ )  $\delta$  176.3, 163.8 (d,  $J = 253.1$  Hz), 136.4 (d,  $J = 8.8$  Hz), 128.9 (d,  $J = 3.5$  Hz), 116.4 (d,  $J = 22.4$  Hz), 28.4;  $^{19}\text{F}$  NMR (376 MHz,  $\text{CDCl}_3$ )  $\delta$  -108.7; HRMS (ESI) calcd for  $\text{C}_{10}\text{H}_8\text{O}_2\text{FNS}$ ,  $[\text{M}+\text{H}]^+$ : 226.0338; found: 226.0339.

### 1-((4-bromophenyl)thio)pyrrolidine-2,5-dione (Su-2g)<sup>3</sup>

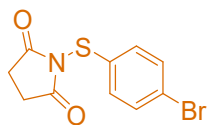

White solid; Yield: 73% (4.17 g); <sup>1</sup>H NMR (400 MHz, CDCl<sub>3</sub>) δ 7.51 (dd, *J* = 6.4 Hz, 2H), 7.46 (dd, *J* = 6.6 Hz, 2H), 2.82 (s, 4H); <sup>13</sup>C NMR (101 MHz, CDCl<sub>3</sub>) δ 176.2, 134.3, 132.7, 132.5, 124.8, 28.5; HRMS (ESI) calcd for C<sub>10</sub>H<sub>8</sub>O<sub>2</sub>BrNS, [M+H]<sup>+</sup>: 285.9537; found: 285.9539.

### 1-((4-(trifluoromethyl)phenyl)thio)pyrrolidine-2,5-dione (Su-2h)

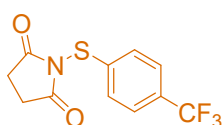

White solid; Yield: 43% (2.36 g); <sup>1</sup>H NMR (400 MHz, CDCl<sub>3</sub>) δ 7.56–7.50 (m, 4H), 2.87 (s, 4H); <sup>13</sup>C NMR (101 MHz, CDCl<sub>3</sub>) δ 176.0, 130.7 (q, *J* = 33.0 Hz), 129.3, 126.1 (q, *J* = 3.6 Hz), 123.5 (q, *J* = 273.1 Hz), 28.5; <sup>19</sup>F NMR (376 MHz, CDCl<sub>3</sub>) δ -62.9; HRMS (ESI) calcd for C<sub>11</sub>H<sub>8</sub>O<sub>2</sub>F<sub>3</sub>NS, [M+H]<sup>+</sup>: 276.0306; found: 276.0316.

### 1-(*m*-tolylthio)pyrrolidine-2,5-dione (Su-2i)<sup>4</sup>

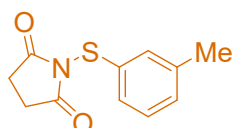

Yellow solid; Yield: 71% (3.14 g); <sup>1</sup>H NMR (400 MHz, CDCl<sub>3</sub>) δ 7.37 (s, 1H), 7.34 (d, *J* = 7.8 Hz, 1H), 7.19 (t, *J* = 7.6 Hz, 1H), 7.12 (d, *J* = 7.6 Hz, 1H), 2.79 (s, 4H), 2.31 (s, 3H); <sup>13</sup>C NMR (101 MHz, CDCl<sub>3</sub>) δ 176.3, 138.9, 133.4, 131.7, 130.2, 128.8, 128.3, 28.3, 20.9; HRMS (ESI) calcd for C<sub>11</sub>H<sub>11</sub>O<sub>2</sub>NS, [M+H]<sup>+</sup>: 222.0589; found: 222.0599.

### 1-((3-chlorophenyl)thio)pyrrolidine-2,5-dione (Su-2j)<sup>5</sup>

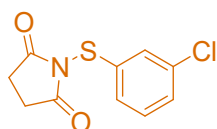

Pink solid; Yield: 67% (3.24 g); <sup>1</sup>H NMR (400 MHz, CDCl<sub>3</sub>) δ 7.51 (t, *J* = 1.9 Hz, 1H), 7.43 (dt, *J* = 7.5, 1.6 Hz, 1H), 7.29 (dt, *J* = 8.1, 1.6 Hz, 1H), 7.23 (t, *J* = 2.9 Hz, 1H), 2.83 (s, 4H); <sup>13</sup>C NMR (101 MHz, CDCl<sub>3</sub>) δ 176.1, 135.6, 135.0, 131.1, 130.4,

129.9, 129.5, 28.6; HRMS (ESI) calcd for C<sub>10</sub>H<sub>8</sub>O<sub>2</sub>CINS, [M+H]<sup>+</sup>: 242.0043; found: 242.0020.

#### 1-(*o*-tolylthio)pyrrolidine-2,5-dione (Su-2k)<sup>4</sup>

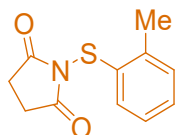

Yellow solid; Yield: 69% (3.05 g); <sup>1</sup>H NMR (400 MHz, CDCl<sub>3</sub>) δ 7.40 (d, *J* = 7.2 Hz, 1H), 7.22–7.17 (m, 2H), 7.13–7.09 (m, 1H), 2.80 (s, 4H), 2.56 (s, 3H); <sup>13</sup>C NMR (101 MHz, CDCl<sub>3</sub>) δ 176.4, 139.2, 133.0, 131.6, 130.6, 129.4, 126.7, 28.5, 20.2; HRMS (ESI) calcd for C<sub>11</sub>H<sub>11</sub>O<sub>2</sub>NS, [M+H]<sup>+</sup>: 222.0589; found: 222.0599.

#### 1-((2-chlorophenyl)thio)pyrrolidine-2,5-dione (Su-2l)<sup>5</sup>

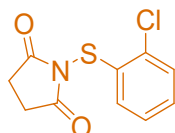

White solid; Yield: 65% (3.14 g); <sup>1</sup>H NMR (400 MHz, CDCl<sub>3</sub>) δ 7.36–7.33 (m, 1H), 7.22–7.14 (m, 2H), 6.92–6.89 (m, 1H), 2.93 (s, 4H); <sup>13</sup>C NMR (101 MHz, CDCl<sub>3</sub>) δ 175.9, 133.1, 130.0, 129.8, 128.1, 127.4, 125.4, 28.6; HRMS (ESI) calcd for C<sub>10</sub>H<sub>8</sub>O<sub>2</sub>CINS, [M+H]<sup>+</sup>: 242.0043; found: 242.0052.

#### 1-((2-fluorophenyl)thio)pyrrolidine-2,5-dione (Su-2m)<sup>3</sup>

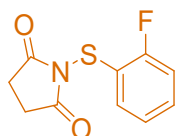

White solid; Yield: 52% (2.34 g); <sup>1</sup>H NMR (400 MHz, CDCl<sub>3</sub>) δ 7.56–7.52 (m, 1H), 7.37–7.31 (m, 1H), 7.13–7.05 (m, 2H), 2.83 (s, 4H); <sup>13</sup>C NMR (101 MHz, CDCl<sub>3</sub>) δ 176.0, 160.8, (d, *J* = 251 Hz), 133.7, 131.9 (d, *J* = 8.0 Hz), 124.8 (d, *J* = 3.8 Hz), 120.7 (d, *J* = 17.5 Hz), 116.4 (d, *J* = 21.9 Hz), 28.5; <sup>19</sup>F NMR (376 MHz, CDCl<sub>3</sub>) δ -107.7; HRMS (ESI) calcd for C<sub>10</sub>H<sub>8</sub>O<sub>2</sub>FNS, [M+H]<sup>+</sup>: 226.0338; found: 226.0339.

#### 1-(naphthalen-2-ylthio)pyrrolidine-2,5-dione (Su-2n)<sup>4</sup>

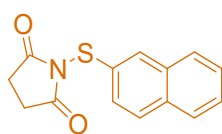

White solid; Yield: 32% (1.65 g);  $^1\text{H}$  NMR (400 MHz,  $\text{CDCl}_3$ )  $\delta$  8.16 (s, 1H), 7.82–7.76 (m, 3H), 7.64 (dd,  $J = 8.6, 1.8$  Hz, 1H), 7.53–7.47 (m, 2H), 2.77 (s, 4H);  $^{13}\text{C}$  NMR (101 MHz,  $\text{CDCl}_3$ )  $\delta$  176.5, 133.4, 133.1, 132.6, 130.9, 129.2, 128.8, 128.1, 127.6, 127.5, 126.9, 28.5; HRMS (ESI) calcd for  $\text{C}_{14}\text{H}_{11}\text{O}_2\text{NS}$ ,  $[\text{M}+\text{H}]^+$ : 258.0589; found: 258.0581.

### 1-(cyclohexylthio)pyrrolidine-2,5-dione (Su-2o)<sup>3</sup>

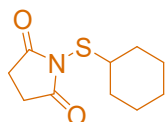

White solid; Yield: 65% (2.77 g);  $^1\text{H}$  NMR (400 MHz,  $\text{CDCl}_3$ )  $\delta$  3.17–3.13 (m, 1H), 2.81 (s, 4H), 1.80–1.73 (m, 4H), 1.60–1.56 (m, 1H), 1.26–1.21 (m, 5H);  $^{13}\text{C}$  NMR (101 MHz,  $\text{CDCl}_3$ )  $\delta$  177.4, 48.3, 30.8, 28.4, 25.3; HRMS (ESI) calcd for  $\text{C}_{10}\text{H}_{15}\text{O}_2\text{ClNS}$ ,  $[\text{M}+\text{H}]^+$ : 214.0902; found: 214.0891.

### 1-(isopropylthio)pyrrolidine-2,5-dione (Su-2p)<sup>3</sup>

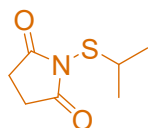

Colorless oil; Yield: 40% (1.38 g);  $^1\text{H}$  NMR (400 MHz,  $\text{CDCl}_3$ )  $\delta$  3.21–3.16 (m, 1H), 2.65 (s, 4H), 0.96 (d,  $J = 7.4$  Hz, 6H);  $^{13}\text{C}$  NMR (101 MHz,  $\text{CDCl}_3$ )  $\delta$  177.1, 39.8, 28.1, 20.2; HRMS (ESI) calcd for  $\text{C}_7\text{H}_{11}\text{O}_2\text{NS}$ ,  $[\text{M}+\text{H}]^+$ : 174.0589; found: 174.0562.

### Triethylamine hydrochloride<sup>6</sup>

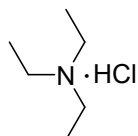

White solid;  $^1\text{H}$  NMR (400 MHz,  $\text{CDCl}_3$ )  $\delta$  10.44 (s, 1H), 2.94 (q,  $J = 14.6$  Hz, 6H), 1.20 (t,  $J = 7.4$  Hz, 9H);  $^{13}\text{C}$  NMR (101 MHz,  $\text{CDCl}_3$ )  $\delta$  45.5, 8.3.

### 4-((p-tolylthio)amino)benzenesulfonamide (3a)

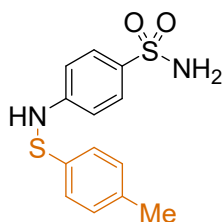

White solid; Yield: 84% (123.4 mg, *additive-free synthesis*), 71% (104.5 mg, *one-pot synthesis*); Mp: 123–124 °C; <sup>1</sup>H NMR (400 MHz, DMSO-*d*<sub>6</sub>) δ 8.48 (s, 1H), 7.64 (d, *J* = 8.7 Hz, 2H), 7.14 (d, *J* = 8.1 Hz, 2H), 7.15–7.07 (m, 6H), 2.23 (s, 3H); <sup>13</sup>C NMR (101 MHz, DMSO-*d*<sub>6</sub>) δ 150.7, 136.7, 135.2, 134.6, 129.8, 127.5, 123.0, 113.9, 20.6; HRMS (ESI) calcd for C<sub>13</sub>H<sub>14</sub>O<sub>2</sub>N<sub>2</sub>S<sub>2</sub>Na, [M+Na]<sup>+</sup>: 317.0394; found: 317.0391.

#### 4-(((4-isopropylphenyl)thio)amino)benzenesulfonamide (3b)

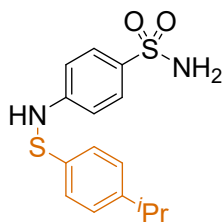

White solid; Yield: 83% (133.6 mg, *additive-free synthesis*), 63% (101.5 mg, *one-pot synthesis*); Mp: 133–135 °C; <sup>1</sup>H NMR (400 MHz, DMSO-*d*<sub>6</sub>) δ 8.47 (s, 1H), 7.63 (d, *J* = 8.7 Hz, 2H), 7.20 (d, *J* = 8.3 Hz, 2H), 7.11–7.08 (m, 6H), 2.87–2.77 (m, 1H), 1.14 (d, *J* = 6.8 Hz, 6H); <sup>13</sup>C NMR (101 MHz, DMSO-*d*<sub>6</sub>) δ 150.7, 146.2, 137.1, 134.6, 127.4, 127.2, 123.0, 113.8, 33.0, 23.8; HRMS (ESI) calcd for C<sub>15</sub>H<sub>19</sub>O<sub>2</sub>N<sub>2</sub>S<sub>2</sub>, [M+H]<sup>+</sup>: 323.0888; found: 323.0879.

#### 4-(((4-(*tert*-butyl)phenyl)thio)amino)benzenesulfonamide (3c)

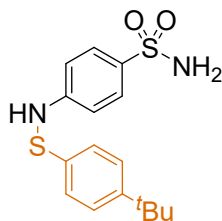

White solid; Yield: 86% (144.5 mg, *additive-free synthesis*), 67% (112.5 mg, *one-pot synthesis*); Mp: 125–127 °C; <sup>1</sup>H NMR (400 MHz, DMSO-*d*<sub>6</sub>) δ 8.49 (s, 1H), 7.65 (d, *J* = 8.7 Hz, 2H), 7.35 (d, *J* = 8.4 Hz, 2H), 7.13–7.10 (m, 6H), 1.22 (s, 9H); <sup>13</sup>C NMR (101 MHz, DMSO-*d*<sub>6</sub>) δ 150.7, 148.5, 136.9, 134.6, 127.5, 126.1, 122.7, 113.9, 34.2, 31.1; HRMS (ESI) calcd for C<sub>16</sub>H<sub>21</sub>O<sub>2</sub>N<sub>2</sub>S<sub>2</sub>, [M+H]<sup>+</sup>: 337.1044; found: 337.1032.

#### 4-(((4-methoxyphenyl)thio)amino)benzenesulfonamide (3d)

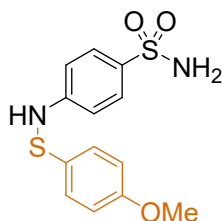

White solid; Yield: 35% (54.3 mg, *additive-free synthesis*); Mp: 107–109 °C; <sup>1</sup>H NMR (400 MHz, DMSO-*d*<sub>6</sub>) δ 8.44 (s, 1H), 7.61 (dd, *J* = 7.1 Hz, 2H), 7.21 (dd, *J* = 6.7 Hz, 2H), 7.09 (dd, *J* = 7.4 Hz, 4H), 6.93 (d, *J* = 6.8 Hz, 2H), 3.70 (s, 3H); <sup>13</sup>C NMR (101 MHz, DMSO-*d*<sub>6</sub>) δ 158.3, 150.7, 134.4, 130.3, 127.4, 126.4, 114.9, 113.9, 55.2; HRMS (ESI) calcd for C<sub>13</sub>H<sub>15</sub>O<sub>3</sub>N<sub>2</sub>S<sub>2</sub>Na, [M+Na]<sup>+</sup>: 333.0344; found: 333.0349.

#### 4-(((4-chlorophenyl)thio)amino)benzenesulfonamide (3e)

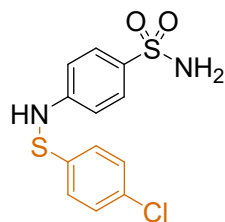

White solid; Yield: 78% (122.0 mg, *additive-free synthesis*), 70% (109.6 mg, *one-pot synthesis*); Mp: 111–113 °C; <sup>1</sup>H NMR (400 MHz, DMSO-*d*<sub>6</sub>) δ 8.57 (s, 1H), 7.66 (d, *J* = 8.0 Hz, 2H), 7.40 (dd, *J* = 6.6 Hz, 2H), 7.18 (dd, *J* = 6.7 Hz, 2H), 7.12–7.08 (m, 4H); <sup>13</sup>C NMR (101 MHz, DMSO-*d*<sub>6</sub>) δ 150.2, 139.6, 135.0, 130.1, 129.1, 127.5, 124.1, 113.9; HRMS (ESI) calcd for C<sub>12</sub>H<sub>12</sub>O<sub>2</sub>ClN<sub>2</sub>S<sub>2</sub>, [M+H]<sup>+</sup>: 315.0029; found: 315.0028.

#### 4-(((4-fluorophenyl)thio)amino)benzenesulfonamide (3f)

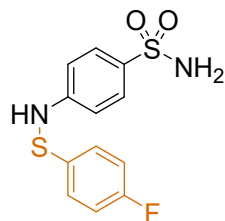

White solid; Yield: 65% (96.9 mg, *additive-free synthesis*), 56% (83.5 mg, *one-pot synthesis*); Mp: 137–139 °C; <sup>1</sup>H NMR (400 MHz, DMSO-*d*<sub>6</sub>) δ 8.54 (s, 1H), 7.64 (dd, *J* = 6.7 Hz, 2H), 7.25–7.18 (m, 4H), 7.11–7.08 (m, 4H); <sup>13</sup>C NMR (101 MHz, DMSO-*d*<sub>6</sub>) δ 160.7 (d, *J* = 243.5 Hz), 150.4, 135.7 (d, *J* = 2.8 Hz), 134.8, 127.5, 125.0, (d, *J* = 8.1 Hz), 116.3 (d, *J* = 22.2 Hz), 113.9; <sup>19</sup>F NMR (376 MHz, DMSO-*d*<sub>6</sub>) δ -117.0; HRMS (ESI) calcd for C<sub>12</sub>H<sub>11</sub>O<sub>2</sub>FN<sub>2</sub>S<sub>2</sub>Na, [M+Na]<sup>+</sup>: 321.0144; found: 321.0140.

#### 4-(((4-bromophenyl)thio)amino)benzenesulfonamide (3g)

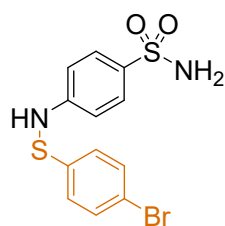

White solid; Yield: 62% (110.6 mg, *additive-free synthesis*), 51% (91.1 mg, *one-pot synthesis*); Mp: 135–136 °C;  $^1\text{H NMR}$  (400 MHz,  $\text{DMSO-}d_6$ )  $\delta$  8.57 (s, 1H), 7.65 (dd,  $J = 6.8$  Hz, 2H), 7.52 (dd,  $J = 6.6$  Hz, 2H), 7.13–7.12 (m, 3H), 7.11–7.09 (m, 2H), 7.08 (d,  $J = 2.0$  Hz, 1H);  $^{13}\text{C NMR}$  (101 MHz,  $\text{DMSO-}d_6$ )  $\delta$  150.2, 140.2, 135.0, 132.0, 127.5, 124.4, 118.3, 113.9; HRMS (ESI) calcd for  $\text{C}_{12}\text{H}_{12}\text{O}_2\text{BrN}_2\text{S}_2$ ,  $[\text{M}+\text{H}]^+$ : 358.9524; found: 358.9518.

#### 4-(((4-(trifluoromethyl)phenyl)thio)amino)benzenesulfonamide (3h)

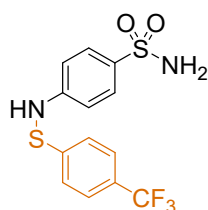

White solid; Yield: 64% (111.4 mg, *additive-free synthesis*), 57% (99.1 mg, *one-pot synthesis*);  $^1\text{H NMR}$  (400 MHz,  $\text{DMSO-}d_6$ )  $\delta$  8.64 (s, 1H), 7.70–7.65 (m, 4H), 7.35 (d,  $J = 8.2$  Hz, 2H), 7.16–7.08 (m, 4H);  $^{13}\text{C NMR}$  (101 MHz,  $\text{DMSO-}d_6$ )  $\delta$  149.9, 146.7, 135.2, 127.6, 126.0 (q,  $J = 3.7$  Hz), 126.4–125.5 (m), 122.9, 122.2, 113.9;  $^{19}\text{F NMR}$  (376 MHz,  $\text{DMSO-}d_6$ )  $\delta$  -60.7; HRMS (ESI) calcd for  $\text{C}_{13}\text{H}_{11}\text{O}_2\text{F}_3\text{N}_2\text{S}_2$ ,  $[\text{M}+\text{H}]^+$ : 349.0292; found: 349.0253.

#### 4-(((*m*-tolylthio)amino)benzenesulfonamide (3i)

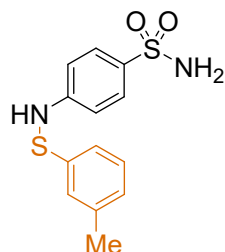

White solid; Yield: 65% (95.7 mg, *additive-free synthesis*), 40% (58.9 mg, *one-pot synthesis*); Mp: 153–155 °C;  $^1\text{H NMR}$  (400 MHz,  $\text{DMSO-}d_6$ )  $\delta$  8.48 (s, 1H), 7.65 (dd,  $J = 6.7$  Hz, 2H), 7.21 (t,  $J = 7.6$  Hz, 1H), 7.11–7.09 (m, 4H), 7.01 (s, 1H), 6.95 (d,  $J = 6.8$  Hz, 2H), 2.25 (s, 3H);  $^{13}\text{C NMR}$  (101 MHz,  $\text{DMSO-}d_6$ )  $\delta$  150.7, 140.2, 138.5,



134.7, 129.0, 127.5, 126.5, 122.7, 119.5, 113.9, 21.1; HRMS (ESI) calcd for  $C_{13}H_{14}O_2N_2S_2Na$ ,  $[M+Na]^+$ : 317.0394; found: 317.0391.

#### 4-(((3-chlorophenyl)thio)amino)benzenesulfonamide (3j)

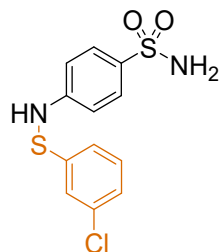

White solid; Yield: 72% (112.7 mg, *additive-free synthesis*), 64% (100.2 mg, *one-pot synthesis*); Mp: 145–147 °C;  $^1H$  NMR (400 MHz, DMSO- $d_6$ )  $\delta$  8.57 (s, 1H), 7.66 (d,  $J = 8.0$  Hz, 2H), 7.40 (dd,  $J = 6.6$  Hz, 2H), 7.18 (d,  $J = 6.6$  Hz, 2H), 7.12–7.08 (m, 4H);  $^{13}C$  NMR (101 MHz, DMSO- $d_6$ )  $\delta$  150.0, 143.4, 135.10, 134.0, 131.0, 127.6, 125.5, 121.5, 120.8, 114.0; HRMS (ESI) calcd for  $C_{12}H_{12}O_2ClN_2S_2$ ,  $[M+H]^+$ : 315.0029; found: 315.0028.

#### 4-(((*o*-tolylthio)amino)benzenesulfonamide (3k)

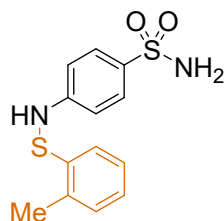

White solid; Yield: 80% (117.6 mg, *additive-free synthesis*), 68% (99.8 mg, *one-pot synthesis*); Mp: 133–135 °C;  $^1H$  NMR (400 MHz, DMSO- $d_6$ )  $\delta$  8.38 (s, 1H), 7.64 (d,  $J = 8.3$  Hz, 2H), 7.18–7.03 (m, 7H), 6.98 (d,  $J = 7.7$  Hz, 1H), 2.26 (s, 3H);  $^{13}C$  NMR (101 MHz, DMSO- $d_6$ )  $\delta$  150.5, 138.6, 134.7, 131.7, 130.3, 127.5, 126.5, 125.1, 121.3, 113.9, 18.1; HRMS (ESI) calcd for  $C_{13}H_{14}O_2N_2S_2Na$ ,  $[M+Na]^+$ : 317.0394; found: 317.0391.

#### 4-(((2-chlorophenyl)thio)amino)benzenesulfonamide (3l)

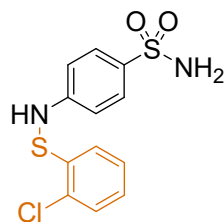

White solid; Yield: 82% (128.3 mg, *additive-free synthesis*), 63% (98.5 mg, *one-pot synthesis*); Mp: 141–143 °C;  $^1H$  NMR (400 MHz, DMSO- $d_6$ )  $\delta$  8.53 (s, 1H), 7.67 (d,

$J = 8.8$  Hz, 2H), 7.45 (dd,  $J = 8.1, 1.2$  Hz, 1H), 7.33–7.28 (m, 1H), 7.20–7.16 (m, 1H), 7.13 (s, 2H), 7.10 (dd,  $J = 6.8, 2.0$  Hz, 2H), 7.01 (dd,  $J = 6.4, 1.6$  Hz, 1H);  $^{13}\text{C}$  NMR (101 MHz,  $\text{DMSO-}d_6$ )  $\delta$  149.9, 138.7, 135.2, 129.7, 127.8, 127.6, 126.8, 126.5, 123.1, 114.0. HRMS (ESI) calcd for  $\text{C}_{12}\text{H}_{12}\text{O}_2\text{ClN}_2\text{S}_2$ ,  $[\text{M}+\text{H}]^+$ : 315.0029; found: 315.0015.

#### 4-(((2-fluorophenyl)thio)amino)benzenesulfonamide (3m)

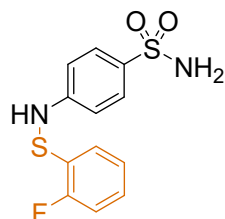

White solid; Yield: 61% (90.9 mg, *additive-free synthesis*), 48% (71.6 mg, *one-pot synthesis*); Mp: 126–128 °C;  $^1\text{H}$  NMR (400 MHz,  $\text{DMSO-}d_6$ )  $\delta$  8.45 (s, 1H), 7.65 (dd,  $J = 6.8, 2.0$  Hz, 2H), 7.27–7.07 (m, 8H), 7.09 (s, 1H);  $^{13}\text{C}$  NMR (101 MHz,  $\text{DMSO-}d_6$ )  $\delta$  157.0 (d,  $J = 241.0$  Hz) 150.0, 135.1, 127.6 (d,  $J = 7.1$  Hz), 127.5, 127.1 (d,  $J = 16.3$  Hz), 125.3 (d,  $J = 2.9$  Hz), 124.8 (d,  $J = 3.0$  Hz), 115.7 (d,  $J = 19.9$  Hz), 114.1;  $^{19}\text{F}$  NMR (376 MHz,  $\text{DMSO-}d_6$ )  $\delta$  -115.9; HRMS (ESI) calcd for  $\text{C}_{12}\text{H}_{11}\text{O}_2\text{FN}_2\text{S}_2\text{Na}$ ,  $[\text{M}+\text{Na}]^+$ : 321.0144; found: 321.0140.

#### 4-(((naphthalen-2-ylthio)amino)benzenesulfonamide (3n)

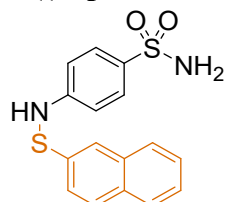

White solid; Yield: 87% (143.5 mg, *additive-free synthesis*), 67% (110.7 mg, *one-pot synthesis*); Mp: 163–165 °C;  $^1\text{H}$  NMR (400 MHz,  $\text{DMSO-}d_6$ )  $\delta$  8.63 (s, 1H), 7.89 (d,  $J = 8.7$  Hz, 1H), 7.85 (d,  $J = 7.9$  Hz, 1H), 7.77 (d,  $J = 7.8$  Hz, 1H), 7.64 (d,  $J = 8.7$  Hz, 3H), 7.46 (s, 2H), 7.36–7.42 (m, 2H), 7.34 (dd,  $J = 8.6, 1.9$  Hz, 1H), 7.14 (d,  $J = 8.7$  Hz), 7.09 (s, 2H);  $^{13}\text{C}$  NMR (101 MHz,  $\text{DMSO-}d_6$ )  $\delta$  161.9, 159.5, 150.4, 135.7 (d,  $J = 2.9$  Hz), 134.8, 127.5, 125.1, 125.0, 116.4, 116.2, 113.9; HRMS (ESI) calcd for  $\text{C}_{16}\text{H}_{15}\text{O}_2\text{N}_2\text{S}_2$ ,  $[\text{M}+\text{H}]^+$ : 331.0575; found: 331.0558.

#### 4-((cyclohexylthio)amino)benzenesulfonamide (3o)

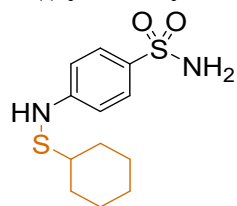

White solid; Yield: 21% (30.1 mg, *additive-free synthesis*); Mp: 112–114 °C; <sup>1</sup>H NMR (400 MHz, DMSO-*d*<sub>6</sub>) δ 7.75 (s, 1H), 7.59 (d, *J* = 8.7 Hz, 2H), 7.10–7.05 (m, 4H), 2.85–2.80 (m, 1H), 1.86–1.82 (m, 2H), 1.71–1.68 (m, 2H), 1.57–1.51 (m, 1H), 1.29–1.14 (m, 5H); <sup>13</sup>C NMR (101 MHz, DMSO-*d*<sub>6</sub>) δ 152.5, 133.4, 127.2, 113.4, 47.9, 30.6, 25.3, 25.2; HRMS (ESI) calcd for C<sub>12</sub>H<sub>18</sub>O<sub>2</sub>N<sub>2</sub>S<sub>2</sub>, [M+H]<sup>+</sup>: 287.0888; found: 287.0895.

#### *N*-((4-((*p*-tolylthio)amino)phenyl)sulfonyl)acetamide (4a)

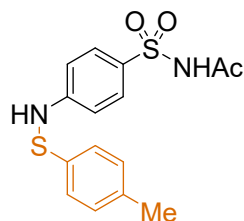

Yellow oil; Yield: 86% (144.5 mg, *additive-free synthesis*), 64% (107.5 mg, *one-pot synthesis*); <sup>1</sup>H NMR (400 MHz, DMSO-*d*<sub>6</sub>) δ 11.82 (s, 1H), 8.68 (s, 1H), 7.75–7.70 (m, 2H), 7.17–7.08 (m, 6H), 2.24 (s, 3H), 1.90 (s, 3H); <sup>13</sup>C NMR (101 MHz, DMSO-*d*<sub>6</sub>) δ 168.7, 152.5, 136.4, 135.5, 129.9, 129.7, 129.0, 123.3, 113.9, 23.3, 20.6; HRMS (ESI) calcd for C<sub>15</sub>H<sub>17</sub>O<sub>3</sub>N<sub>2</sub>S<sub>2</sub>, [M+H]<sup>+</sup>: 337.0681; found: 337.0695.

#### *N*-((4-(((4-isopropylphenyl)thio)amino)phenyl)sulfonyl)acetamide (4b)

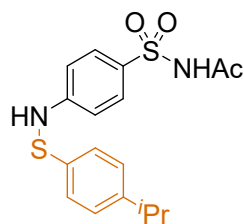

White solid; Yield: 82% (149.2 mg, *additive-free synthesis*), 63% (114.7 mg, *one-pot synthesis*); Mp: 126–128 °C; <sup>1</sup>H NMR (400 MHz, DMSO-*d*<sub>6</sub>) δ 11.84 (s, 1H), 8.68 (s, 1H), 7.72 (d, *J* = 8.8 Hz, 2H), 7.21 (d, *J* = 8.4 Hz, 2H), 7.14 (d, *J* = 1.4 Hz, 2H), 7.12 (d, *J* = 0.8 Hz, 2H), 2.86–2.76 (m, 1H), 1.88 (s, 3H), 1.14 (d, *J* = 7.0 Hz, 6H); <sup>13</sup>C NMR (101 MHz, DMSO-*d*<sub>6</sub>) δ 168.7, 152.5, 146.4, 136.8, 129.7, 129.1, 127.3, 123.2,

113.8, 33.0, 23.8, 23.3; HRMS (ESI) calcd for C<sub>17</sub>H<sub>21</sub>O<sub>3</sub>N<sub>2</sub>S<sub>2</sub>, [M+H]<sup>+</sup>: 365.0994; found: 365.0969.

***N*-((4-(((4-*tert*-butyl)phenyl)thio)amino)phenyl)sulfonyl)acetamide (4c)**

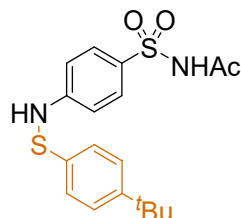

White solid; Yield: 80% (151.2 mg, *additive-free synthesis*), 65% (122.8 mg, *one-pot synthesis*); Mp: 133–135 °C; <sup>1</sup>H NMR (400 MHz, DMSO-*d*<sub>6</sub>) δ 11.86 (s, 1H), 8.69 (s, 1H), 7.72 (d, *J* = 8.9 Hz, 2H), 7.36 (d, *J* = 8.5 Hz, 2H), 7.14 (d, *J* = 2.0 Hz, 2H), 7.12 (d, *J* = 2.0 Hz, 2H), 1.88 (s, 3H), 1.22 (s, 9H); <sup>13</sup>C NMR (101 MHz, DMSO-*d*<sub>6</sub>) δ 168.6, 152.5, 148.7, 136.6, 129.7, 129.0, 126.2, 122.9, 113.8, 34.2, 31.1, 23.3; HRMS (ESI) calcd for C<sub>18</sub>H<sub>23</sub>O<sub>3</sub>N<sub>2</sub>S<sub>2</sub>, [M+H]<sup>+</sup>: 379.1150; found: 379.1152.

***N*-((4-(((4-chlorophenyl)thio)amino)phenyl)sulfonyl)acetamide (4d)**

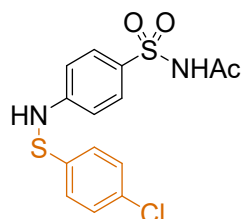

Colorless oil; Yield: 84% (149.5 mg, *additive-free synthesis*), 71% (126.4 mg, *one-pot synthesis*); <sup>1</sup>H NMR (400 MHz, DMSO-*d*<sub>6</sub>) δ 11.83 (s, 1H), 8.76 (s, 1H), 7.74 (d, *J* = 8.8 Hz, 2H), 7.40 (d, *J* = 8.6 Hz, 2H), 7.20 (d, *J* = 8.6 Hz, 2H), 7.13 (d, *J* = 8.9 Hz, 2H), 1.88 (s, 3H); <sup>13</sup>C NMR (101 MHz, DMSO-*d*<sub>6</sub>) δ 168.7, 152.0, 139.3, 130.3, 129.7, 129.5, 129.2, 124.3, 114.0, 23.3; HRMS (ESI) calcd. for C<sub>14</sub>H<sub>14</sub>O<sub>3</sub>ClN<sub>2</sub>S<sub>2</sub>, [M+H]<sup>+</sup>: 357.0134; found: 357.0128.

***N*-((4-(((4-fluorophenyl)thio)amino)phenyl)sulfonyl)acetamide (4e)**

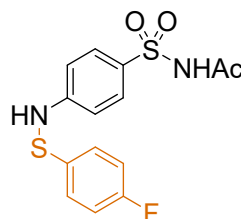

White solid; Yield: 84% (142.8 mg, *additive-free synthesis*), 70% (119.1 mg, *one-pot synthesis*); Mp: 137–139 °C; <sup>1</sup>H NMR (400 MHz, DMSO-*d*<sub>6</sub>) δ 11.87 (s, 1H), 8.75 (s,

1H), 7.74 (d,  $J = 8.8$  Hz, 2H), 7.27–7.24 (m, 2H), 7.22–7.17 (m, 2H), 7.16–7.13 (m, 2H), 1.89 (s, 3H);  $^{13}\text{C}$  NMR (101 MHz, DMSO- $d_6$ )  $\delta$  168.7, 162.0, 159.6, 152.2, 135.5 (d,  $J = 2.6$  Hz), 129.7, 129.3, 125.4, 125.3, 116.5, 116.3, 113.9, 23.2;  $^{19}\text{F}$  NMR (376 MHz, DMSO- $d_6$ )  $\delta$  -116.7; HRMS (ESI) calcd for  $\text{C}_{14}\text{H}_{14}\text{O}_3\text{FN}_2\text{S}_2$ ,  $[\text{M}+\text{H}]^+$ : 341.0430; found: 341.0407.

***N*-((4-(((4-bromophenyl)thio)amino)phenyl)sulfonyl)acetamide (4f)**

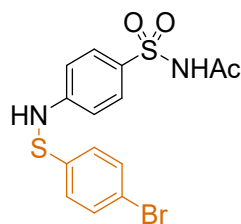

White solid; Mp: 129–130 °C; Yield: 87% (173.6 mg, *additive-free synthesis*), 82% (163.5 mg, *one-pot synthesis*);  $^1\text{H}$  NMR (400 MHz, DMSO- $d_6$ )  $\delta$  11.87 (s, 1H), 8.76 (s, 1H), 7.74 (d,  $J = 8.9$  Hz, 2H), 7.52 (d,  $J = 8.6$  Hz, 2H), 7.15–7.10 (m, 4H), 1.89 (s, 3H);  $^{13}\text{C}$  NMR (101 MHz, DMSO- $d_6$ )  $\delta$  168.7, 152.0, 139.9, 132.0, 129.8, 129.4, 124.5, 118.5, 114.0, 23.3; HRMS (ESI) calcd for  $\text{C}_{14}\text{H}_{14}\text{O}_3\text{BrN}_2\text{S}_2$ ,  $[\text{M}+\text{H}]^+$ : 400.9629; found: 400.9633.

***N*-((4-(((4-(trifluoromethyl)phenyl)thio)amino)phenyl)sulfonyl)acetamide (4g)**

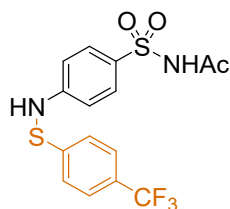

White solid; Yield: 41% (79.9 mg, *additive-free synthesis*);  $^1\text{H}$  NMR (400 MHz, DMSO- $d_6$ )  $\delta$  11.89 (s, 1H), 8.83 (s, 1H), 7.81–7.67 (m, 4H), 7.36 (d,  $J = 8.6$  Hz, 2H), 7.14 (dd,  $J = 9.0, 2.1$  Hz, 2H), 1.88 (s, 3H);  $^{13}\text{C}$  NMR (101 MHz, DMSO- $d_6$ )  $\delta$  168.6, 151.7, 146.4, 129.8, 126.5–125.6 (m), 126.0 (d,  $J = 4.4$  Hz), 122.9, 122.3, 114.0, 23.2;  $^{19}\text{F}$  NMR (376 MHz, DMSO- $d_6$ )  $\delta$  -60.7. HRMS (ESI) calcd for  $\text{C}_{15}\text{H}_{13}\text{O}_3\text{F}_3\text{N}_2\text{S}_2$ ,  $[\text{M}+\text{H}]^+$ : 391.0398; found: 391.0418.

***N*-((4-((*m*-tolylthio)amino)phenyl)sulfonyl)acetamide (4h)**

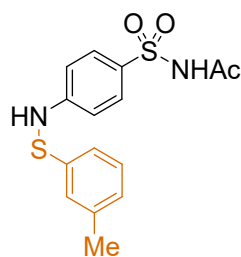

White solid; Yield: 77% (129.3 mg, *additive-free synthesis*), 56% (94.1 mg, *one-pot synthesis*); Mp: 133–135 °C; <sup>1</sup>H NMR (400 MHz, DMSO-*d*<sub>6</sub>) δ 11.82 (s, 1H), 8.68 (s, 1H), 7.72 (d, *J* = 8.9 Hz, 2H), 7.21 (t, *J* = 7.7 Hz, 1H), 7.13–7.11 (m, 2H), 7.02 (s, 1H), 6.98–6.97 (m, 2H), 2.25 (s, 3H), 1.88 (s, 3H); <sup>13</sup>C NMR (101 MHz, DMSO-*d*<sub>6</sub>) δ 168.7, 152.4, 139.9, 138.6, 129.7, 129.2, 129.1, 126.7, 122.9, 119.7, 113.9, 23.3, 21.1; HRMS (ESI) calcd. for C<sub>15</sub>H<sub>17</sub>O<sub>3</sub>N<sub>2</sub>S<sub>2</sub> [M+H]<sup>+</sup>: 337.0681; found: 337.0673.

***N*-((4-(((3-chlorophenyl)thio)amino)phenyl)sulfonyl)acetamide (4i)**

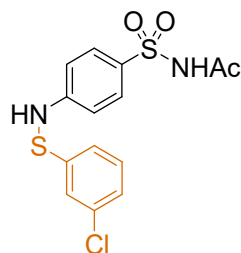

White solid; Yield: 66% (117.5 mg, *additive-free synthesis*), 43% (76.6 mg, *one-pot synthesis*); Mp: 145–146 °C; <sup>1</sup>H NMR (400 MHz, DMSO-*d*<sub>6</sub>) δ 11.88 (s, 1H), 8.77 (s, 1H), 7.76 (dd, *J* = 9.0, 1.1 Hz, 2H), 7.37–7.33 (m, 1H), 7.22–7.19 (m, 2H), 7.16–7.13 (m, 3H), 1.89 (s, 3H); <sup>13</sup>C NMR (101 MHz, DMSO-*d*<sub>6</sub>) δ 168.6, 151.7, 143.0, 133.9, 130.9, 129.6, 129.5, 125.6, 121.5, 120.8, 113.9, 23.2; HRMS (ESI) calcd for C<sub>14</sub>H<sub>14</sub>O<sub>3</sub>ClN<sub>2</sub>S<sub>2</sub>, [M+H]<sup>+</sup>: 357.0134; found: 357.0128.

***N*-((4-((*o*-tolylthio)amino)phenyl)sulfonyl)acetamide (4j)**

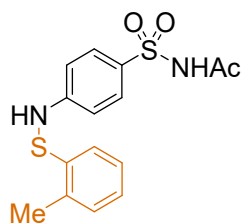

White solid; Yield: 81% (136.1 mg, *additive-free synthesis*), 65% (109.2 mg, *one-pot synthesis*); Mp: 141–143 °C; <sup>1</sup>H NMR (400 MHz, DMSO-*d*<sub>6</sub>) δ 11.87 (s, 1H), 8.76 (s, 1H), 7.73 (d, *J* = 8.9 Hz, 2H), 7.40 (d, *J* = 8.6 Hz, 2H), 7.20 (d, *J* = 8.7 Hz, 2H), 7.12

(d,  $J = 8.9$  Hz, 2H), 1.88 (s, 3H);  $^{13}\text{C}$  NMR (101 MHz,  $\text{DMSO-}d_6$ )  $\delta$  168.6, 152.4, 138.3, 131.9, 130.4, 129.7, 129.1, 126.6, 125.3, 121.5, 113.9, 23.3, 18.2; HRMS (ESI) calcd. for  $\text{C}_{15}\text{H}_{17}\text{O}_3\text{N}_2\text{S}_2$   $[\text{M}+\text{H}]^+$ : 337.0681; found: 337.0695.

***N*-((4-(((2-chlorophenyl)thio)amino)phenyl)sulfonyl)acetamide (4k)**

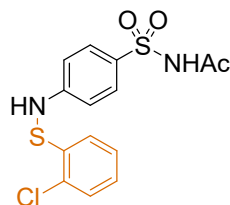

White solid; Yield: 90% (160.2 mg, *additive-free synthesis*), 84% (149.5 mg, *one-pot synthesis*); Mp: 137–139 °C;  $^1\text{H}$  NMR (400 MHz,  $\text{DMSO-}d_6$ )  $\delta$  11.87 (s, 1H), 8.72 (s, 1H), 7.75 (d,  $J = 8.8$  Hz, 2H), 7.45 (dd,  $J = 7.9, 1.3$  Hz, 1H), 7.33–7.29 (m, 1H), 7.20–7.16 (m, 1H), 7.14–7.12 (m, 2H), 7.03 (dd,  $J = 7.9, 1.5$  Hz, 1H), 1.89 (s, 3H);  $^{13}\text{C}$  NMR (101 MHz,  $\text{DMSO-}d_6$ )  $\delta$  168.7, 151.7, 138.5, 129.8, 129.8, 129.7, 128.0, 126.9, 126.6, 123.1, 114.1, 23.3; HRMS (ESI) calcd for  $\text{C}_{14}\text{H}_{14}\text{O}_3\text{ClN}_2\text{S}_2$ ,  $[\text{M}+\text{H}]^+$ : 357.0134; found: 357.0128.

***N*-((4-(((2-fluorophenyl)thio)amino)phenyl)sulfonyl)acetamide (4l)**

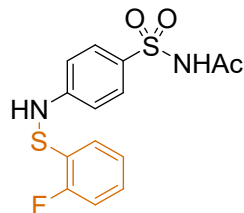

White solid; Yield: 72% (122.4 mg, *additive-free synthesis*), 58% (98.6 mg, *one-pot synthesis*); Mp: 158–160 °C;  $^1\text{H}$  NMR (400 MHz,  $\text{DMSO-}d_6$ )  $\delta$  11.80 (s, 1H), 8.64 (s, 1H), 7.75 (d,  $J = 8.9$  Hz, 2H), 7.25–7.22 (m, 2H), 7.19–7.10 (m, 4H), 1.88 (s, 3H);  $^{13}\text{C}$  NMR (101 MHz,  $\text{DMSO-}d_6$ )  $\delta$  168.7, 158.2, 155.8, 151.9, 129.7, 129.6, 127.9, 127.8, 126.9, 126.7, 125.3, 125.0, 124.9, 115.8, 115.6, 114.0, 23.2;  $^{19}\text{F}$  NMR (376 MHz,  $\text{DMSO-}d_6$ )  $\delta$  -115.6. HRMS (ESI) calcd for  $\text{C}_{14}\text{H}_{14}\text{O}_3\text{FN}_2\text{S}_2$ ,  $[\text{M}+\text{H}]^+$ : 341.0430; found: 341.0445.

***N*-((4-((naphthalen-2-ylthio)amino)phenyl)sulfonyl)acetamide (4m)**

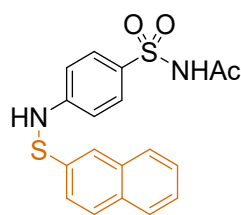

White solid; Yield: 65% (121.0 mg, additive-free synthesis), 56% (104.1 mg, one-pot synthesis); Mp: 155–157 °C; <sup>1</sup>H NMR (400 MHz, DMSO-*d*<sub>6</sub>) δ 11.86 (s, 1H), 8.85 (s, 1H), 7.90 (d, *J* = 8.7 Hz, 1H), 7.85 (d, *J* = 8.5 Hz, 1H), 7.78 (d, *J* = 8.5 Hz, 1H), 7.75 (d, *J* = 8.9 Hz, 2H), 7.67 (s, 1H), 7.49–7.42 (m, 2H), 7.37 (dd, *J* = 8.6, 1.9 Hz, 1H), 7.20 (d, *J* = 9.0 Hz, 2H), 1.88 (s, 3H); <sup>13</sup>C NMR (101 MHz, DMSO-*d*<sub>6</sub>) δ 168.7, 152.4, 137.8, 133.2, 131.4, 129.7, 129.3, 129.0, 127.9, 127.0, 125.7, 121.2, 120.1, 114.0, 23.3; HRMS (ESI) calcd for C<sub>18</sub>H<sub>17</sub>O<sub>3</sub>N<sub>2</sub>S<sub>2</sub>, [M+H]<sup>+</sup>: 373.0681; found: 373.0660.

**4-(((4-isopropylphenyl)thio)amino)-*N*-(6-methoxypyrimidin-4-yl) benzenesulfonamide (5a)**

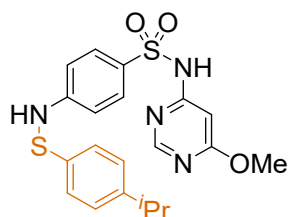

White solid; Yield: 63% (135.5 mg, additive-free synthesis), 56% (120.4 mg, one-pot synthesis); Mp: 166–168 °C; <sup>1</sup>H NMR (400 MHz, DMSO-*d*<sub>6</sub>) δ 11.47 (s, 1H), 8.35 (s, 1H), 7.81 (d, *J* = 2.2 Hz, 1H), 7.62 (dd, *J* = 8.7, 2.3 Hz, 1H), 7.13 (d, *J* = 8.3 Hz, 2H), 6.99 (d, *J* = 8.3 Hz, 2H), 6.82 (d, *J* = 8.7 Hz, 1H), 6.37 (s, 2H), 6.27 (s, 1H), 3.83 (s, 3H), 2.87–2.76 (m, 1H), 1.15 (d, *J* = 6.9 Hz, 6H); <sup>13</sup>C NMR (101 MHz, DMSO-*d*<sub>6</sub>) δ 169.8, 158.8, 153.9, 146.8, 136.6, 132.1, 129.9, 127.7, 127.3, 114.1, 112.5, 90.8, 54.0, 33.0, 23.8; HRMS (ESI) calcd for C<sub>20</sub>H<sub>23</sub>O<sub>3</sub>N<sub>4</sub>S<sub>2</sub>, [M+H]<sup>+</sup>: 431.1212; found: 431.1226.

**4-(((4-methoxyphenyl)thio)amino)-*N*-(6-methoxypyrimidin-4-yl) benzenesulfonamide (5b)**

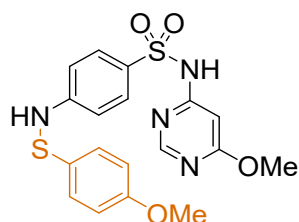



White solid; Yield: 31% (64.8 mg, *additive-free synthesis*); Mp: 122–123 °C; <sup>1</sup>H NMR (400 MHz, DMSO-*d*<sub>6</sub>) δ 11.68 (s, 1H), 8.59 (s, 1H), 8.38 (d, *J* = 1.0 Hz, 1H), 7.72 (d, *J* = 8.8 Hz, 2H), 7.21 (d, *J* = 8.8 Hz, 2H), 7.10 (d, *J* = 8.8 Hz, 2H), 6.91 (d, *J* = 8.8 Hz, 2H), 6.30 (d, *J* = 1.0 Hz, 1H), 3.82 (s, 3H), 3.70 (s, 3H); <sup>13</sup>C NMR (101 MHz, DMSO-*d*<sub>6</sub>) δ 169.8, 158.7, 158.4, 152.1, 130.0, 128.9, 126.7, 114.9, 114.0, 90.7, 56.0, 55.2, 54.0, 18.6; HRMS (ESI) calcd for C<sub>18</sub>H<sub>17</sub>O<sub>4</sub>N<sub>4</sub>S<sub>2</sub>, [M+H]<sup>+</sup>: 419.0848; found: 419.0867.

#### ***N*-(6-methoxypyrimidin-4-yl)-4-((*o*-tolylthio)amino)benzenesulfonamide (5c)**

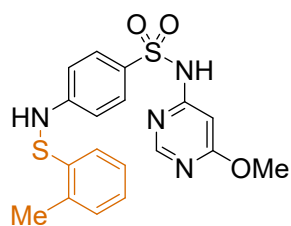

White solid; Yield: 70% (140.7 mg, *additive-free synthesis*), 62% (124.6 mg, *one-pot synthesis*); Mp: 132–134 °C; <sup>1</sup>H NMR (400 MHz, DMSO-*d*<sub>6</sub>) δ 11.72 (s, 1H), 8.53 (s, 1H), 8.39 (d, *J* = 0.9 Hz, 1H), 7.75 (d, *J* = 8.8 Hz, 2H), 7.17 (d, *J* = 7.0 Hz, 1H), 7.12–7.08 (m, 3H), 7.06–7.02 (m, 1H), 6.96 (dd, *J* = 7.8, 1.4 Hz, 1H), 6.31 (d, *J* = 0.9 Hz, 1H), 3.82 (s, 3H), 2.24 (s, 3H); <sup>13</sup>C NMR (101 MHz, DMSO-*d*<sub>6</sub>) δ 169.9, 158.7, 151.9, 138.3, 131.8, 130.4, 129.0, 126.5, 125.3, 121.4, 114.1, 90.8, 54.1, 18.1; HRMS (ESI) calcd for C<sub>18</sub>H<sub>19</sub>O<sub>3</sub>N<sub>4</sub>S<sub>2</sub>, [M+H]<sup>+</sup>: 403.0899; found: 403.0918.

#### **4-(((2-chlorophenyl)thio)amino)-*N*-(6-methoxypyrimidin-4-yl)benzenesulfonamide (5d)**

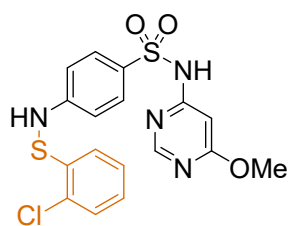

White solid; Yield: 83% (175.1 mg, *additive-free synthesis*), 69% (145.6 mg, *one-pot synthesis*); Mp: 124–126 °C; <sup>1</sup>H NMR (400 MHz, DMSO-*d*<sub>6</sub>) δ 11.75 (s, 1H), 8.66 (s, 1H), 8.39 (s, 1H), 7.77 (d, *J* = 8.8 Hz, 2H), 7.45 (d, *J* = 6.9 Hz, 1H), 7.30–7.26 (m, 1H), 7.20–7.15 (m, 1H), 7.10 (d, *J* = 8.9 Hz, 2H), 6.99 (dd, *J* = 8.0, 1.6 Hz, 1H), 6.30 (s, 1H), 3.83 (s, 3H); <sup>13</sup>C NMR (101 MHz, DMSO-*d*<sub>6</sub>) δ 169.8, 158.8, 151.2, 138.5, 129.7, 129.1, 127.9, 126.8, 126.5, 123.0, 114.2, 90.8, 54.1, 29.5; HRMS (ESI) calcd for C<sub>18</sub>H<sub>16</sub>O<sub>3</sub>ClN<sub>4</sub>S<sub>2</sub>, [M+H]<sup>+</sup>: 423.0352; found: 423.0363.

#### 4-(((4-fluorophenyl)thio)amino)-N-(thiazol-2-yl)benzenesulfonamide (5e)

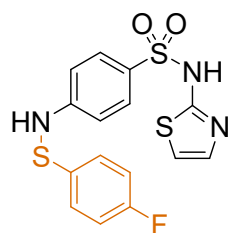

Yellow solid; Yield: 20% (38.1 mg, *additive-free synthesis*); Mp: 118–120 °C; <sup>1</sup>H NMR (400 MHz, DMSO-*d*<sub>6</sub>) δ 12.57 (s, 1H), 8.54 (s, 1H), 7.62 (d, *J* = 8.7 Hz, 2H), 7.24–7.16 (m, 5H), 7.07 (d, *J* = 8.7 Hz, 2H), 6.77 (d, *J* = 4.6 Hz, 1H); <sup>13</sup>C NMR (101 MHz, DMSO-*d*<sub>6</sub>) δ 168.4, 161.9, 159.5, 150.7, 135.8 (d, *J* = 2.9 Hz), 132.9, 127.7, 125.1, 125.0, 116.4, 116.2, 113.9, 107.9; <sup>19</sup>F NMR (376 MHz, DMSO-*d*<sub>6</sub>) δ -117.0; HRMS (ESI) calcd for C<sub>15</sub>H<sub>13</sub>O<sub>2</sub>FN<sub>3</sub>S<sub>3</sub>, [M+H]<sup>+</sup>: 382.0154; found: 382.0161.

#### N-(pyrimidin-2-yl)-4-(*p*-tolylthio)amino)benzenesulfonamide (5f)

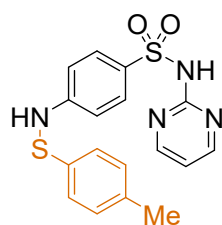

White solid; Yield: 66% (122.7 mg, *additive-free synthesis*), 57% (105.9 mg, *one-pot synthesis*); Mp: 138–140 °C; <sup>1</sup>H NMR (400 MHz, DMSO-*d*<sub>6</sub>) δ 11.53 (s, 1H), 8.58 (s, 1H), 8.48 (d, *J* = 4.8 Hz, 2H), 7.80 (d, *J* = 8.9 Hz, 2H), 7.12 (d, *J* = 8.1 Hz, 2H), 7.10–7.06 (m, 4H), 7.03–7.00 (m, 1H), 2.21 (s, 3H); <sup>13</sup>C NMR (101 MHz, DMSO-*d*<sub>6</sub>) δ 158.4, 157.1, 151.9, 136.5, 135.3, 130.1, 129.8, 129.7, 123.1, 115.7, 113.7, 20.5; HRMS (ESI) calcd for C<sub>17</sub>H<sub>17</sub>O<sub>2</sub>N<sub>4</sub>S<sub>2</sub>, [M+H]<sup>+</sup>: 373.0793; found: 373.0798.

#### 4-(((4-*tert*-butyl)phenyl)thio)amino)-N-(pyrimidin-2-yl)benzenesulfonamide (5g)

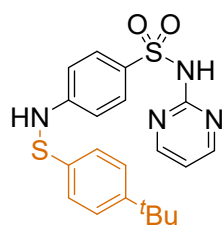

White solid; Yield: 61% (126.2 mg, *additive-free synthesis*), 53% (109.7 mg, *one-pot synthesis*); Mp: 129–131 °C; <sup>1</sup>H NMR (400 MHz, DMSO-*d*<sub>6</sub>) δ 11.53 (s, 1H), 8.59 (s, 1H), 8.48 (d, *J* = 4.8 Hz, 2H), 7.81 (d, *J* = 8.9 Hz, 2H), 7.33 (d, *J* = 8.6 Hz, 2H), 7.11–7.09 (m, 4H), 7.01–7.00 (m, 1H), 1.21 (s, 9H); <sup>13</sup>C NMR (101 MHz, DMSO-*d*<sub>6</sub>) δ

158.4, 157.1, 151.9, 148.6, 136.7, 130.1, 129.7, 126.1, 122.8, 115.7, 113.7, 34.2, 31.1; HRMS (ESI) calcd for C<sub>20</sub>H<sub>23</sub>O<sub>2</sub>N<sub>4</sub>S<sub>2</sub>, [M+H]<sup>+</sup>: 415.1262; found: 415.1265.

**4-(((4-(*tert*-butyl)phenyl)thio)amino)-*N*-(4-methylpyrimidin-2-yl) benzenesulfonamide (5h)**

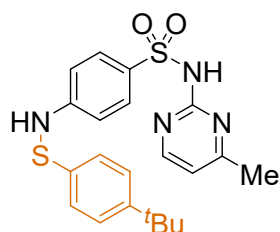

White solid; Yield: 45% (96.4 mg, *additive-free synthesis*); Mp: 165–167 °C; <sup>1</sup>H NMR (400 MHz, DMSO-*d*<sub>6</sub>) δ 11.42 (s, 1H), 8.57 (s, 1H), 8.29 (d, *J* = 5.1 Hz, 1H), 7.82 (d, *J* = 9.1 Hz, 2H), 7.32 (d, *J* = 8.3 Hz, 2H), 7.09 (d, *J* = 8.0 Hz, 4H), 6.86 (d, *J* = 5.1 Hz, 1H), 2.27 (s, 3H), 1.20 (s, 9H); <sup>13</sup>C NMR (101 MHz, DMSO-*d*<sub>6</sub>) δ 168.2, 157.7, 156.8, 151.9, 148.6, 136.7, 130.2, 130.0, 126.1, 122.9, 114.9, 113.6, 34.2, 31.1, 23.4; HRMS (ESI) calcd for C<sub>20</sub>H<sub>23</sub>O<sub>2</sub>N<sub>4</sub>S<sub>2</sub>, [M+H]<sup>+</sup>: 429.1419; found: 429.1457.

**4-(((4-(*tert*-butyl)phenyl)thio)amino)-*N*-(4,6-dimethylpyrimidin-2-yl) benzenesulfonamide (5i)**

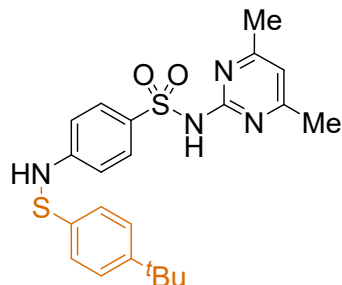

White solid; Yield: 29% (64.1 mg, *additive-free synthesis*); Mp: 172–174 °C; <sup>1</sup>H NMR (400 MHz, DMSO-*d*<sub>6</sub>) δ 11.37 (s, 1H), 8.55 (s, 1H), 7.85–7.81 (m, 2H), 7.33–7.29 (m, 2H), 7.10–7.08 (m, 4H), 6.71–6.68 (m, 1H), 2.21 (s, 6H), 1.19 (s, 9H); <sup>13</sup>C NMR (101 MHz, DMSO-*d*<sub>6</sub>) δ 167.3, 156.4, 151.7, 148.5, 136.6, 130.3, 130.1, 126.0, 122.8, 113.7, 113.3, 34.1, 31.0, 23.0; HRMS (ESI) calcd for C<sub>22</sub>H<sub>27</sub>O<sub>2</sub>N<sub>4</sub>S<sub>2</sub>, [M+H]<sup>+</sup>: 443.1575; found: 443.1565.

**4-(((4-(*tert*-butyl)phenyl)thio)amino)-*N*-(5-methoxypyrimidin-2-yl) benzenesulfonamide (5j)**

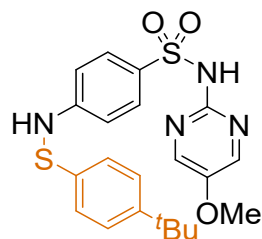

White solid; Yield: 61% (135.4 mg, *additive-free synthesis*), 45% (100.1 mg, *one-pot synthesis*); Mp: 130–131 °C; <sup>1</sup>H NMR (400 MHz, DMSO-*d*<sub>6</sub>) δ 11.24 (s, 1H), 8.57 (s, 1H), 8.26 (s, 2H), 7.80–7.78 (m, 2H), 7.34–7.31 (m, 2H), 7.11–7.08 (m, 4H), 3.76 (s, 3H), 1.19 (s, 9H); <sup>13</sup>C NMR (101 MHz, DMSO-*d*<sub>6</sub>) δ 151.8, 151.3, 149.5, 148.6, 144.6, 136.7, 130.5, 129.6, 126.1, 122.9, 113.7, 56.3, 34.2, 31.1; HRMS (ESI) calcd. for C<sub>21</sub>H<sub>25</sub>O<sub>3</sub>N<sub>4</sub>S<sub>2</sub> [M+H]<sup>+</sup>: 445.1368; found: 445.1394.

**4-(((4-fluorophenyl)thio)amino)-*N*-(5-methoxypyrimidin-2-yl) benzenesulfonamide (5k)**

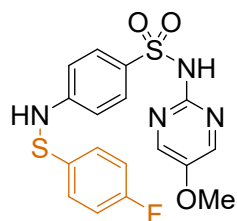

Yellow solid; Yield: 68% (138.0 mg, *additive-free synthesis*), 35% (71.1 mg, *one-pot synthesis*); Mp: 155–157 °C; <sup>1</sup>H NMR (400 MHz, DMSO-*d*<sub>6</sub>) δ 11.24 (s, 1H), 8.62 (s, 1H), 8.26 (s, 2H), 7.78 (d, *J* = 8.6 Hz, 2H), 7.24–7.16 (m, 4H), 7.08 (d, *J* = 8.8 Hz, 2H), 3.78 (s, 3H); <sup>13</sup>C NMR (101 MHz, DMSO-*d*<sub>6</sub>) δ 162.0, 159.5, 151.3, 149.4, 144.6, 135.6, 135.6, 130.8, 129.5, 125.2, 125.1, 116.4, 116.2, 113.7, 56.3; <sup>19</sup>F NMR (376 MHz, DMSO-*d*<sub>6</sub>) δ -116.9; HRMS (ESI) calcd for C<sub>17</sub>H<sub>16</sub>O<sub>3</sub>FN<sub>4</sub>S<sub>2</sub>, [M+H]<sup>+</sup>: 407.0648; found: 407.0686.

**4-(((4-(*tert*-butyl)phenyl)thio)amino)-*N*-(6-methoxypyridazin-3-yl) benzenesulfonamide (5l)**

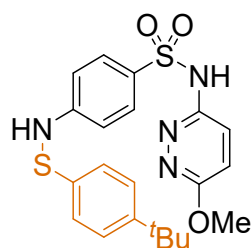

White solid; Yield: 85% (188.7 mg, *additive-free synthesis*), 66% (146.5 mg, *one-pot synthesis*); Mp: 142–144 °C; <sup>1</sup>H NMR (400 MHz, DMSO-*d*<sub>6</sub>) δ 12.61 (s, 1H), 8.50 (s, 1H), 7.66 (d, *J* = 8.8 Hz, 3H), 7.34–7.28 (m, 3H), 7.11–7.06 (m, 4H), 3.82 (s, 3H), 1.20 (s, 9H); <sup>13</sup>C NMR (101 MHz, DMSO-*d*<sub>6</sub>) δ 158.9, 152.7, 151.2, 148.6, 136.8, 132.4, 128.2, 126.1, 125.8, 124.4, 122.8, 114.0, 54.5, 34.2, 31.1; HRMS (ESI) calcd for C<sub>21</sub>H<sub>25</sub>O<sub>3</sub>N<sub>4</sub>S<sub>2</sub>, [M+H]<sup>+</sup>: 445.1368; found: 445.1394.

**4-(((4-fluorophenyl)thio)amino)-*N*-(6-methoxypyridazin-3-yl)benzenesulfonamide (5m)**

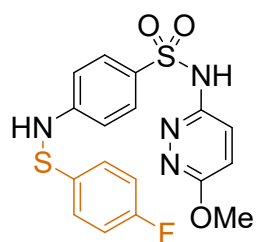

Colorless oil; Yield: 40% (81.2 mg, *additive-free synthesis*); <sup>1</sup>H NMR (400 MHz, DMSO-*d*<sub>6</sub>) δ 12.65 (s, 1H), 8.57 (s, 1H), 7.66 (d, *J* = 8.8 Hz, 3H), 7.30 (d, *J* = 9.8 Hz, 1H), 7.24–7.26 (m, 4H), 7.07 (d, *J* = 8.8 Hz, 2H), 3.83 (s, 3H); <sup>13</sup>C NMR (101 MHz, DMSO-*d*<sub>6</sub>) δ 162.0, 159.5, 152.7, 150.9, 135.7 (d, *J* = 2.8 Hz), 132.7, 128.2, 125.9, 125.2, 125.1, 116.4, 116.2, 114.1, 54.5; <sup>19</sup>F NMR (376 MHz, DMSO-*d*<sub>6</sub>) δ -117.0; HRMS (ESI) calcd for C<sub>17</sub>H<sub>16</sub>O<sub>3</sub>FN<sub>4</sub>S<sub>2</sub>, [M+H]<sup>+</sup>: 407.0648; found: 407.0645.

***N*-(5,6-dimethoxypyrimidin-4-yl)-4-(((4-fluorophenyl)thio)amino)benzenesulfonamide (5n)**

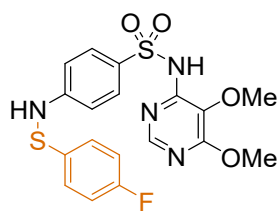

White solid; Yield: 70% (152.6 mg, *additive-free synthesis*), 60% (130.8 mg, *one-pot synthesis*); Mp: 158–160 °C; <sup>1</sup>H NMR (400 MHz, DMSO-*d*<sub>6</sub>) δ 10.93 (s, 1H), 8.65 (s, 1H), 8.10 (s, 1H), 7.82 (d, *J* = 8.9 Hz, 2H), 7.25–7.18 (m, 4H), 7.09 (d, *J* = 9.0 Hz, 2H), 3.89 (s, 3H), 3.66 (s, 3H); <sup>13</sup>C NMR (101 MHz, DMSO-*d*<sub>6</sub>) δ 162.0, 161.5, 159.5, 151.51, 150.7, 135.6, 135.5, 129.6, 127.0, 125.2, 125.1, 116.5, 116.2, 113.7, 60.2, 54.1; <sup>19</sup>F NMR (376 MHz, DMSO-*d*<sub>6</sub>) δ -117.0; HRMS (ESI) calcd for C<sub>18</sub>H<sub>18</sub>O<sub>4</sub>FN<sub>4</sub>S<sub>2</sub>, [M+H]<sup>+</sup>: 437.0754; found: 437.0761.

**4-(((4-(*tert*-butyl)phenyl)thio)amino)-*N*-(2,6-dimethoxypyrimidin-4-yl) benzenesulfonamide (5o)**

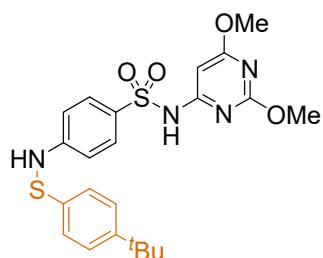

White solid; Yield: 69% (163.5 mg, *additive-free synthesis*), 57% (135.1 mg, *one-pot synthesis*); Mp: 170–172 °C; <sup>1</sup>H NMR (400 MHz, DMSO-*d*<sub>6</sub>) δ 11.35 (s, 1H), 8.65 (s, 1H), 7.75 (d, *J* = 9.1 Hz, 2H), 7.33 (dd, *J* = 8.5, 2.2 Hz, 2H), 7.13–7.09 (m, 4H), 5.93 (s, 1H), 3.77 (s, 3H), 3.71 (s, 3H), 1.20 (s, 9H); <sup>13</sup>C NMR (101 MHz, DMSO-*d*<sub>6</sub>) δ 171.7, 164.4, 160.1, 152.2, 148.6, 136.5, 129.6, 129.2, 126.1, 122.9, 114.0, 84.4, 54.5, 53.8, 34.2, 31.0; HRMS (ESI) calcd. for C<sub>22</sub>H<sub>27</sub>O<sub>4</sub>N<sub>4</sub>S<sub>2</sub> [M+H]<sup>+</sup>: 475.1474; found: 475.1470.

***N*-(2,6-dimethoxypyrimidin-4-yl)-4-(((4-fluorophenyl)thio)amino) benzenesulfonamide (5p)**

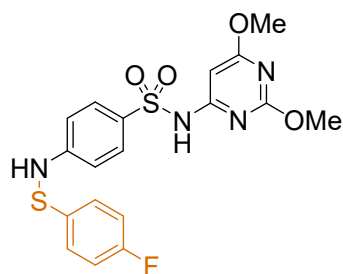

White solid; Yield: 61% (132.9 mg, *additive-free synthesis*), 43% (93.7 mg, *one-pot synthesis*); Mp: 165–167 °C; <sup>1</sup>H NMR (400 MHz, DMSO-*d*<sub>6</sub>) δ 11.36 (s, 1H), 8.71 (s, 1H), 7.76 (d, *J* = 8.8 Hz, 2H), 7.24–7.16 (m, 4H), 7.14–7.10 (m, 2H), 5.92 (s, 1H), 3.78 (s, 3H), 3.72 (s, 3H); <sup>13</sup>C NMR (101 MHz, DMSO-*d*<sub>6</sub>) δ 171.66, 164.37, 161.97, 160.09, 159.57, 151.9, 135.41 (d, *J* = 3.2 Hz), 129.9, 129.3, 125.3, 125.2, 116.4, 116.2, 114.1, 84.4, 54.5, 53.8; <sup>19</sup>F NMR (376 MHz, DMSO-*d*<sub>6</sub>) δ -116.8; HRMS (ESI) calcd for C<sub>18</sub>H<sub>18</sub>O<sub>4</sub>FN<sub>4</sub>S<sub>2</sub>, [M+H]<sup>+</sup>: 437.0754; found: 437.0761.

#### 4-methyl-*N*-(4-sulfamoylphenyl)benzenesulfonamide (6)

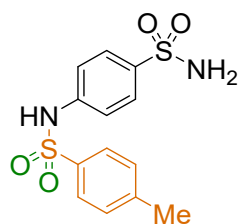

White solid; Yield: 91% (88.9 mg); Mp: 133–135 °C; <sup>1</sup>H NMR (400 MHz, DMSO-*d*<sub>6</sub>) δ 10.83 (s, 1H), 7.76–7.70(m, 4H), 7.36 (d, *J* = 8.0 Hz, 2H), 7.28 (d, *J* = 9.1 Hz, 4H), 2.30 (s, 3H); <sup>13</sup>C NMR (101 MHz, DMSO-*d*<sub>6</sub>) δ 143.9, 141.1, 138.8, 136.4, 130.0, 127.3, 126.9, 118.4, 21.1; HRMS (ESI) calcd for C<sub>13</sub>H<sub>14</sub>O<sub>4</sub>N<sub>2</sub>S<sub>2</sub>, [M+H]<sup>+</sup>: 327.0473; found: 327.2471.

#### 4-fluoro-*N*-(4-sulfamoylphenyl)benzenesulfonamide (7)

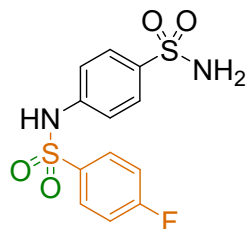

White solid; Yield: 87% (86.1 mg); Mp: 149–151 °C; <sup>1</sup>H NMR (400 MHz, DMSO-*d*<sub>6</sub>) δ 10.90 (s, 1H), 7.92–7.88 (m, 2H), 7.70–7.68 (m, 2H), 7.45–7.40 (m, 2H), 7.27–7.24 (m, 4H); <sup>13</sup>C NMR (101 MHz, DMSO-*d*<sub>6</sub>) δ 164.6 (d, *J* = 252.3 Hz), 140.7, 139.1, 135.5 (d, *J* = 3.2 Hz), 129.9 (d, *J* = 9.6 Hz), 127.3, 118.7, 116.8 (d, *J* = 23.0 Hz); <sup>19</sup>F NMR (376 MHz, DMSO-*d*<sub>6</sub>) δ -105.0; HRMS (ESI) calcd for C<sub>12</sub>H<sub>11</sub>O<sub>4</sub>FN<sub>2</sub>S<sub>2</sub>, [M+H]<sup>+</sup>: 331.0223; found: 331.0208.

#### *N*-phenyl-4-((*p*-tolylthio)amino)benzenesulfonamide (8)

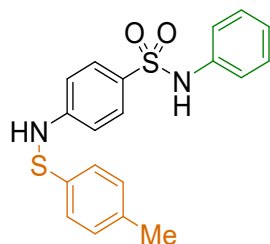

White solid; Yield: 53% (58.8 mg); Mp: 147–149 °C; <sup>1</sup>H NMR (400 MHz, DMSO-*d*<sub>6</sub>) δ 10.06 (s, 1H), 8.55 (s, 1H), 7.57 (d, *J* = 8.7 Hz, 2H), 7.21–7.17 (m, 2H), 7.12 (d, *J* = 7.9 Hz, 2H), 7.06–6.96 (m, 7H), 2.22 (s, 3H); <sup>13</sup>C NMR (101 MHz, DMSO-*d*<sub>6</sub>) δ 151.7, 138.1, 136.4, 135.3, 129.8, 129.43, 129.1, 128.6, 123.6, 123.1, 119.6, 114.1, 20.5; HRMS (ESI) calcd for C<sub>19</sub>H<sub>18</sub>O<sub>2</sub>N<sub>2</sub>S<sub>2</sub>, [M+H]<sup>+</sup>: 371.0888; found: 371.0873.

#### 4-(benzyl(*p*-tolylthio)amino)benzenesulfonamide (9)

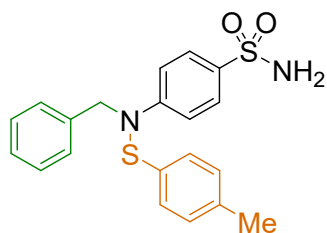

White solid; Yield: 56% (107.5 mg); Mp: 138–140 °C;  $^1\text{H}$  NMR (400 MHz, DMSO- $d_6$ )  $\delta$  7.70 (d,  $J = 9.0$  Hz, 2H), 7.37–7.26 (m, 7H), 7.21–7.18 (m, 4H), 7.12 (d,  $J = 8.2$  Hz, 2H), 5.10 (s, 2H), 2.27 (s, 3H);  $^{13}\text{C}$  NMR (101 MHz, DMSO- $d_6$ )  $\delta$  151.4, 137.4, 136.1, 134.8, 134.7, 130.1, 128.7, 127.3, 126.5, 123.7, 114.9, 59.6, 20.6; HRMS (ESI) calcd for  $\text{C}_{20}\text{H}_{20}\text{O}_2\text{N}_2\text{S}_2$ ,  $[\text{M}+\text{H}]^+$ : 385.1044; found: 385.1025.

#### *N*-benzyl-4-(benzyl(*p*-tolylthio)amino)benzenesulfonamide (9')

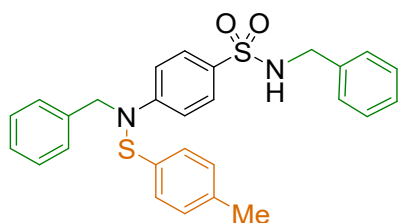

White solid; Yield: 22% (52.1 mg); Mp: 153–155 °C;  $^1\text{H}$  NMR (400 MHz, DMSO- $d_6$ )  $\delta$  7.94 (t,  $J = 6.3$  Hz, 1H), 7.67–7.59 (m, 2H), 7.36 (dd,  $J = 7.9, 6.6$  Hz, 2H), 7.32–7.16 (m, 12H), 7.15–7.09 (m, 2H), 5.08 (s, 2H), 3.95 (d,  $J = 6.3$  Hz, 2H), 2.28 (s, 3H).  $^{13}\text{C}$  NMR (101 MHz, DMSO- $d_6$ )  $\delta$  151.9, 137.8, 137.3, 136.1, 134.6, 131.1, 130.1, 128.7, 128.1, 127.5, 127.3, 127.0, 126.5, 123.7, 115.0, 59.5, 46.1, 20.6. HRMS (ESI) calcd for  $\text{C}_{27}\text{H}_{27}\text{O}_2\text{N}_2\text{S}_2$ ,  $[\text{M}+\text{H}]^+$ : 475.1514; found: 475.1528.

#### 4-(methyl(*p*-tolylthio)amino)benzenesulfonamide (10)

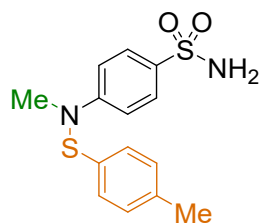

White solid; Yield: 72% (110.9 mg); Mp: 162–163 °C;  $^1\text{H}$  NMR (400 MHz, DMSO- $d_6$ )  $\delta$  7.74 (d,  $J = 9.0$  Hz, 2H), 7.30 (dd,  $J = 7.0, 2.1$  Hz, 2H), 7.20–7.15 (m, 4H), 7.03 (dd,  $J = 6.4, 2.0$  Hz, 2H), 3.49 (s, 3H), 2.24 (s, 3H);  $^{13}\text{C}$  NMR (101 MHz, DMSO- $d_6$ )  $\delta$  152.1, 136.0, 134.8, 134.6, 130.1, 127.2, 123.8, 114.5, 44.9, 20.6; HRMS (ESI) calcd for  $\text{C}_{14}\text{H}_{16}\text{O}_2\text{N}_2\text{S}_2$ ,  $[\text{M}+\text{H}]^+$ : 309.0731; found: 309.0721.



**4-(methyl(*p*-tolylthio)amino)-*N*-(pyrimidin-2-yl)benzenesulfonamide (11)**

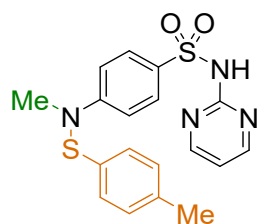

White solid; Yield: 61% (117.7 mg); Mp: 162–164 °C; <sup>1</sup>H NMR (400 MHz, DMSO-*d*<sub>6</sub>) δ 11.55 (s, 1H), 8.48(dd, *J* = 4.8, 1.8 Hz, 2H), 7.85 (dd, *J* = 8.8, 2.0 Hz, 2H), 7.27 (dd, *J* = 8.9, 2.0 Hz, 2H), 7.15 (d, *J* = 7.9 Hz, 2H), 7.09–6.98 (m, 3H), 3.47 (s, 3H), 2.24 (s, 3H); <sup>13</sup>C NMR (101 MHz, DMSO-*d*<sub>6</sub>) δ 158.3, 157.0, 153.0, 136.1, 134.5, 130.0, 129.3, 127.8, 123.9, 115.8, 114.3, 44.9, 20.5; HRMS (ESI) calcd for C<sub>18</sub>H<sub>18</sub>O<sub>2</sub>N<sub>4</sub>S<sub>2</sub>, [M+H]<sup>+</sup>: 387.0949; found: 387.0960.

**Table S1** Crystal data and structure refinement for **3a**.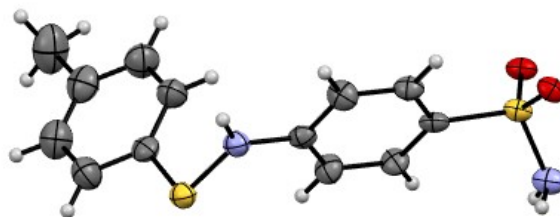

---

|                                             |                                                                              |
|---------------------------------------------|------------------------------------------------------------------------------|
| CCDC number                                 | 2304488                                                                      |
| Empirical formula                           | C <sub>13</sub> H <sub>14</sub> N <sub>2</sub> O <sub>2</sub> S <sub>2</sub> |
| Formula weight                              | 294.38                                                                       |
| Temperature/K                               | 150.00(10)                                                                   |
| Crystal system                              | orthorhombic                                                                 |
| Space group                                 | P2 <sub>1</sub> 2 <sub>1</sub> 2 <sub>1</sub>                                |
| a/Å                                         | 4.9499(3)                                                                    |
| b/Å                                         | 13.8952(10)                                                                  |
| c/Å                                         | 20.1686(16)                                                                  |
| α/°                                         | 90                                                                           |
| β/°                                         | 90                                                                           |
| γ/°                                         | 90                                                                           |
| Volume/Å <sup>3</sup>                       | 1387.21(17)                                                                  |
| Z                                           | 4                                                                            |
| ρ <sub>calc</sub> /cm <sup>3</sup>          | 1.410                                                                        |
| μ/mm <sup>-1</sup>                          | 3.481                                                                        |
| F(000)                                      | 616.0                                                                        |
| Crystal size/mm <sup>3</sup>                | 0.15 × 0.12 × 0.11                                                           |
| Radiation                                   | Cu Kα (λ = 1.54184)                                                          |
| 2θ range for data collection/°              | 8.768 to 133.192                                                             |
| Index ranges                                | -5 ≤ h ≤ 5, -9 ≤ k ≤ 16, -24 ≤ l ≤ 22                                        |
| Reflections collected                       | 2903                                                                         |
| Independent reflections                     | 2049 [R <sub>int</sub> = 0.0461, R <sub>sigma</sub> = 0.0629]                |
| Data/restraints/parameters                  | 2049/133/173                                                                 |
| Goodness-of-fit on F <sup>2</sup>           | 1.069                                                                        |
| Final R indexes [I ≥ 2σ (I)]                | R <sub>1</sub> = 0.1028, wR <sub>2</sub> = 0.2746                            |
| Final R indexes [all data]                  | R <sub>1</sub> = 0.1147, wR <sub>2</sub> = 0.2893                            |
| Largest diff. peak/hole / e Å <sup>-3</sup> | 0.55/-0.52                                                                   |

---

## 4. Stability experiment

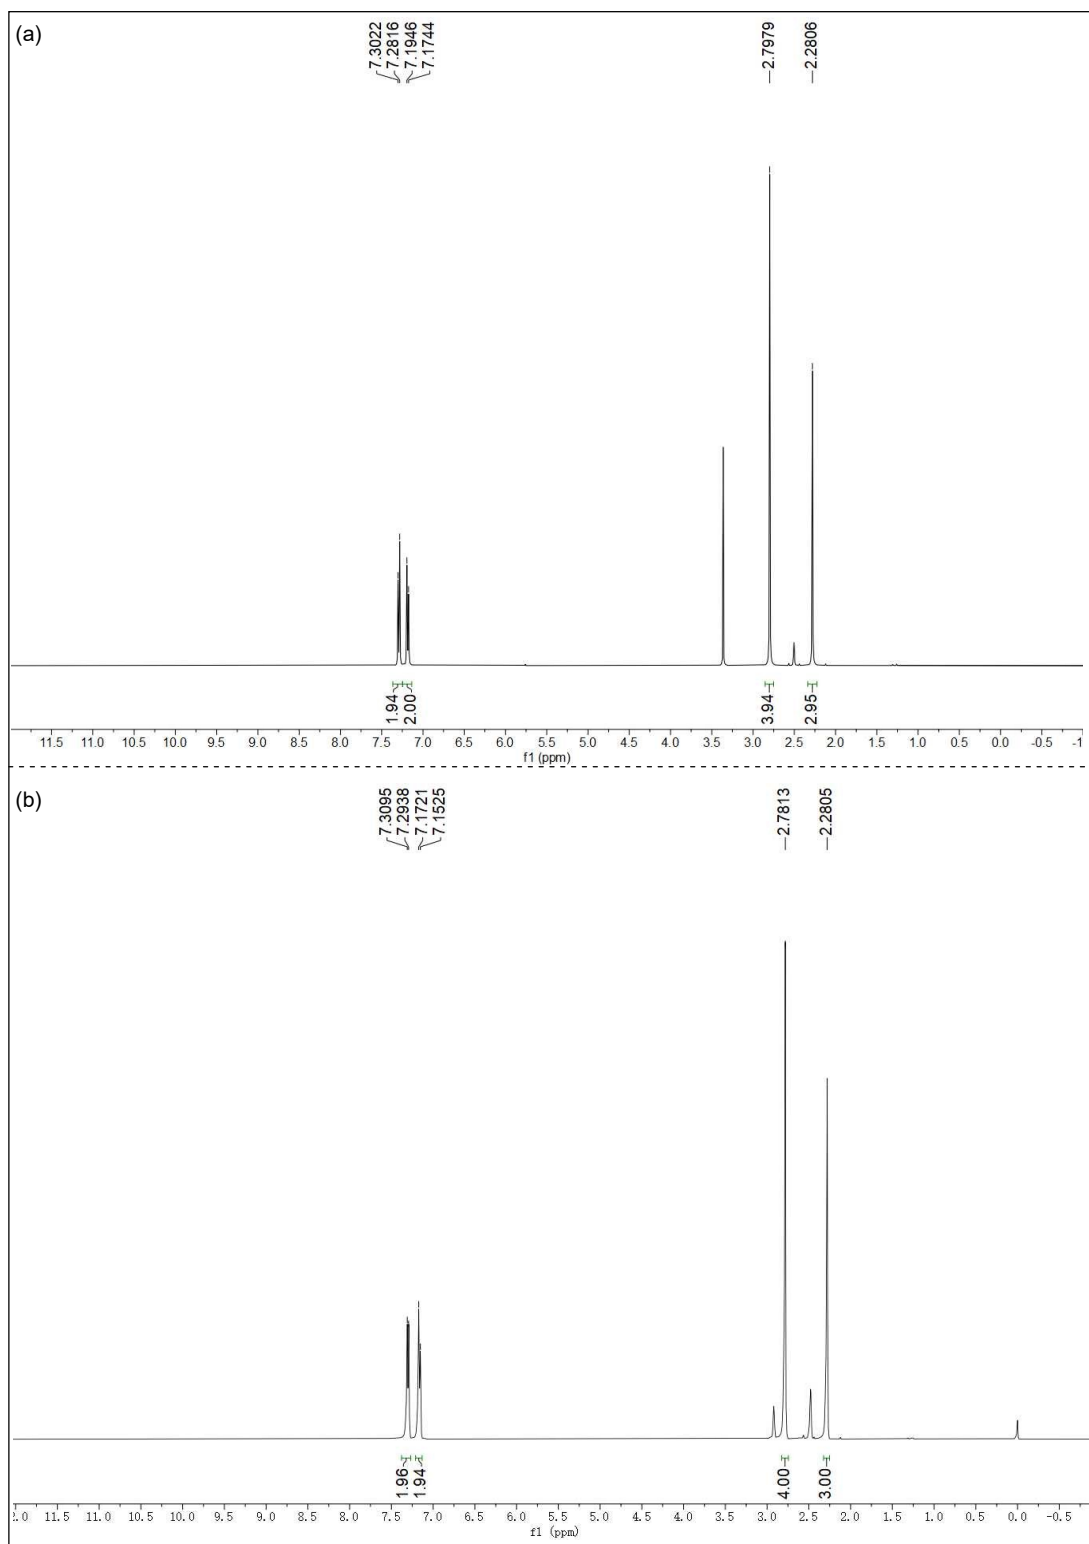

**Fig. S4**  $^1\text{H}$  NMR (400 MHz,  $\text{DMSO-}d_6$ ) spectra of thiosuccinimide **Su-2a** measured at different temperatures. (a) Performed at room temperature. (b) Performed at 100 °C.

## 5. References

- 1 T. Keshari , R. Kapoor and L. D. S. Yadav, *Synlett*, 2016, **27**, 1878–1882.
- 2 Y. Li, Y. Wang, F. Fang, Y. Zhang, C. Li, T. Yu, Q. Chen, J. Wang and H. Liu, *Org. Lett.*, 2023, **25**, 6018–6023.
- 3 A. Kesavan, A. K. Sahu and P. Anbarasan, *Org. Lett.*, 2023, **25**, 4765–4769.
- 4 S. Kanikarapu, M. P. Gogoi, S. Dutta and A. K. Sahoo, *Org. Lett.*, 2022, **24**, 8289–8294.
- 5 J. Grover, G. Prakash, C. Teja, G. K. Lahiri and D. Maiti, *Green Chem.*, 2023, **25**, 3431–3436.
- 6 G. S. Kumar, J. Bhattacharjee, K. Kumari, S. Moorthy, A. Bandyopadhyay, Saurabh K. Singh and T. K. Panda, *Polyhedron*, 2022, **219**, 115784.

## 6. NMR spectra

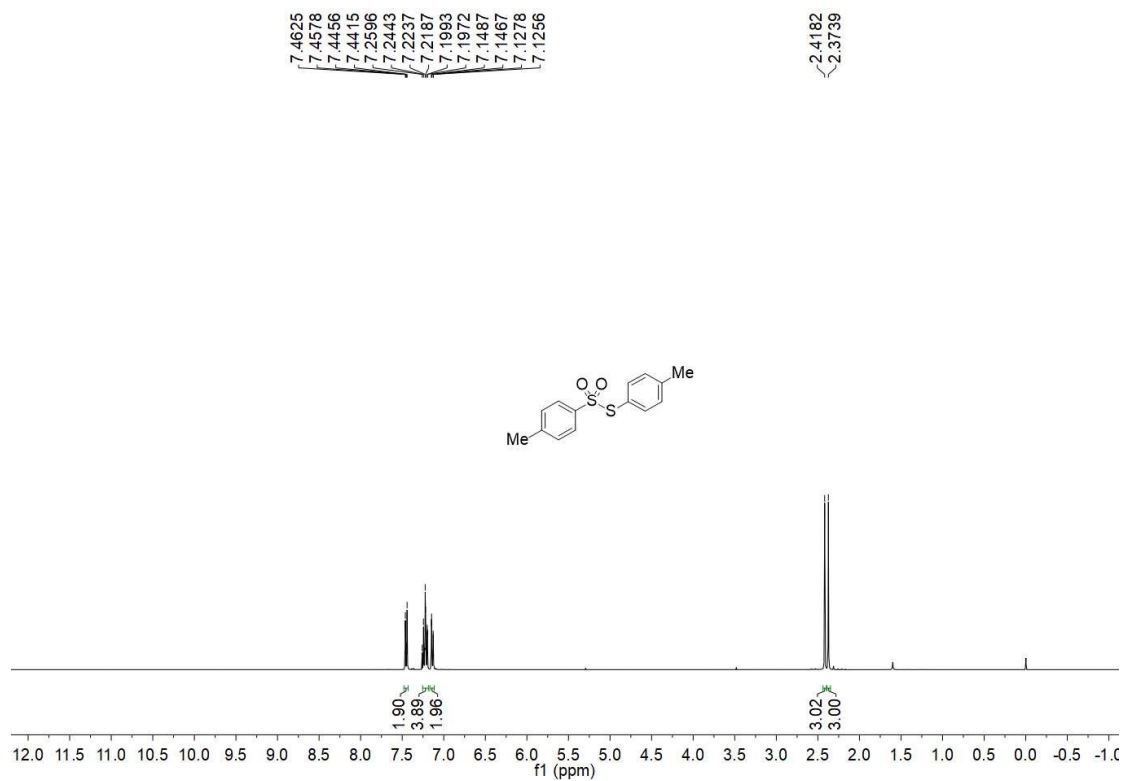

<sup>1</sup>H NMR (400 MHz, CDCl<sub>3</sub>) spectrum of Compound Ts-2a

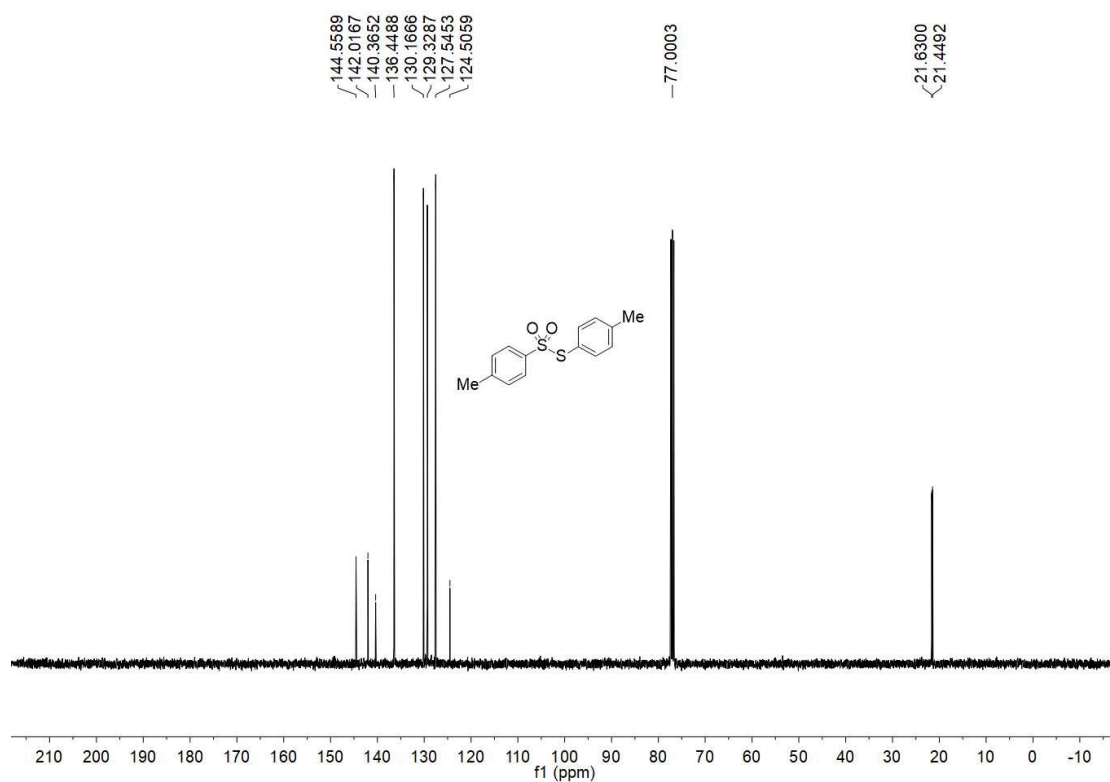

<sup>13</sup>C NMR (101 MHz, CDCl<sub>3</sub>) spectrum of Compound Ts-2a

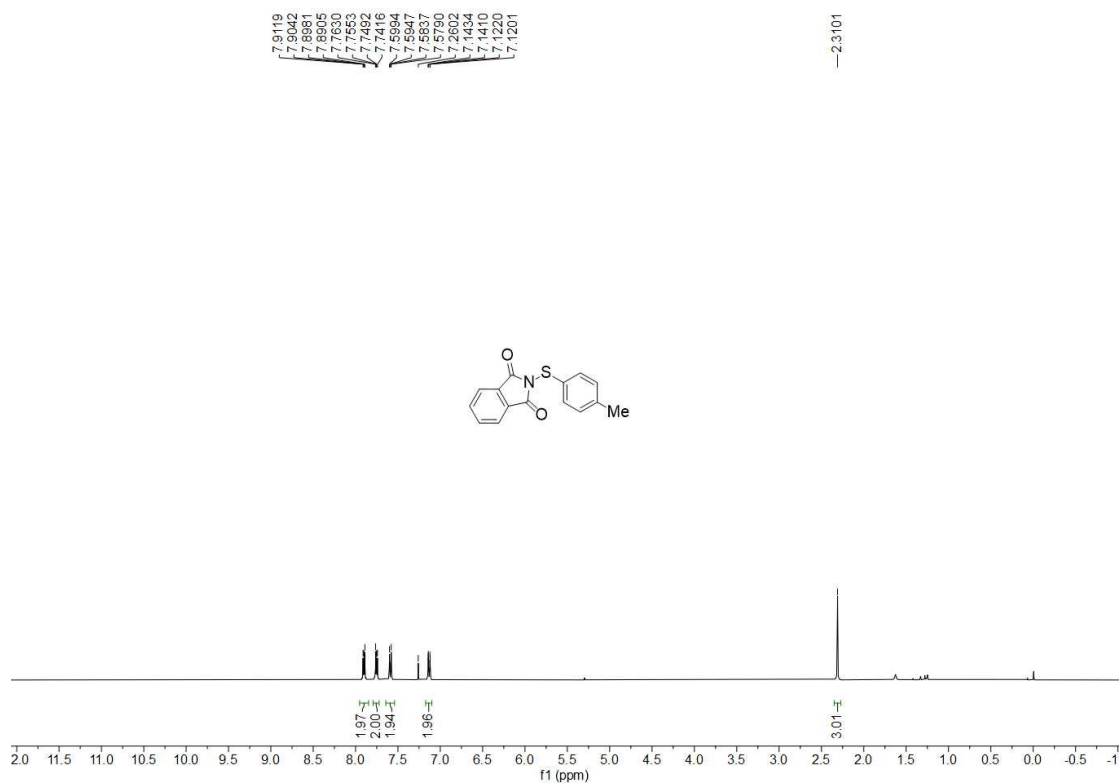

<sup>1</sup>H NMR (400 MHz, CDCl<sub>3</sub>) spectrum of Compound **Phth-2a**

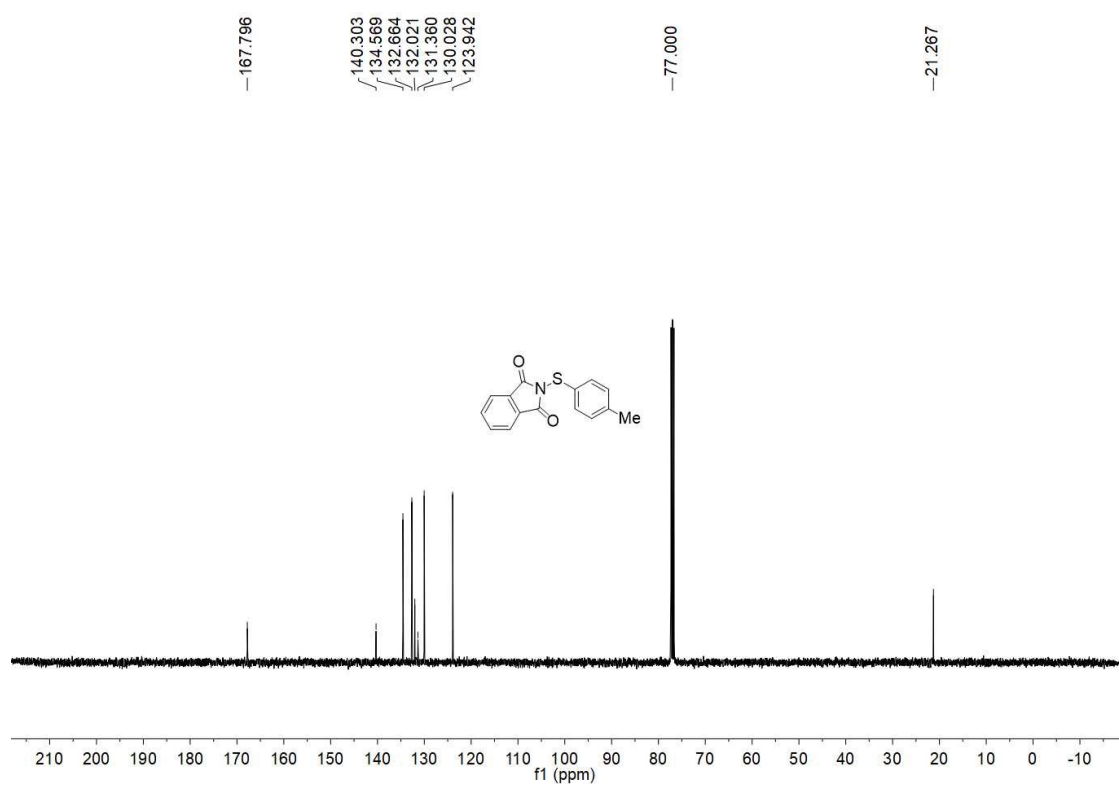

<sup>13</sup>C NMR (101 MHz, CDCl<sub>3</sub>) spectrum of Compound **Phth-2a**

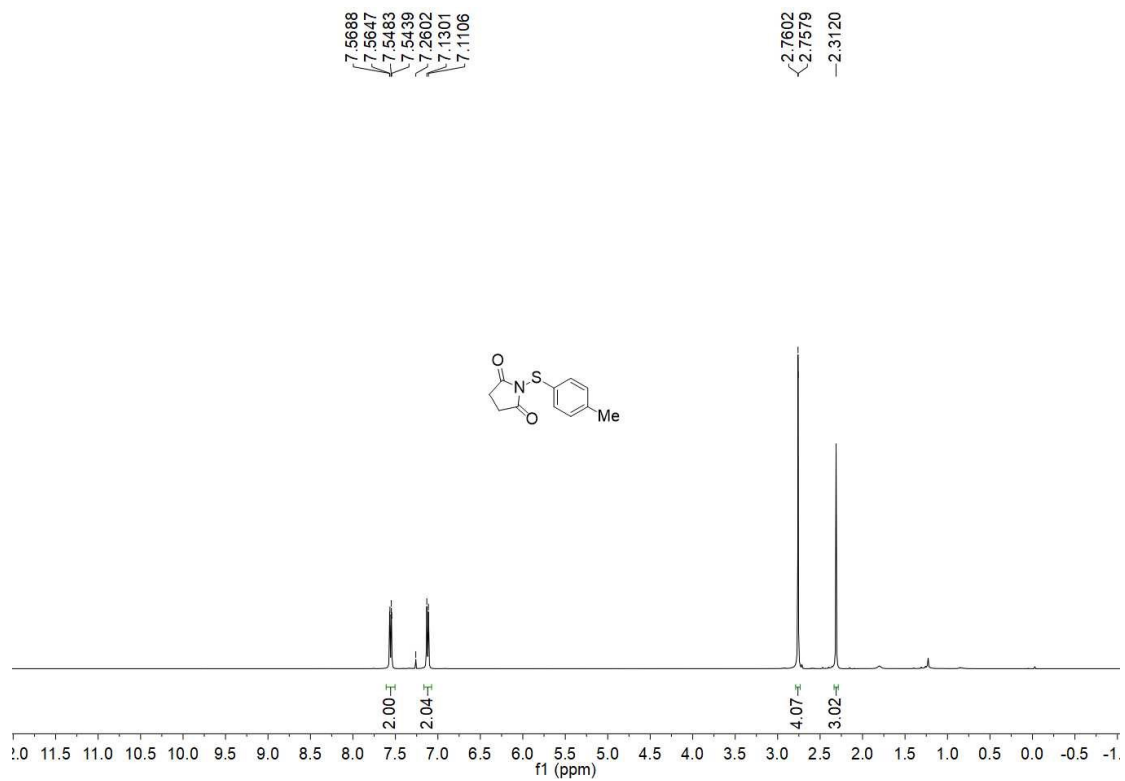

<sup>1</sup>H NMR (400 MHz, CDCl<sub>3</sub>) spectrum of Compound Su-2a

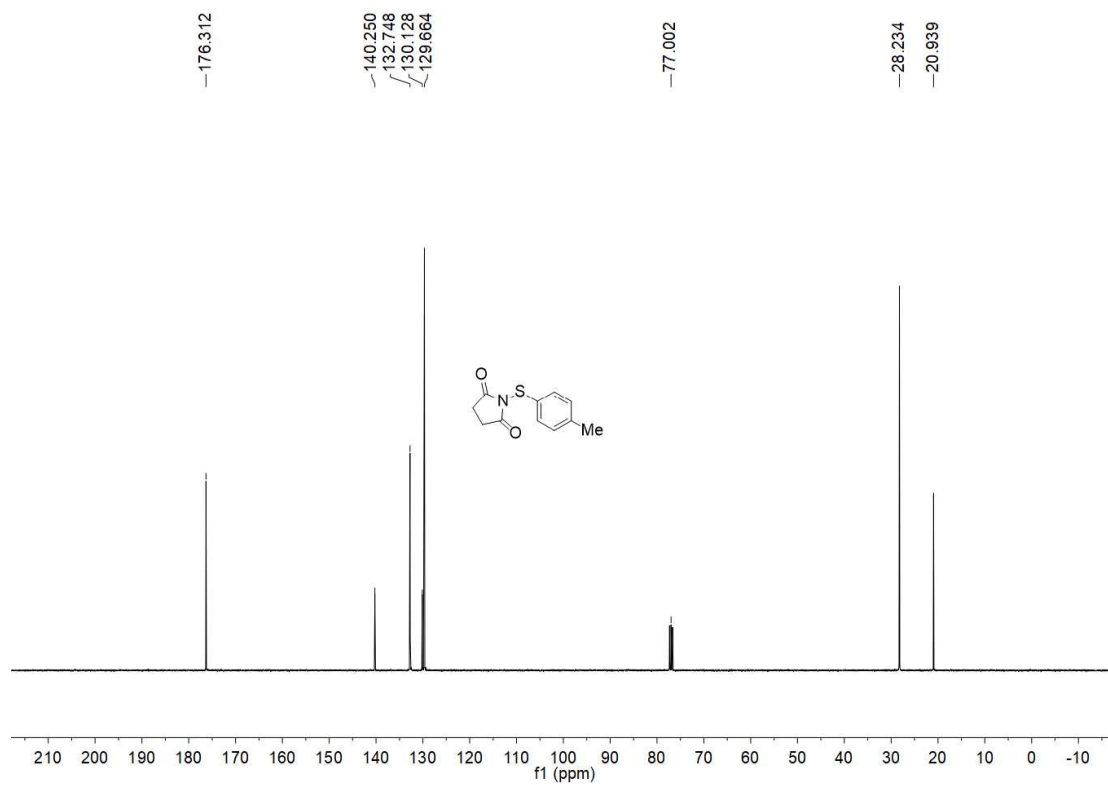

<sup>13</sup>C NMR (101 MHz, CDCl<sub>3</sub>) spectrum of Compound Su-2a

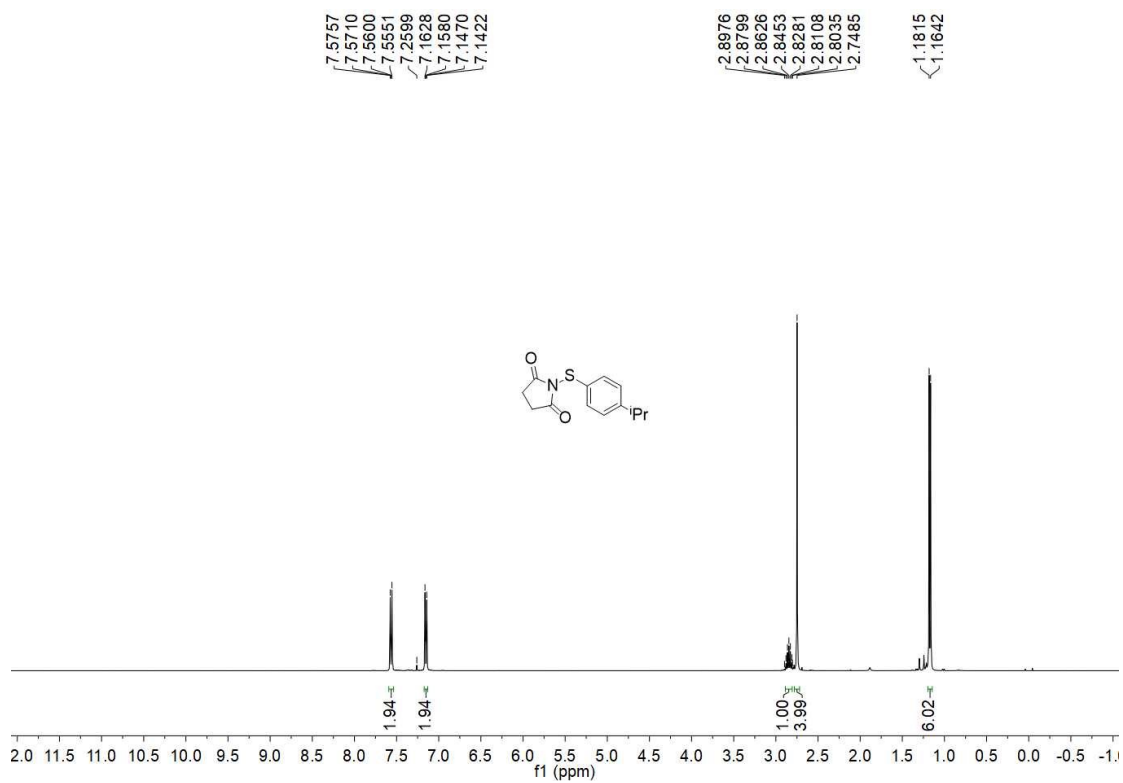

<sup>1</sup>H NMR (400 MHz, CDCl<sub>3</sub>) spectrum of Compound Su-2b

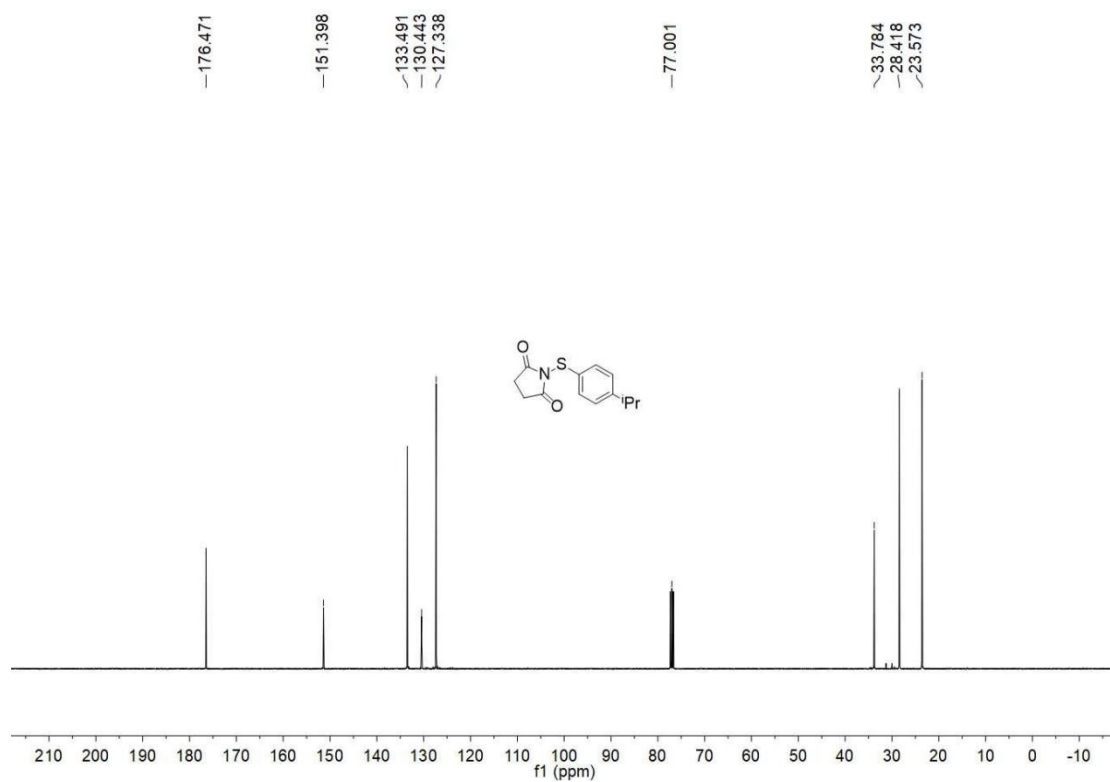

<sup>13</sup>C NMR (101 MHz, CDCl<sub>3</sub>) spectrum of Compound Su-2b



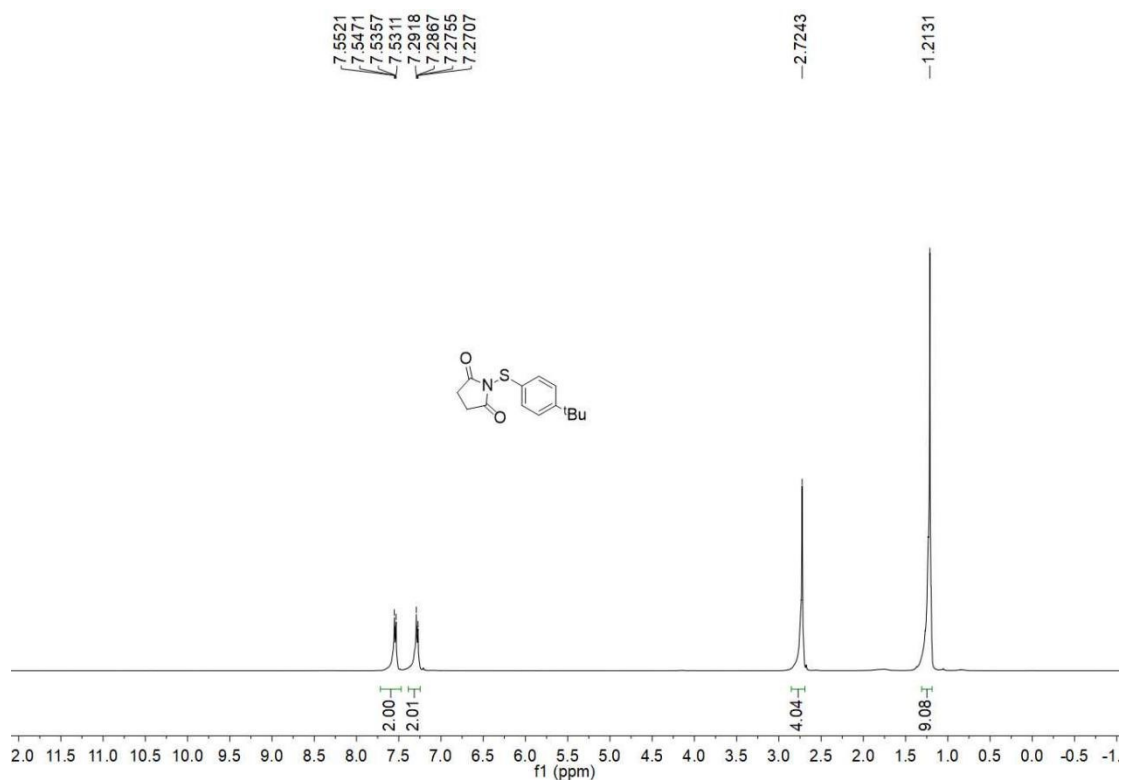

<sup>1</sup>H NMR (400 MHz, CDCl<sub>3</sub>) spectrum of Compound Su-2c

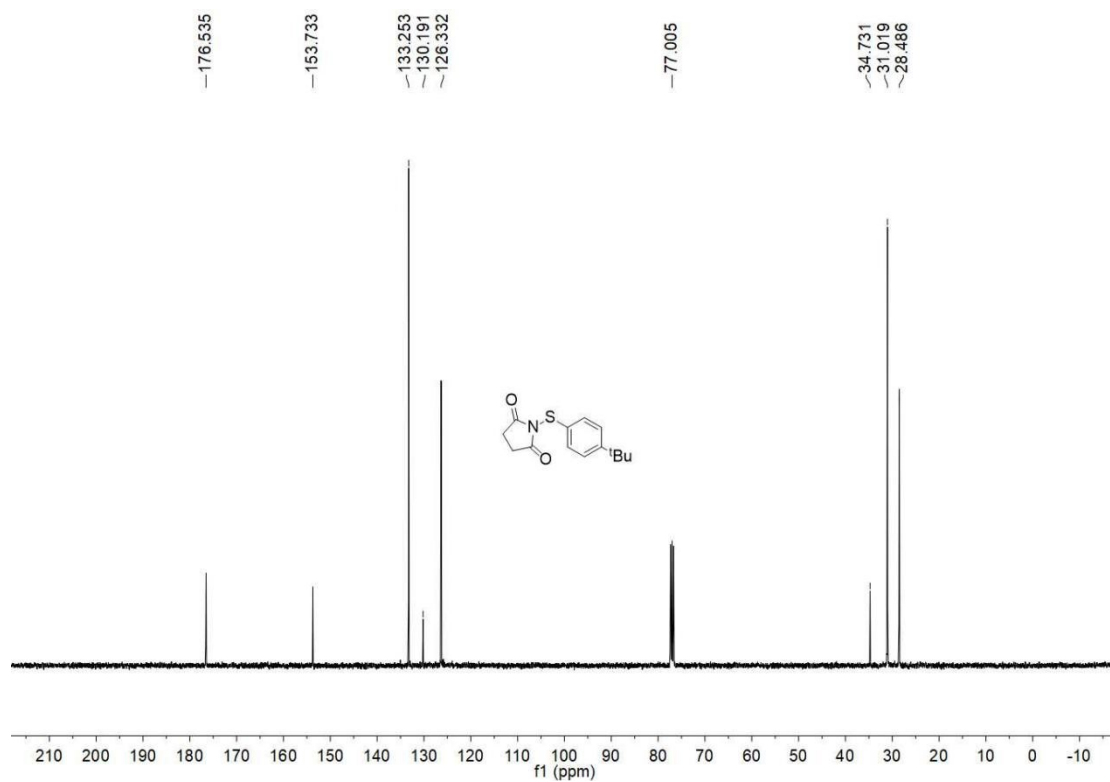

<sup>13</sup>C NMR (101 MHz, CDCl<sub>3</sub>) spectrum of Compound Su-2c

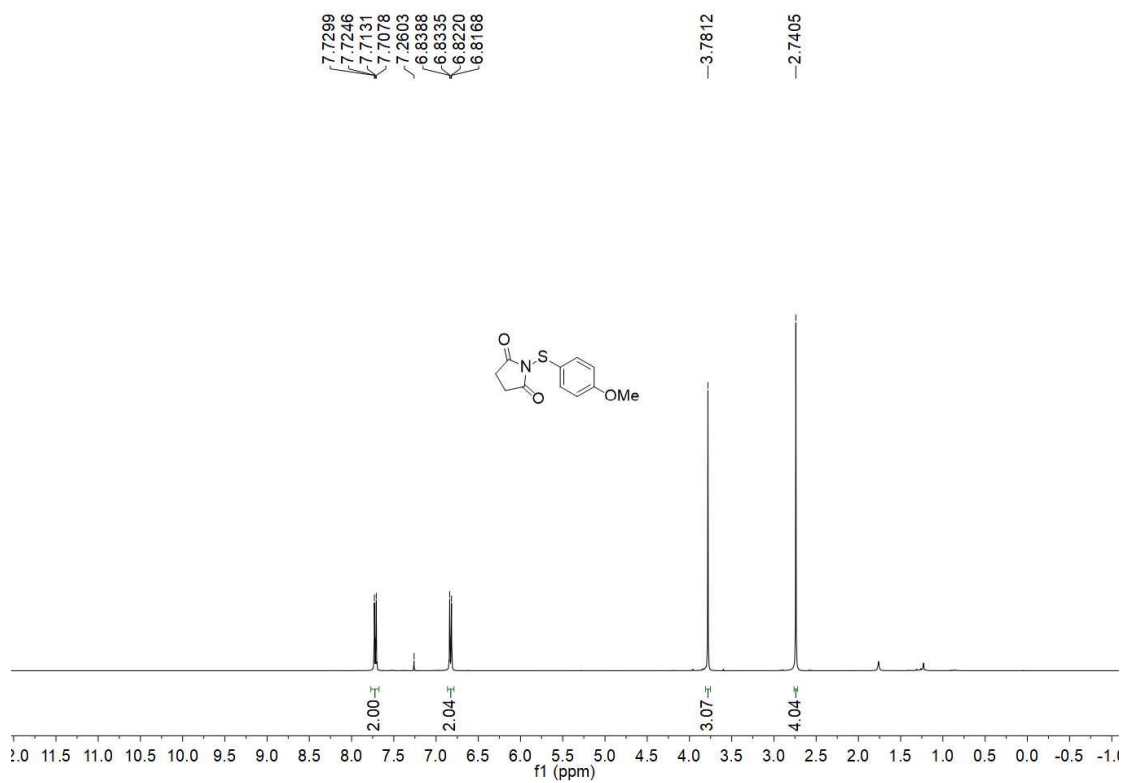

$^1\text{H}$  NMR (400 MHz,  $\text{CDCl}_3$ ) spectrum of Compound **Su-2d**

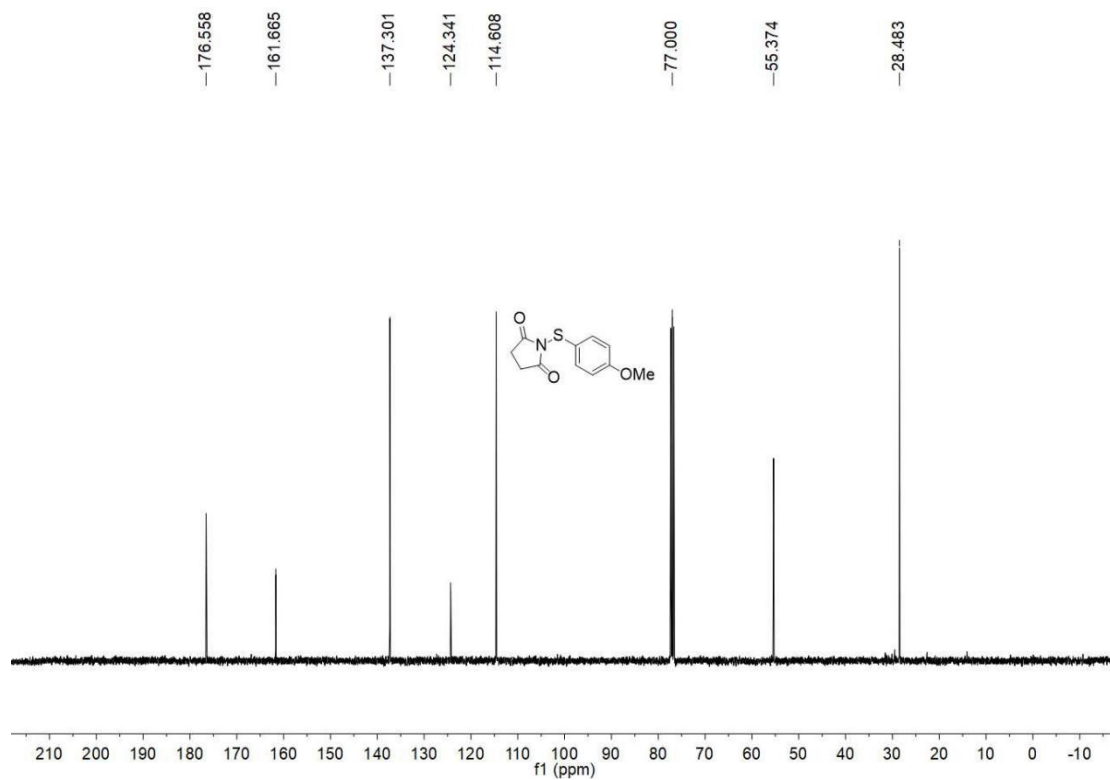

$^{13}\text{C}$  NMR (101 MHz,  $\text{CDCl}_3$ ) spectrum of Compound **Su-2d**

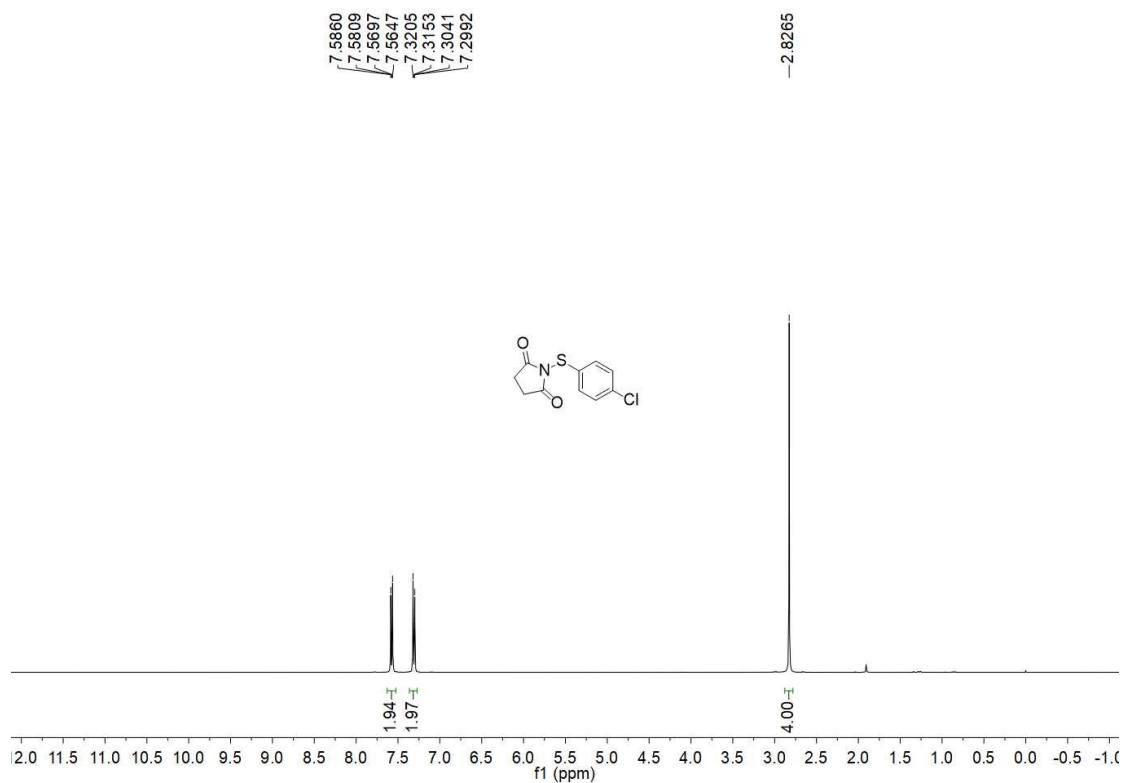

<sup>1</sup>H NMR (400 MHz, CDCl<sub>3</sub>) spectrum of Compound Su-2e

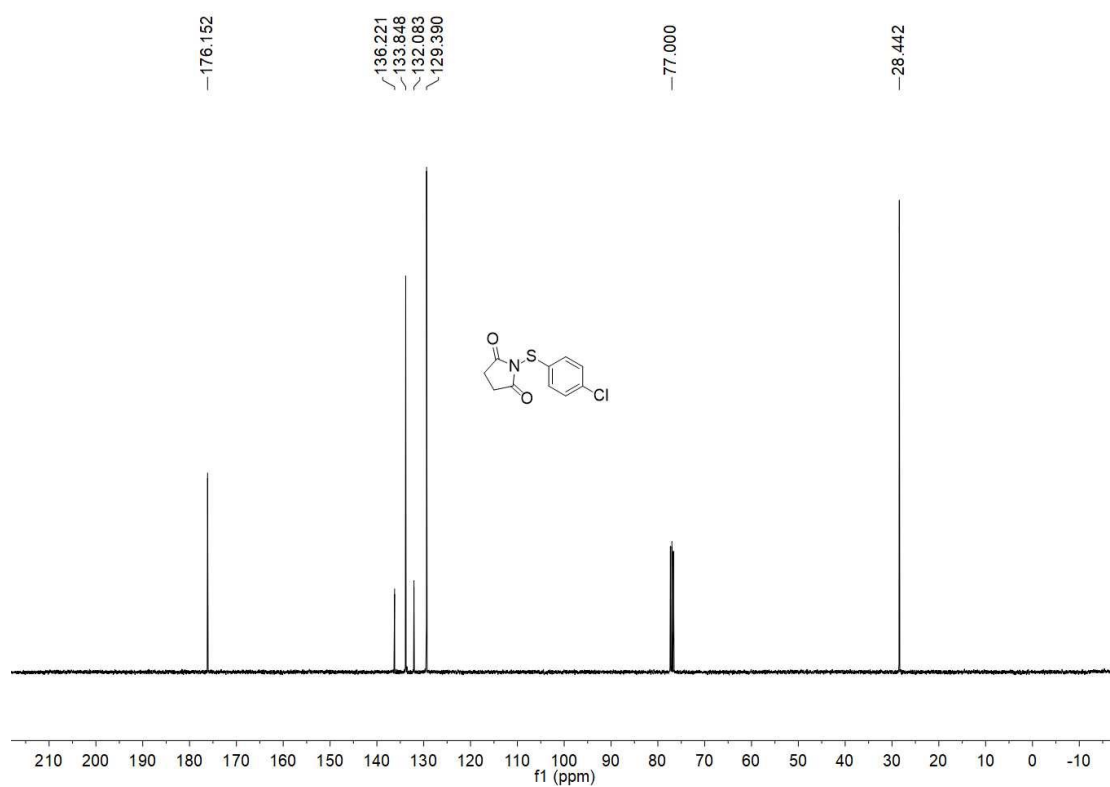

<sup>13</sup>C NMR (101 MHz, CDCl<sub>3</sub>) spectrum of Compound Su-2e

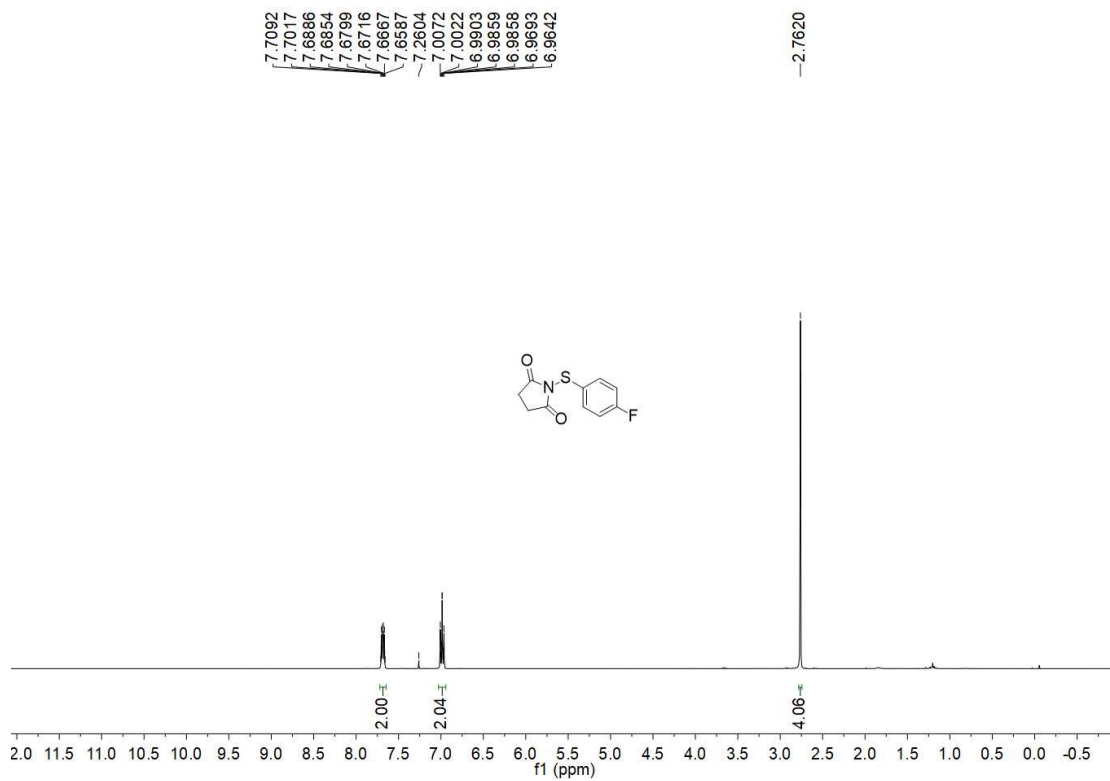

<sup>1</sup>H NMR (400 MHz, CDCl<sub>3</sub>) spectrum of Compound **Su-2f**

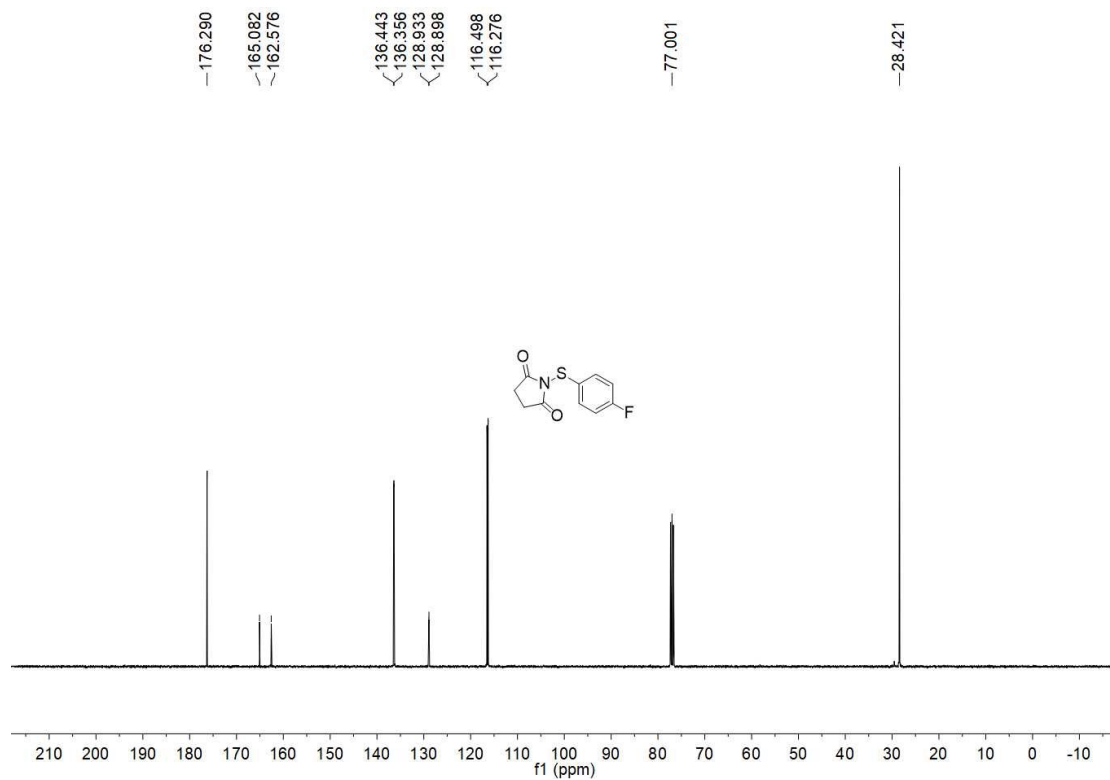

<sup>13</sup>C NMR (101 MHz, CDCl<sub>3</sub>) spectrum of Compound **Su-2f**

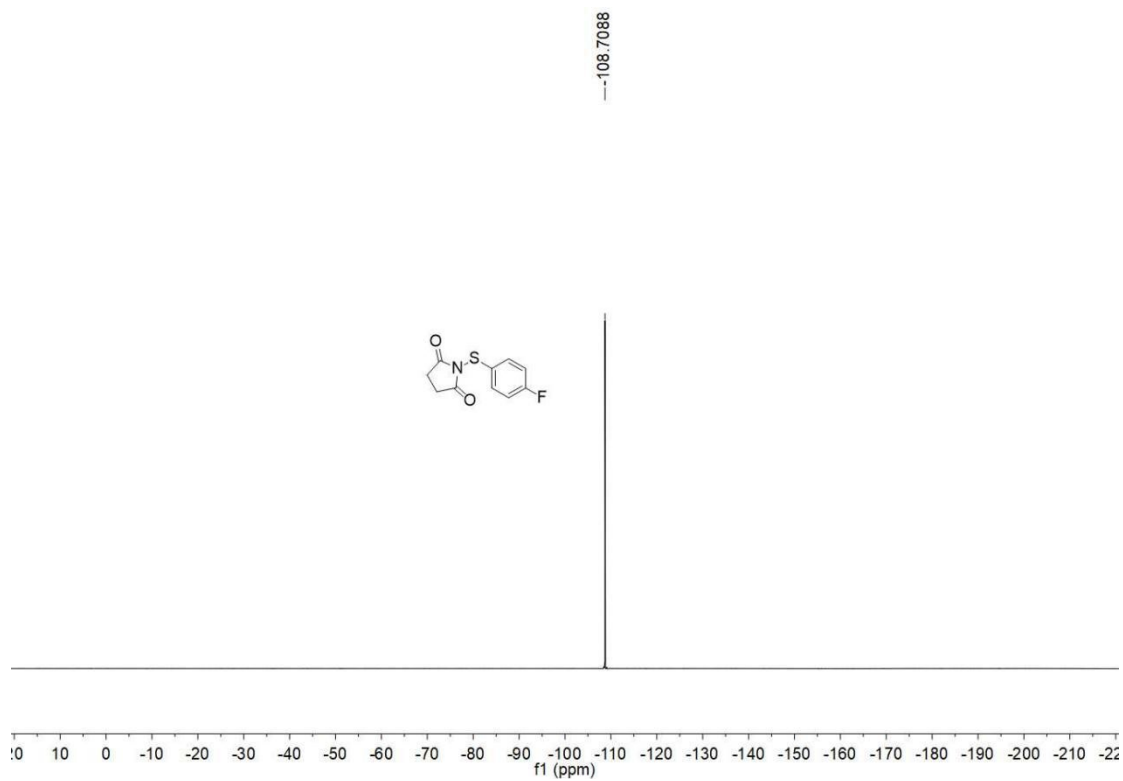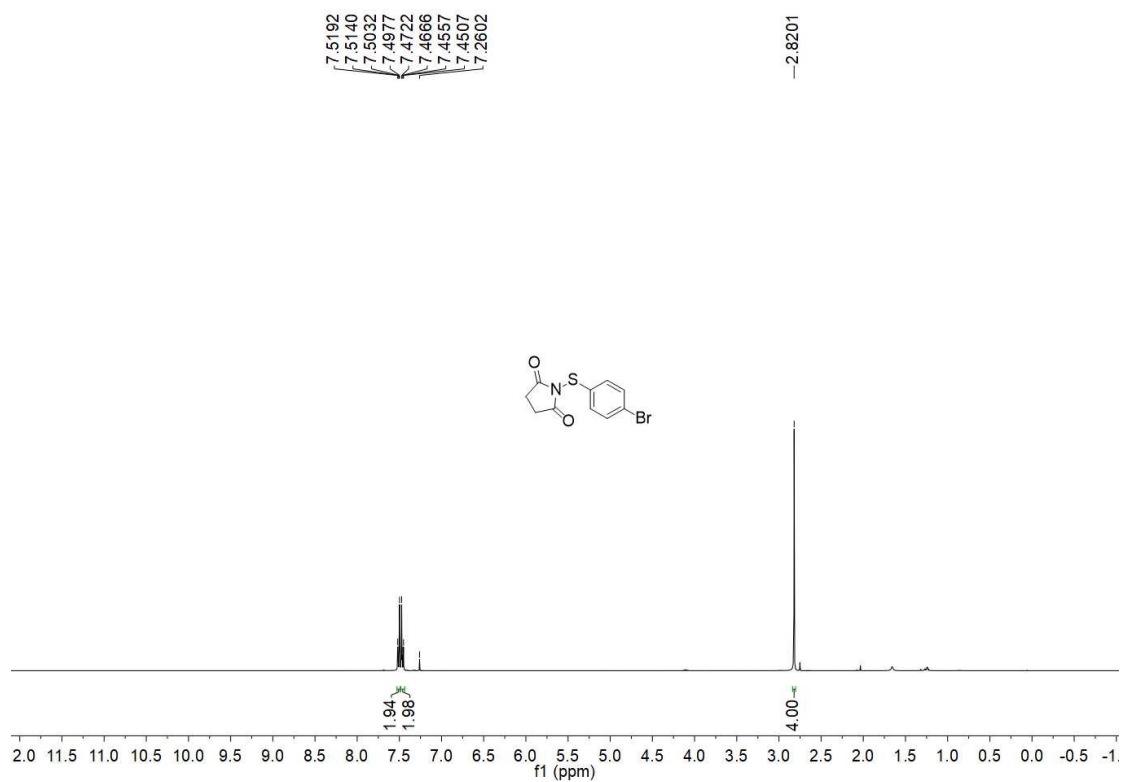

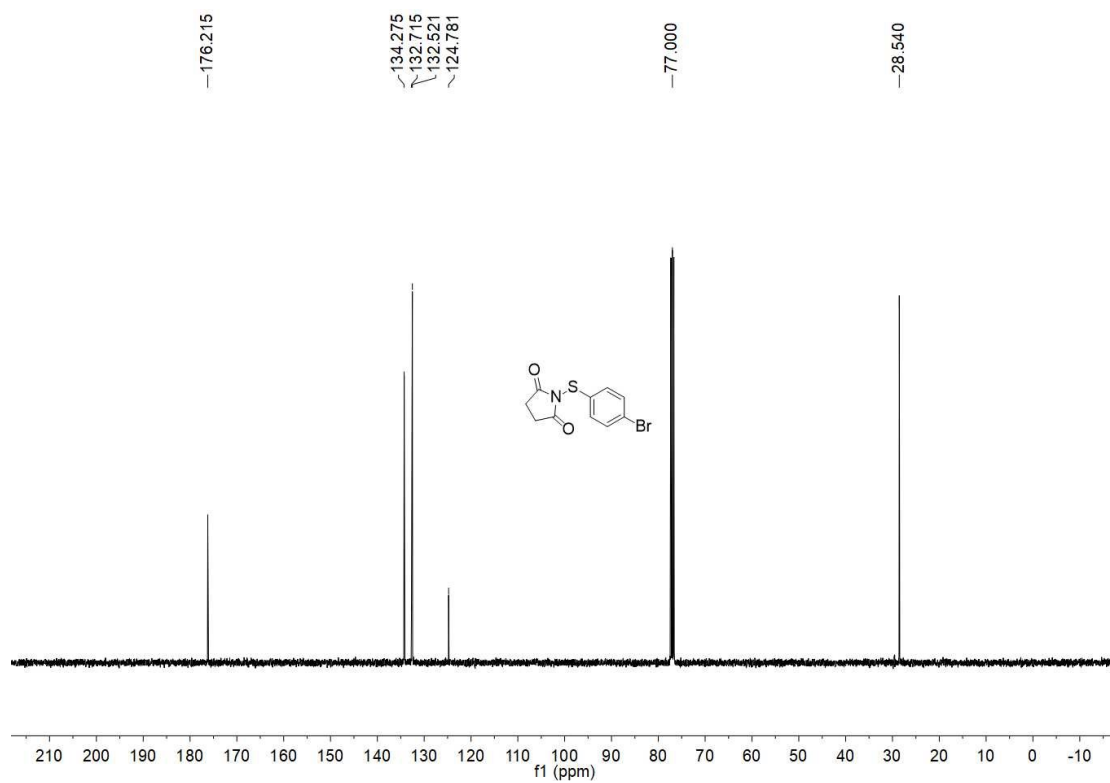

<sup>13</sup>C NMR (101 MHz, CDCl<sub>3</sub>) spectrum of Compound Su-2g

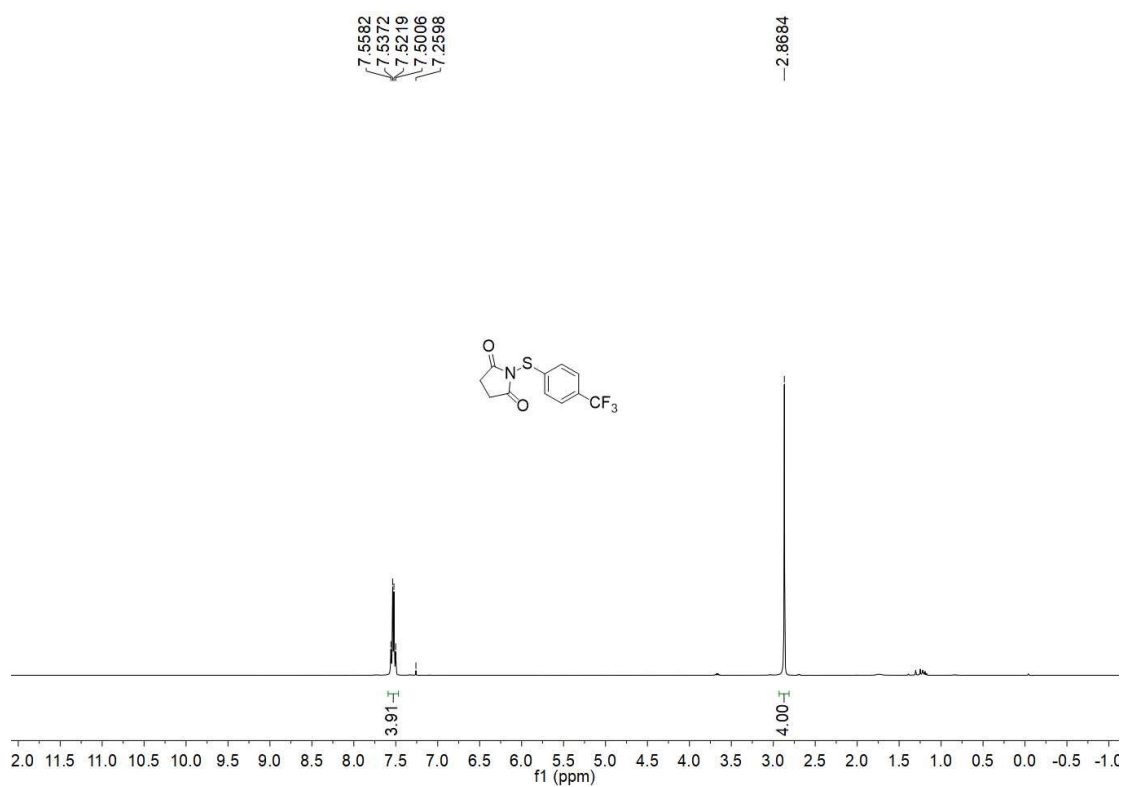

<sup>1</sup>H NMR (400 MHz, CDCl<sub>3</sub>) spectrum of Compound Su-2h

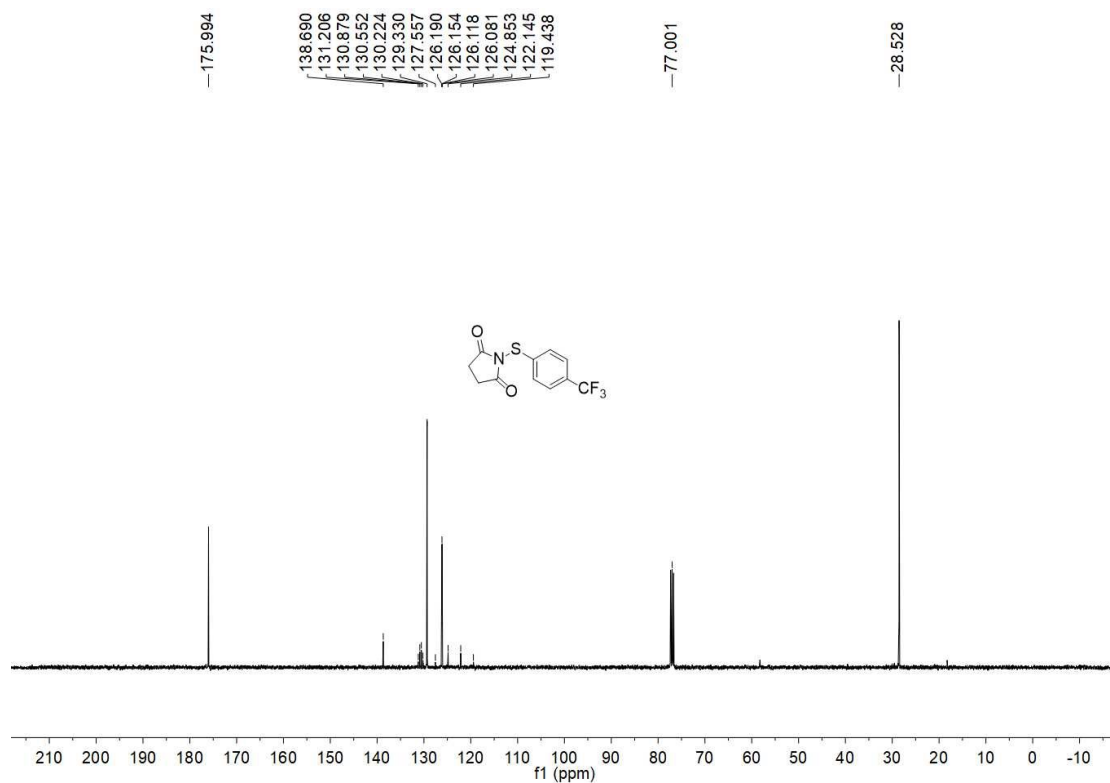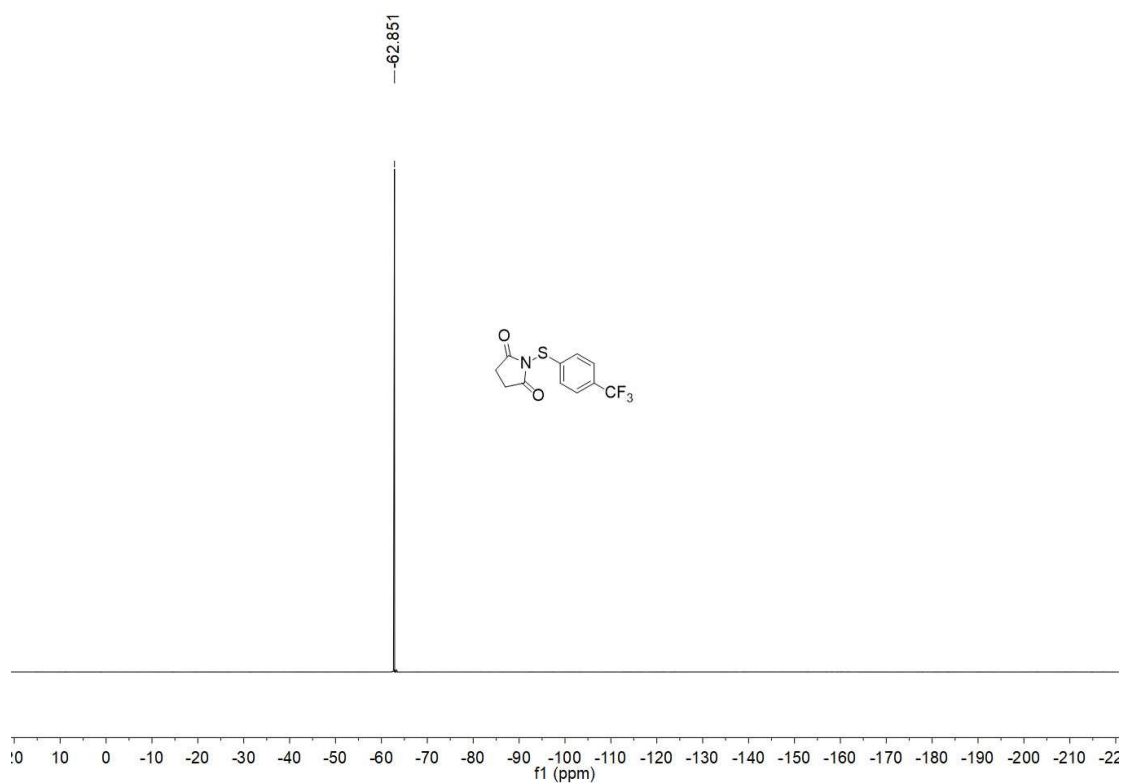

<sup>19</sup>F NMR (376 MHz, CDCl<sub>3</sub>) spectrum of Compound Su-2h

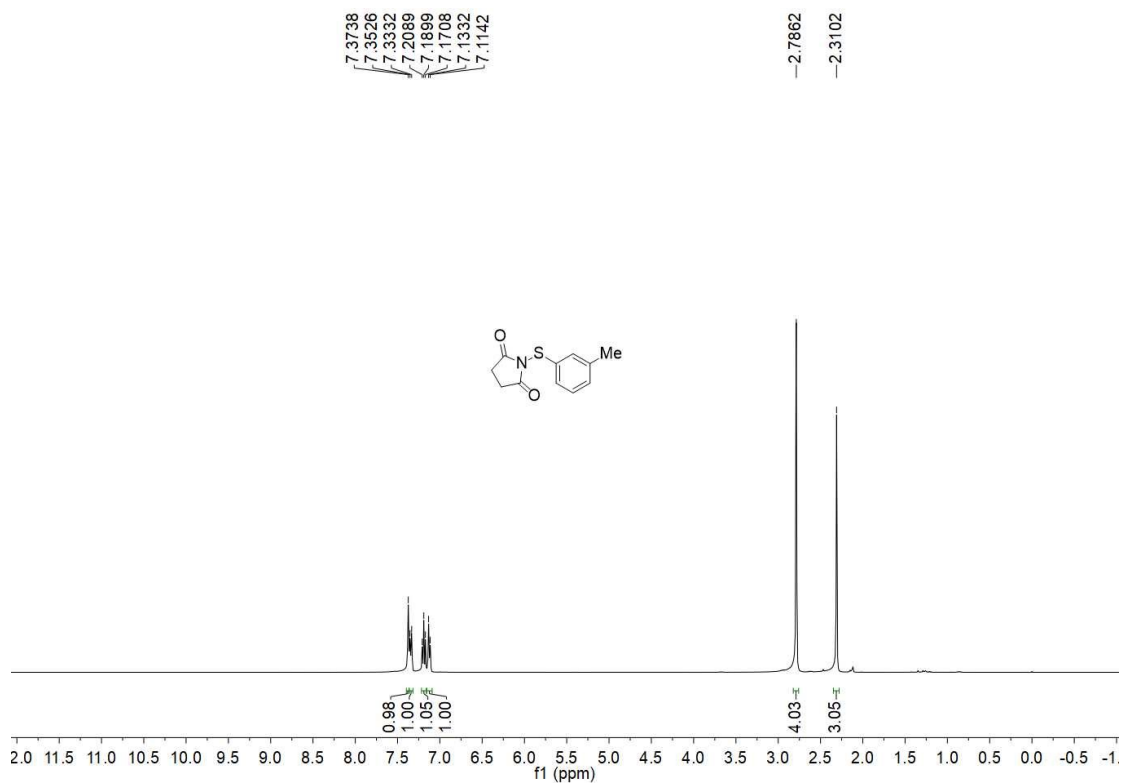

$^1\text{H}$  NMR (400 MHz,  $\text{CDCl}_3$ ) spectrum of Compound **Su-2i**

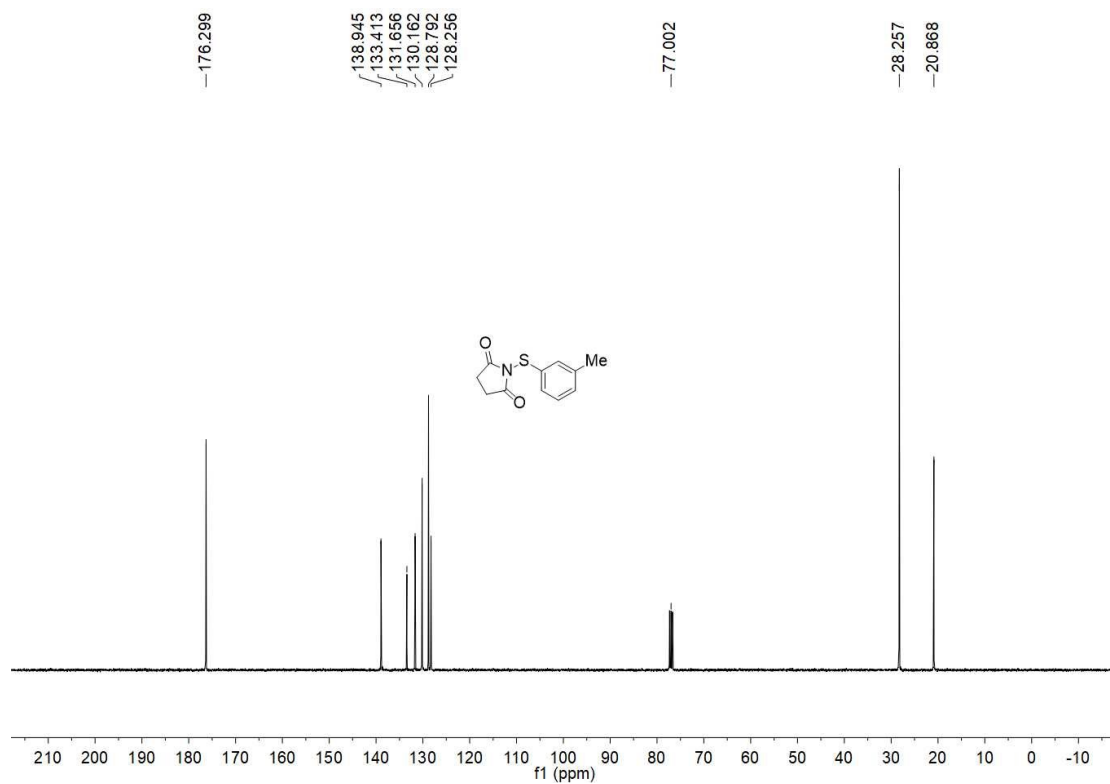

$^{13}\text{C}$  NMR (101 MHz,  $\text{CDCl}_3$ ) spectrum of Compound **Su-2i**



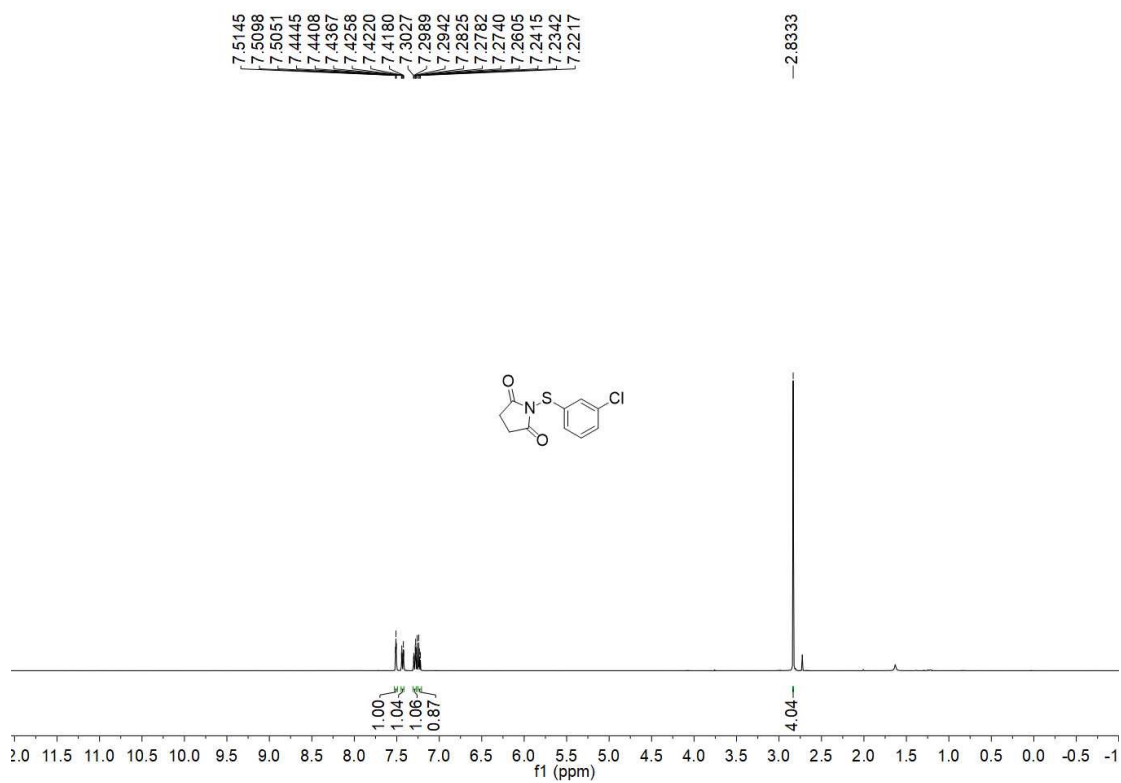

<sup>1</sup>H NMR (400 MHz, CDCl<sub>3</sub>) spectrum of Compound Su-2j

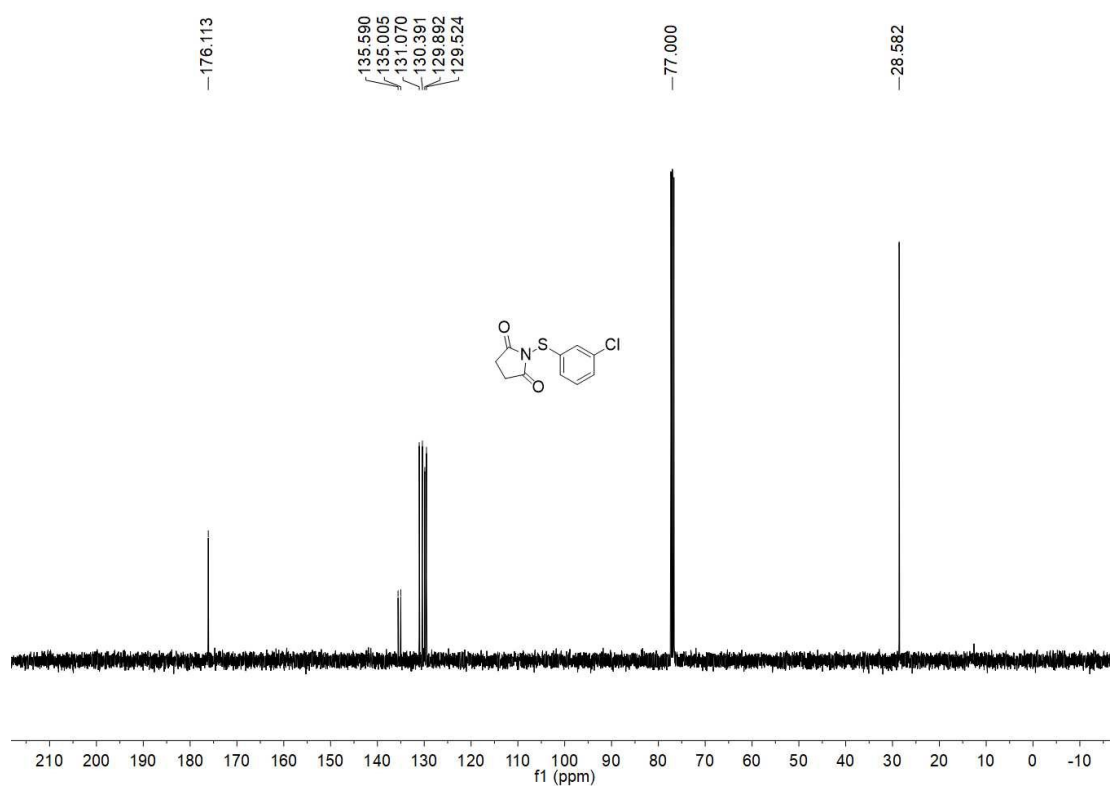

<sup>13</sup>C NMR (101MHz, CDCl<sub>3</sub>) spectrum of compound Su-2j

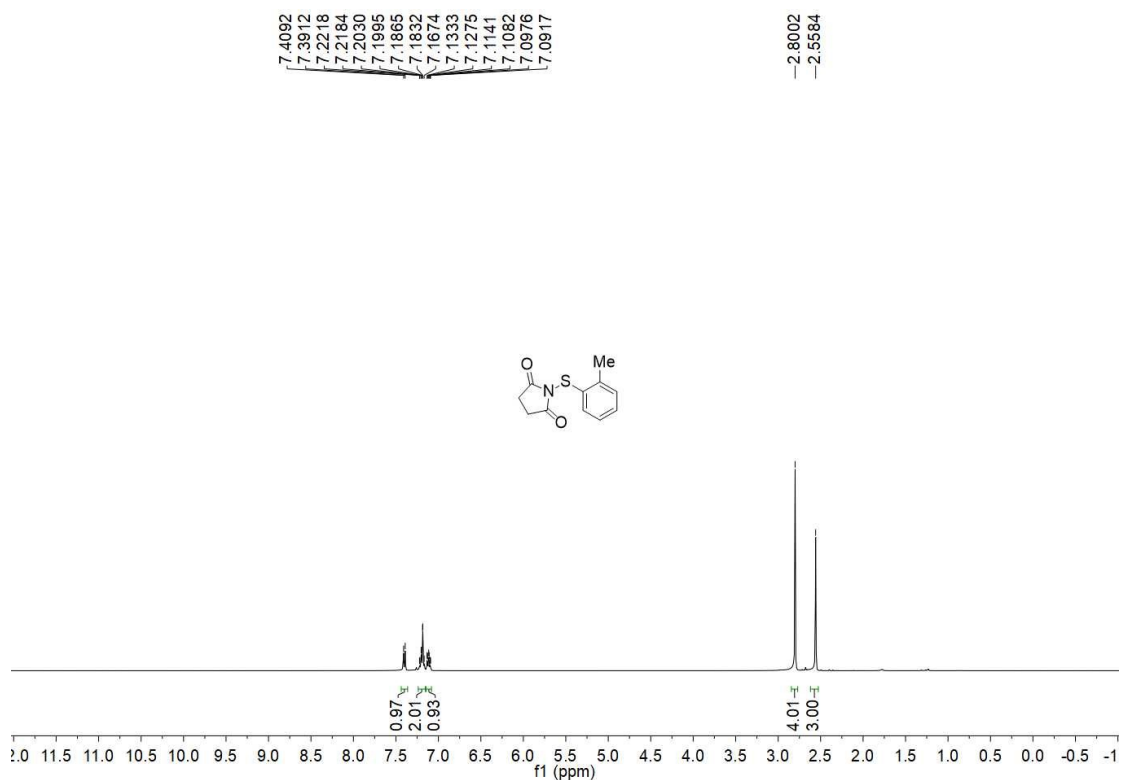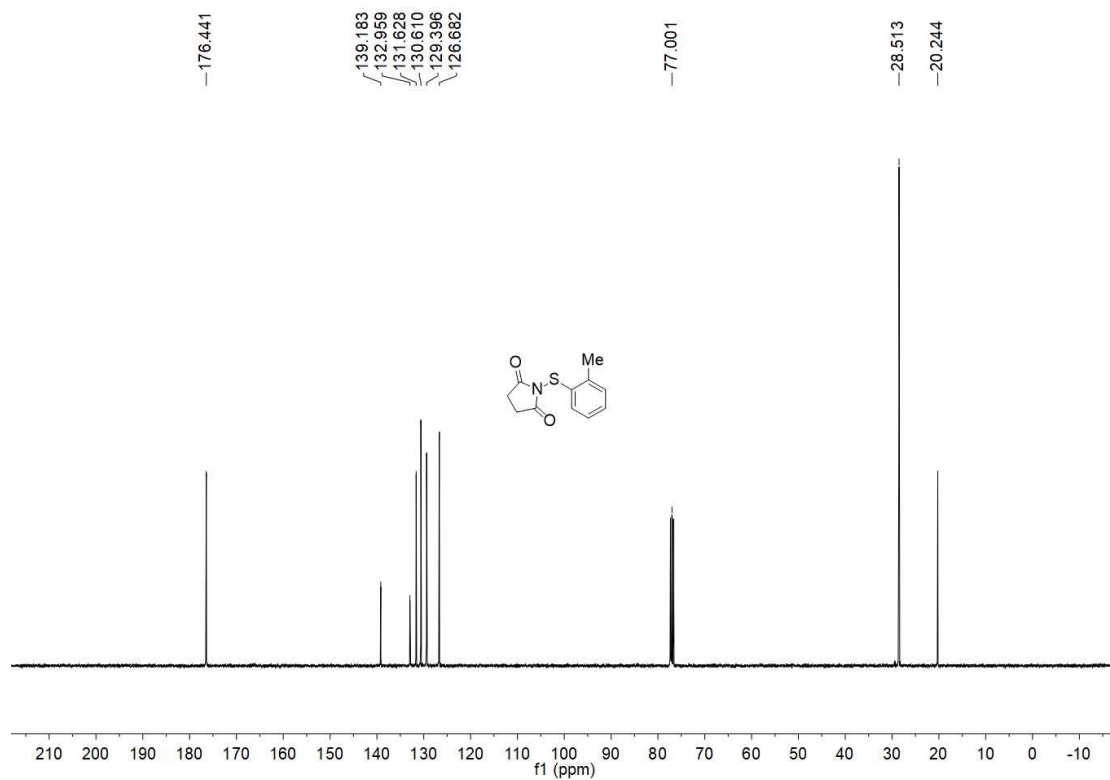

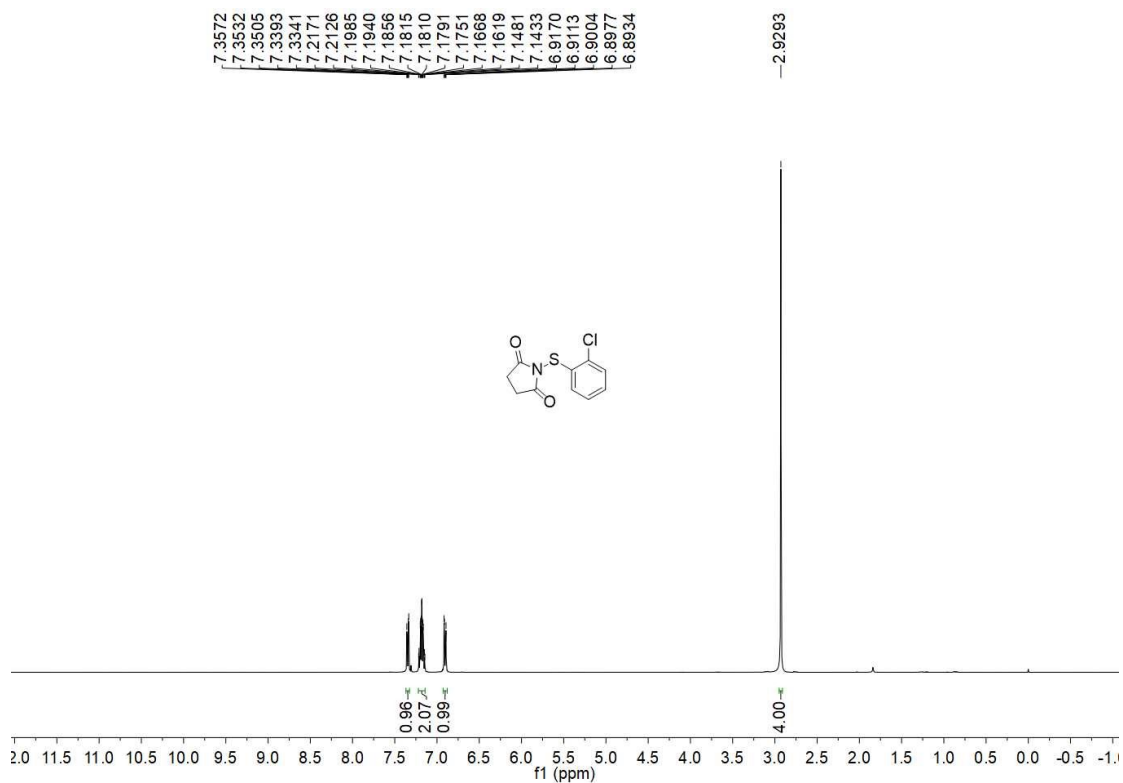

$^1\text{H}$  NMR (400 MHz,  $\text{CDCl}_3$ ) spectrum of Compound **Su-21**

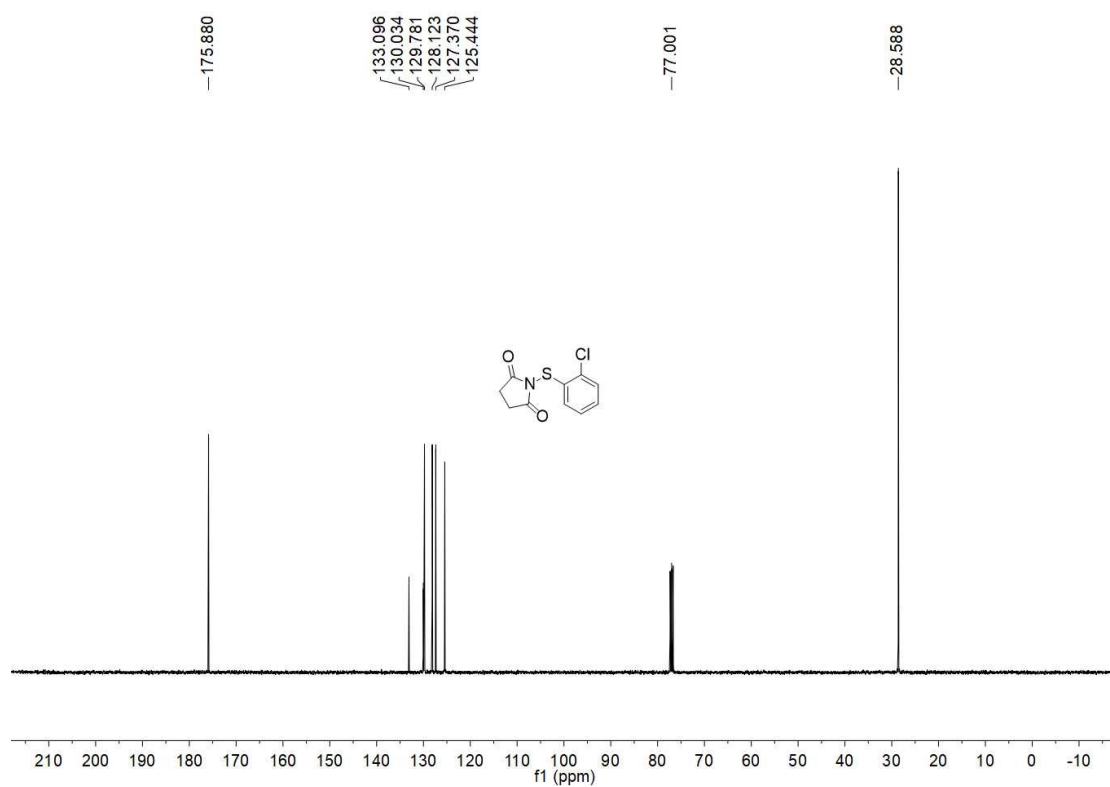

$^{13}\text{C}$  NMR (101 MHz,  $\text{CDCl}_3$ ) spectrum of Compound **Su-21**

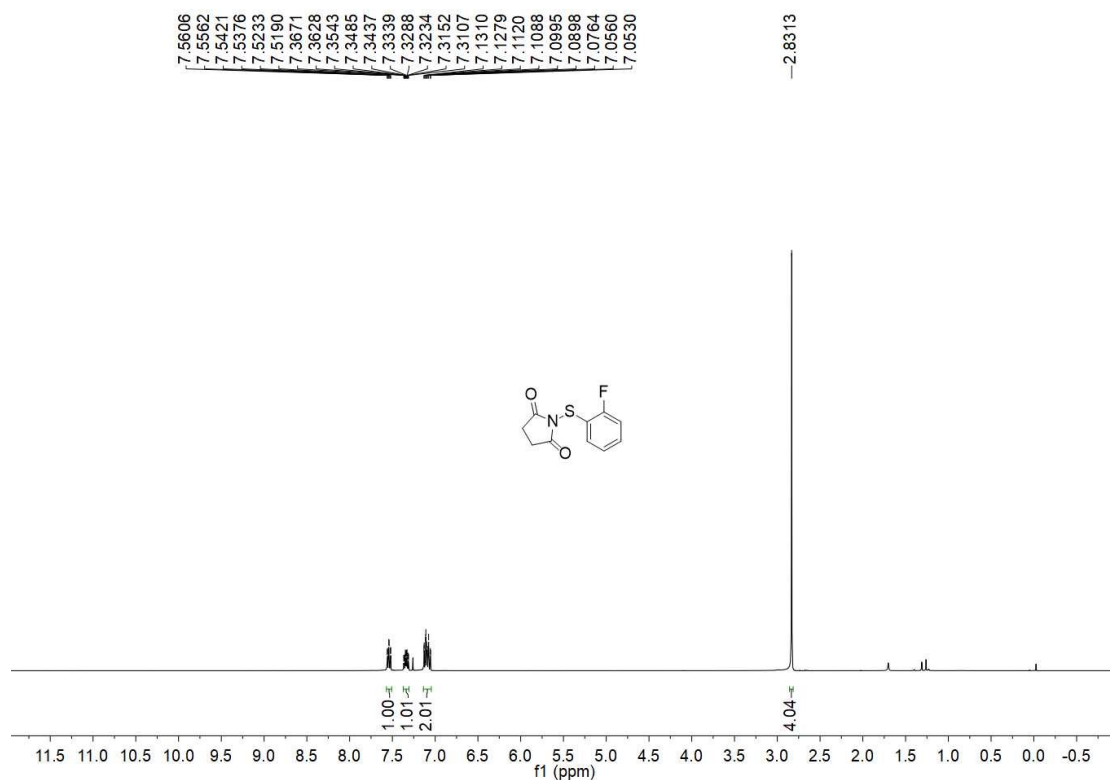

$^1\text{H}$  NMR (400 MHz,  $\text{CDCl}_3$ ) spectrum of Compound **Su-2m**

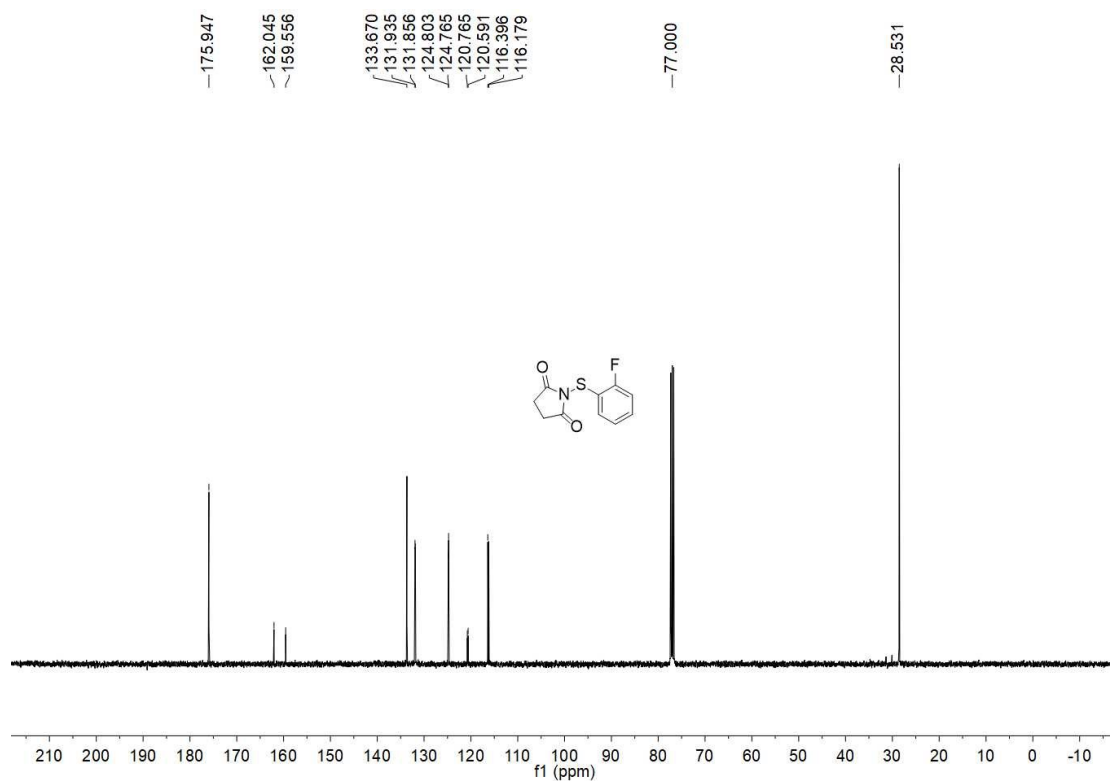

$^{13}\text{C}$  NMR (101 MHz,  $\text{CDCl}_3$ ) spectrum of Compound **Su-2m**

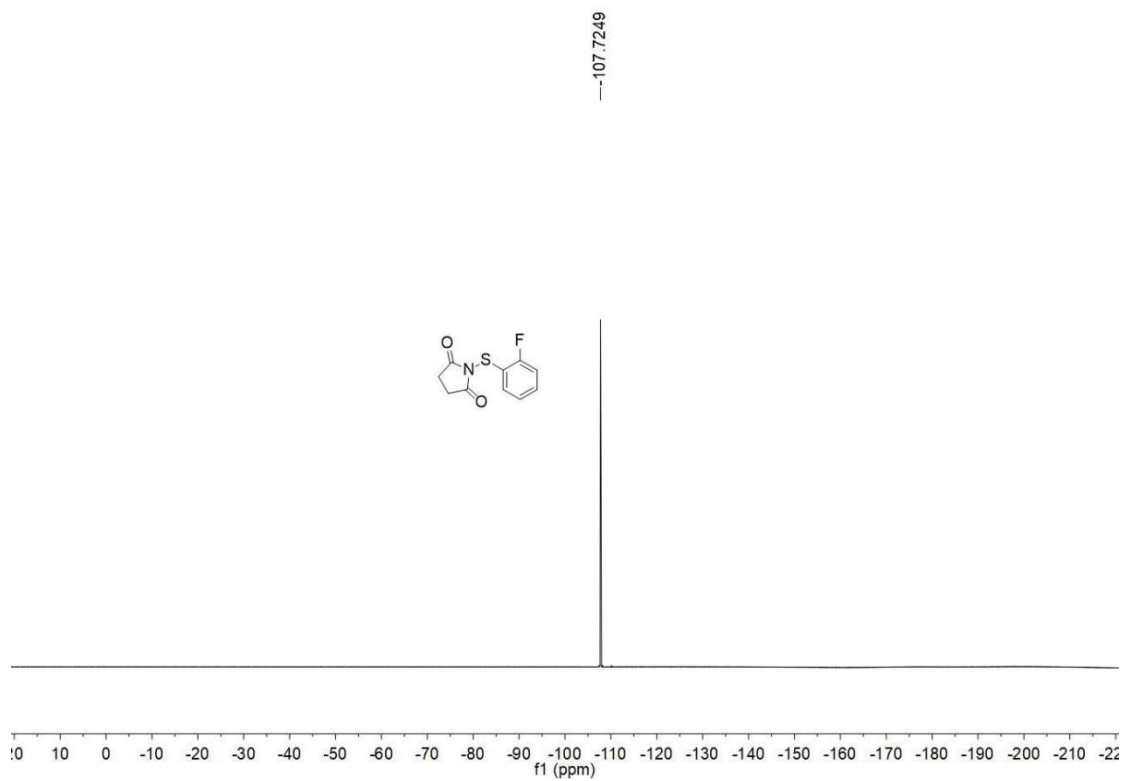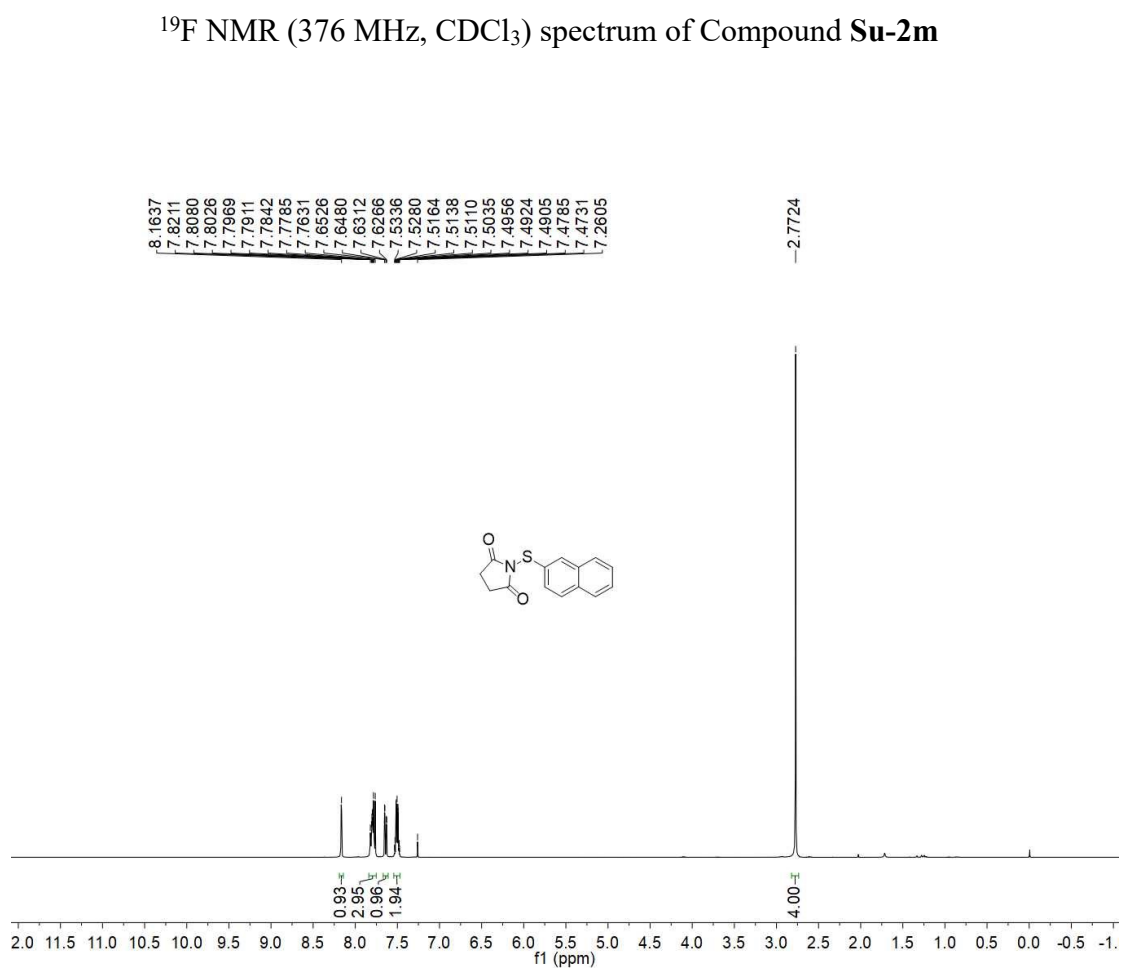

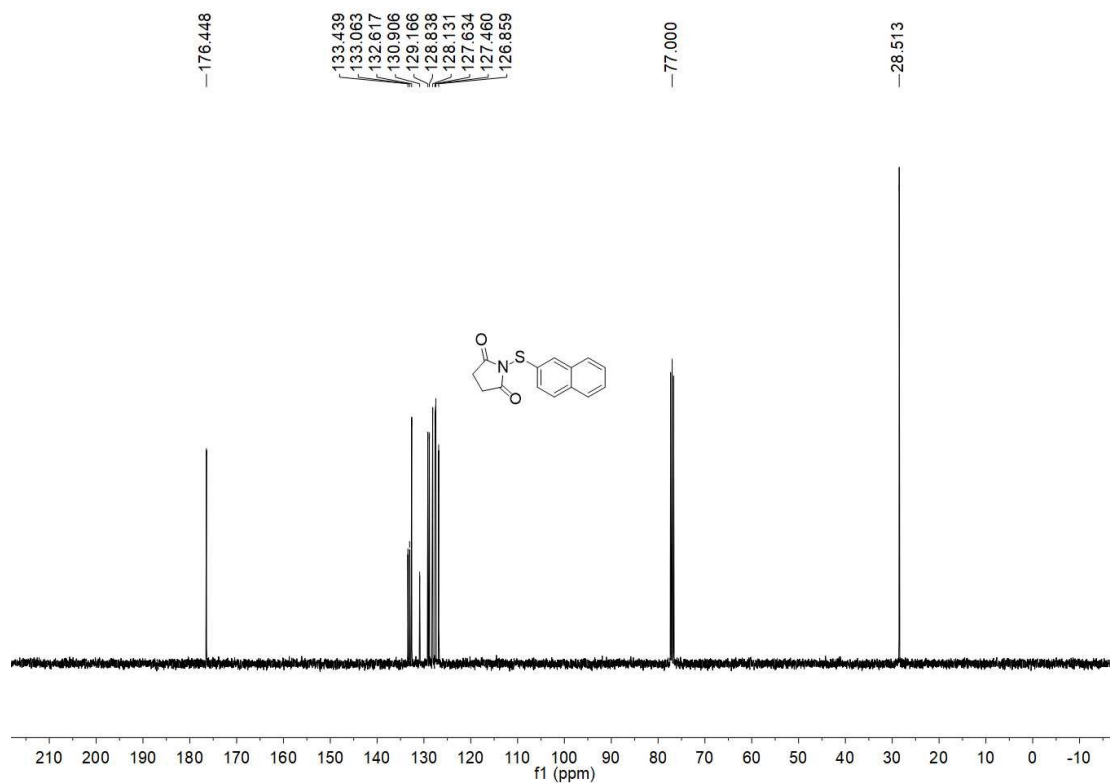

$^{13}\text{C}$  NMR (101 MHz,  $\text{CDCl}_3$ ) spectrum of Compound Su-2n

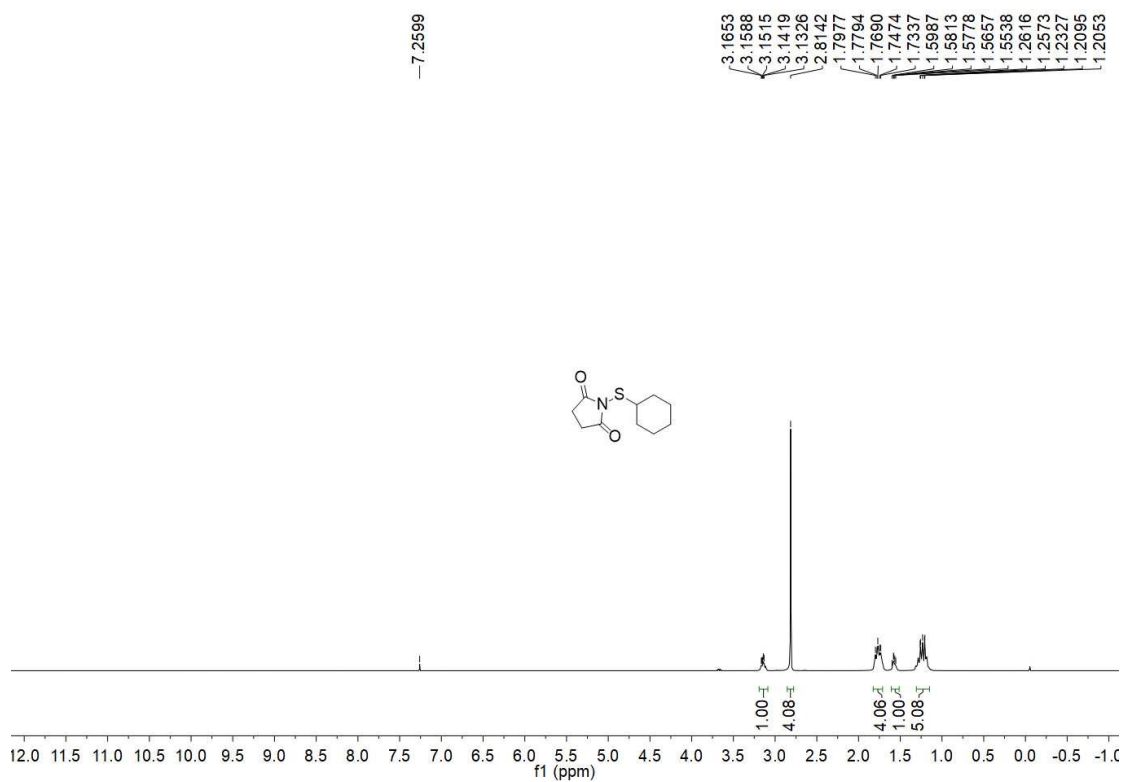

$^1\text{H}$  NMR (400 MHz,  $\text{CDCl}_3$ ) spectrum of Compound Su-2o

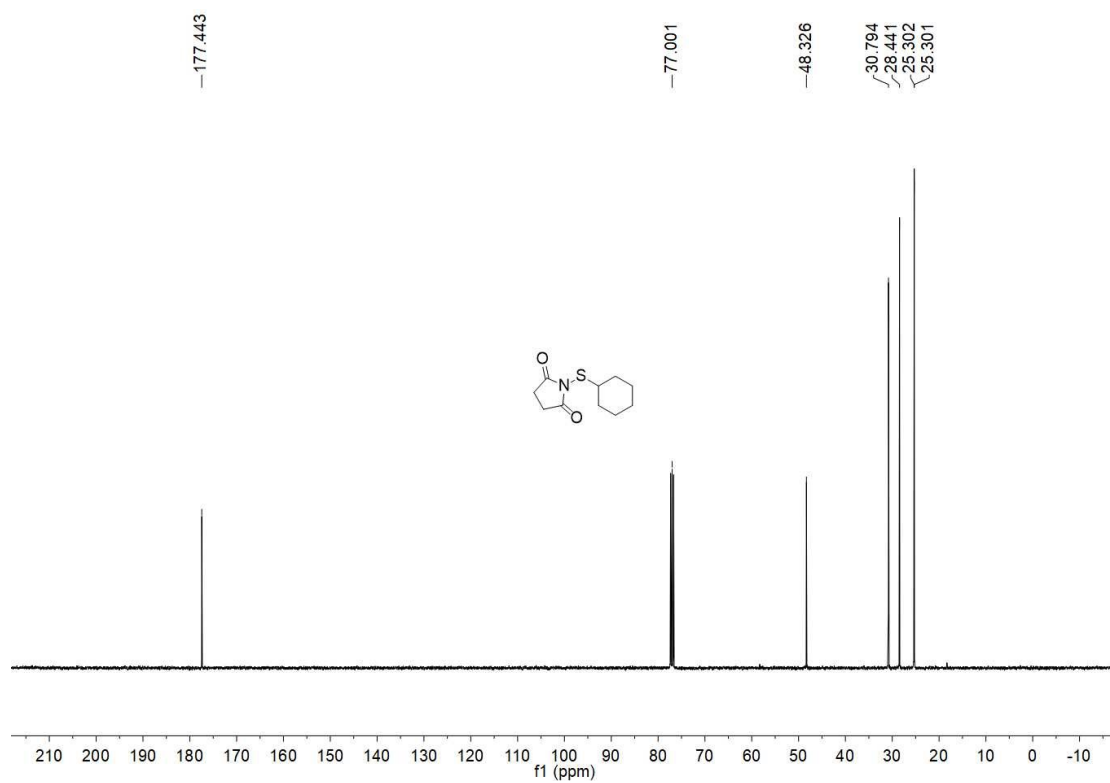

<sup>13</sup>C NMR (101 MHz, CDCl<sub>3</sub>) spectrum of Compound Su-2o

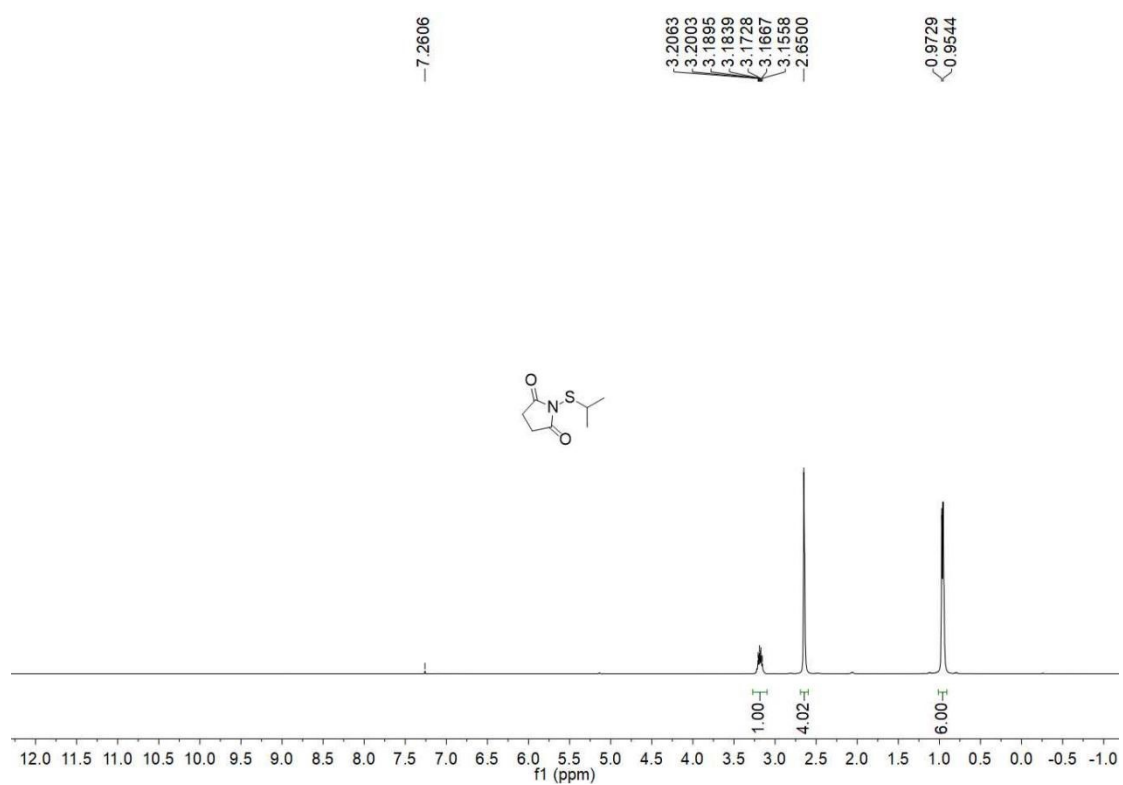

<sup>1</sup>H NMR (400 MHz, CDCl<sub>3</sub>) spectrum of Compound Su-2p

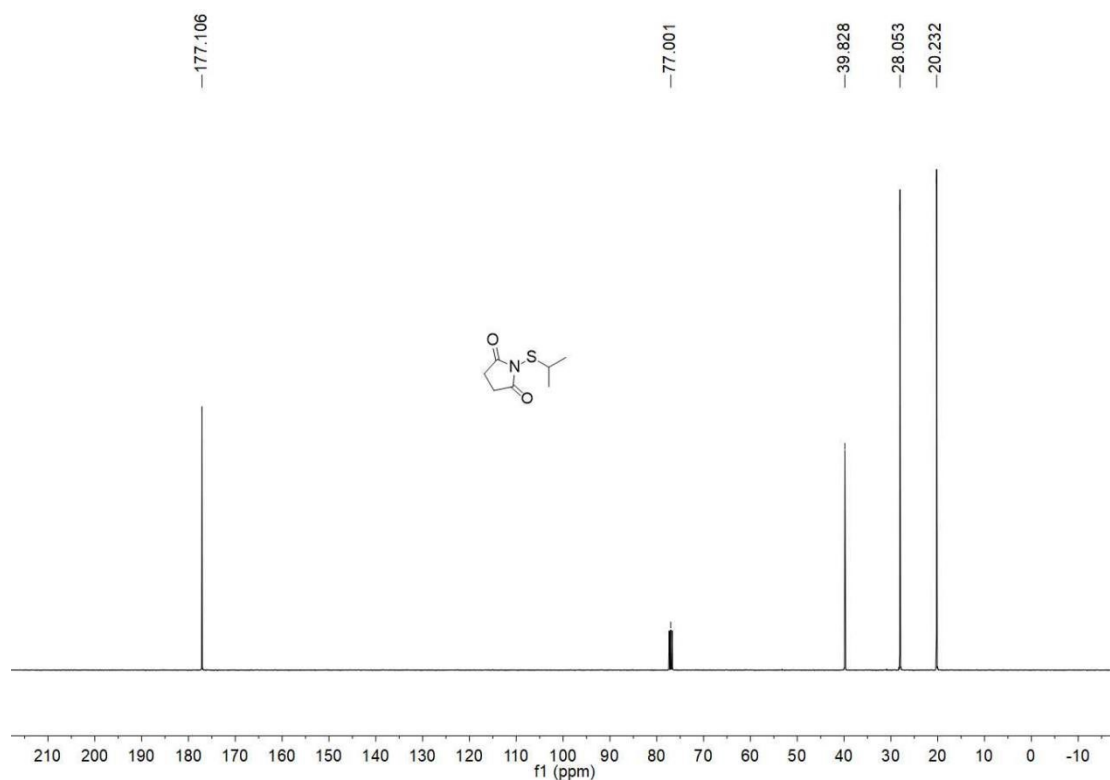

$^{13}\text{C}$  NMR (101 MHz,  $\text{CDCl}_3$ ) spectrum of Compound Su-2p

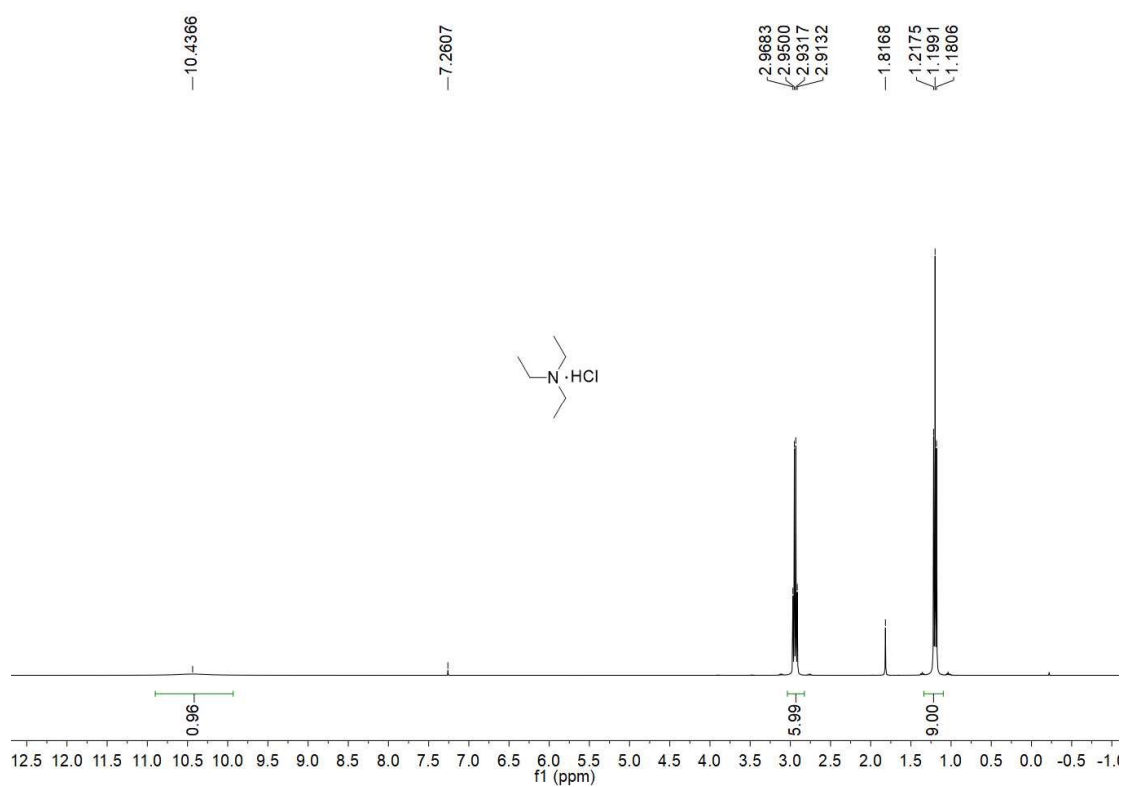

$^1\text{H}$  NMR (400 MHz,  $\text{CDCl}_3$ ) spectrum of  $\text{Et}_3\text{NHCl}$



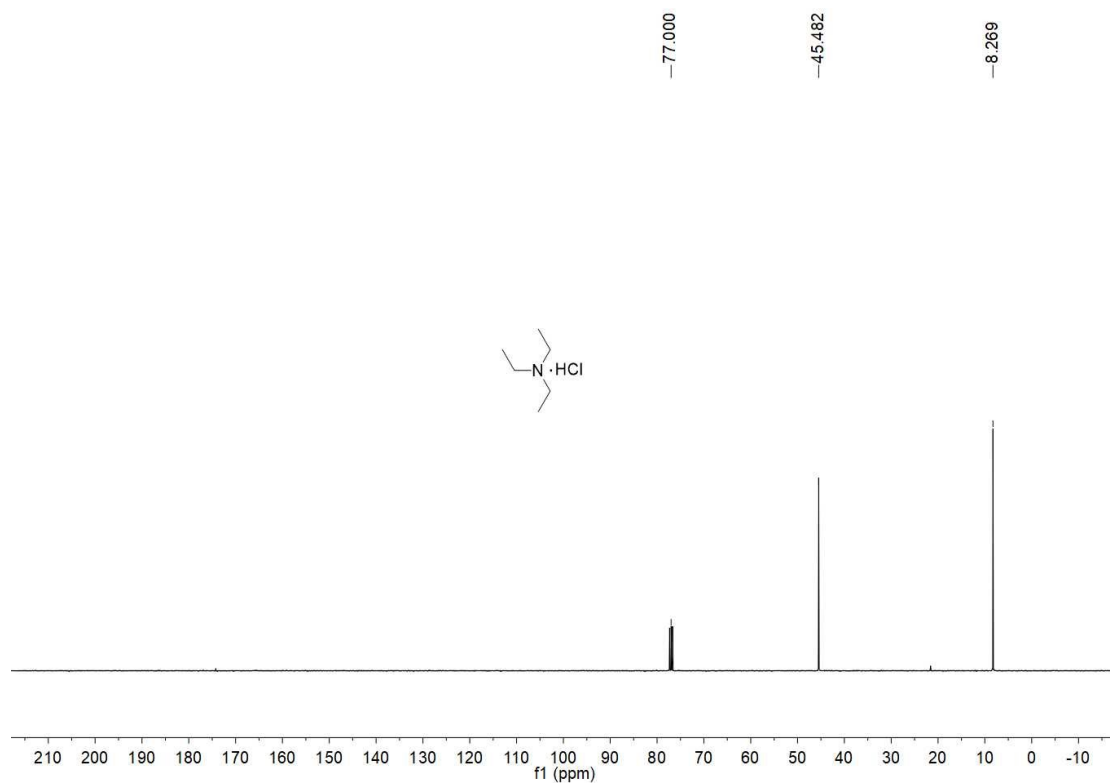

$^{13}\text{C}$  NMR (101 MHz,  $\text{CDCl}_3$ ) spectrum of  $\text{Et}_3\text{NHCl}$

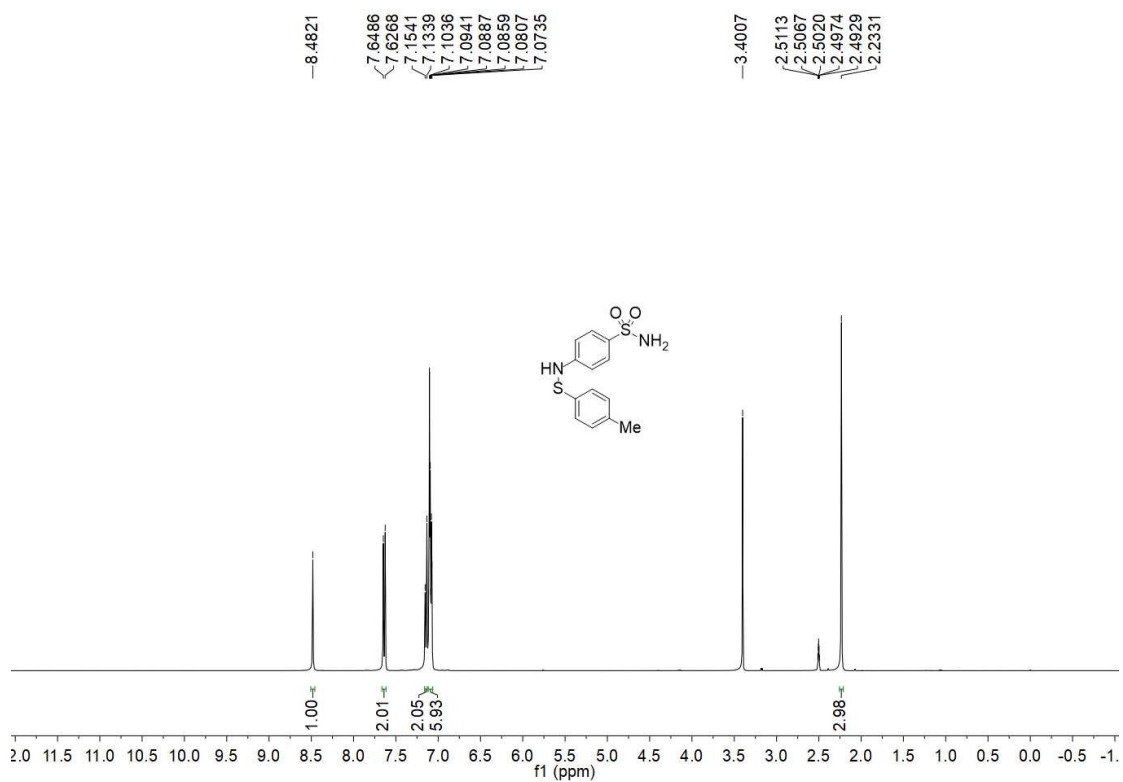

$^1\text{H}$  NMR (400 MHz,  $\text{DMSO}-d_6$ ) spectrum of Compound **3a**

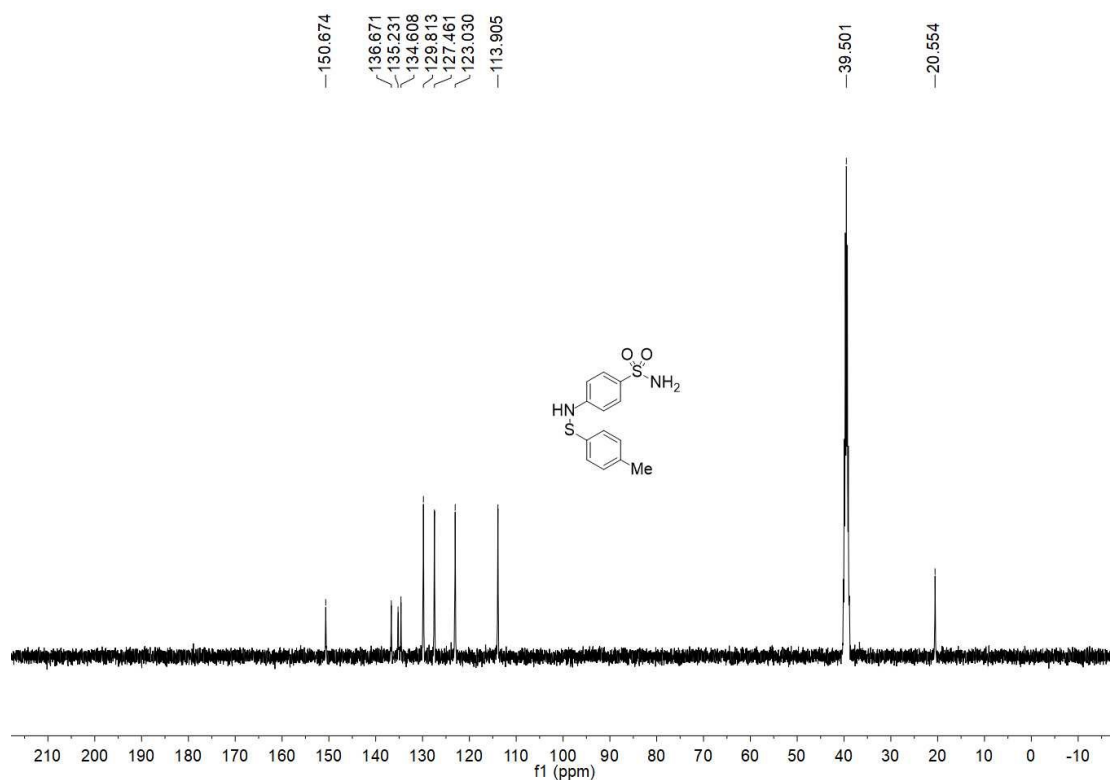

$^{13}\text{C}$  NMR (101 MHz,  $\text{DMSO-}d_6$ ) spectrum of Compound 3a

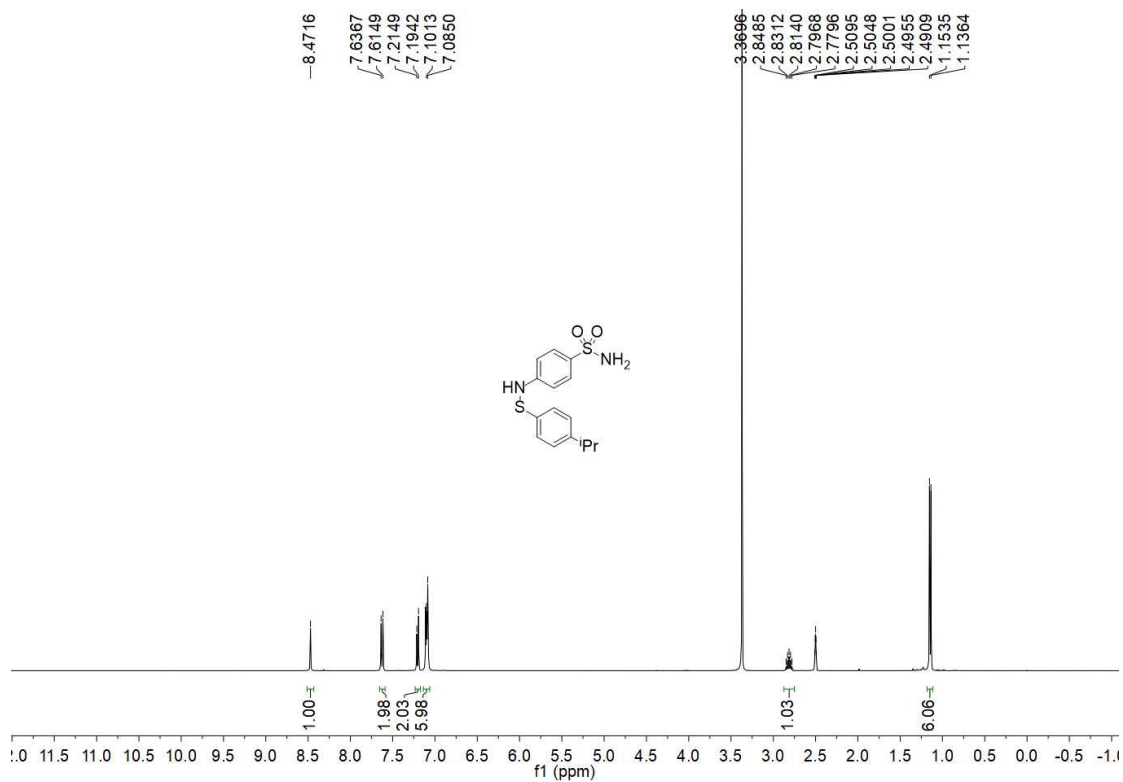

$^1\text{H}$  NMR (400 MHz,  $\text{DMSO-}d_6$ ) spectrum of Compound 3b

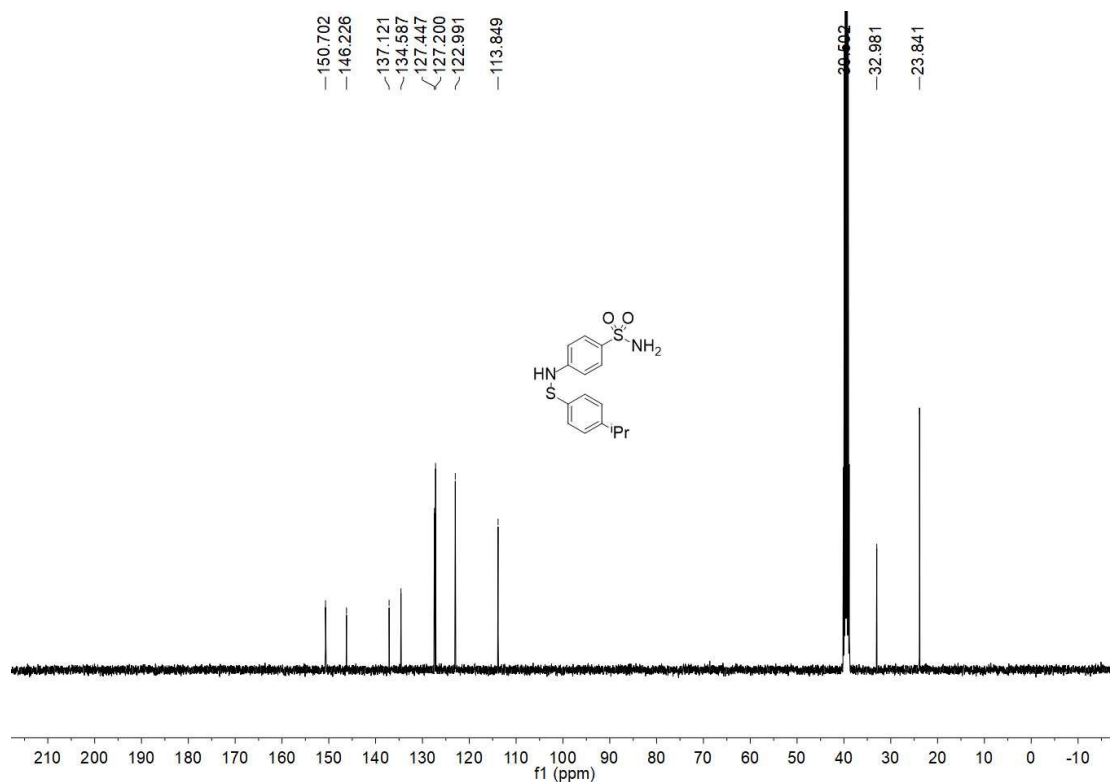

<sup>13</sup>C NMR (101 MHz, DMSO-*d*<sub>6</sub>) spectrum of Compound 3b

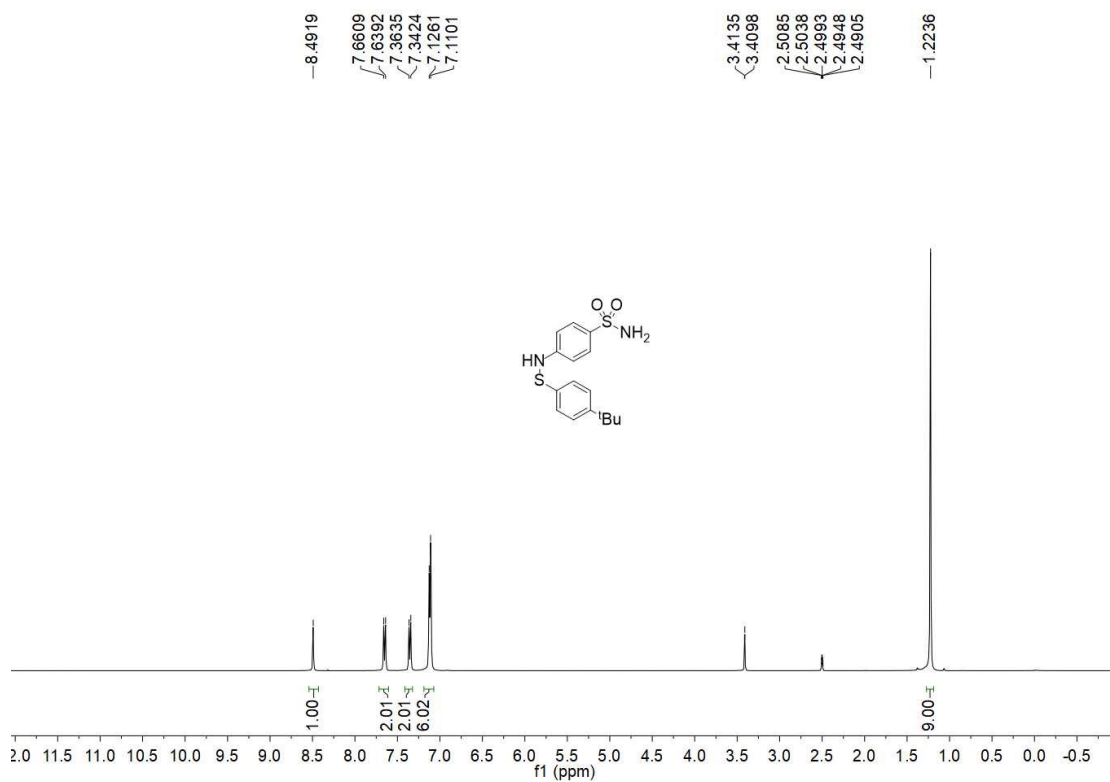

<sup>1</sup>H NMR (400 MHz, DMSO-*d*<sub>6</sub>) spectrum of Compound 3c

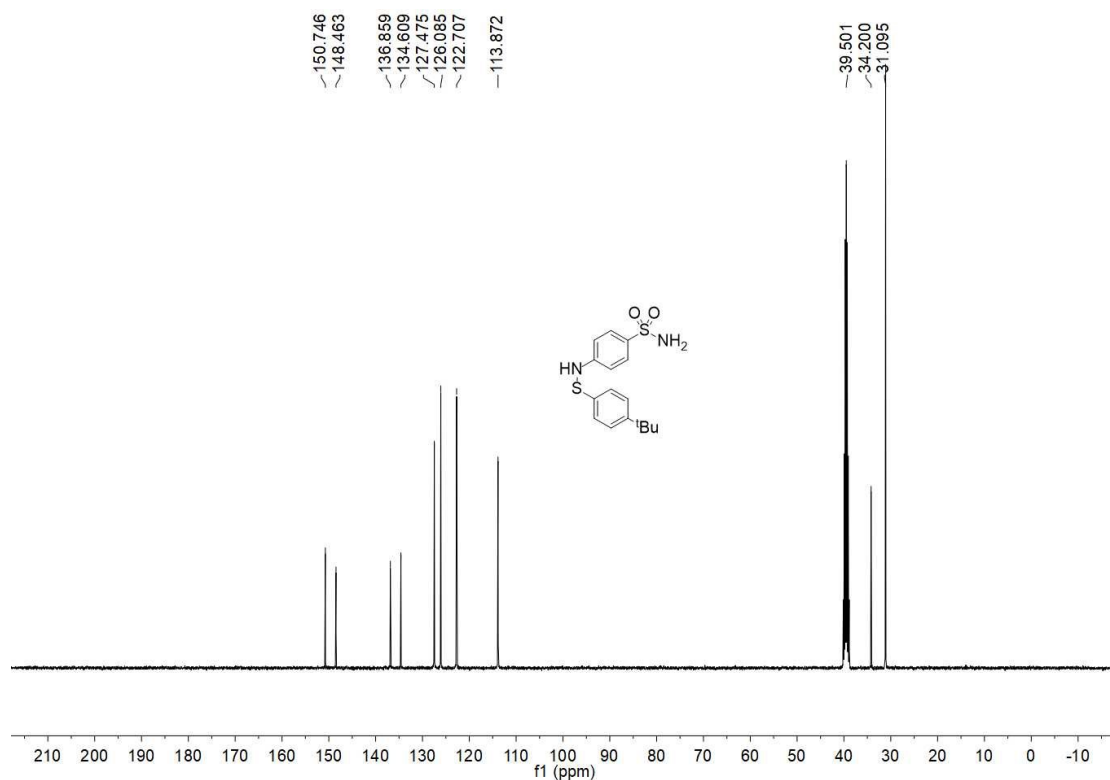

$^{13}\text{C}$  NMR (101 MHz, DMSO- $d_6$ ) spectrum of Compound 3c

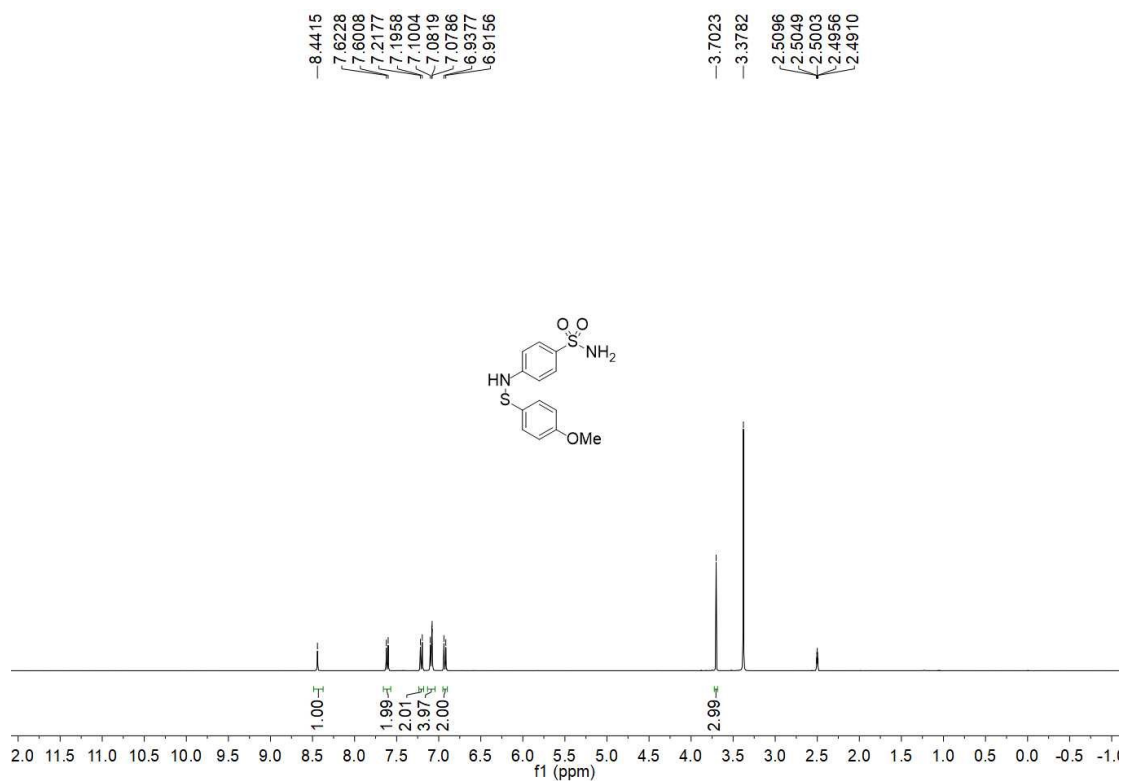

$^1\text{H}$  NMR (400 MHz, DMSO- $d_6$ ) spectrum of Compound 3d

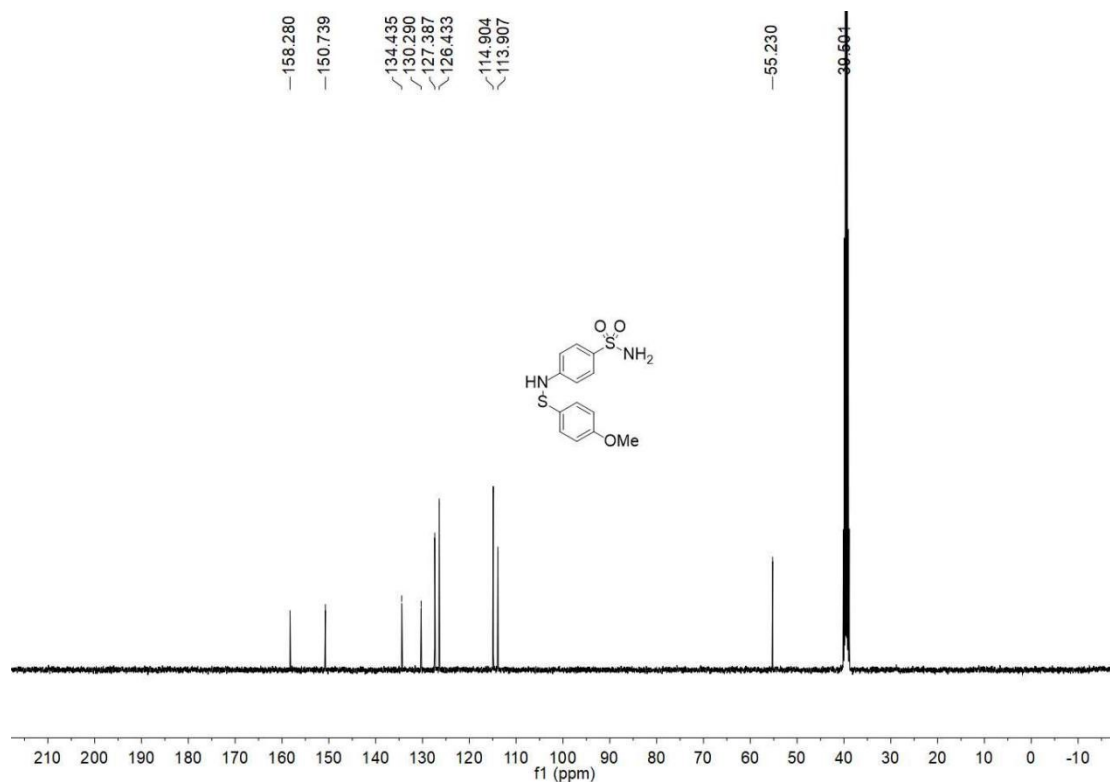

<sup>13</sup>C NMR (101 MHz, DMSO-*d*<sub>6</sub>) spectrum of Compound 3d

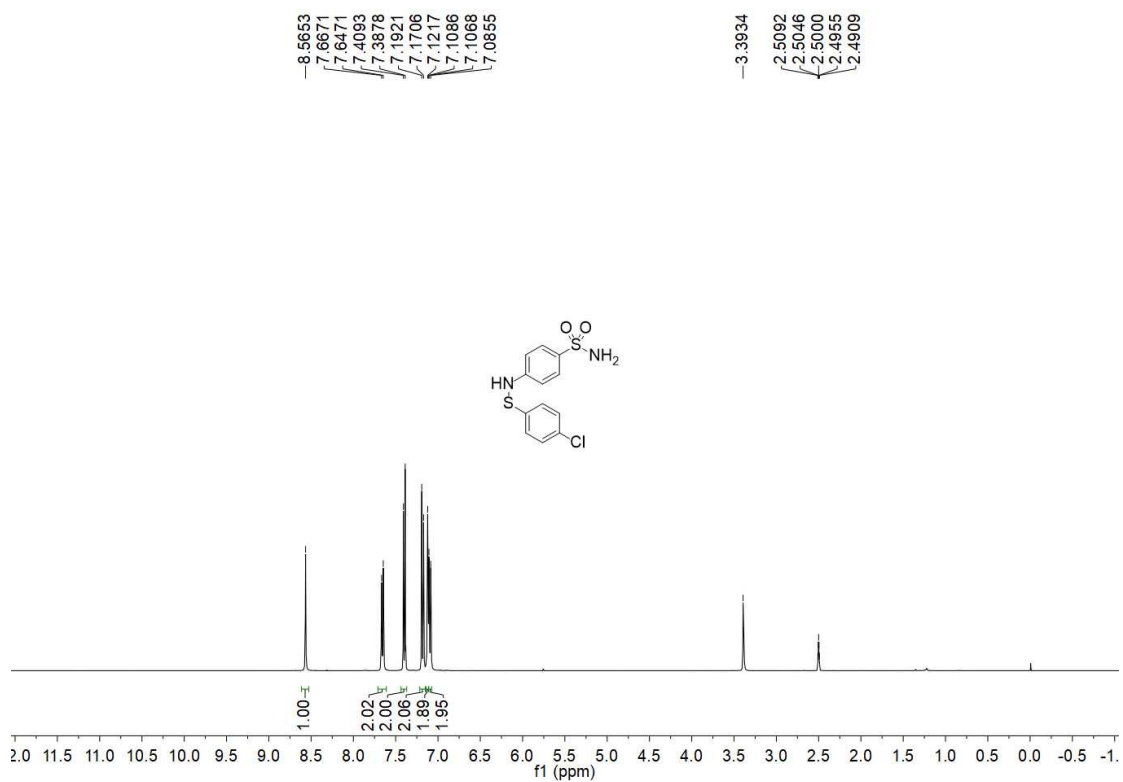

<sup>1</sup>H NMR (400 MHz, DMSO-*d*<sub>6</sub>) spectrum of Compound 3e

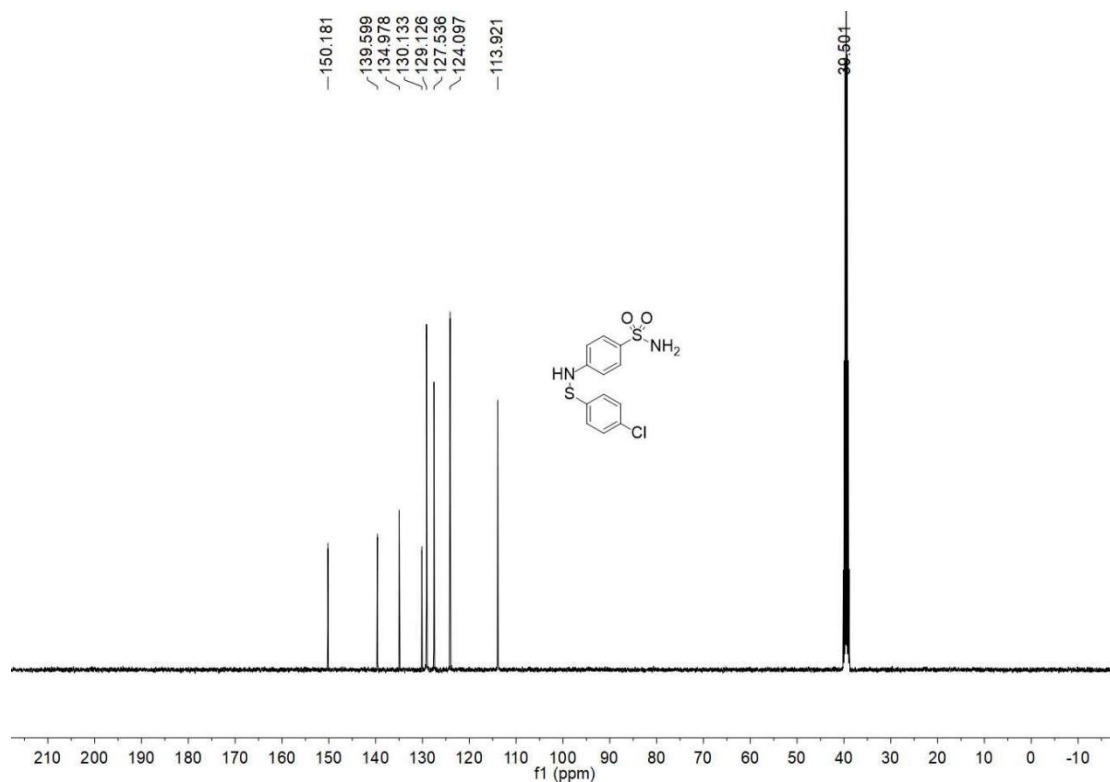

<sup>13</sup>C NMR (101 MHz, DMSO-*d*<sub>6</sub>) spectrum of Compound 3e

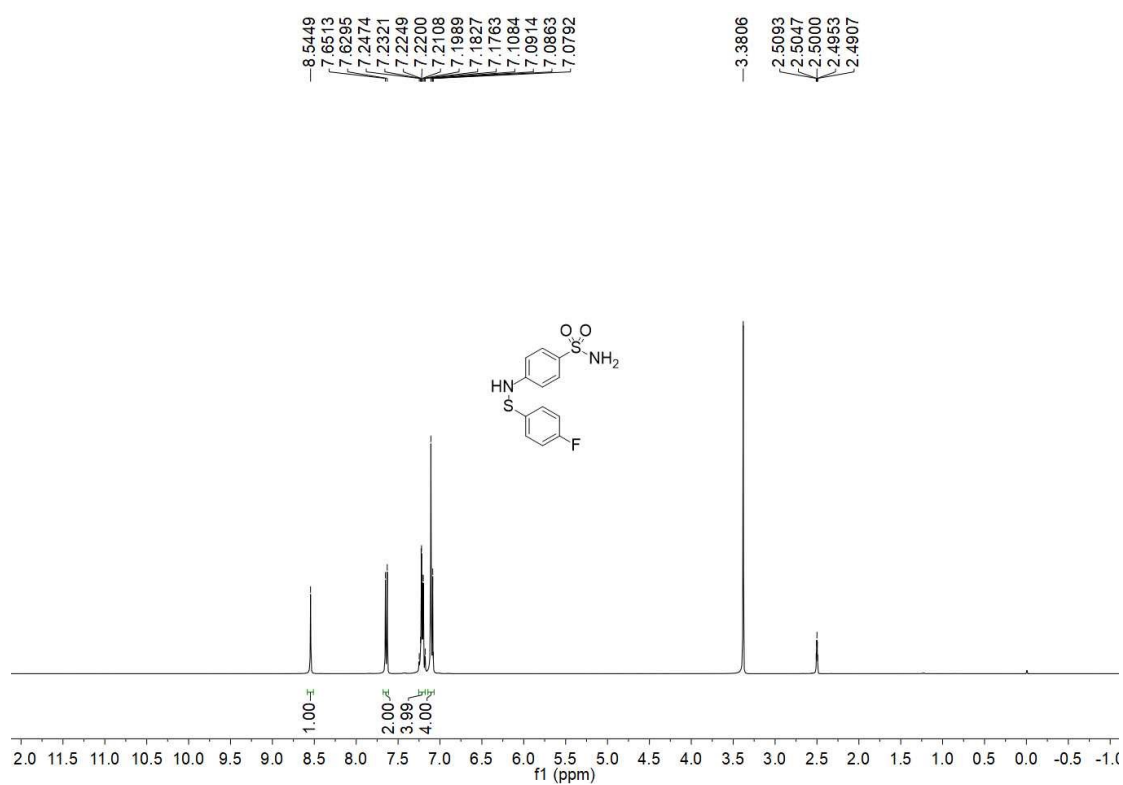

<sup>1</sup>H NMR (400 MHz, DMSO-*d*<sub>6</sub>) spectrum of Compound 3f

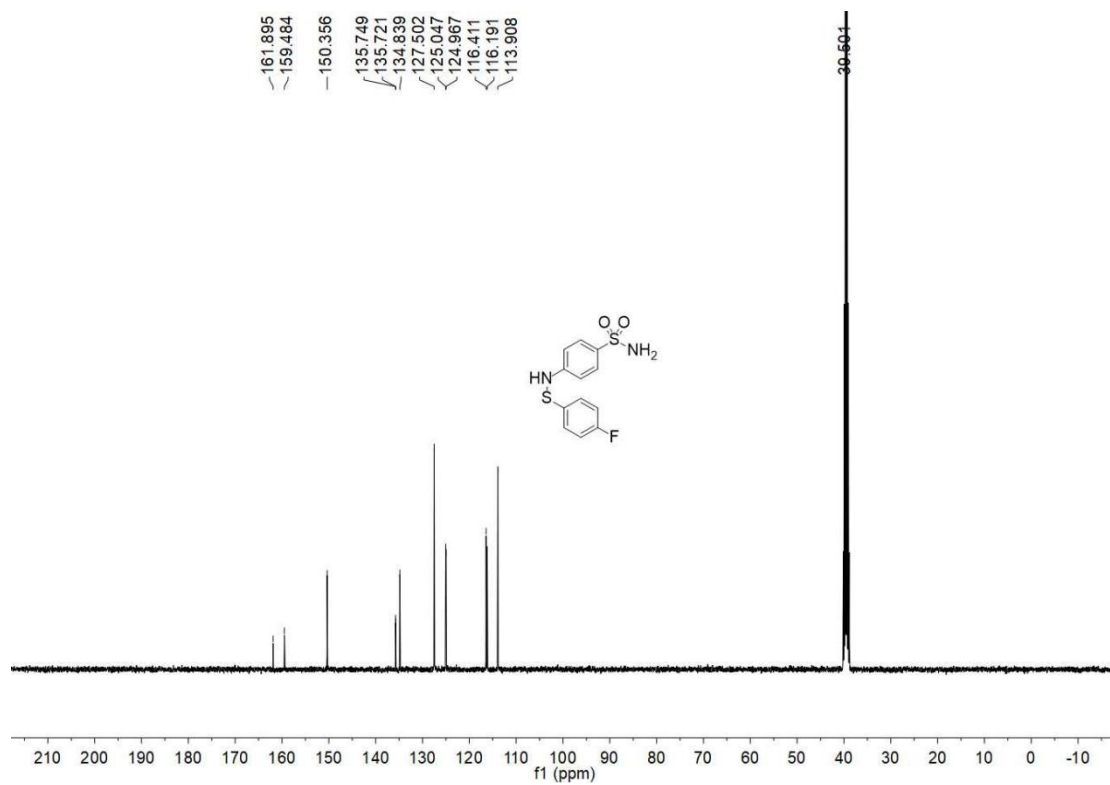

$^{13}\text{C}$  NMR (101 MHz,  $\text{DMSO-}d_6$ ) spectrum of Compound **3f**

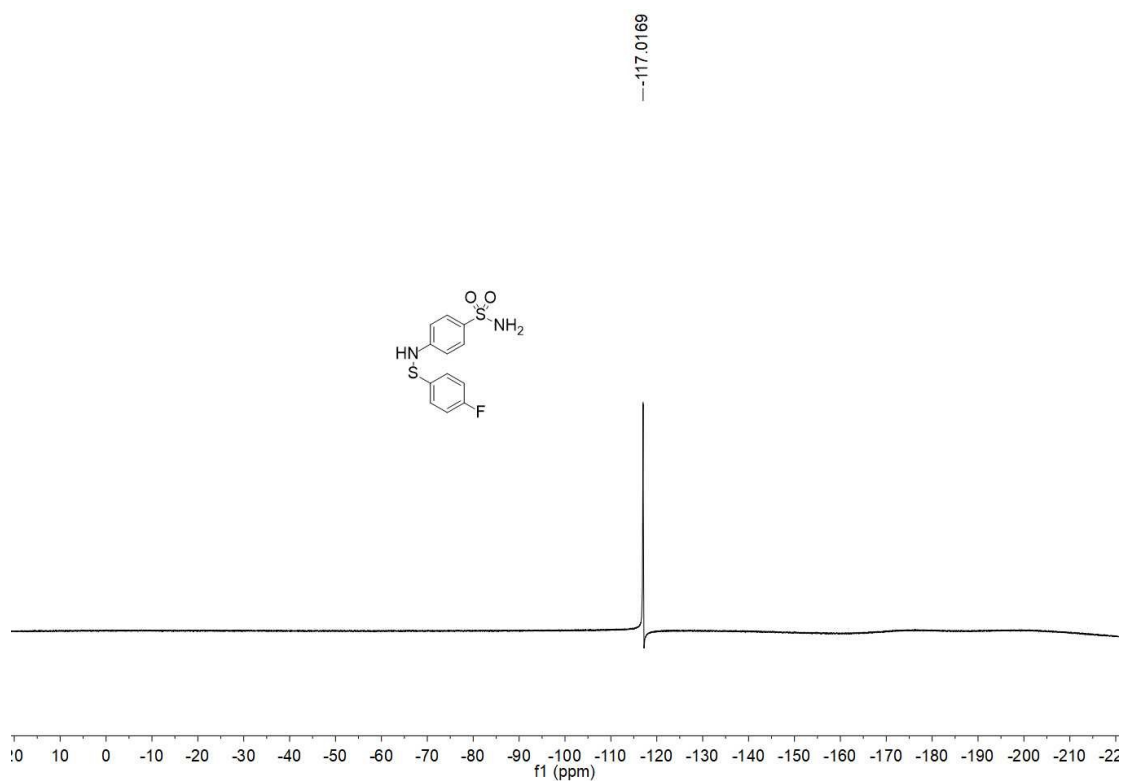

$^{19}\text{F}$  NMR (376 MHz,  $\text{DMSO-}d_6$ ) spectrum of Compound **3f**

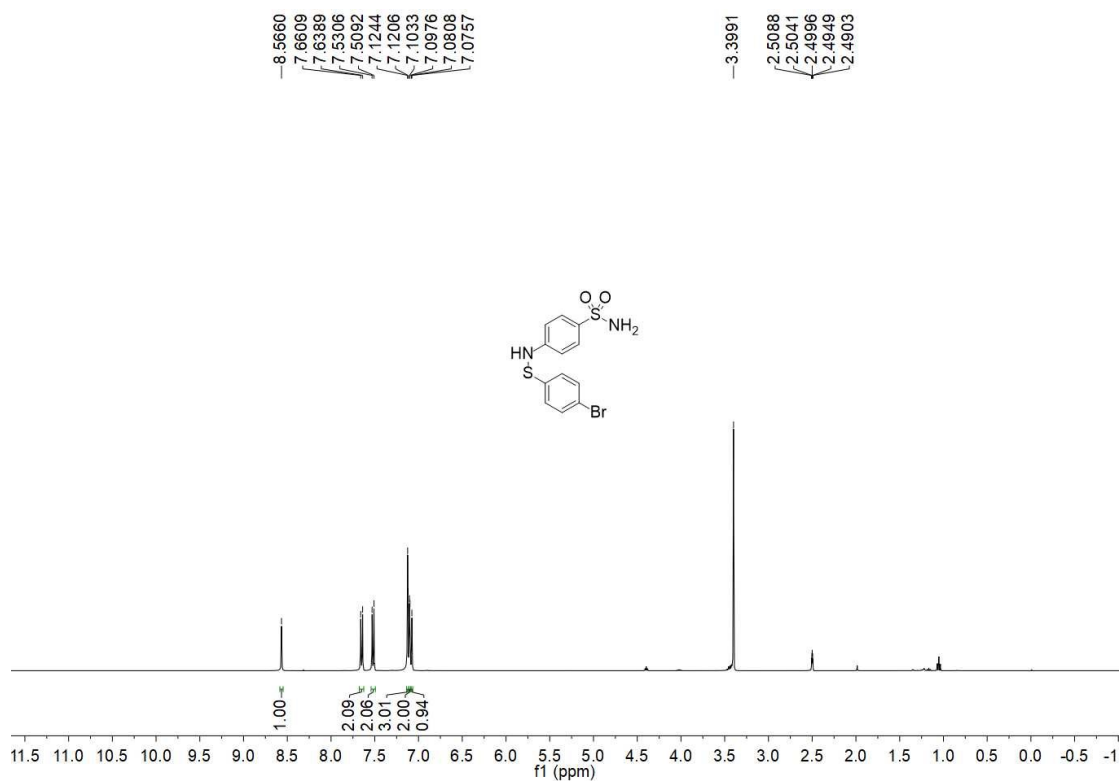

<sup>1</sup>H NMR (400 MHz, DMSO-*d*<sub>6</sub>) spectrum of Compound **3g**

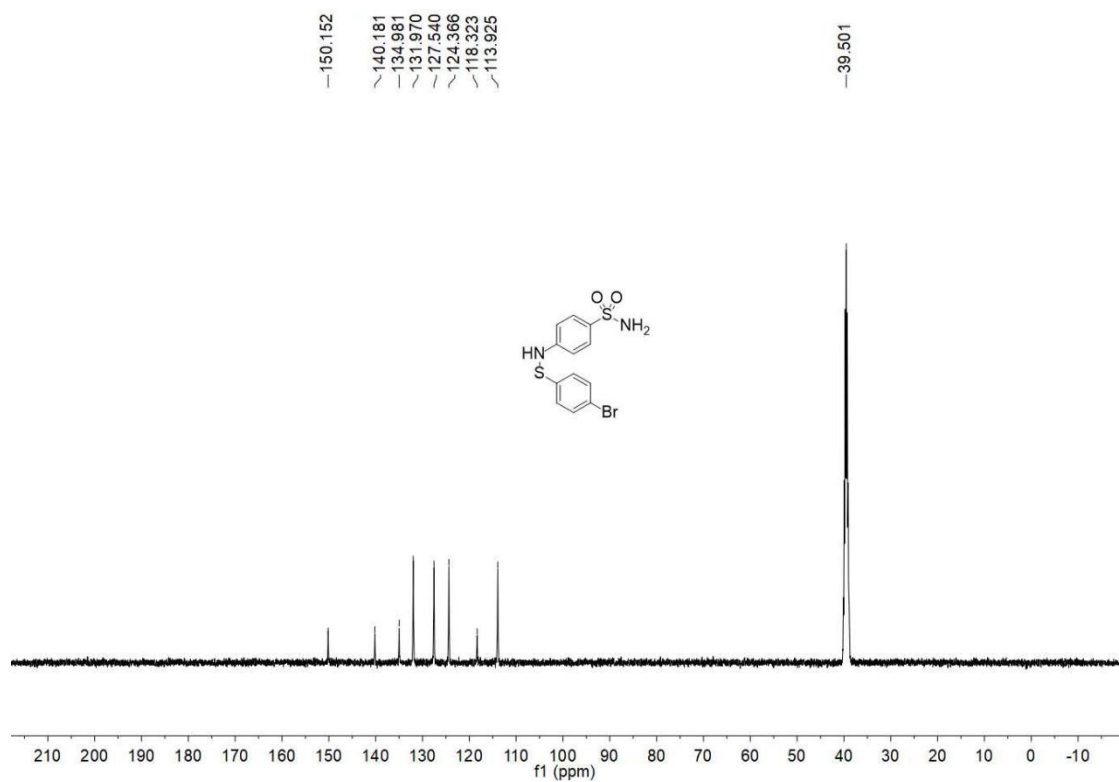

<sup>13</sup>C NMR (101 MHz, DMSO-*d*<sub>6</sub>) spectrum of Compound **3g**



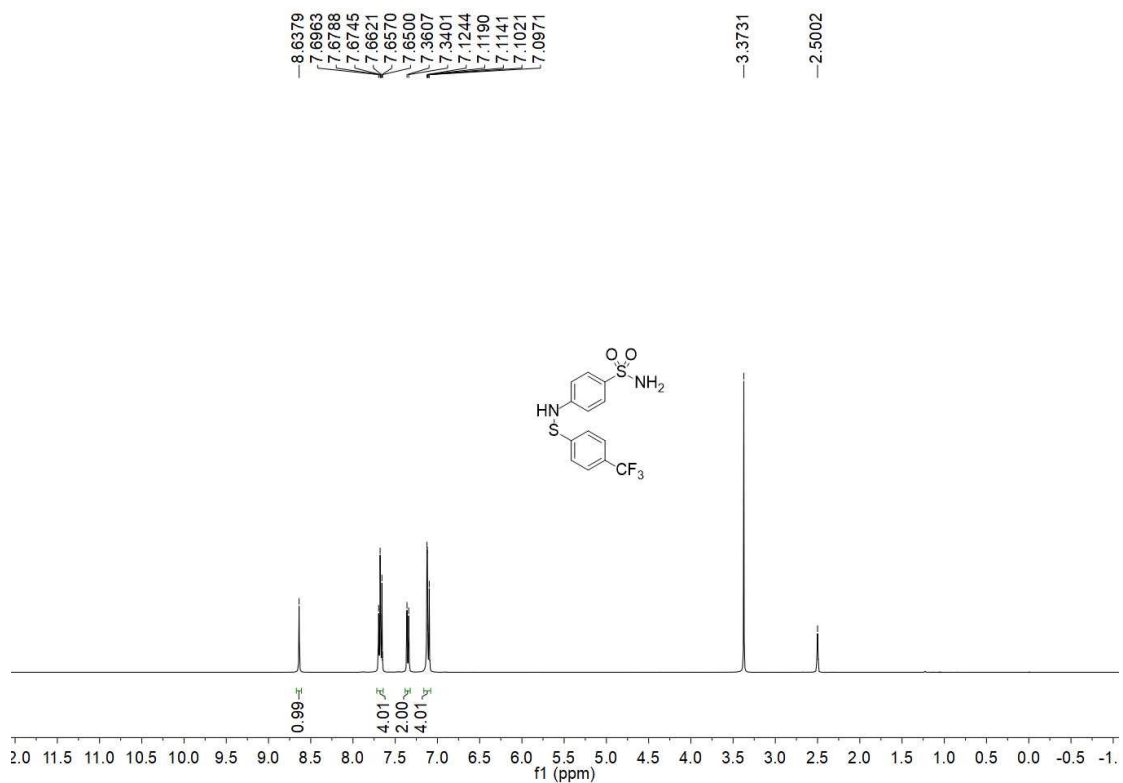

<sup>1</sup>H NMR (400 MHz, DMSO-*d*<sub>6</sub>) spectrum of Compound 3h

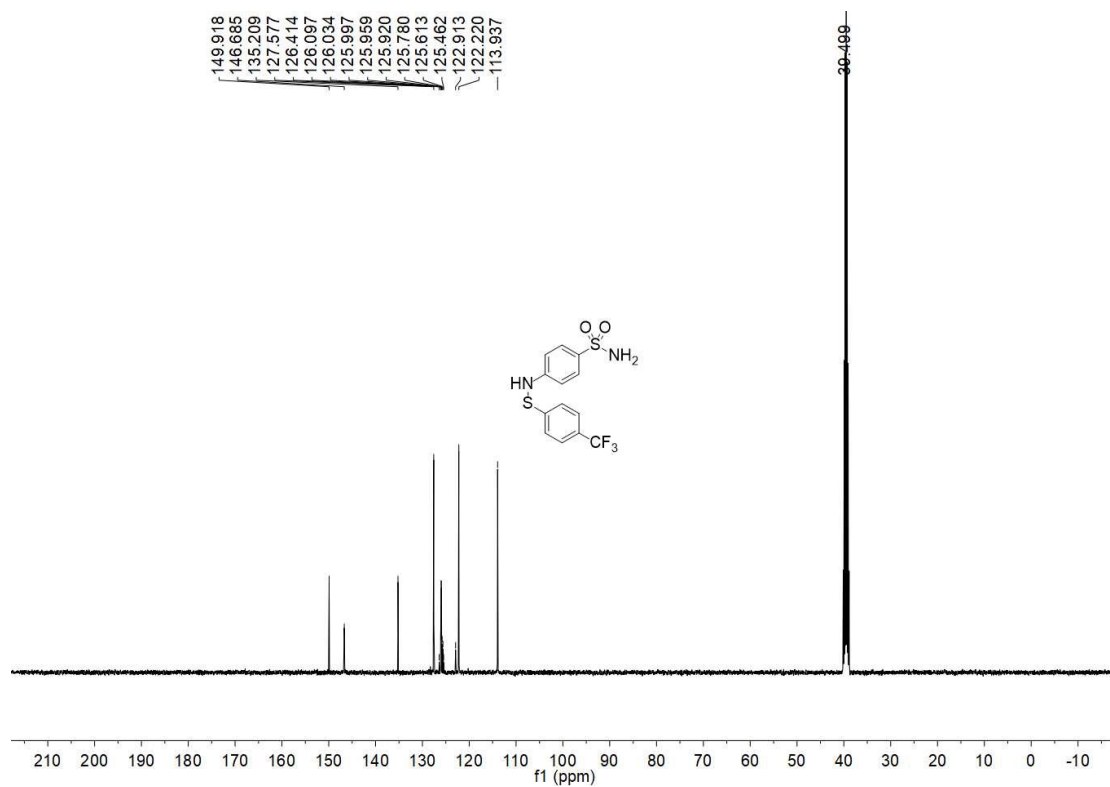

<sup>13</sup>C NMR (101 MHz, DMSO-*d*<sub>6</sub>) spectrum of Compound 3h

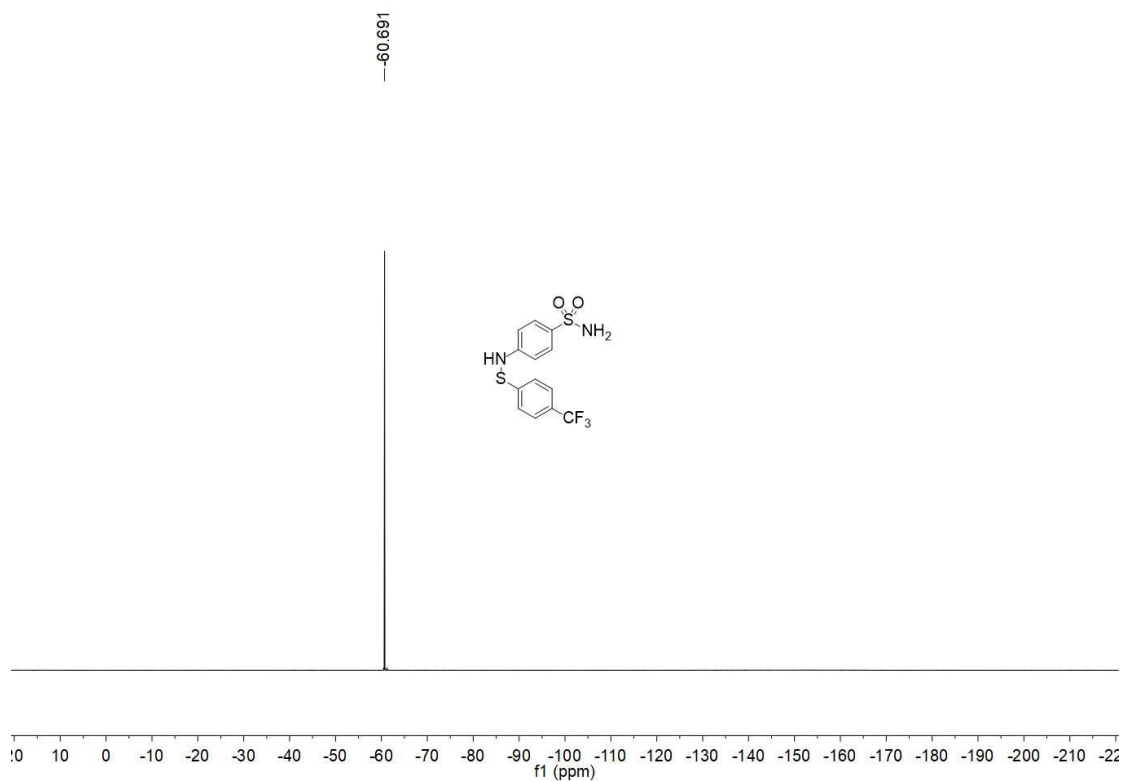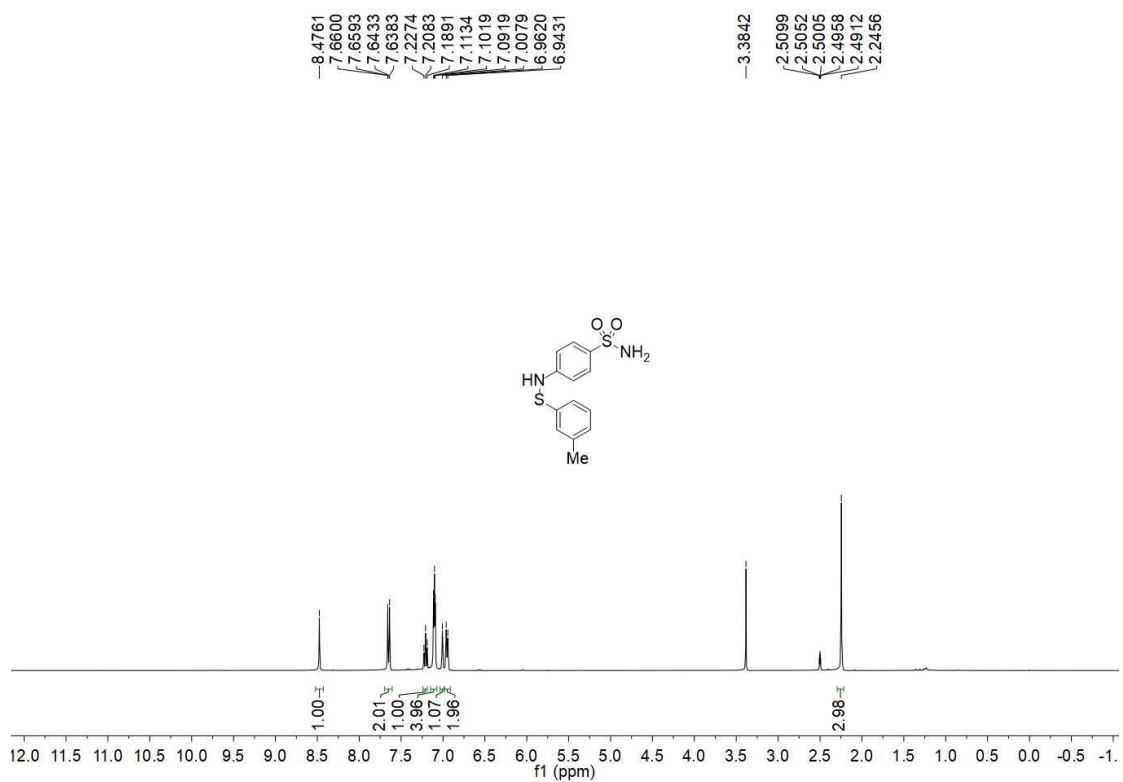

$^1\text{H}$  NMR (400 MHz,  $\text{DMSO-}d_6$ ) spectrum of Compound 3i

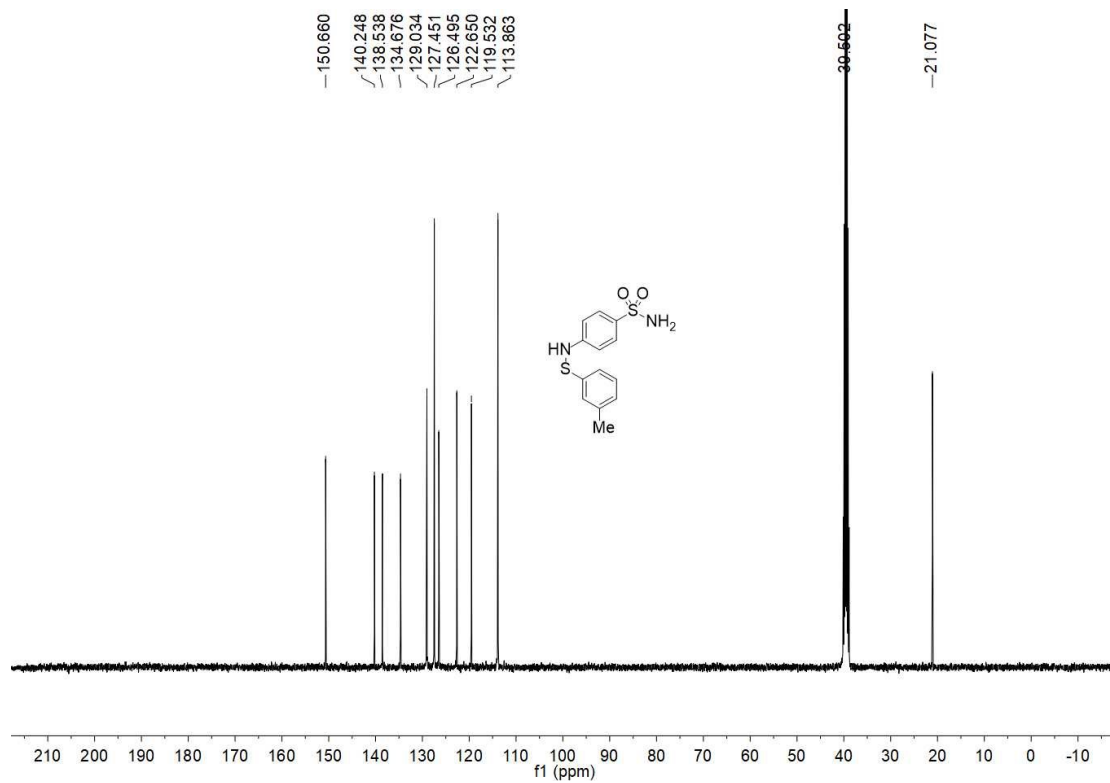

<sup>13</sup>C NMR (101 MHz, DMSO-*d*<sub>6</sub>) spectrum of Compound 3i

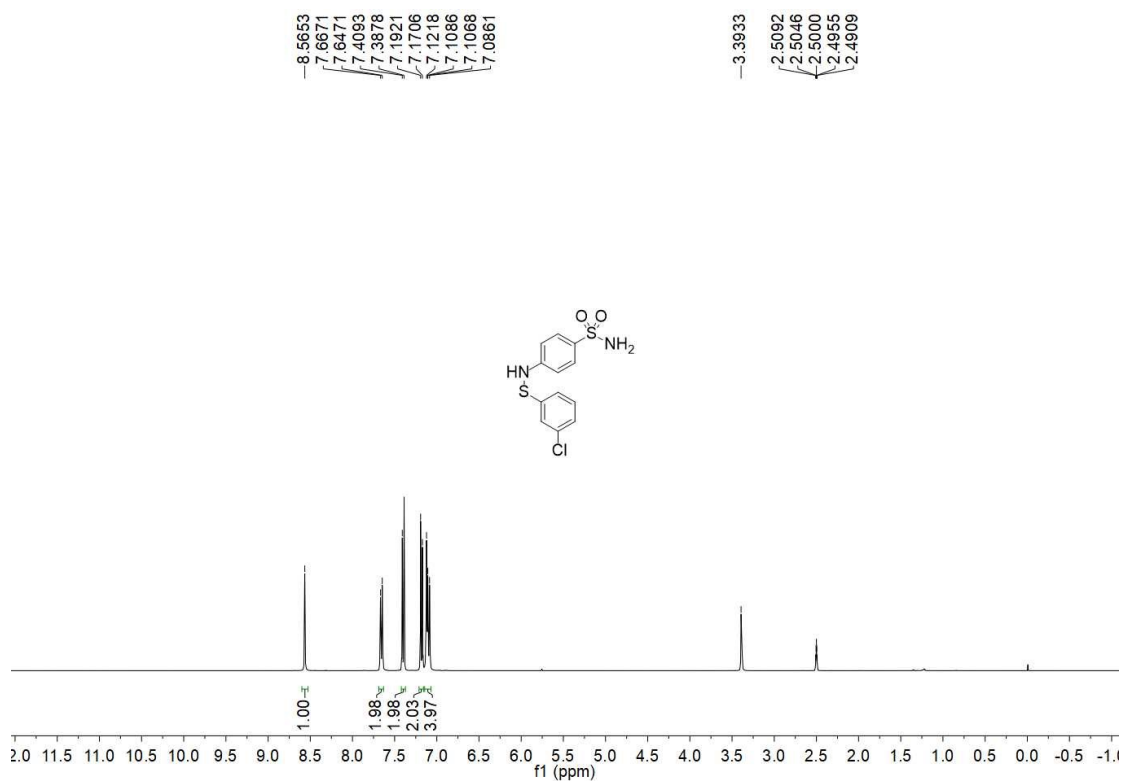

<sup>1</sup>H NMR (400 MHz, DMSO-*d*<sub>6</sub>) spectrum of Compound 3j

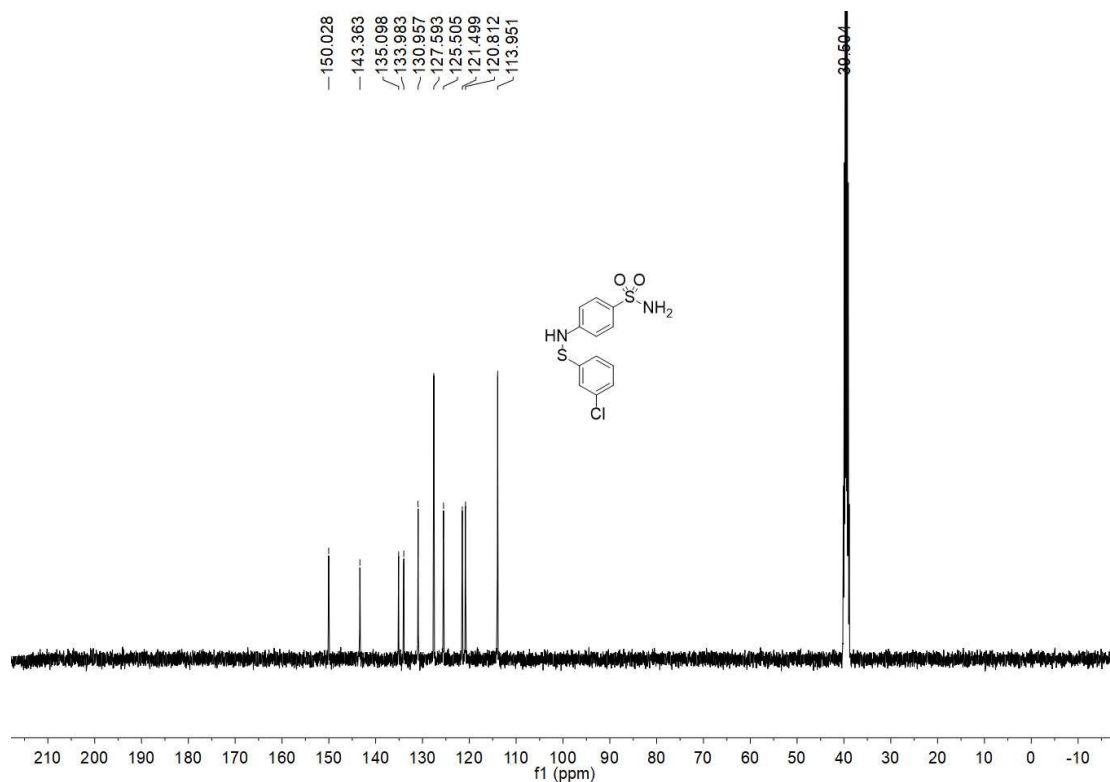

<sup>13</sup>C NMR (101 MHz, DMSO-*d*<sub>6</sub>) spectrum of Compound 3j

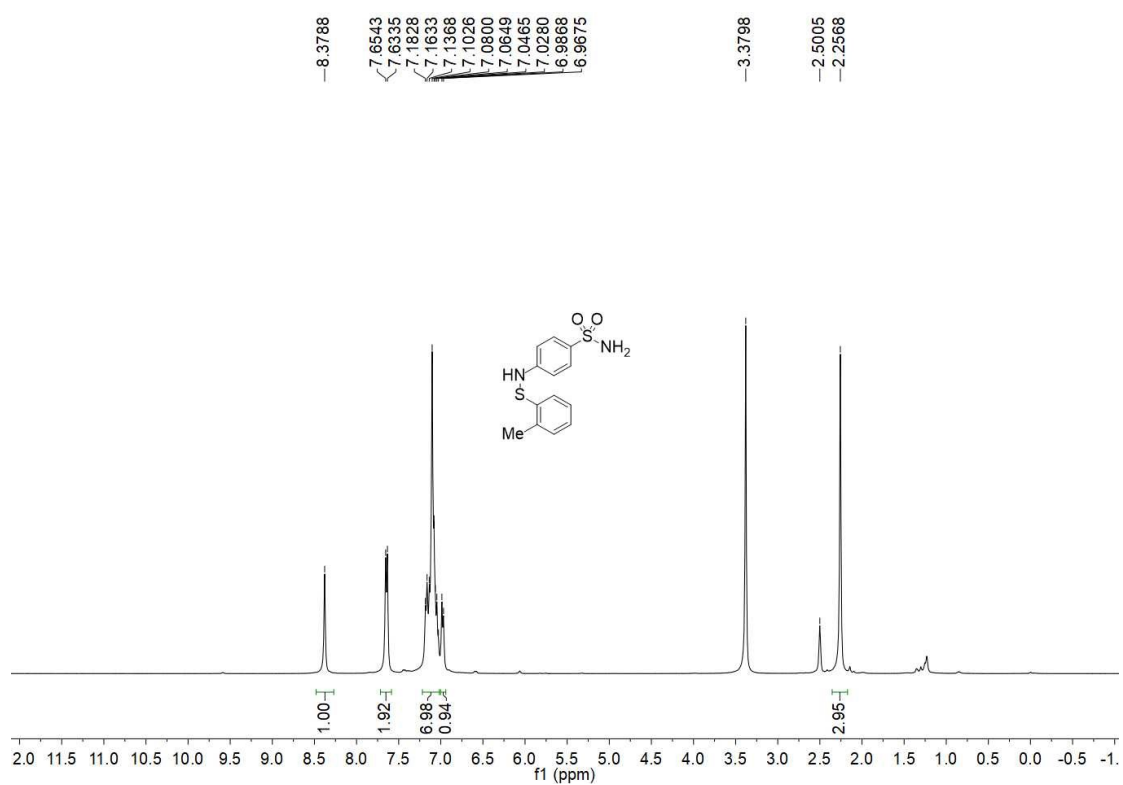

<sup>1</sup>H NMR (400 MHz, DMSO-*d*<sub>6</sub>) spectrum of Compound 3k

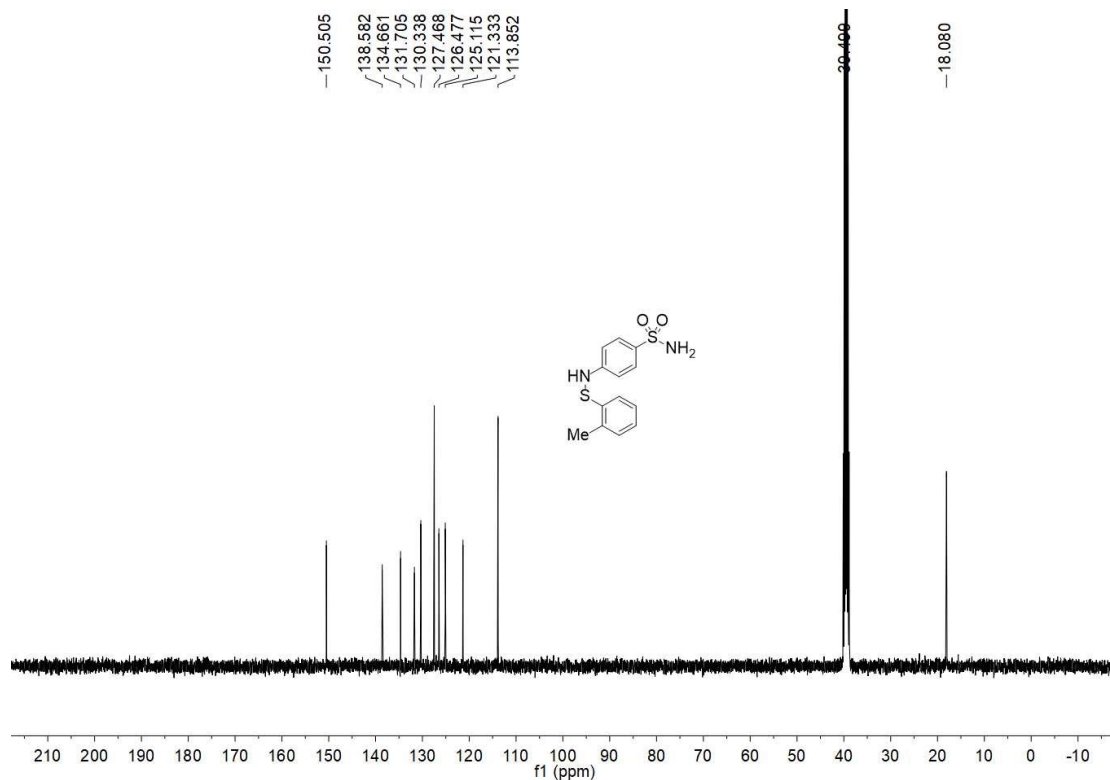

<sup>13</sup>C NMR (101 MHz, DMSO-*d*<sub>6</sub>) spectrum of Compound 3k

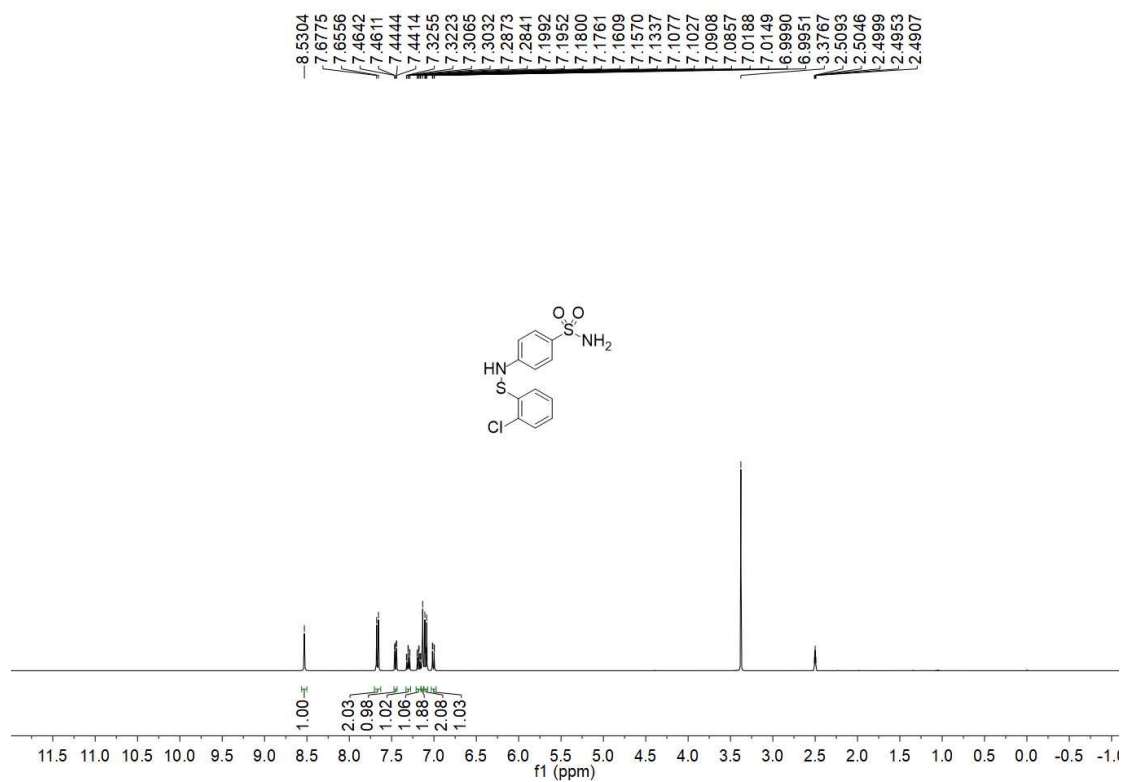

<sup>1</sup>H NMR (400 MHz, DMSO-*d*<sub>6</sub>) spectrum of Compound 3l

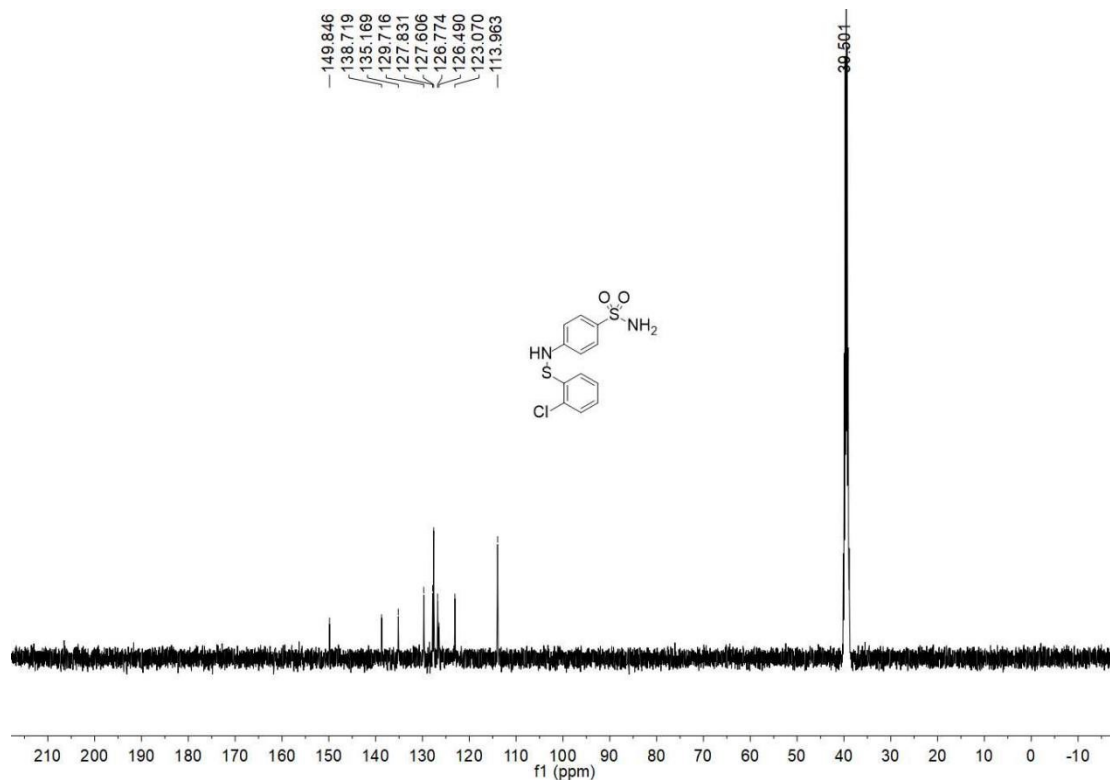

$^{13}\text{C}$  NMR (101 MHz, DMSO- $d_6$ ) spectrum of Compound 3l

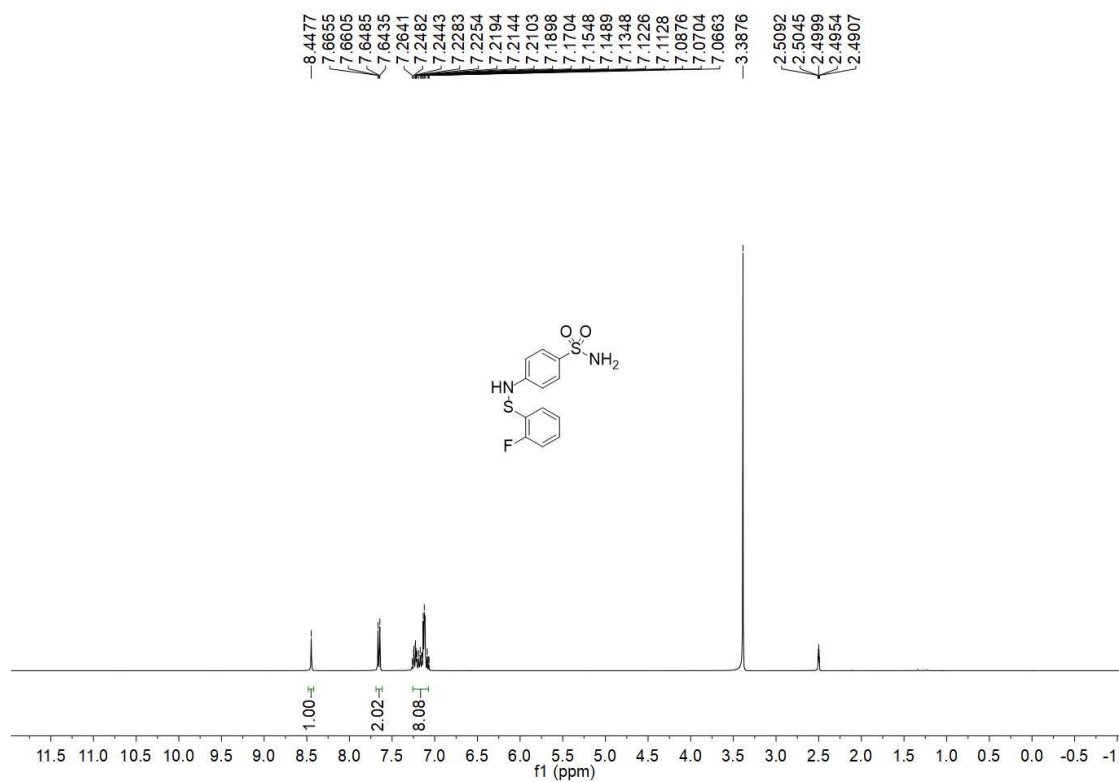

$^1\text{H}$  NMR (400 MHz, DMSO- $d_6$ ) spectrum of Compound 3m

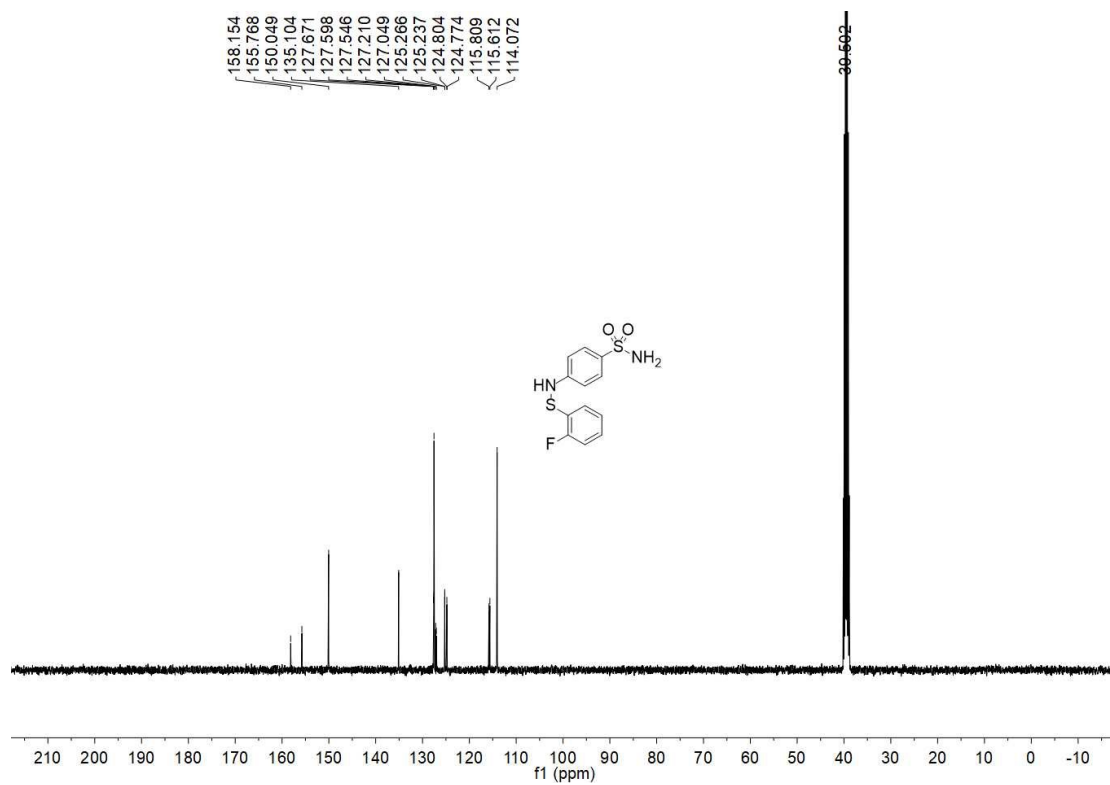

$^{13}\text{C}$  NMR (101 MHz,  $\text{DMSO-}d_6$ ) spectrum of Compound **3m**

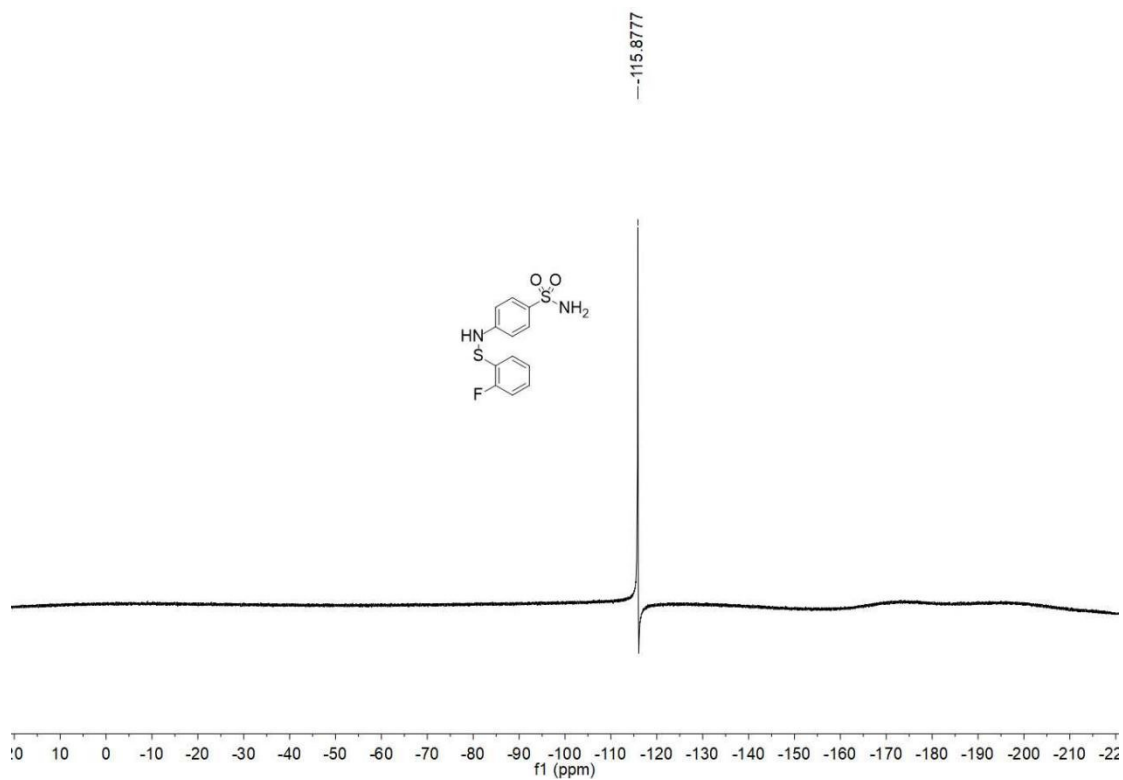

$^{19}\text{F}$  NMR (376 MHz,  $\text{DMSO-}d_6$ ) spectrum of Compound **3m**

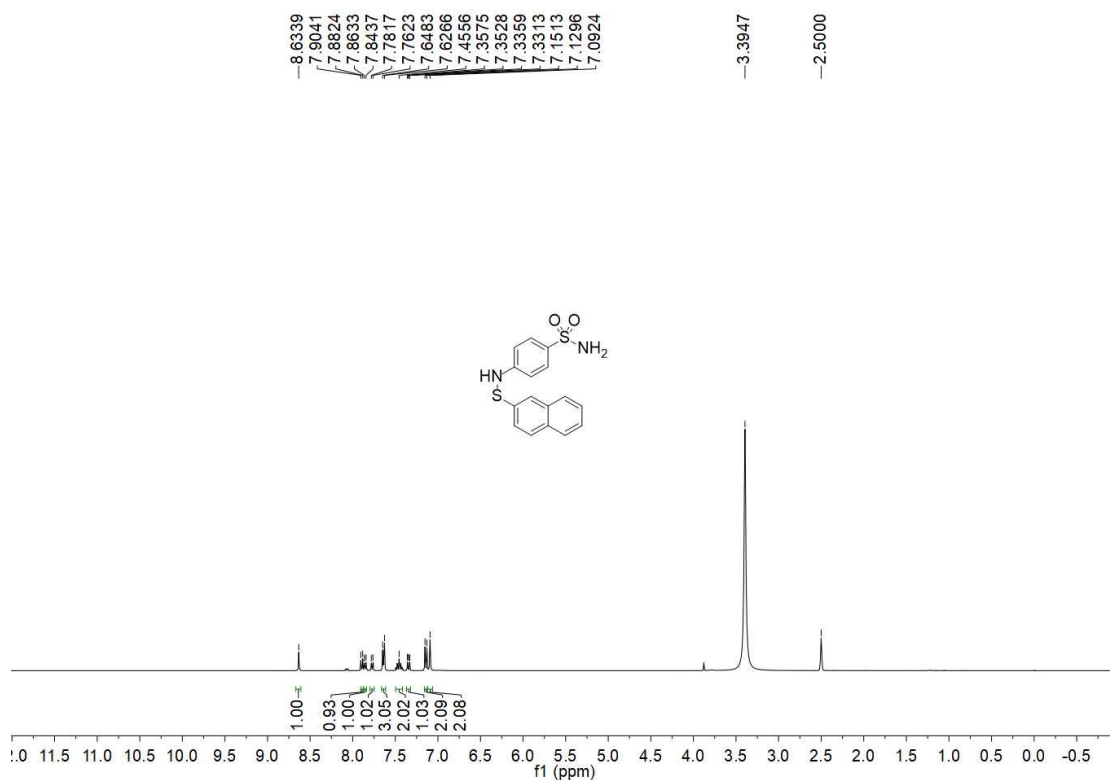

<sup>1</sup>H NMR (400 MHz, DMSO-*d*<sub>6</sub>) spectrum of Compound 3n

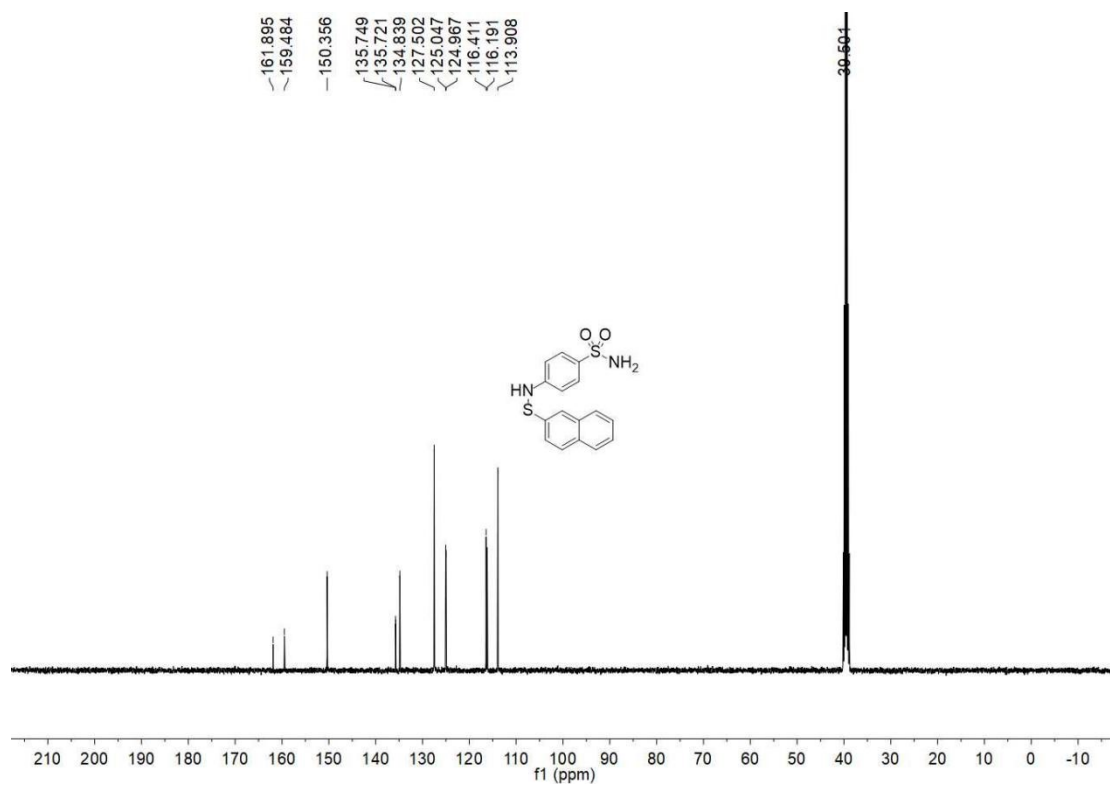

<sup>13</sup>C NMR (101 MHz, DMSO-*d*<sub>6</sub>) spectrum of Compound 3n



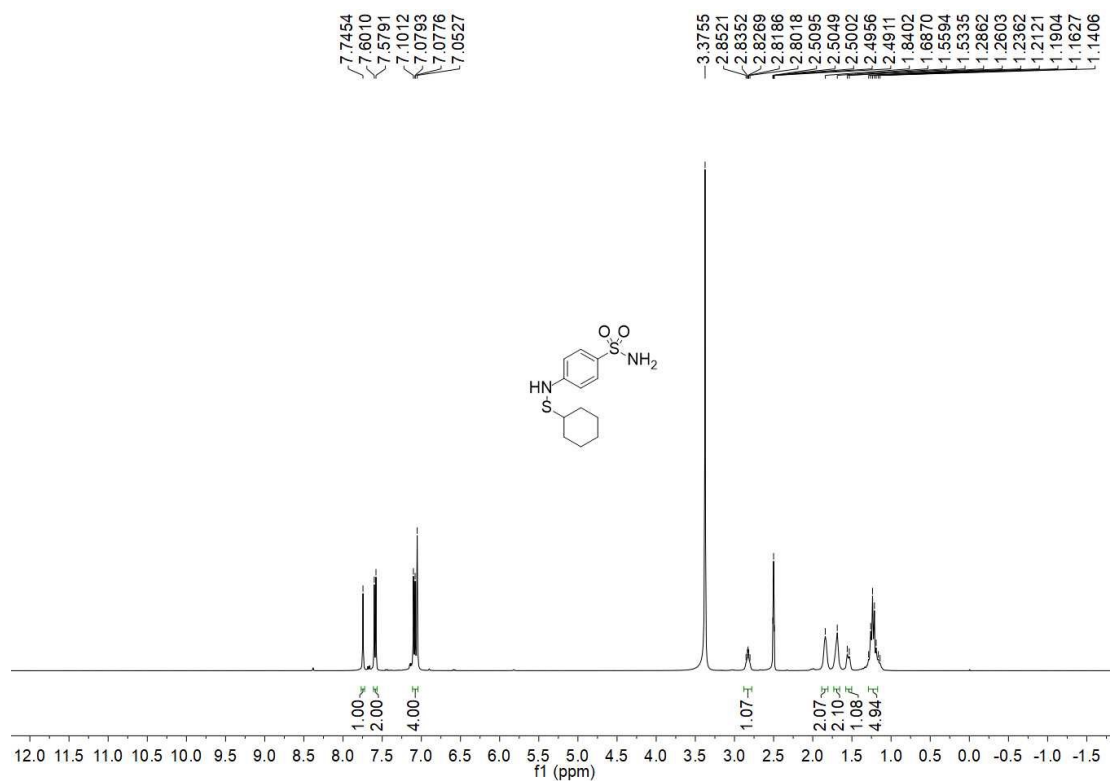

<sup>1</sup>H NMR (400 MHz, DMSO-*d*<sub>6</sub>) spectrum of Compound 30

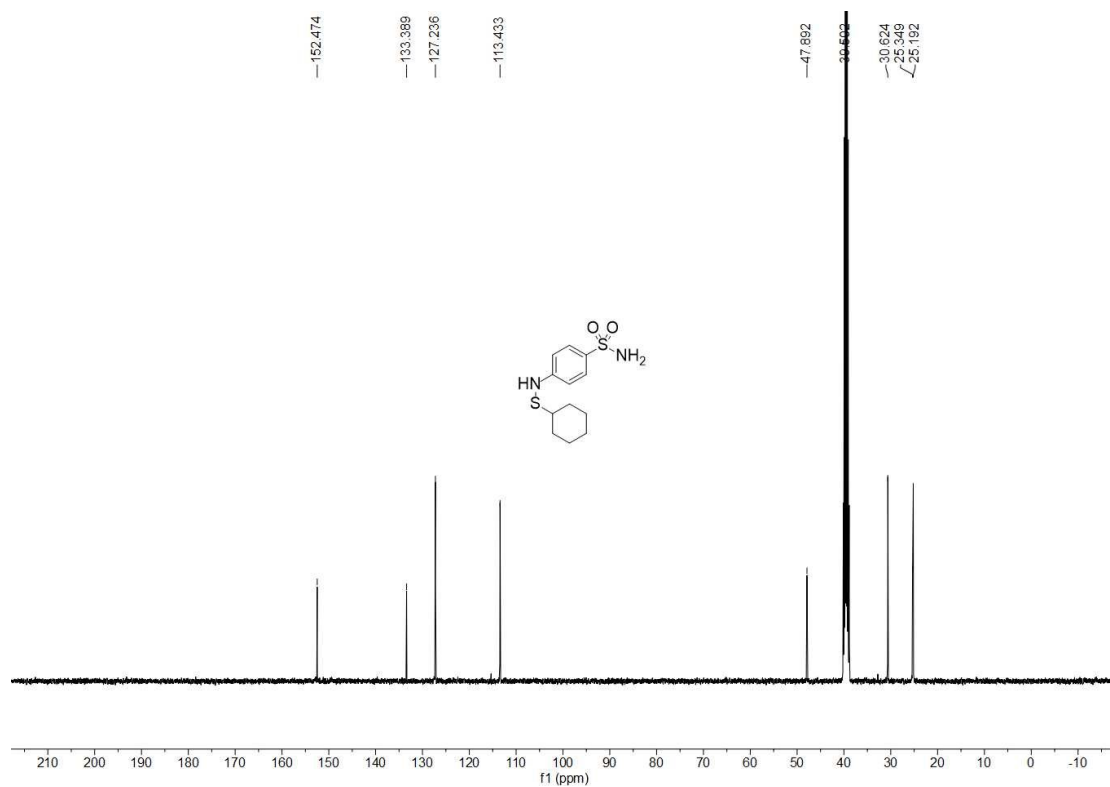

<sup>13</sup>C NMR (101 MHz, DMSO-*d*<sub>6</sub>) spectrum of Compound 30

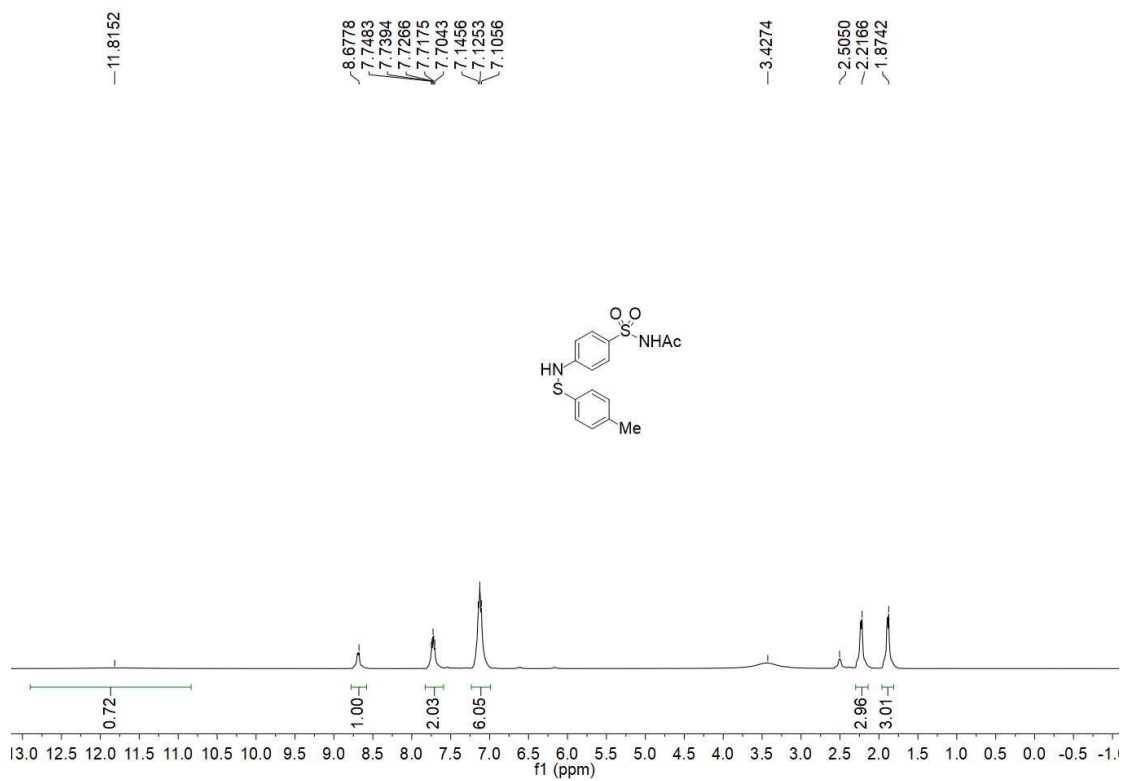

<sup>1</sup>H NMR (400 MHz, DMSO-*d*<sub>6</sub>) spectrum of Compound 4a

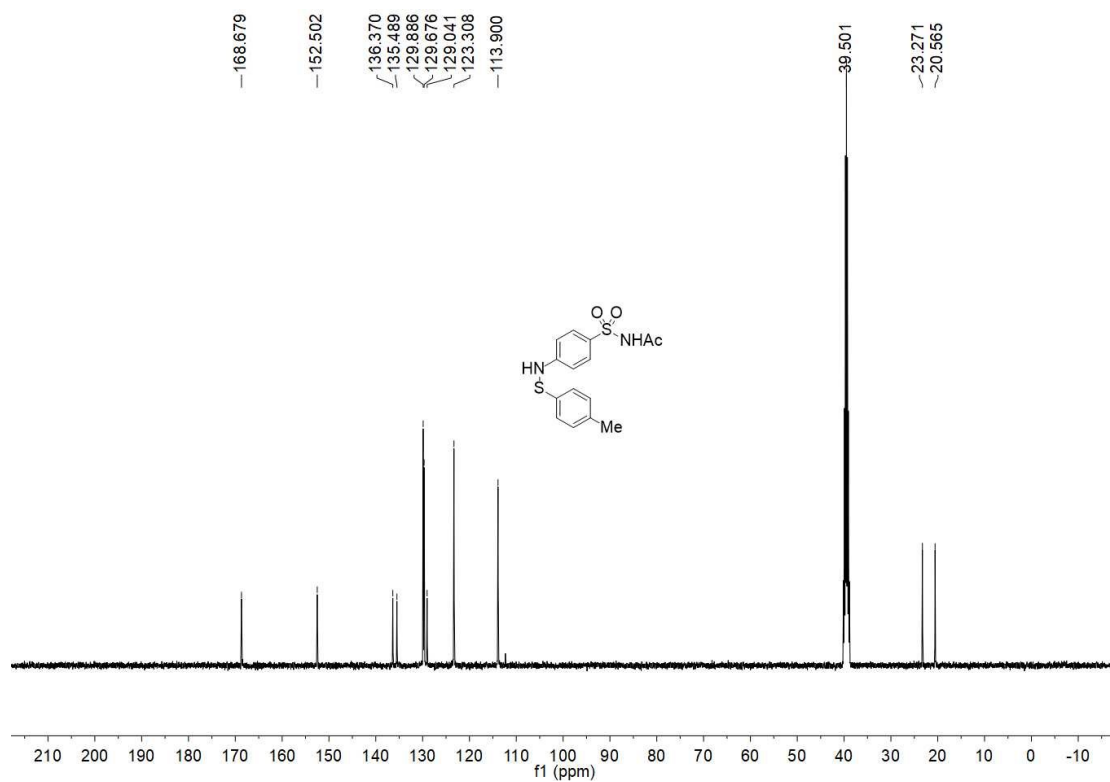

<sup>13</sup>C NMR (101 MHz, DMSO-*d*<sub>6</sub>) spectrum of Compound 4a

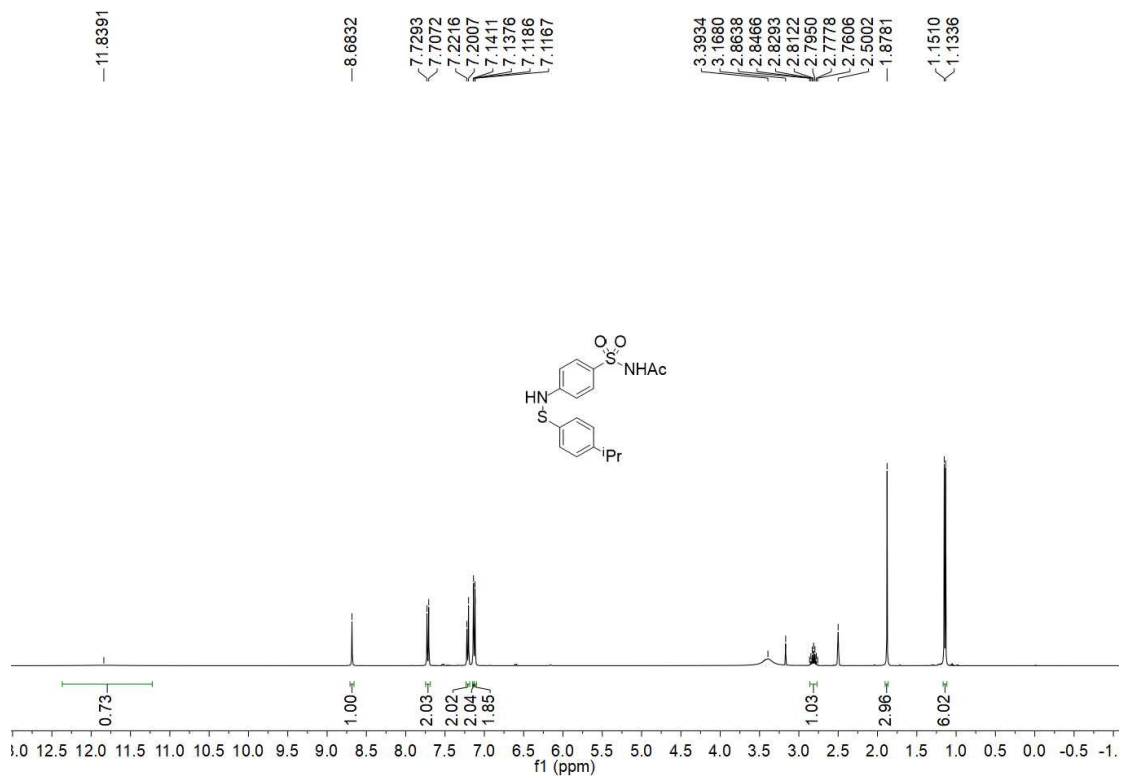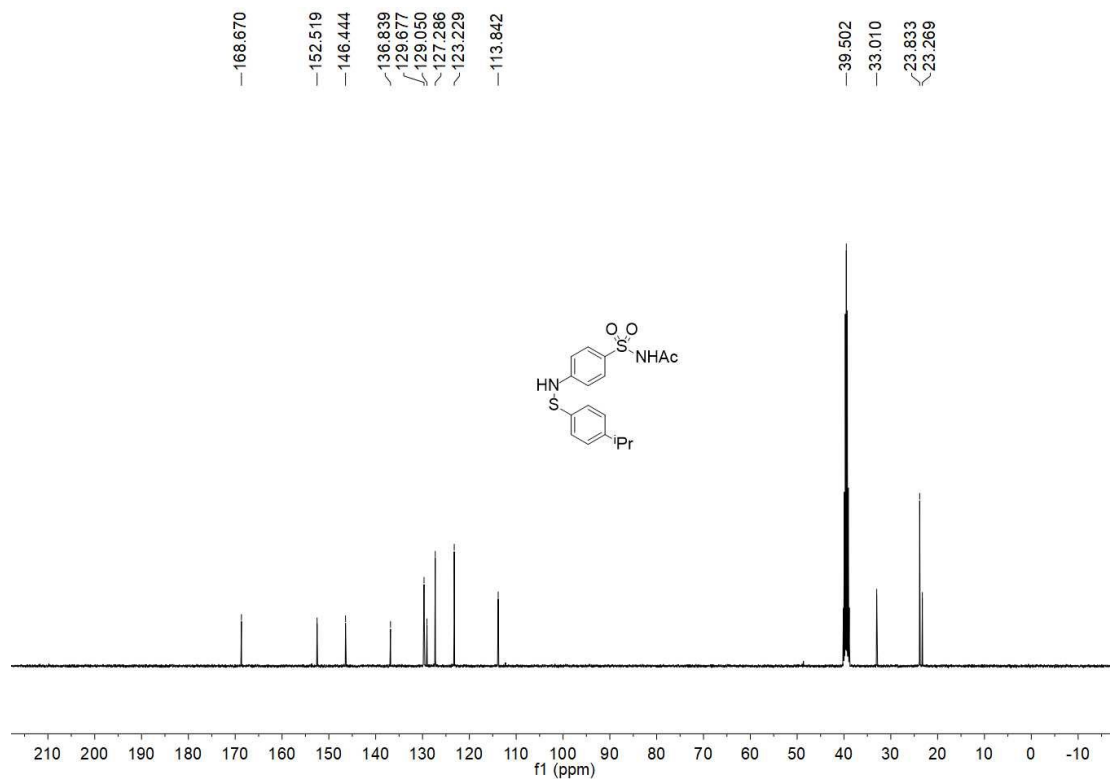

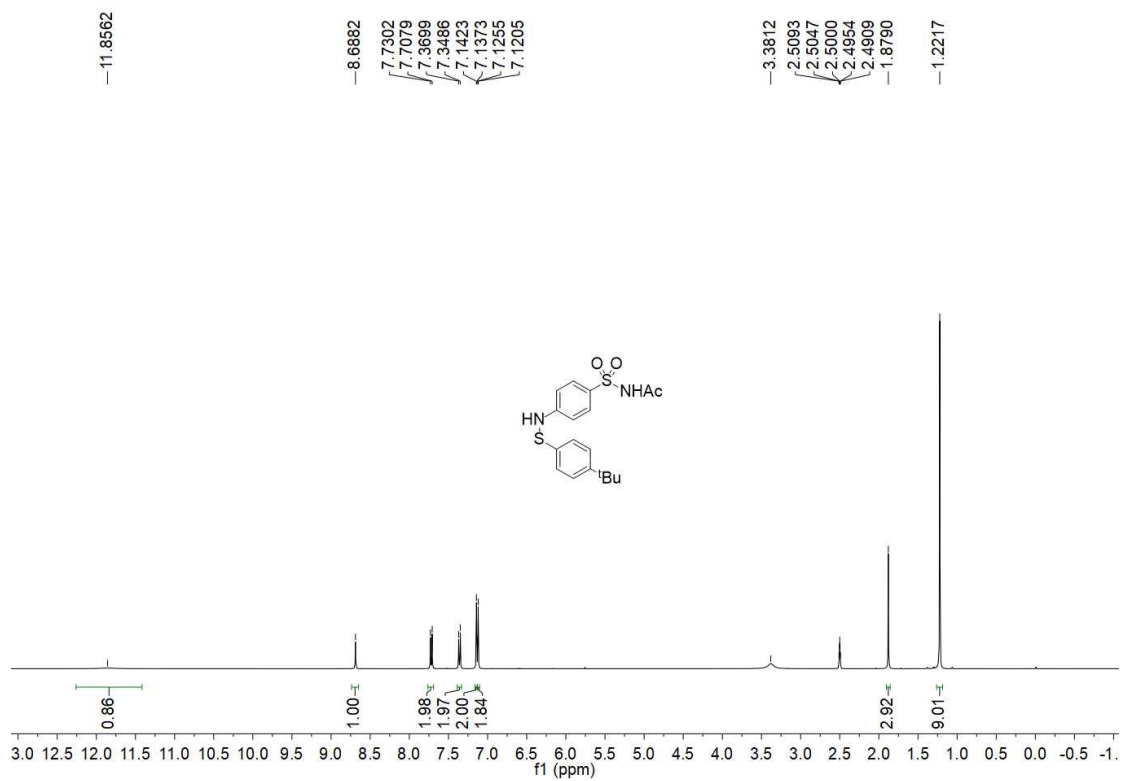

<sup>1</sup>H NMR (400 MHz, DMSO-*d*<sub>6</sub>) spectrum of Compound 4c

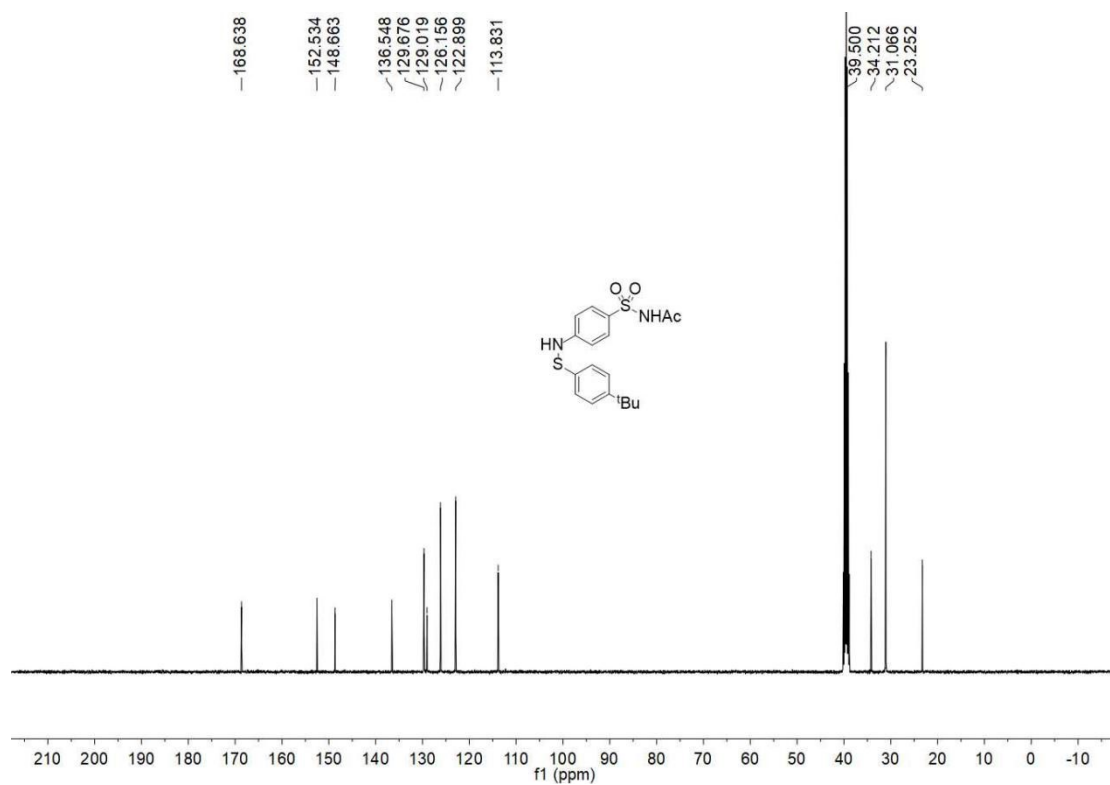

<sup>13</sup>C NMR (101 MHz, DMSO-*d*<sub>6</sub>) spectrum of Compound 4c

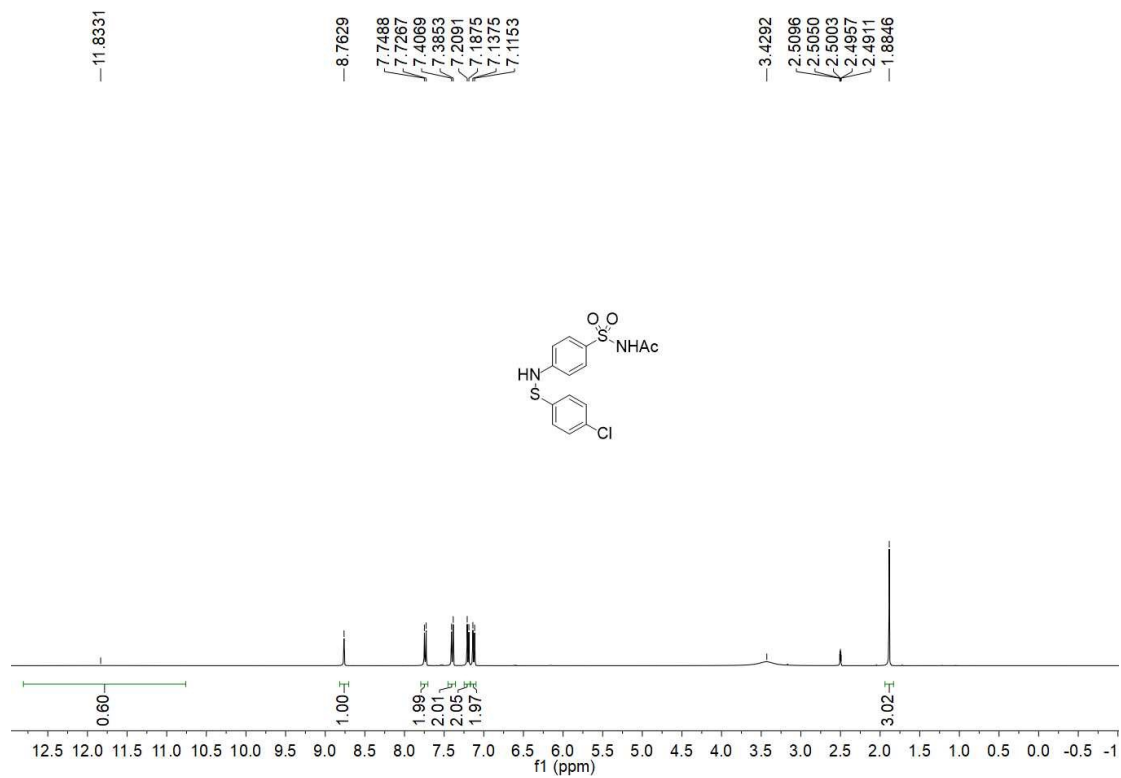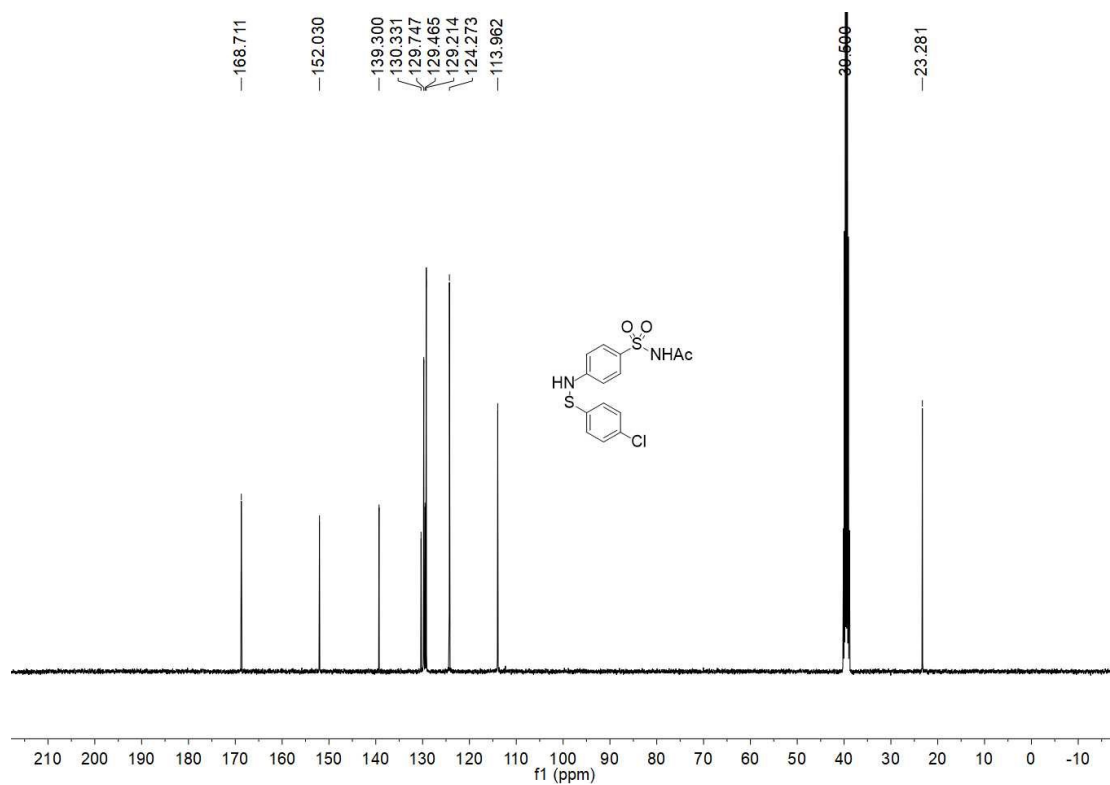

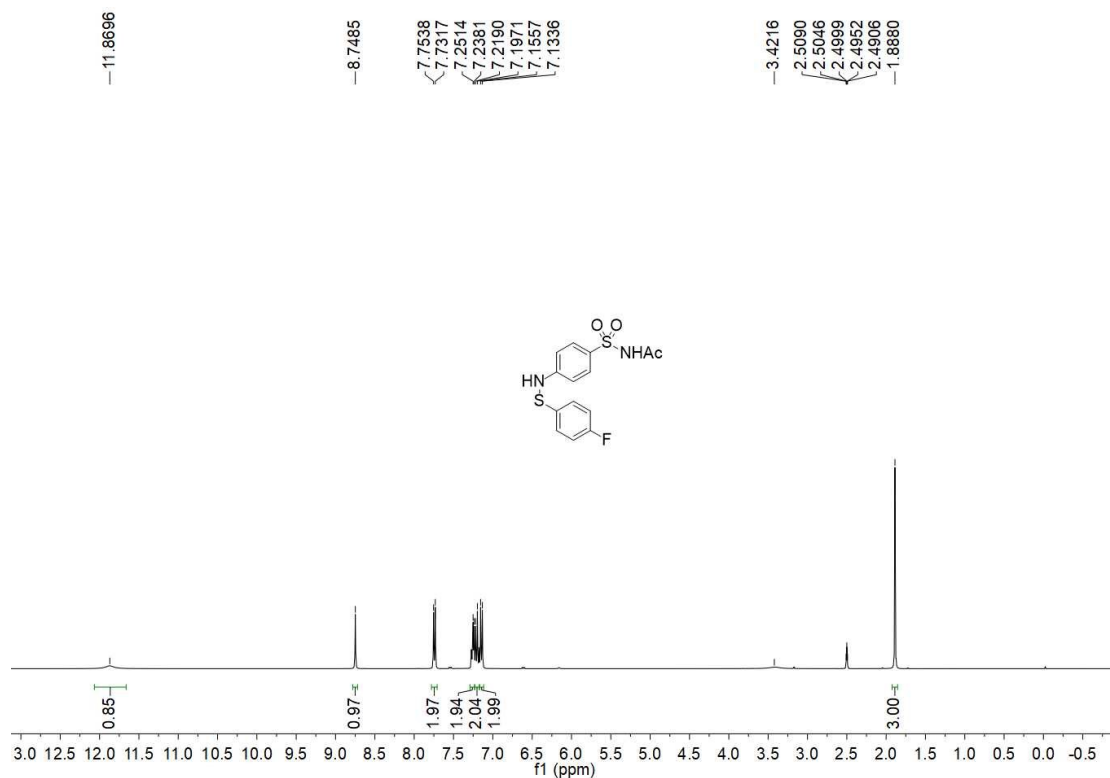

<sup>1</sup>H NMR (400 MHz, DMSO-*d*<sub>6</sub>) spectrum of Compound 4e

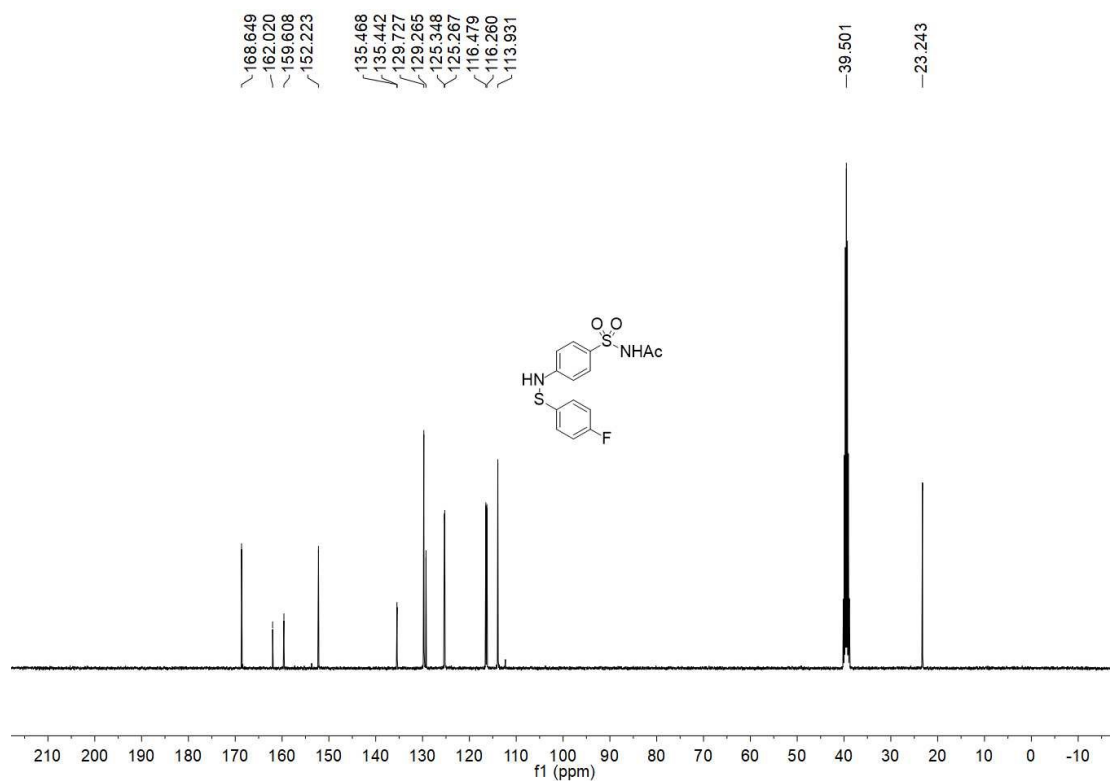

<sup>13</sup>C NMR (101 MHz, DMSO-*d*<sub>6</sub>) spectrum of Compound 4e

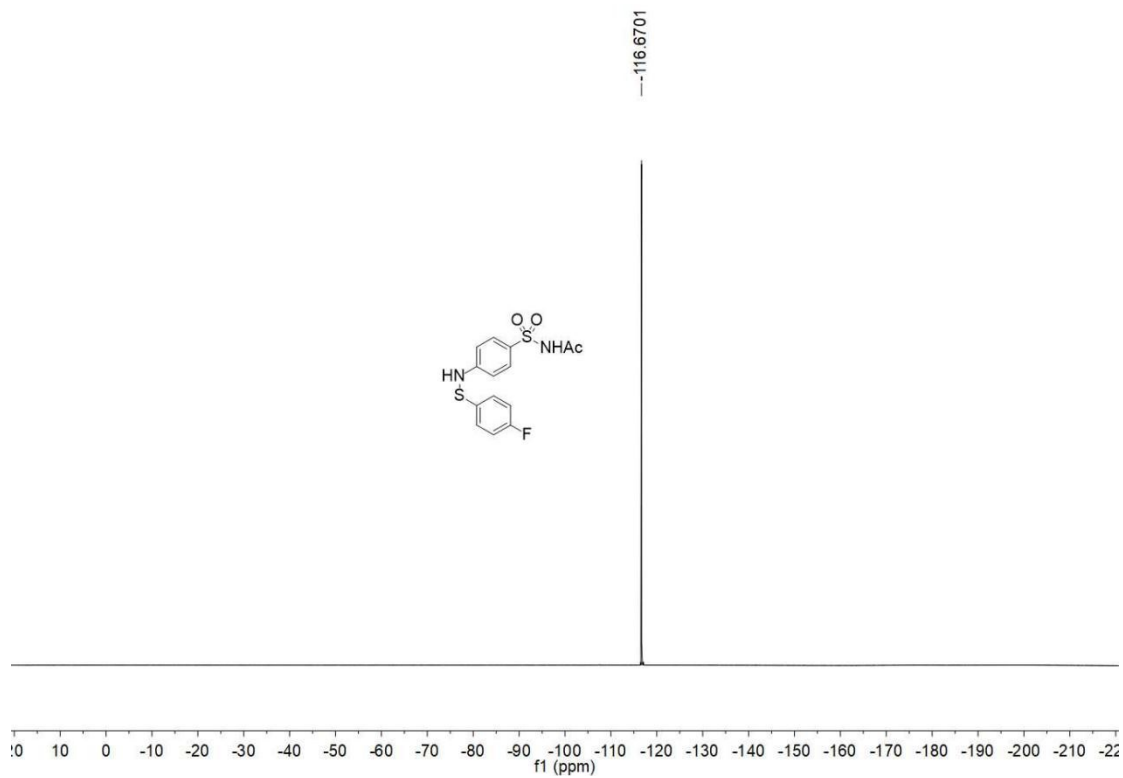

$^{19}\text{F}$  NMR (376 MHz,  $\text{DMSO-}d_6$ ) spectrum of Compound 4e

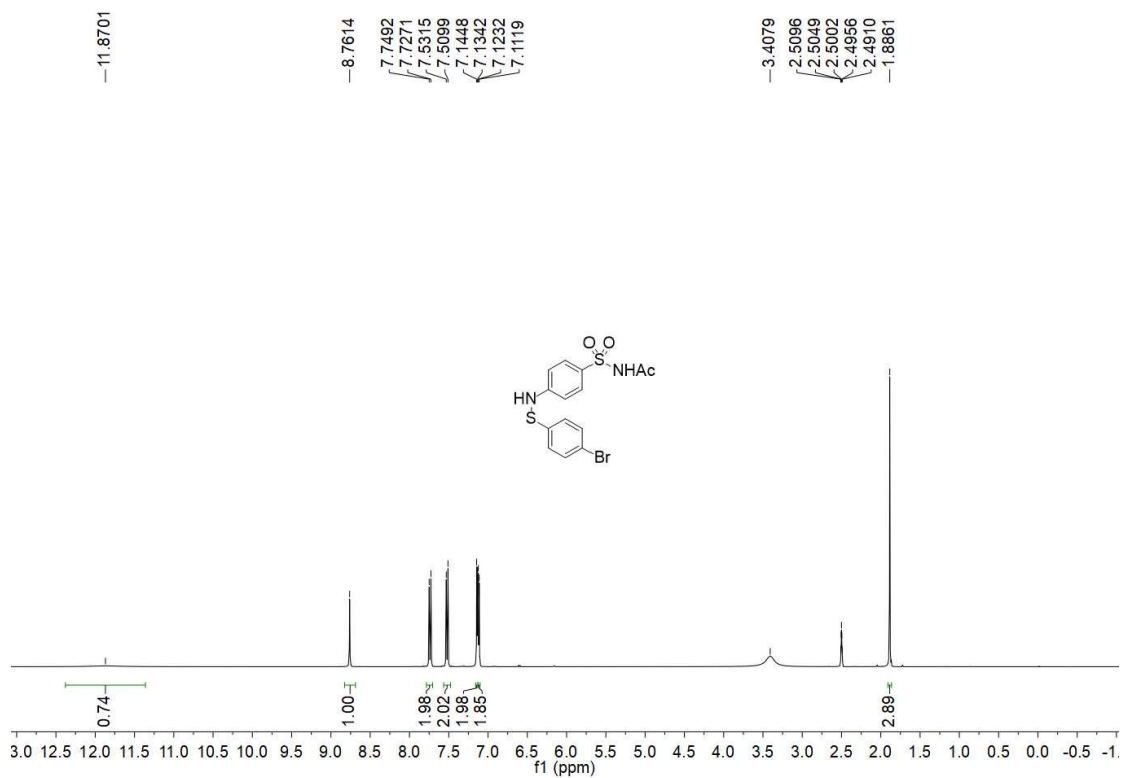

$^1\text{H}$  NMR (400 MHz,  $\text{DMSO-}d_6$ ) spectrum of Compound 4f

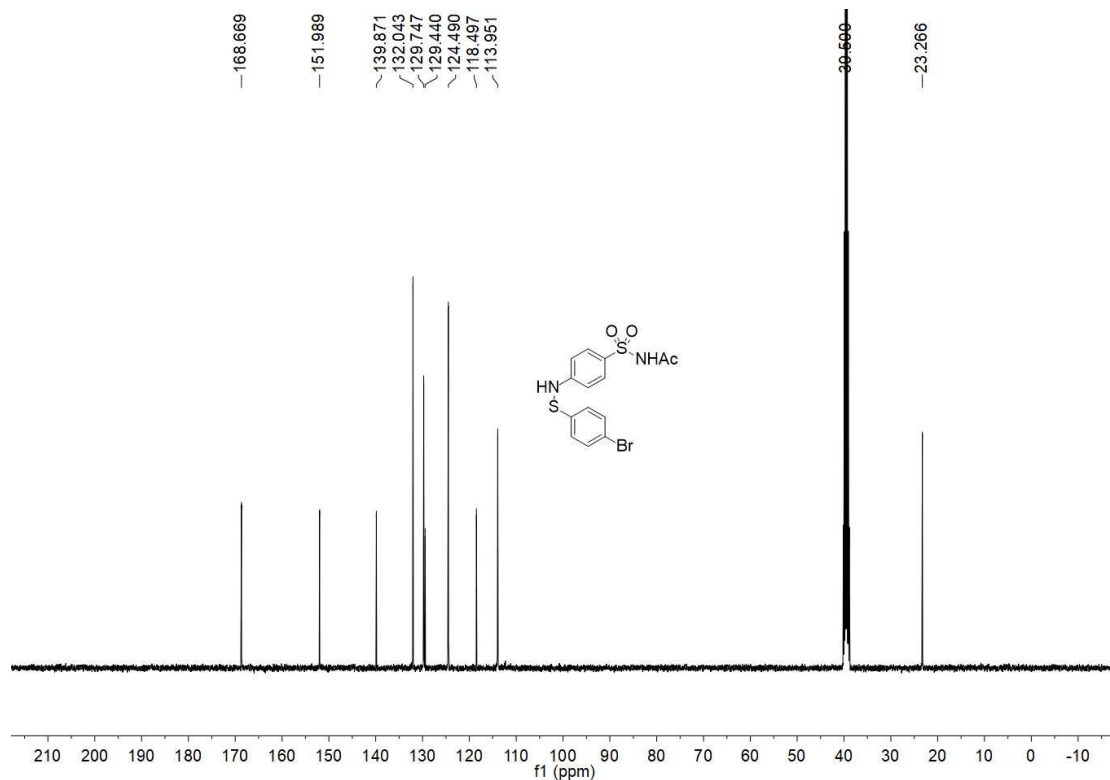

$^{13}\text{C}$  NMR (101 MHz,  $\text{DMSO-}d_6$ ) spectrum of Compound 4f

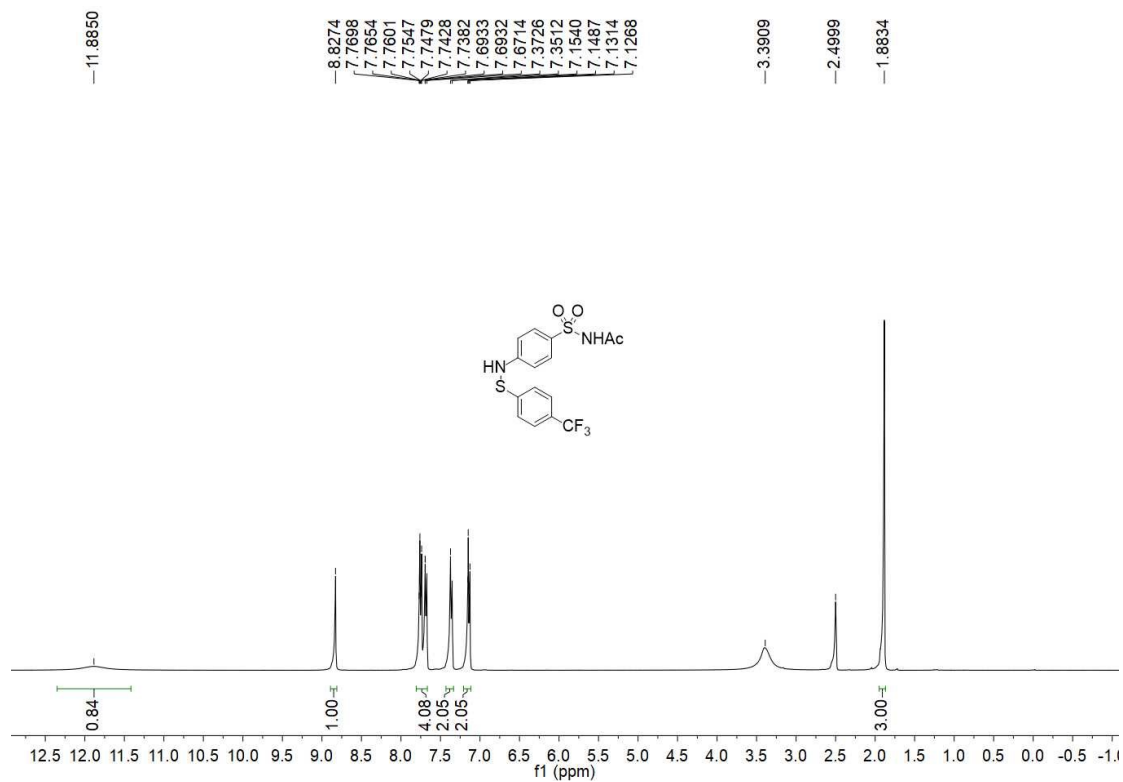

$^1\text{H}$  NMR (400 MHz,  $\text{DMSO-}d_6$ ) spectrum of Compound 4g



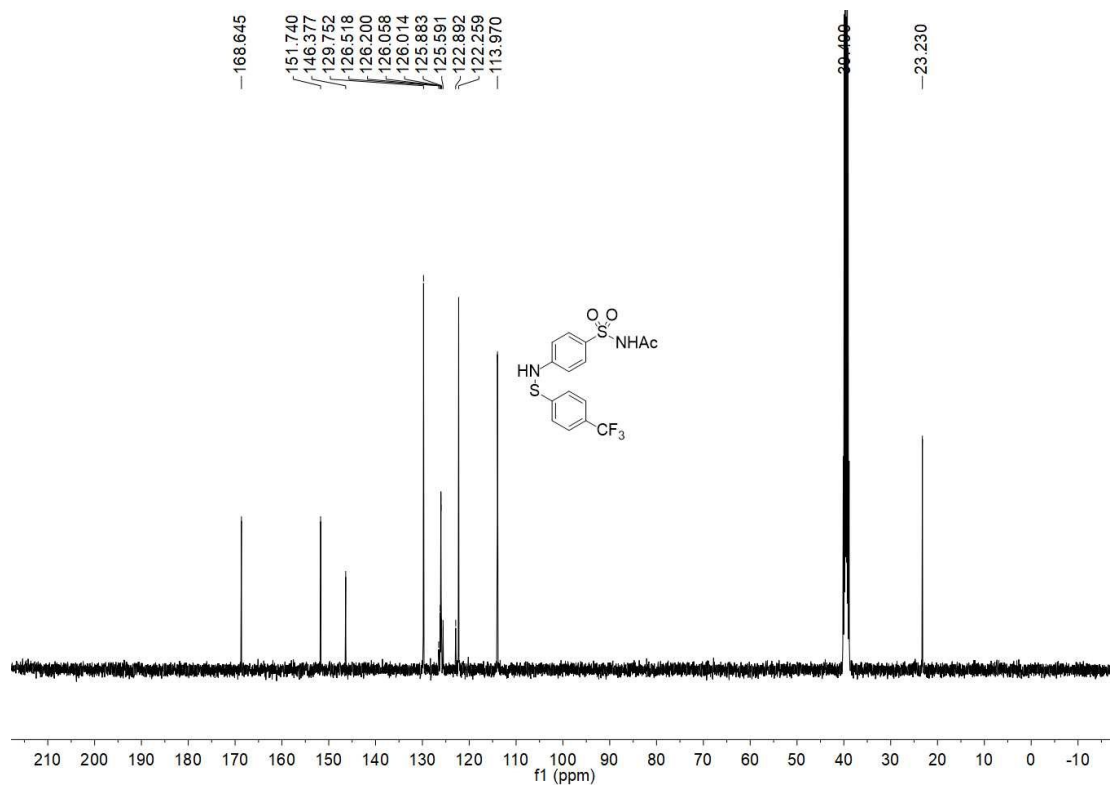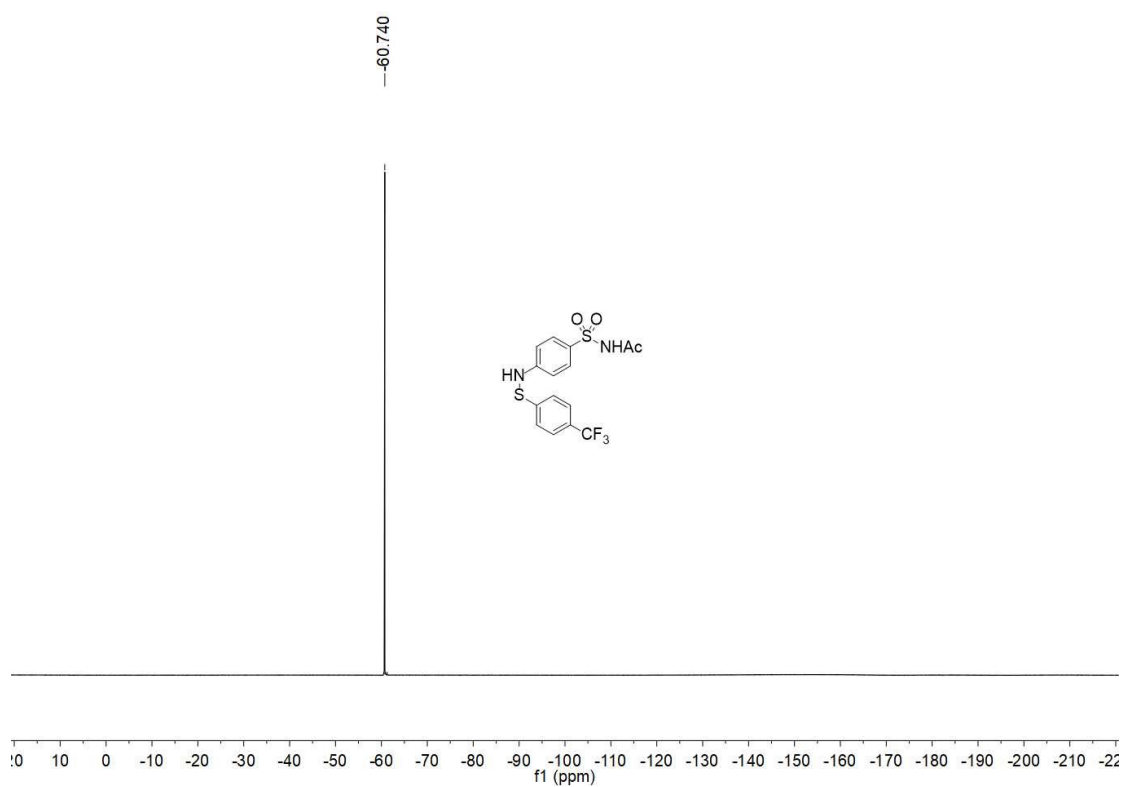

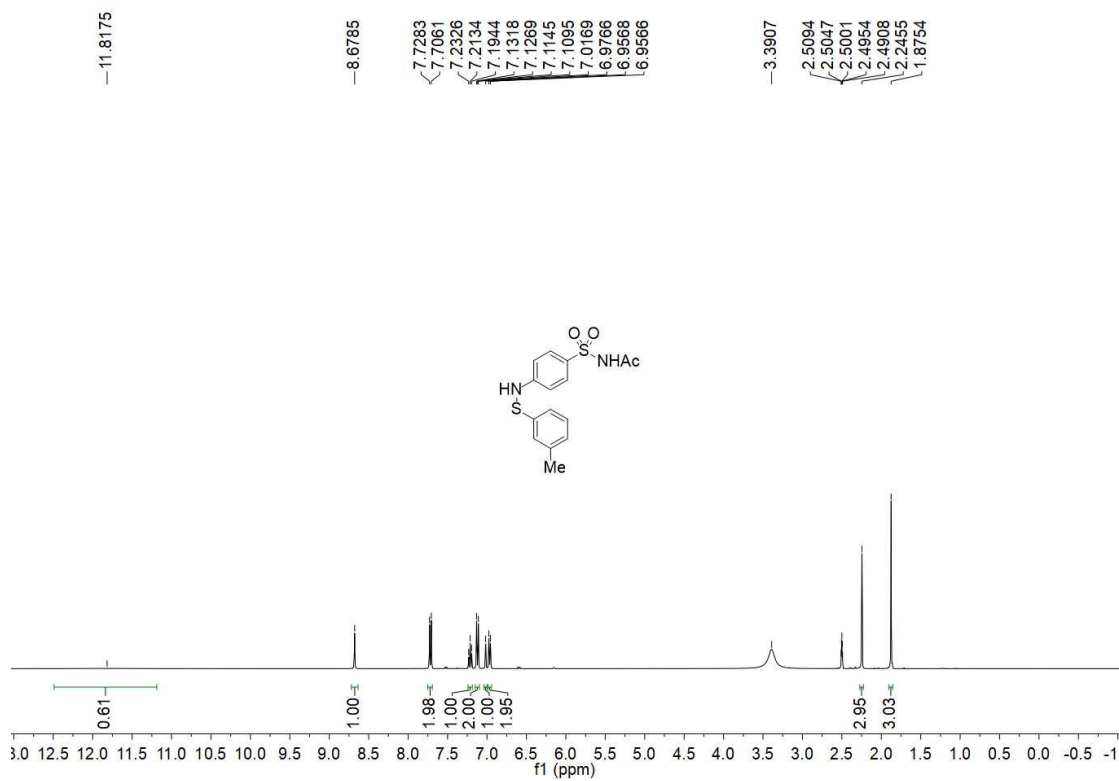

<sup>1</sup>H NMR (400 MHz, DMSO-*d*<sub>6</sub>) spectrum of Compound 4h

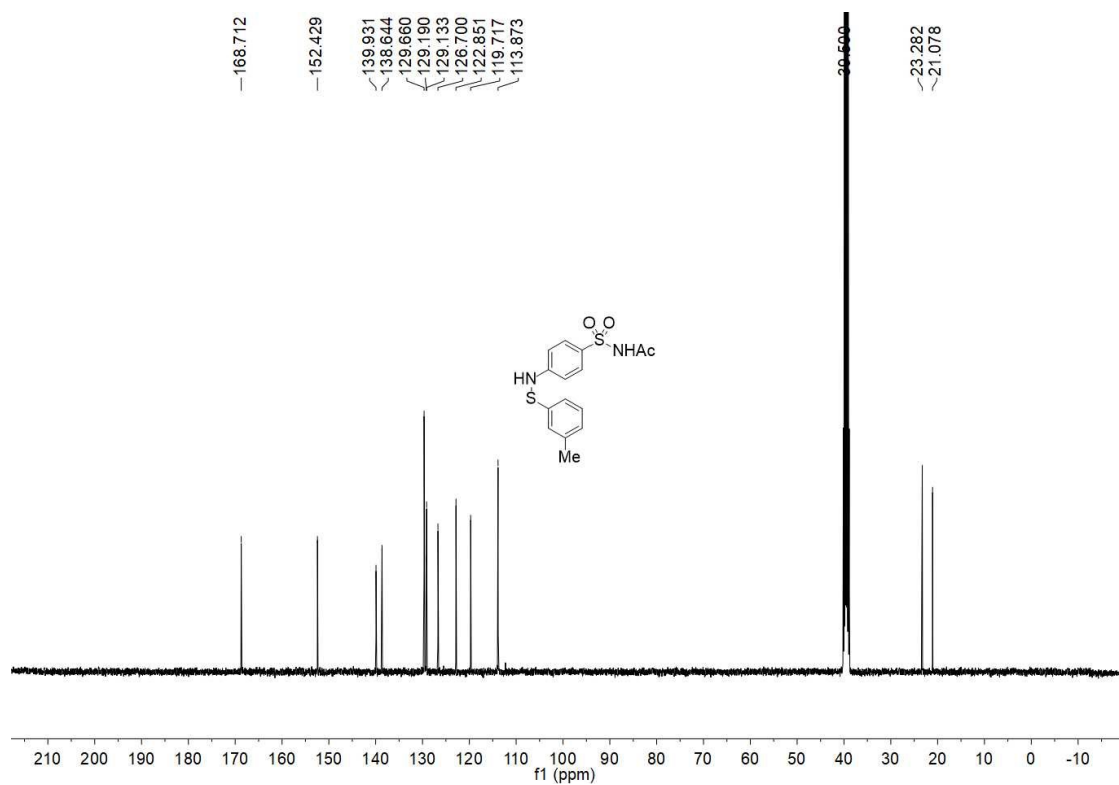

<sup>13</sup>C NMR (101 MHz, DMSO-*d*<sub>6</sub>) spectrum of Compound 4h

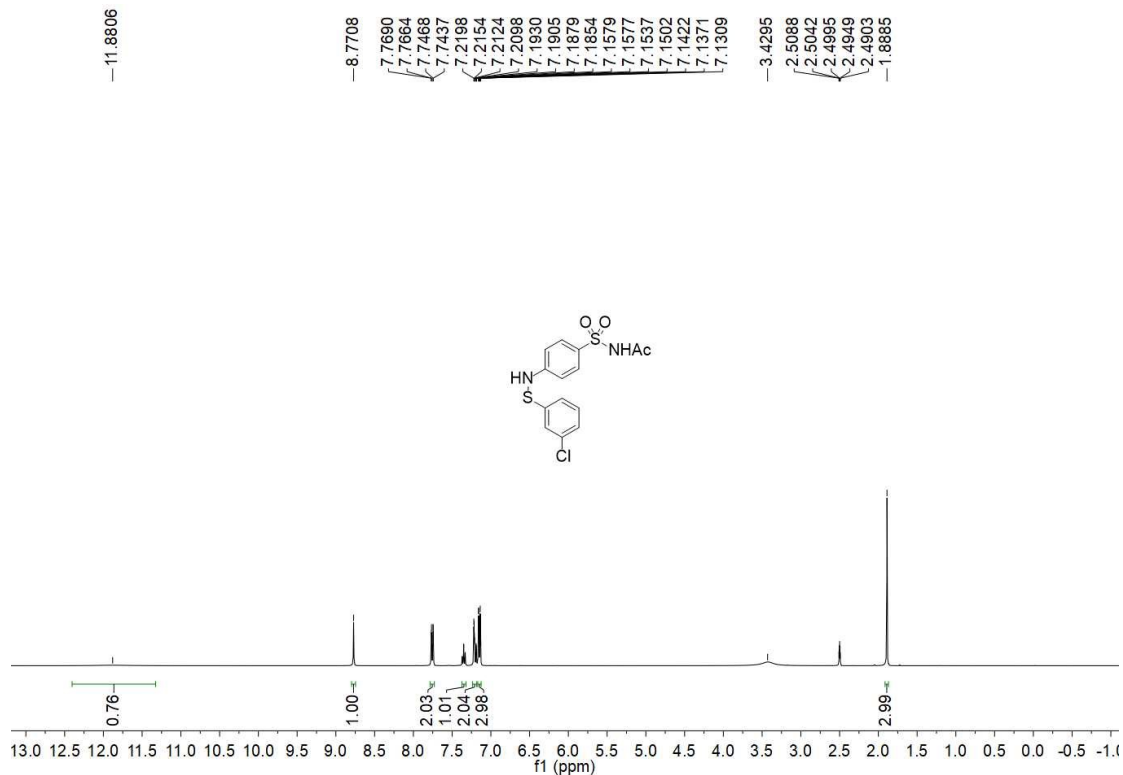

$^1\text{H}$  NMR (400 MHz,  $\text{DMSO-}d_6$ ) spectrum of Compound **4i**

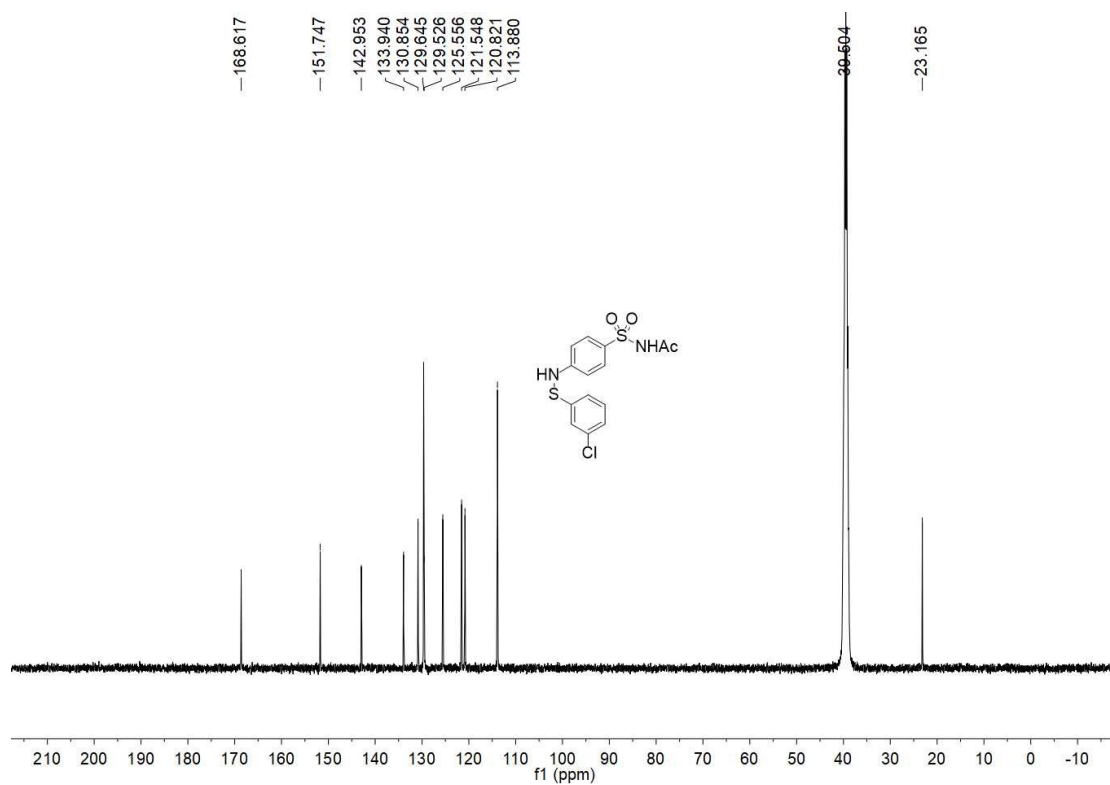

$^{13}\text{C}$  NMR (101 MHz,  $\text{DMSO-}d_6$ ) spectrum of Compound **4i**

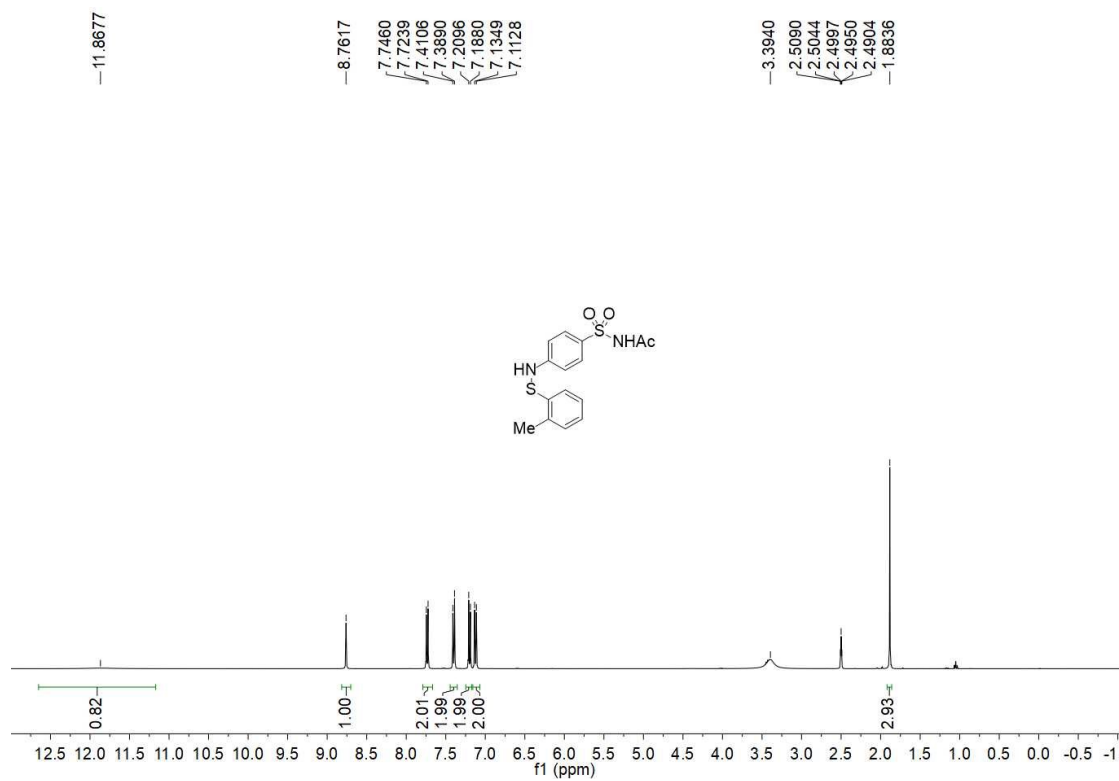

$^1\text{H}$  NMR (400 MHz,  $\text{DMSO-}d_6$ ) spectrum of Compound 4j

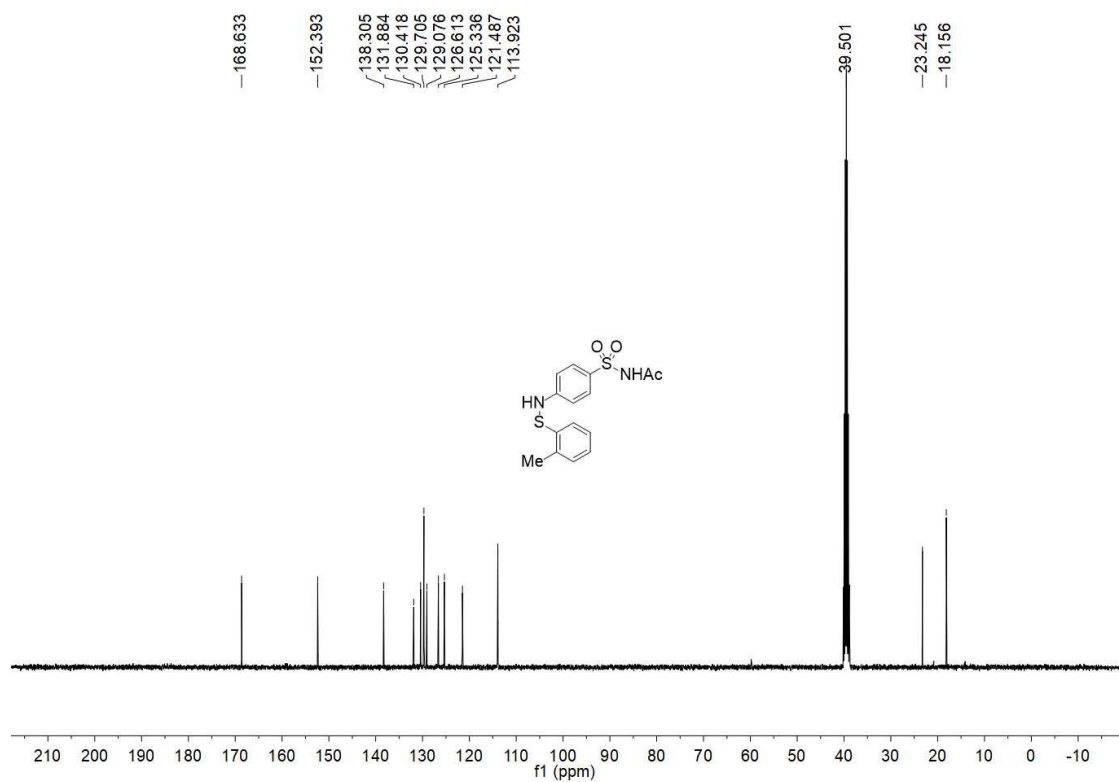

$^{13}\text{C}$  NMR (101 MHz,  $\text{DMSO-}d_6$ ) spectrum of Compound 4j

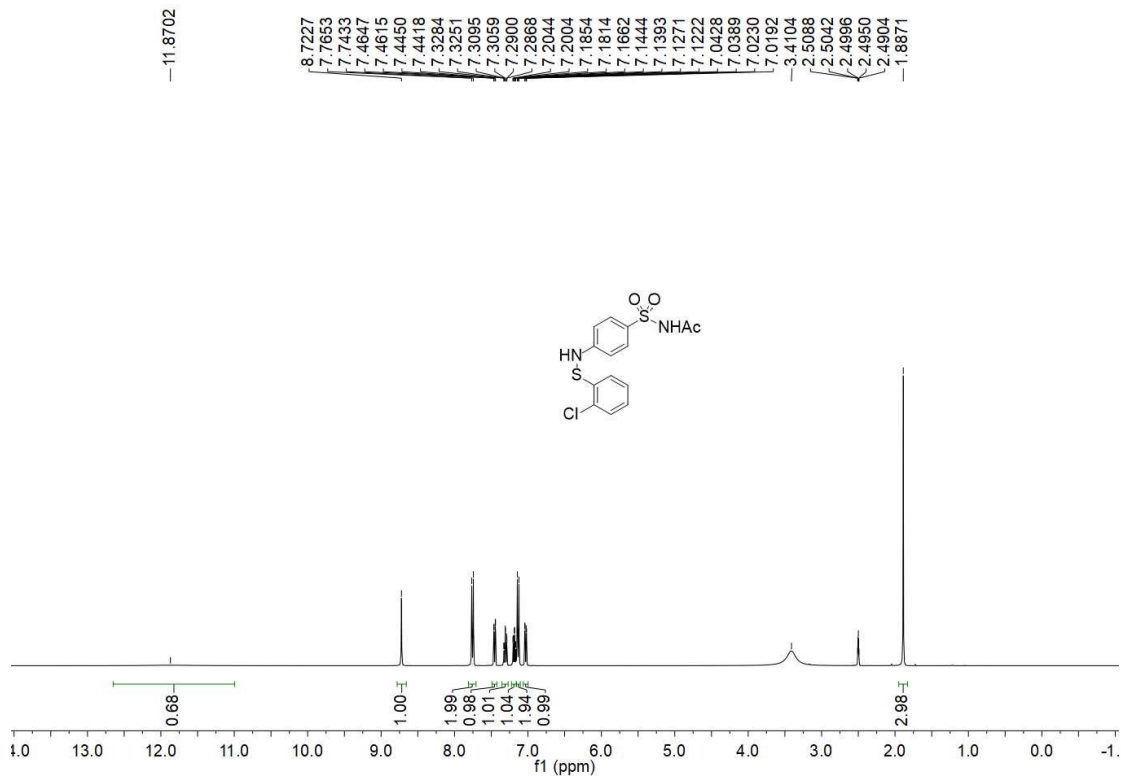

$^1\text{H}$  NMR (400 MHz,  $\text{DMSO-}d_6$ ) spectrum of Compound **4k**

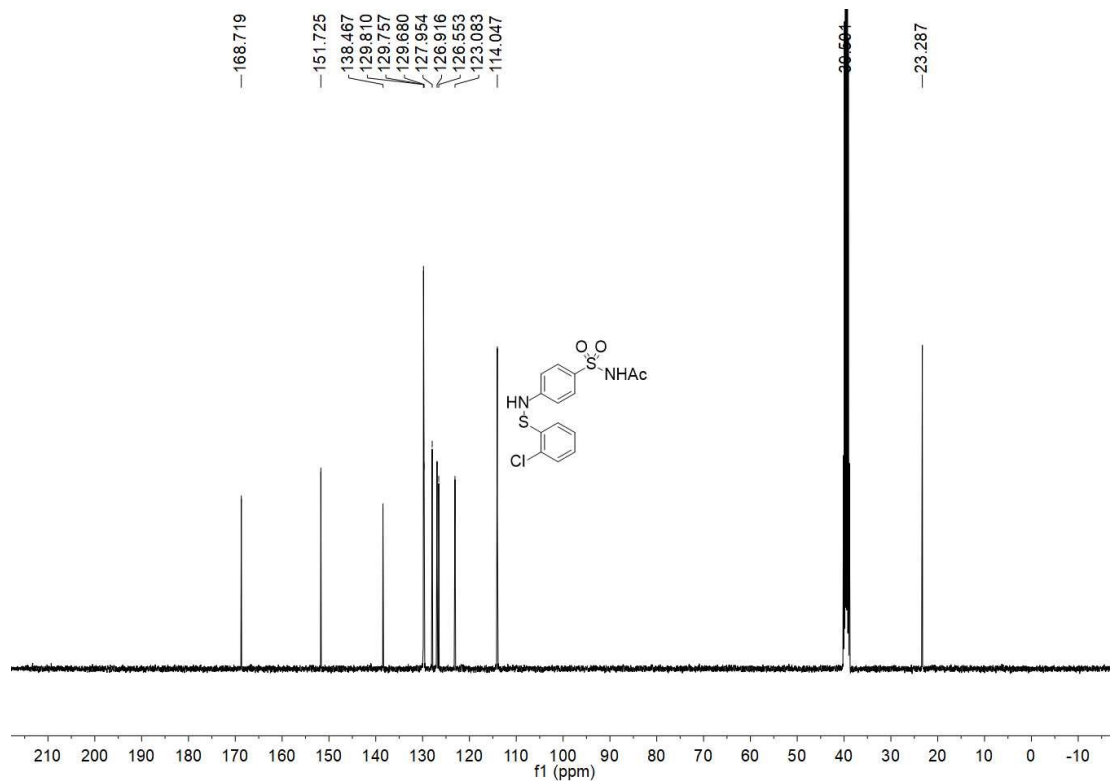

$^{13}\text{C}$  NMR (101 MHz,  $\text{DMSO-}d_6$ ) spectrum of Compound **4k**

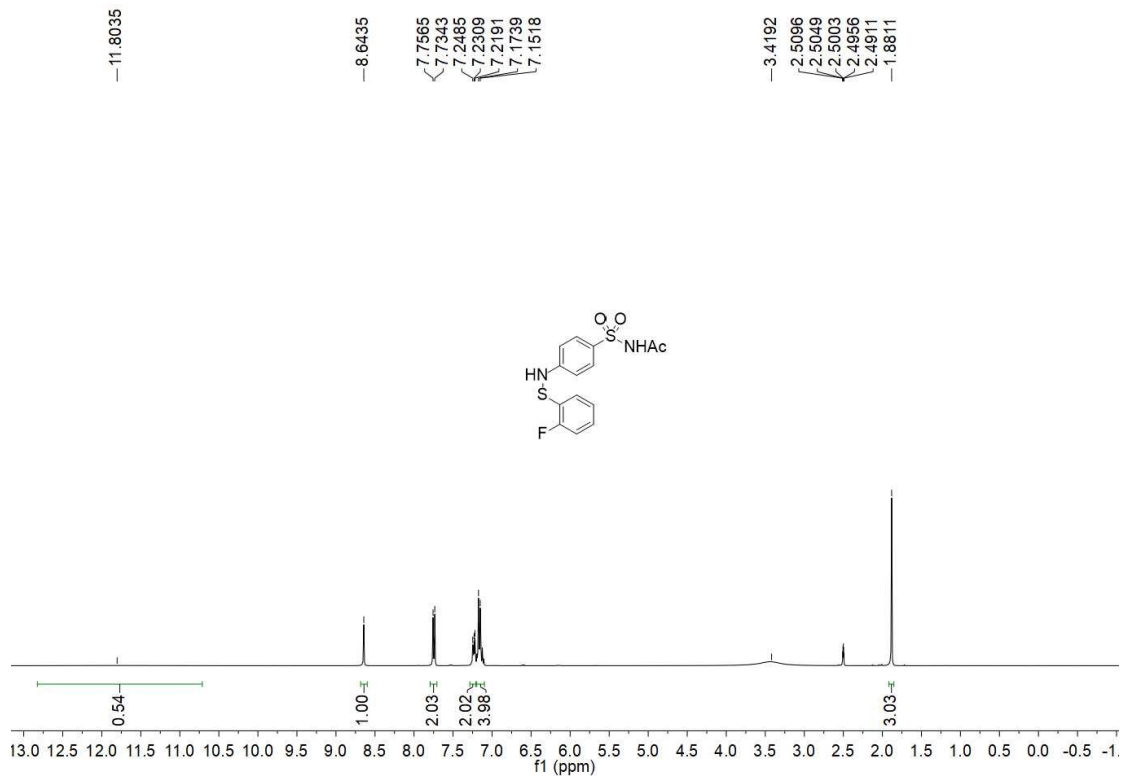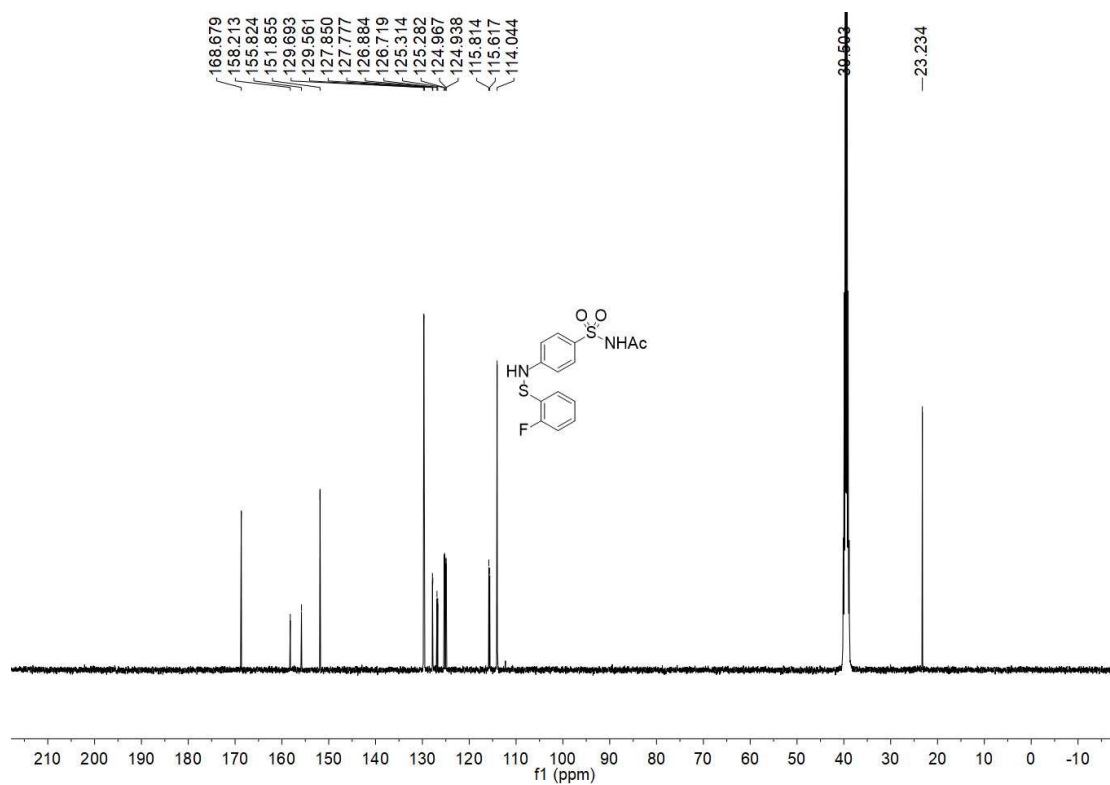

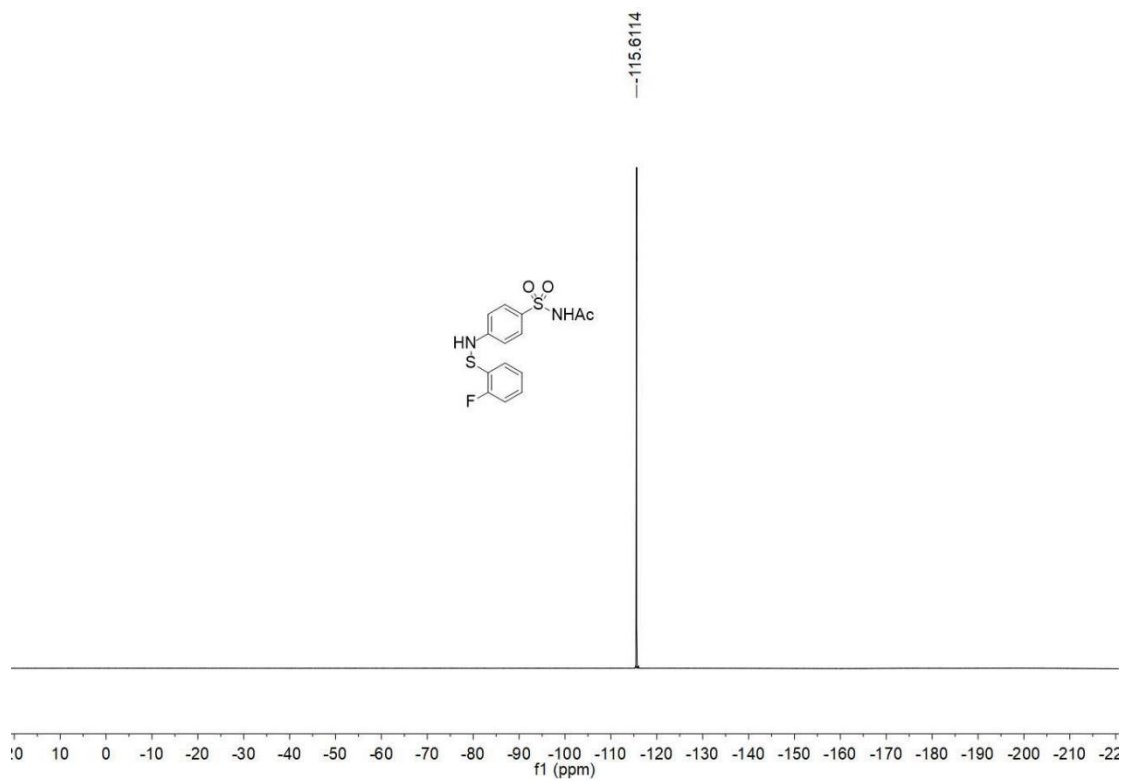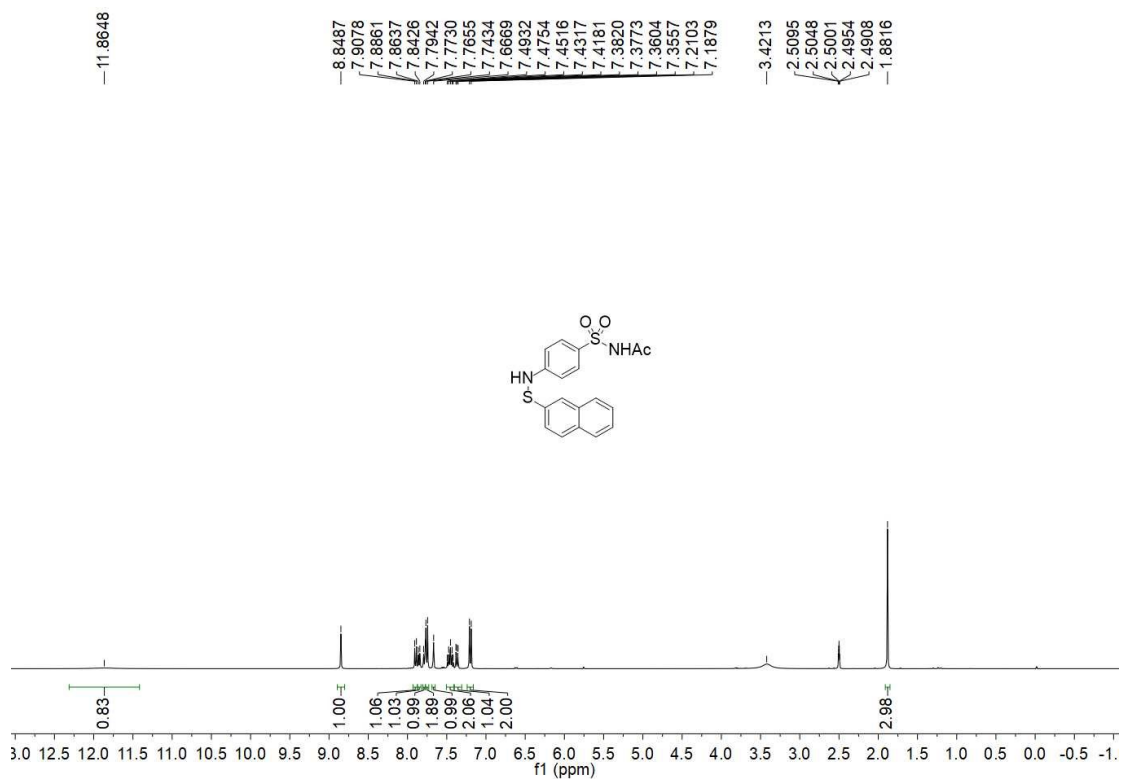

$^1\text{H}$  NMR (400 MHz,  $\text{DMSO-}d_6$ ) spectrum of Compound 4m

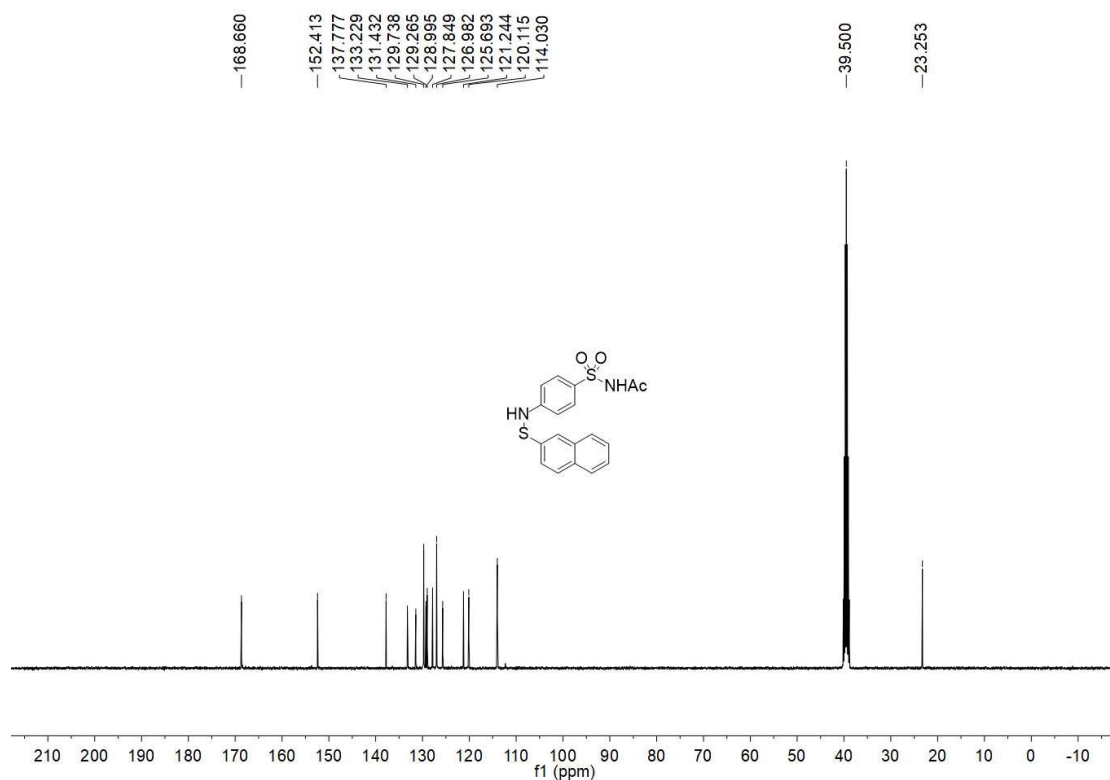

<sup>13</sup>C NMR (101 MHz, DMSO-*d*<sub>6</sub>) spectrum of Compound 4m

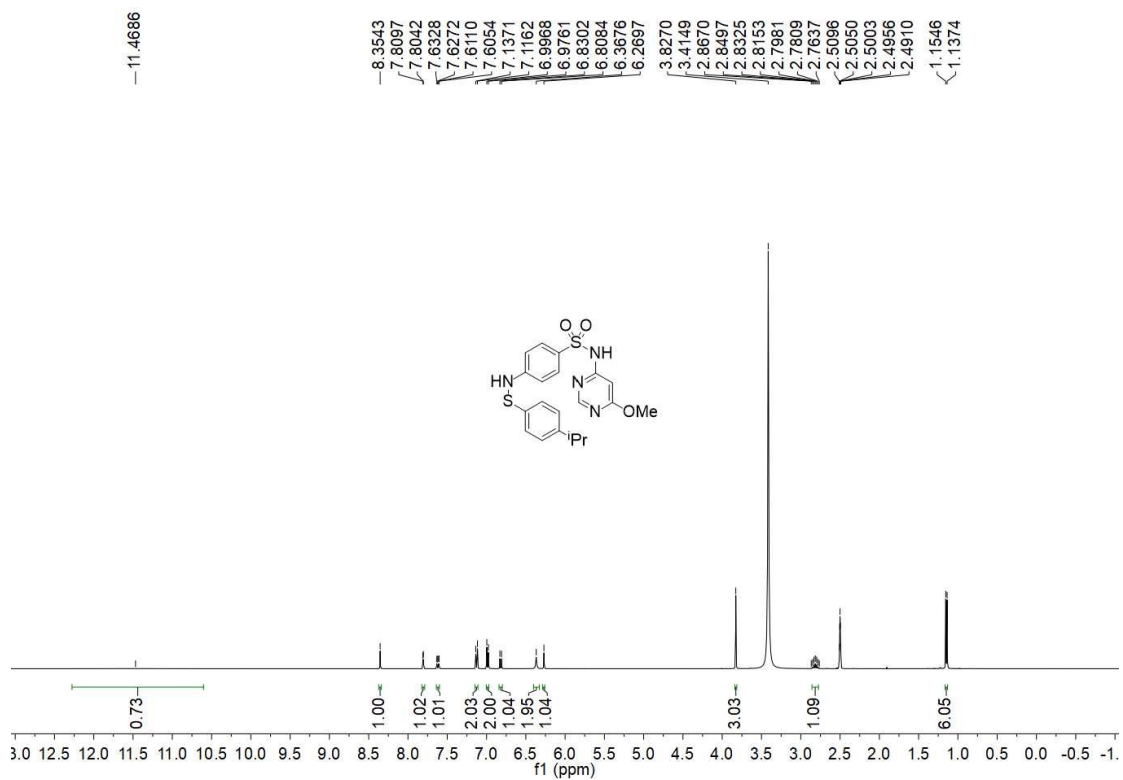

<sup>1</sup>H NMR (400 MHz, DMSO-*d*<sub>6</sub>) spectrum of Compound 5a



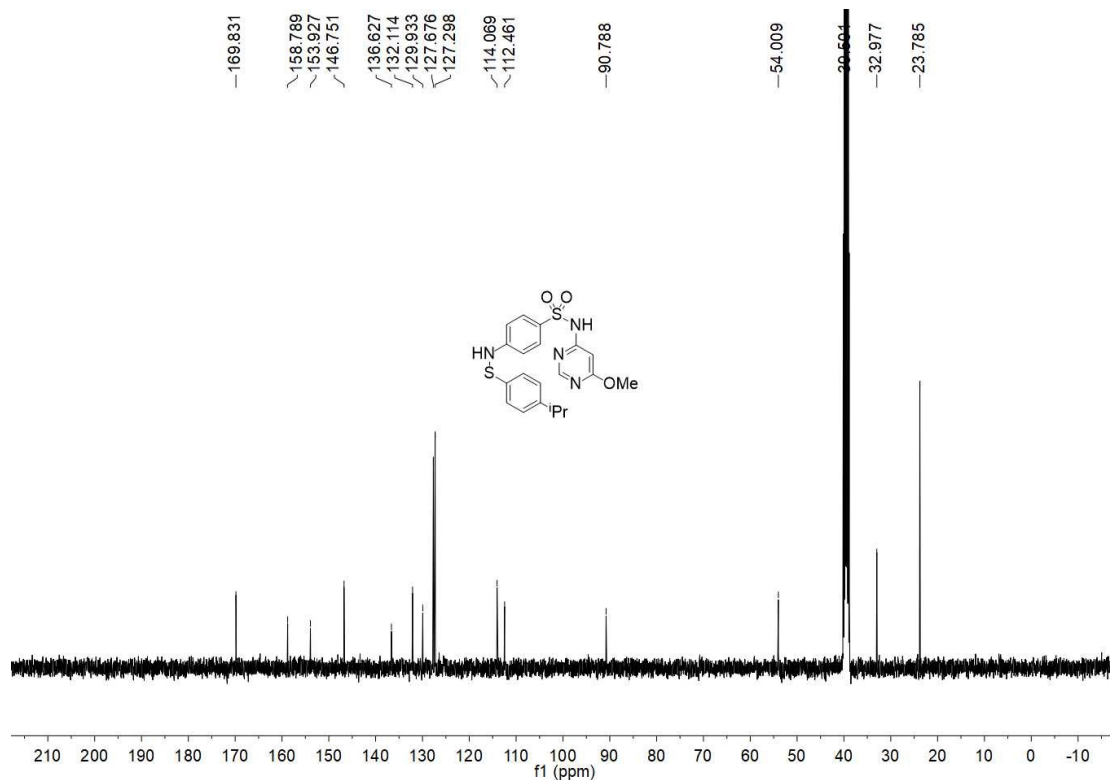

<sup>13</sup>C NMR (101 MHz, DMSO-*d*<sub>6</sub>) spectrum of Compound 5a

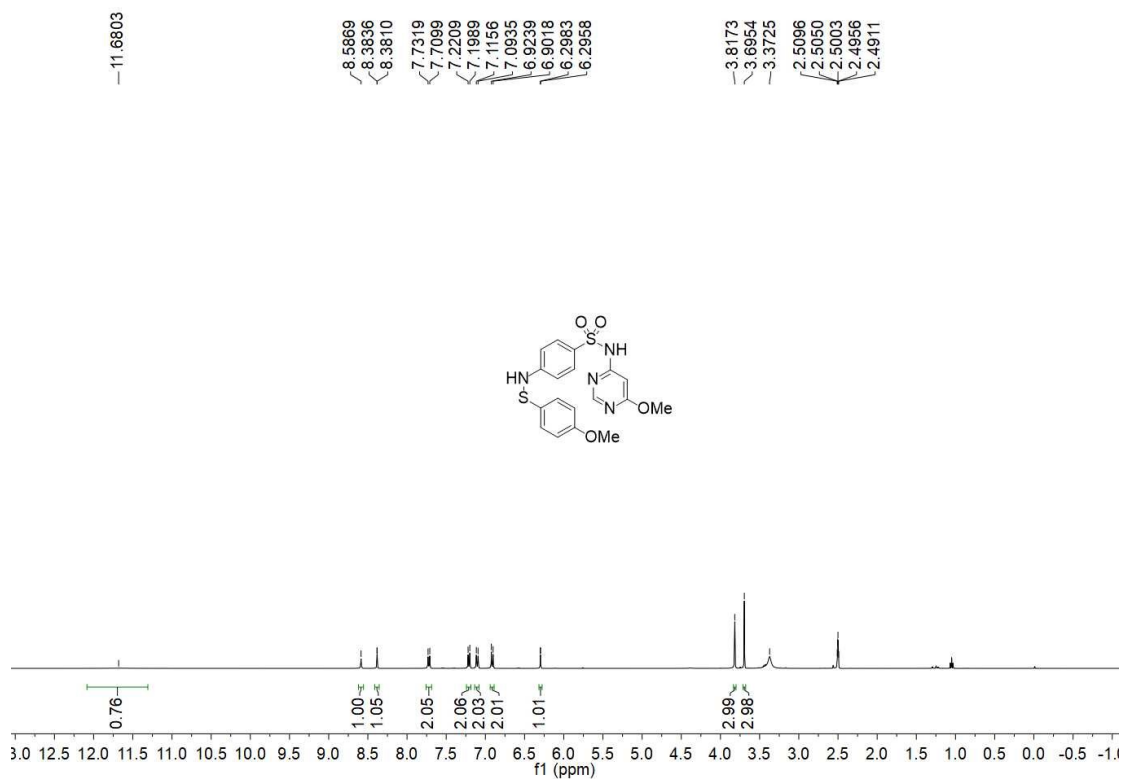

<sup>1</sup>H NMR (400 MHz, DMSO-*d*<sub>6</sub>) spectrum of Compound 5b

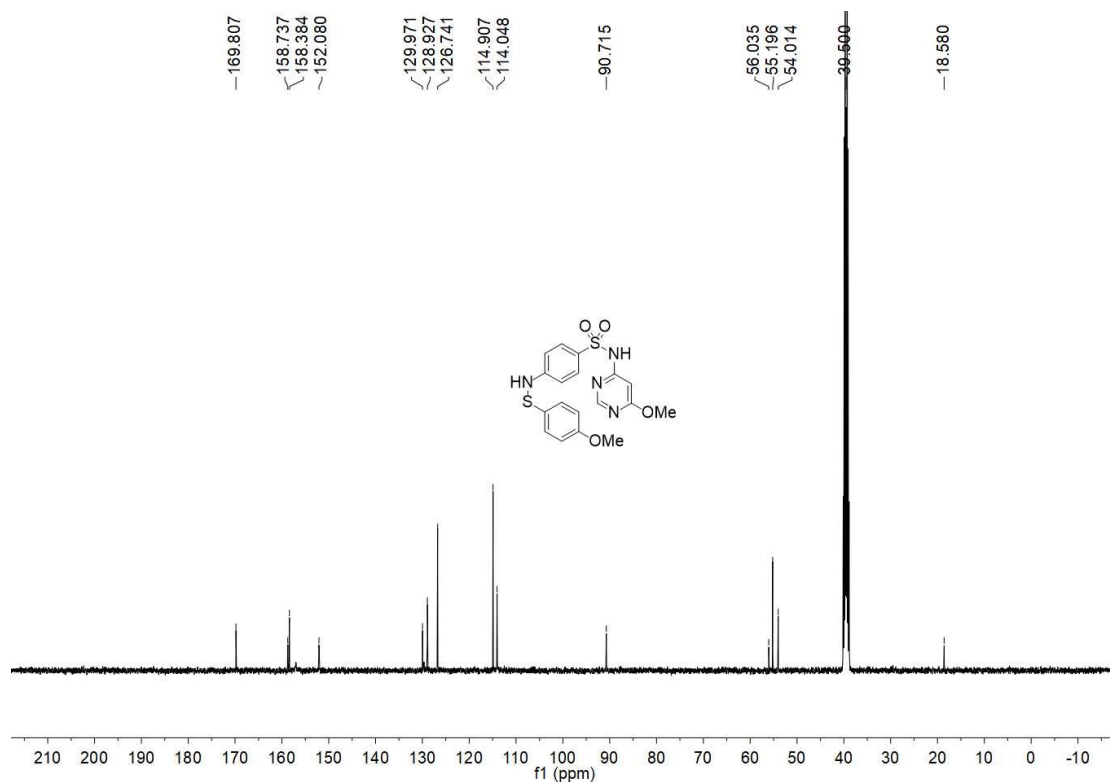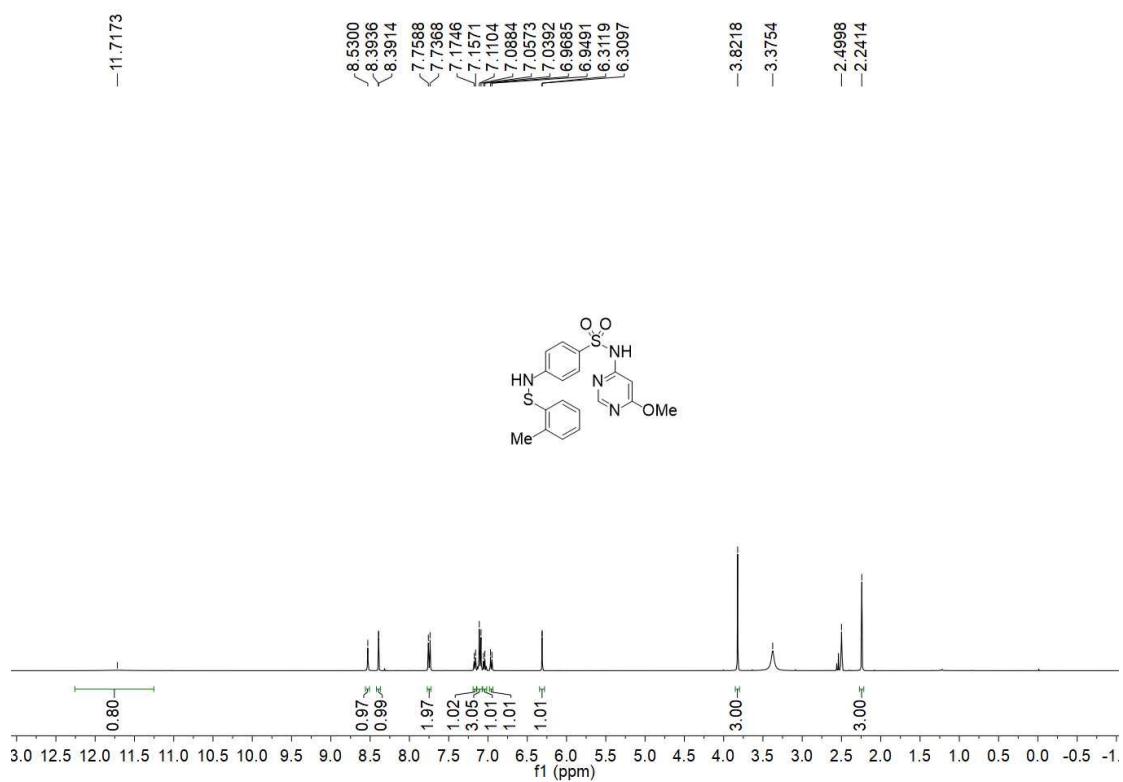

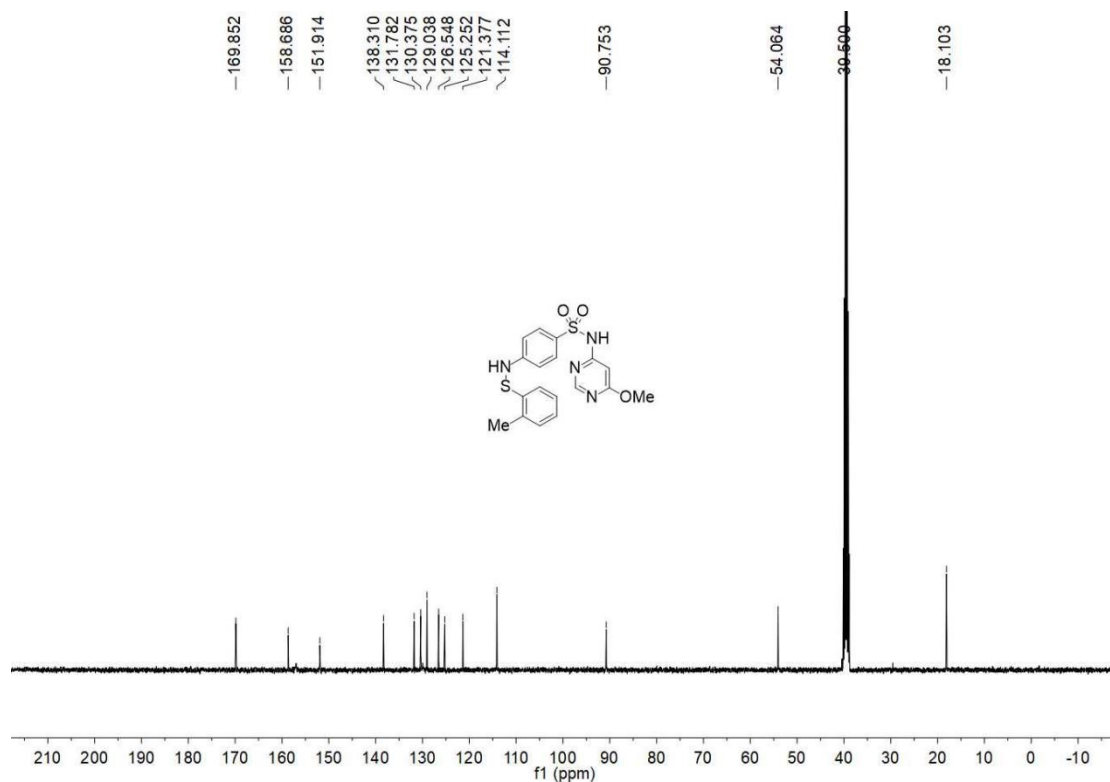

<sup>13</sup>C NMR (101 MHz, DMSO-*d*<sub>6</sub>) spectrum of Compound 5c

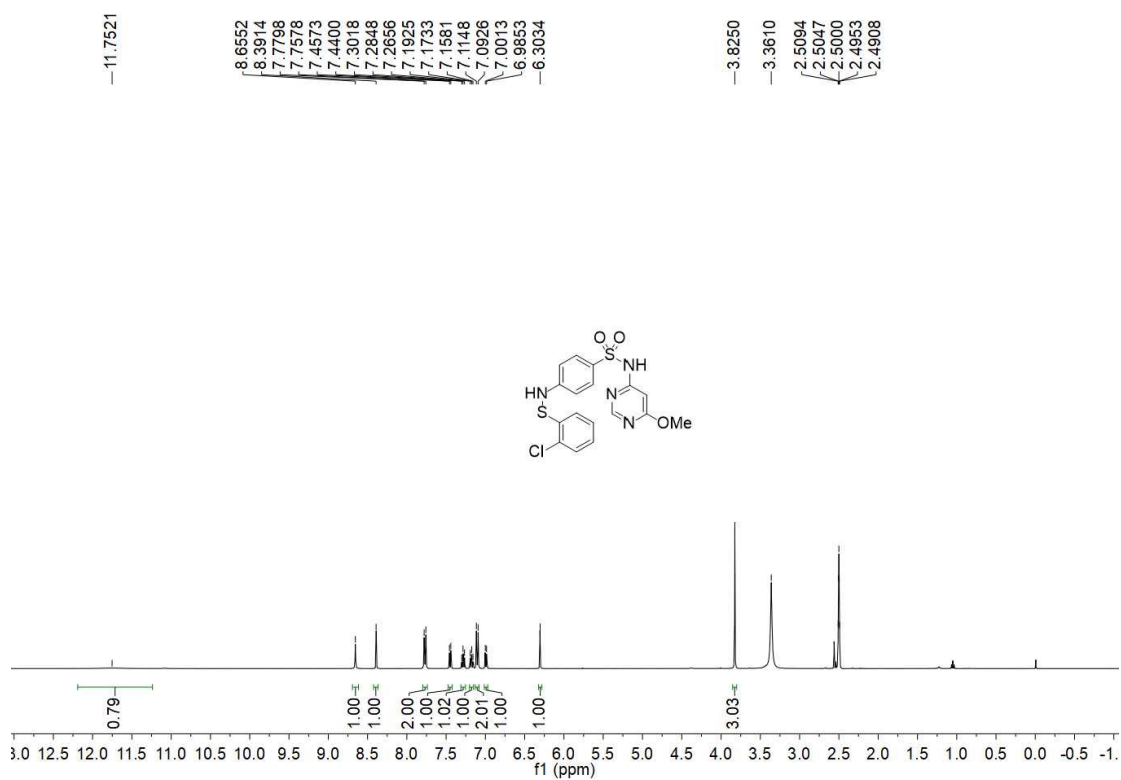

<sup>1</sup>H NMR (400 MHz, DMSO-*d*<sub>6</sub>) spectrum of Compound 5d

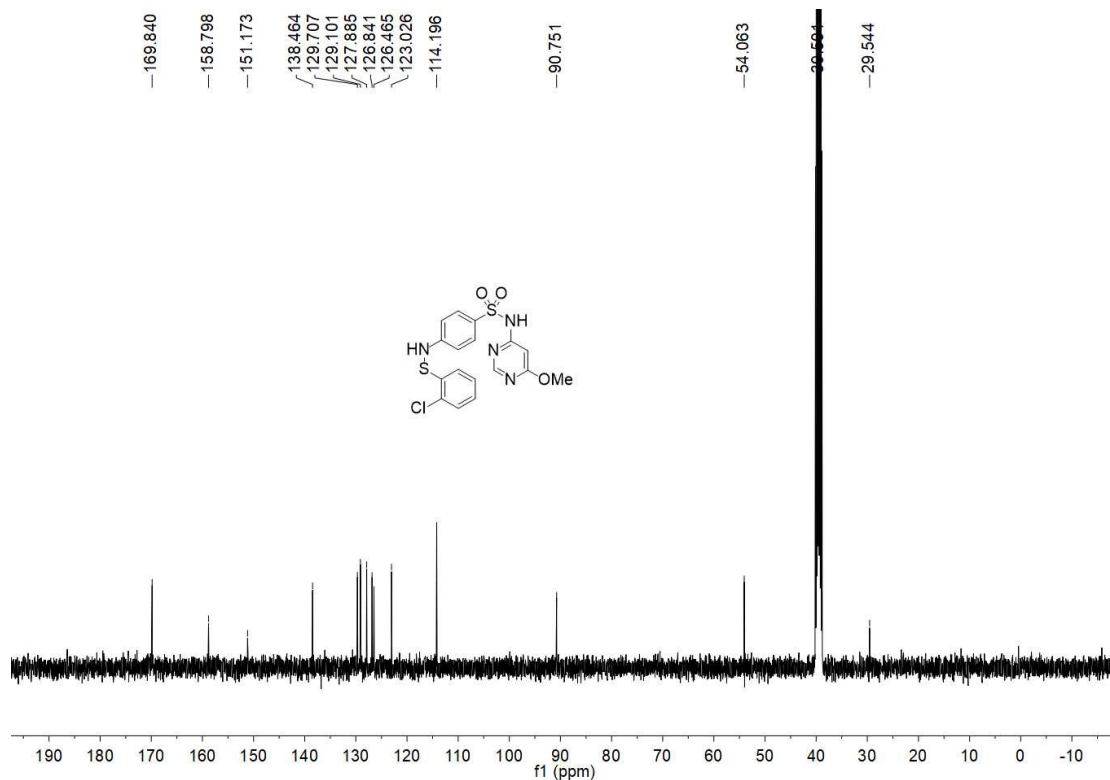

$^{13}\text{C}$  NMR (101 MHz,  $\text{DMSO-}d_6$ ) spectrum of Compound **5d**

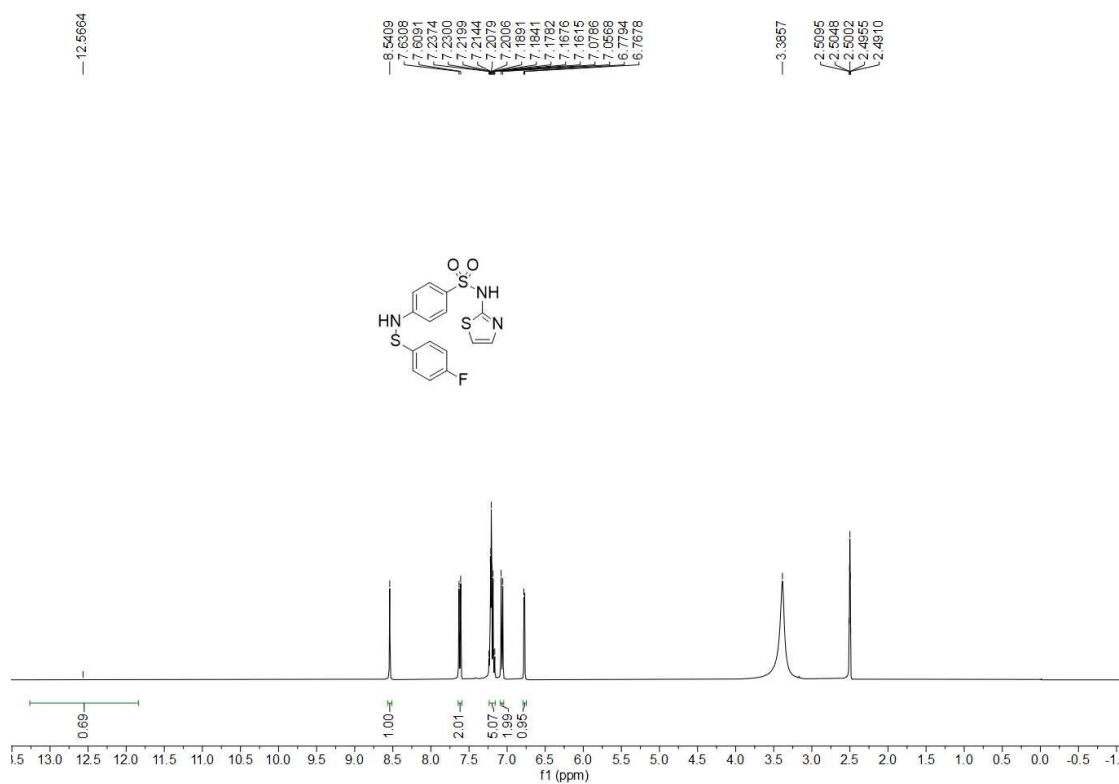

$^1\text{H}$  NMR (400 MHz,  $\text{DMSO-}d_6$ ) spectrum of Compound **5e**

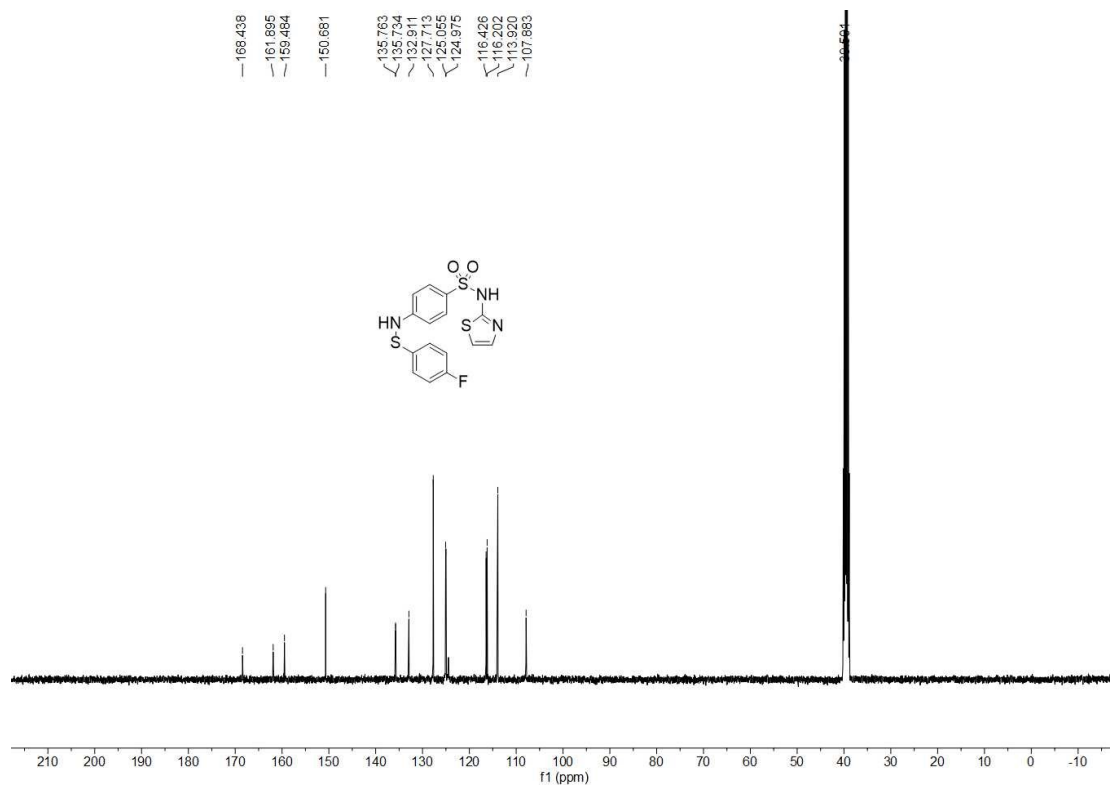

$^{13}\text{C}$  NMR (101 MHz,  $\text{DMSO-}d_6$ ) spectrum of Compound 5e

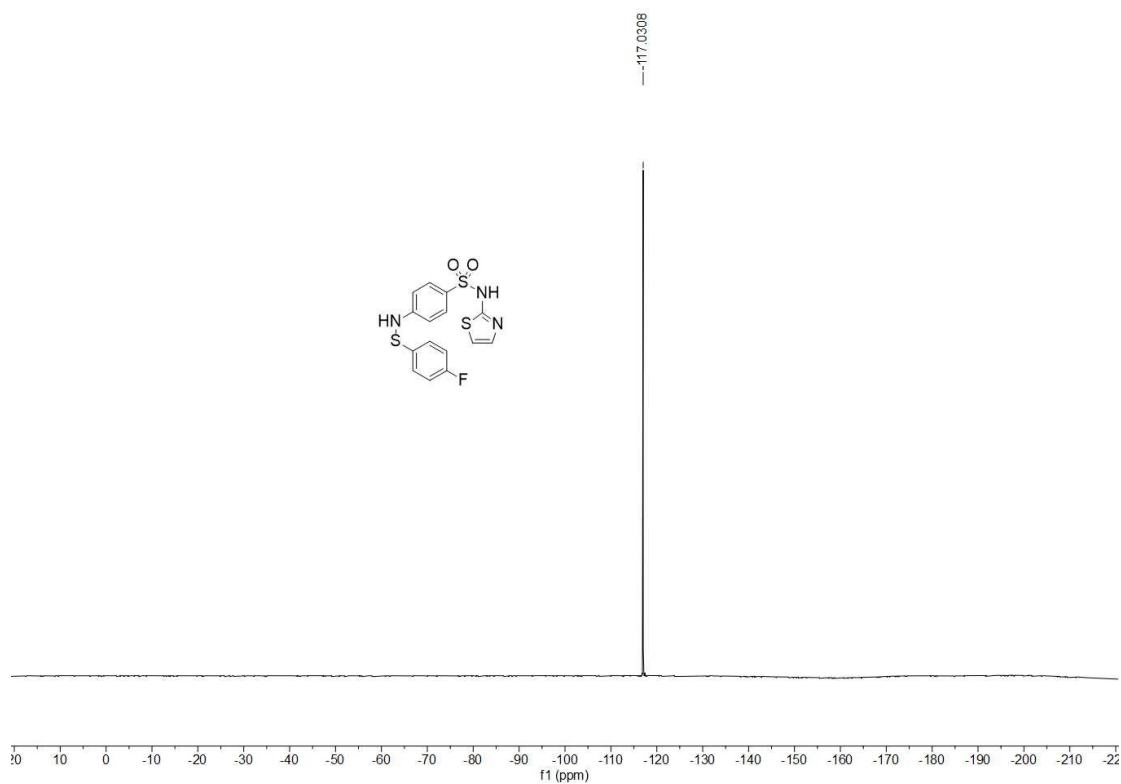

$^{19}\text{F}$  NMR (376 MHz,  $\text{DMSO-}d_6$ ) spectrum of Compound 5e

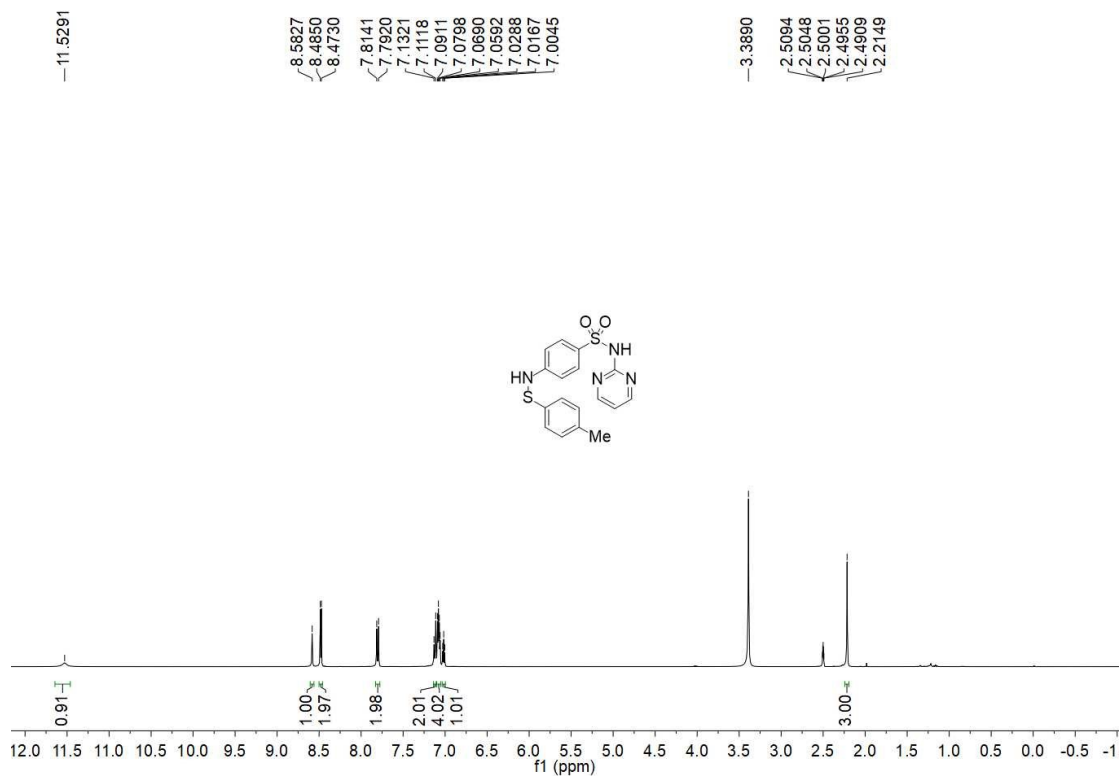

<sup>1</sup>H NMR (400 MHz, DMSO-*d*<sub>6</sub>) spectrum of Compound 5f

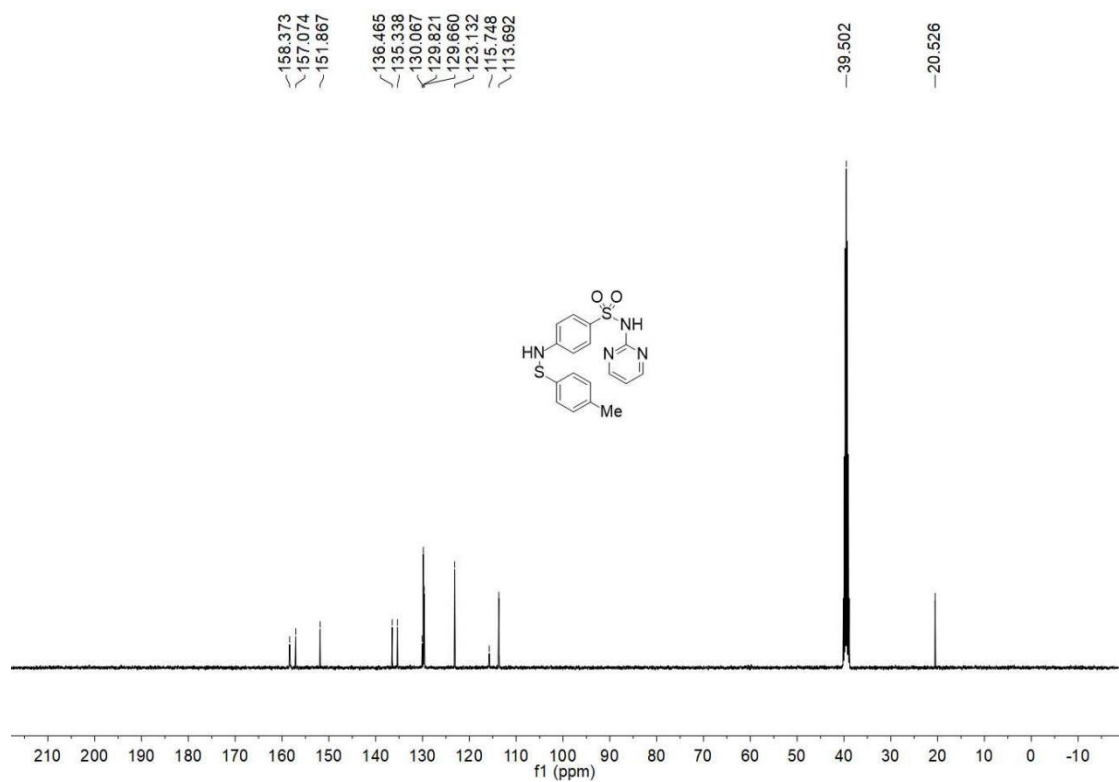

<sup>13</sup>C NMR (101 MHz, DMSO-*d*<sub>6</sub>) spectrum of Compound 5f

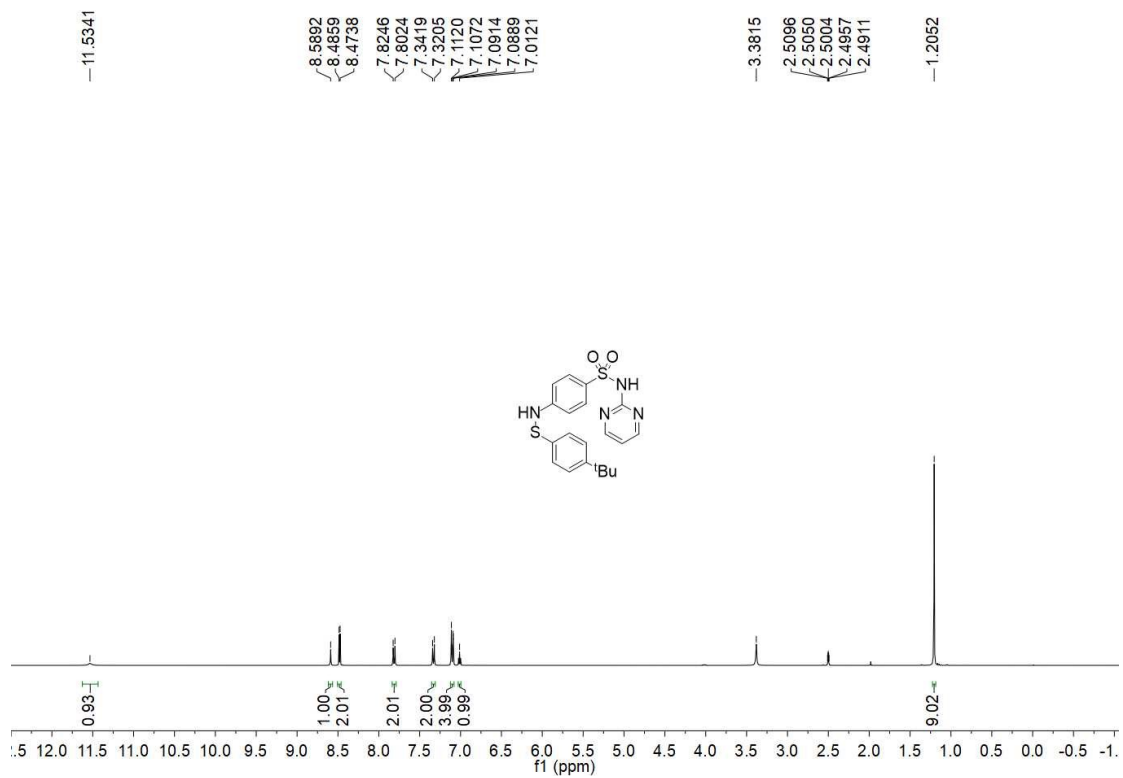

<sup>1</sup>H NMR (400 MHz, DMSO-*d*<sub>6</sub>) spectrum of Compound **5g**

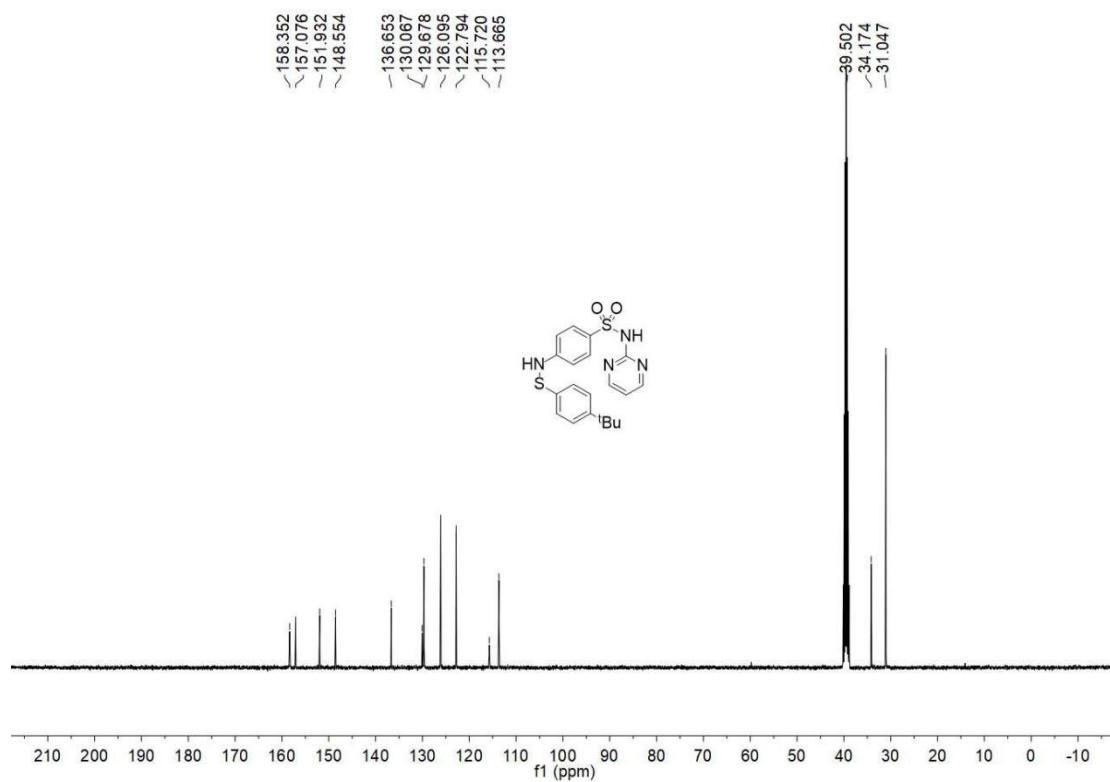

<sup>13</sup>C NMR (101 MHz, DMSO-*d*<sub>6</sub>) spectrum of Compound **5g**

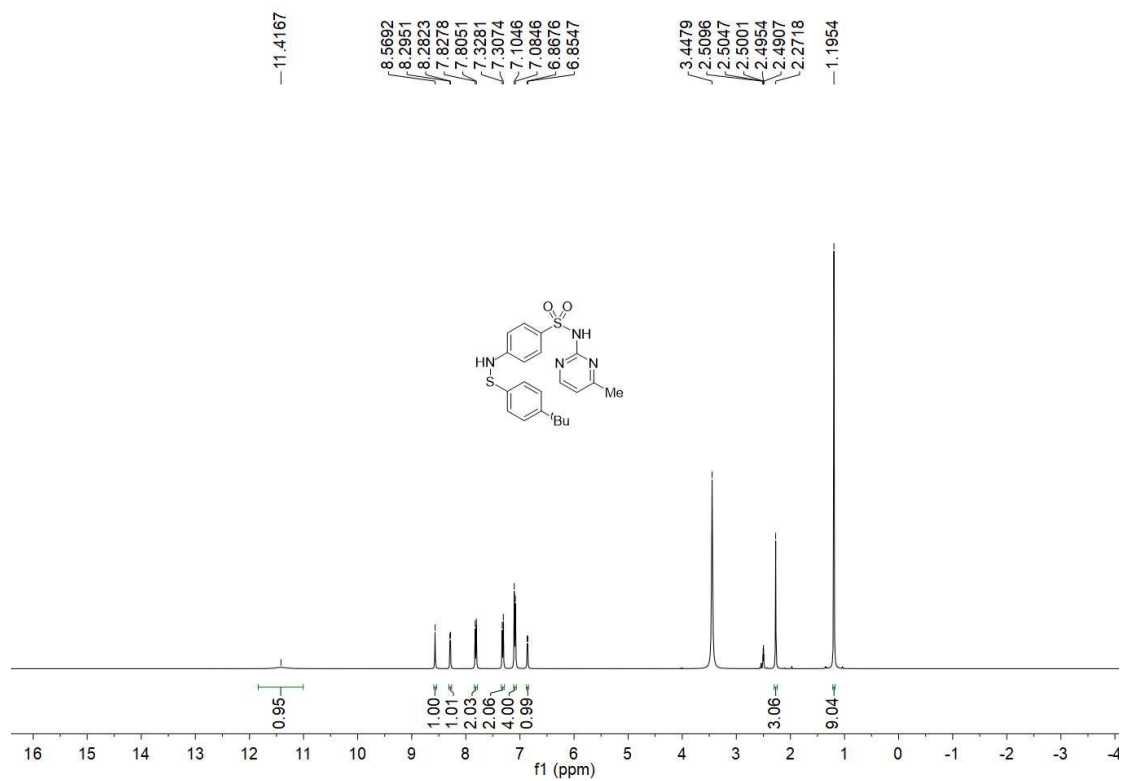

<sup>1</sup>H NMR (400 MHz, DMSO-*d*<sub>6</sub>) spectrum of Compound 5h

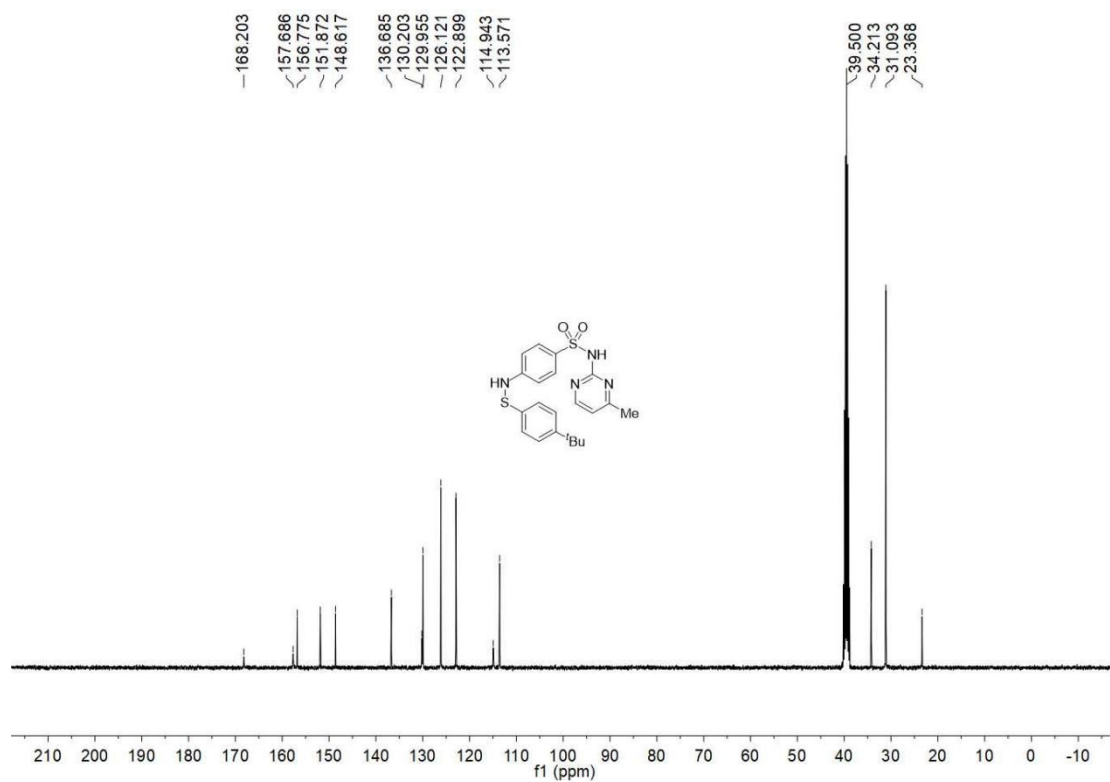

<sup>13</sup>C NMR (101 MHz, DMSO-*d*<sub>6</sub>) spectrum of Compound 5h



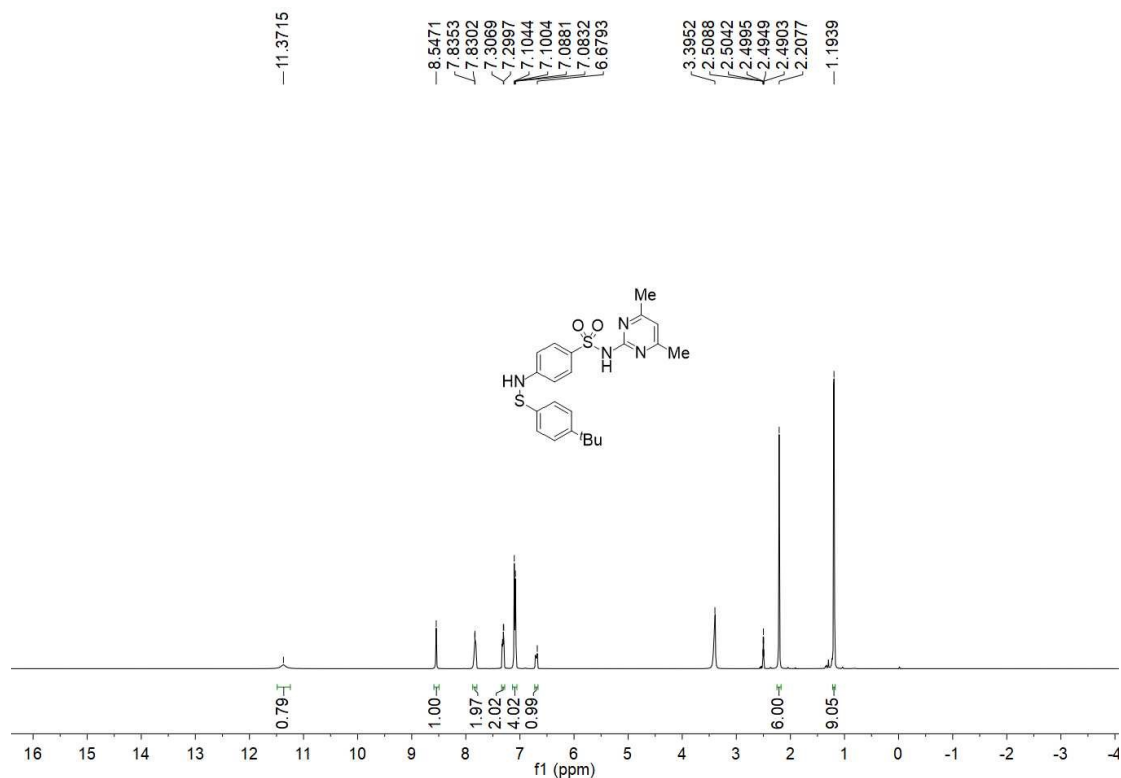

<sup>1</sup>H NMR (400 MHz, DMSO-*d*<sub>6</sub>) spectrum of Compound **5i**

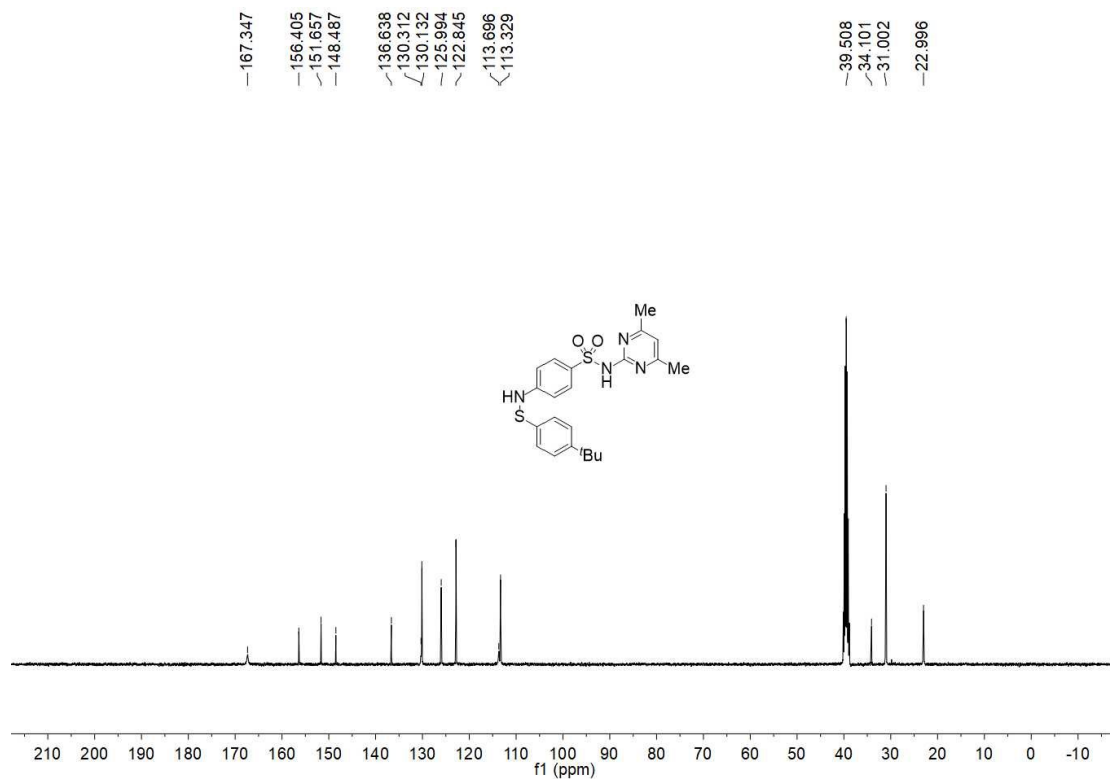

<sup>13</sup>C NMR (101 MHz, DMSO-*d*<sub>6</sub>) spectrum of Compound **5i**

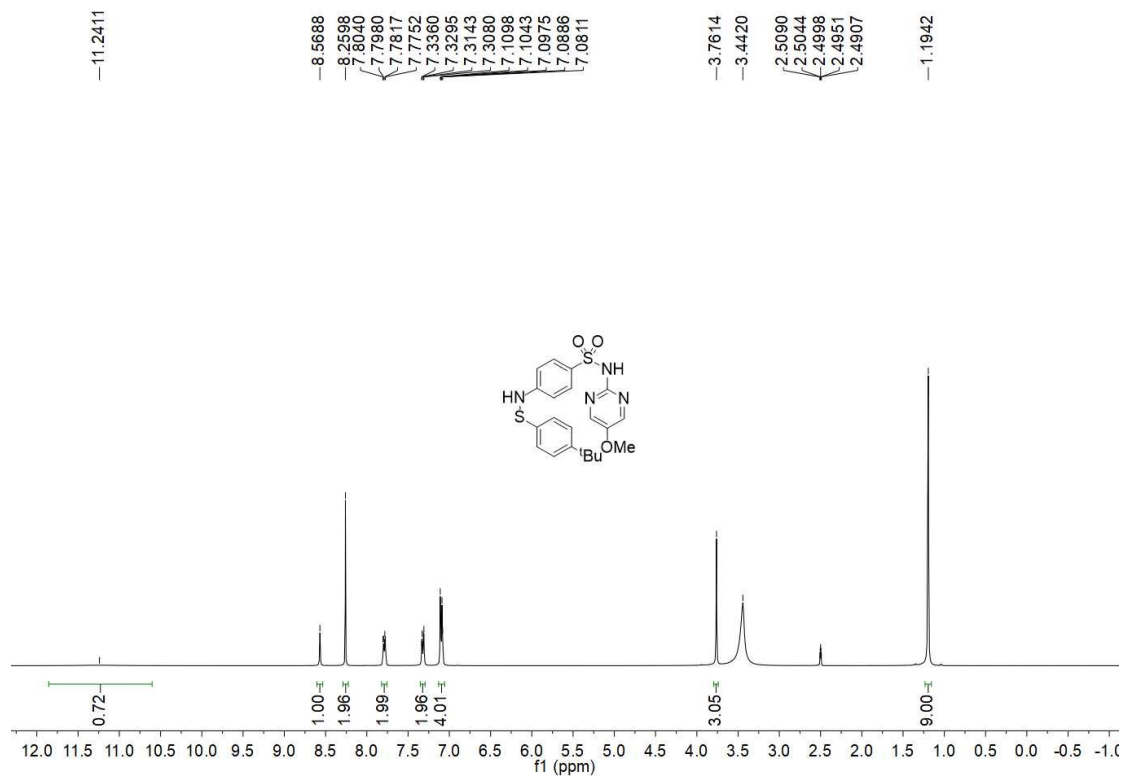

<sup>1</sup>H NMR (400 MHz, DMSO-*d*<sub>6</sub>) spectrum of Compound **5j**

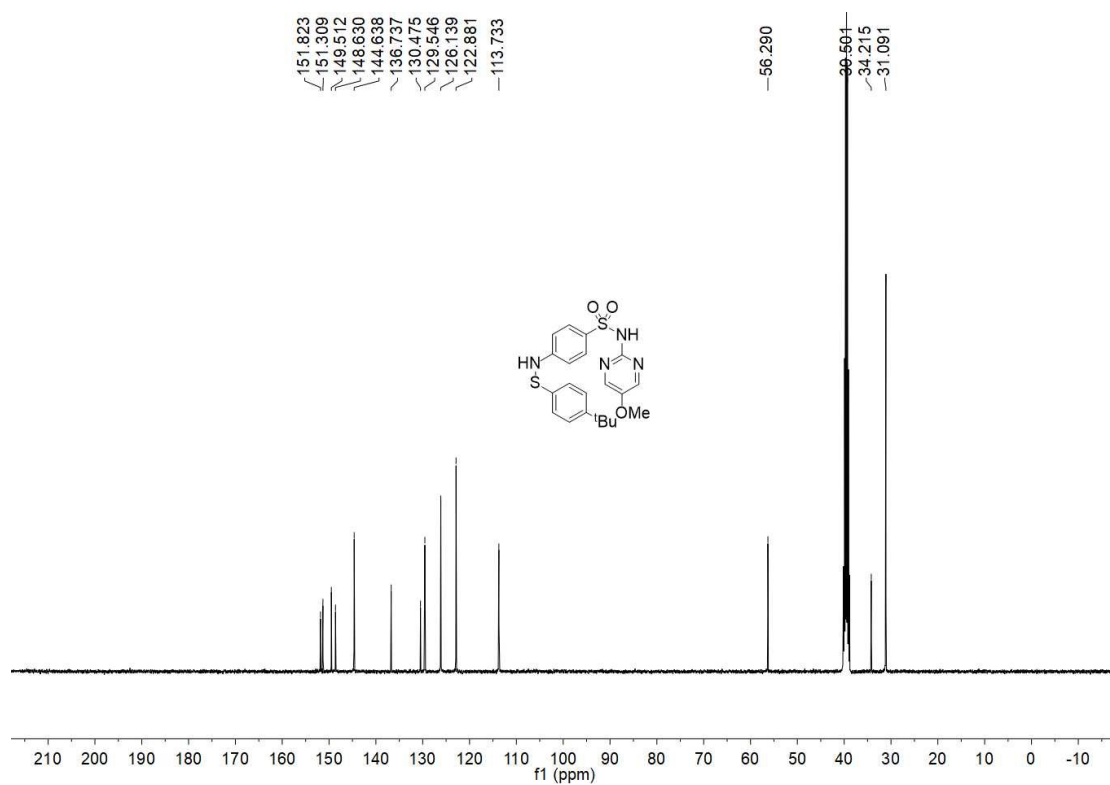

<sup>13</sup>C NMR (101 MHz, DMSO-*d*<sub>6</sub>) spectrum of Compound **5j**

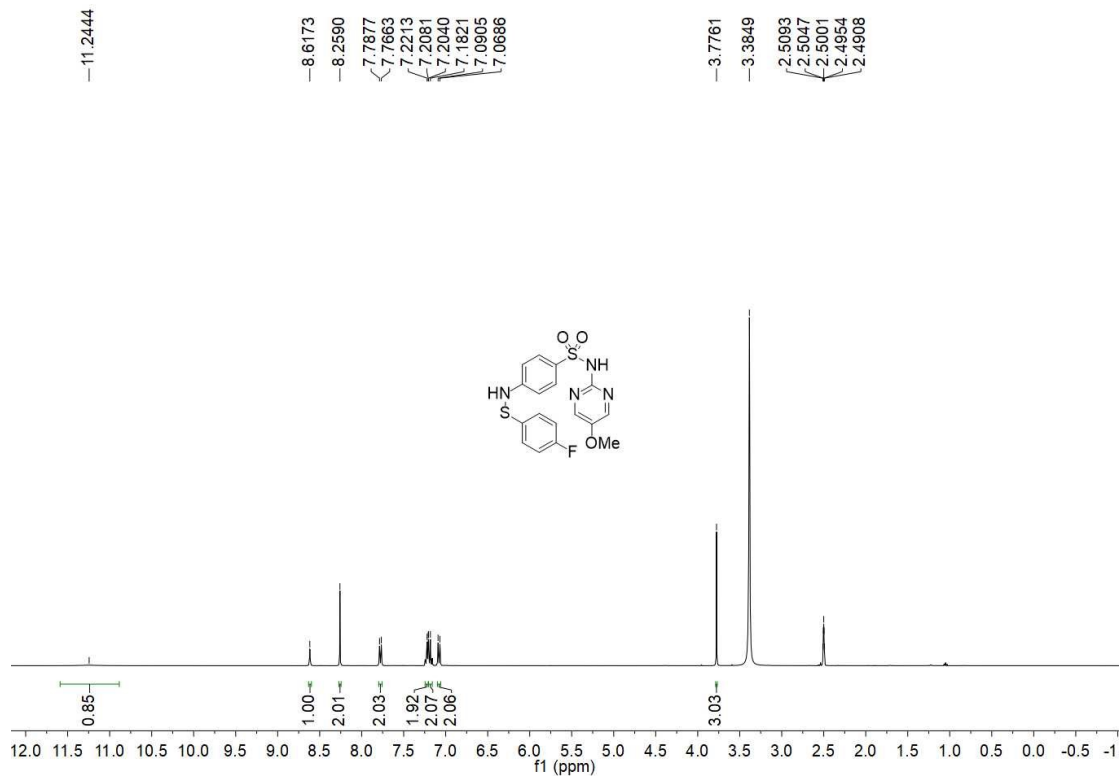

<sup>1</sup>H NMR (400 MHz, DMSO-*d*<sub>6</sub>) spectrum of Compound 5k

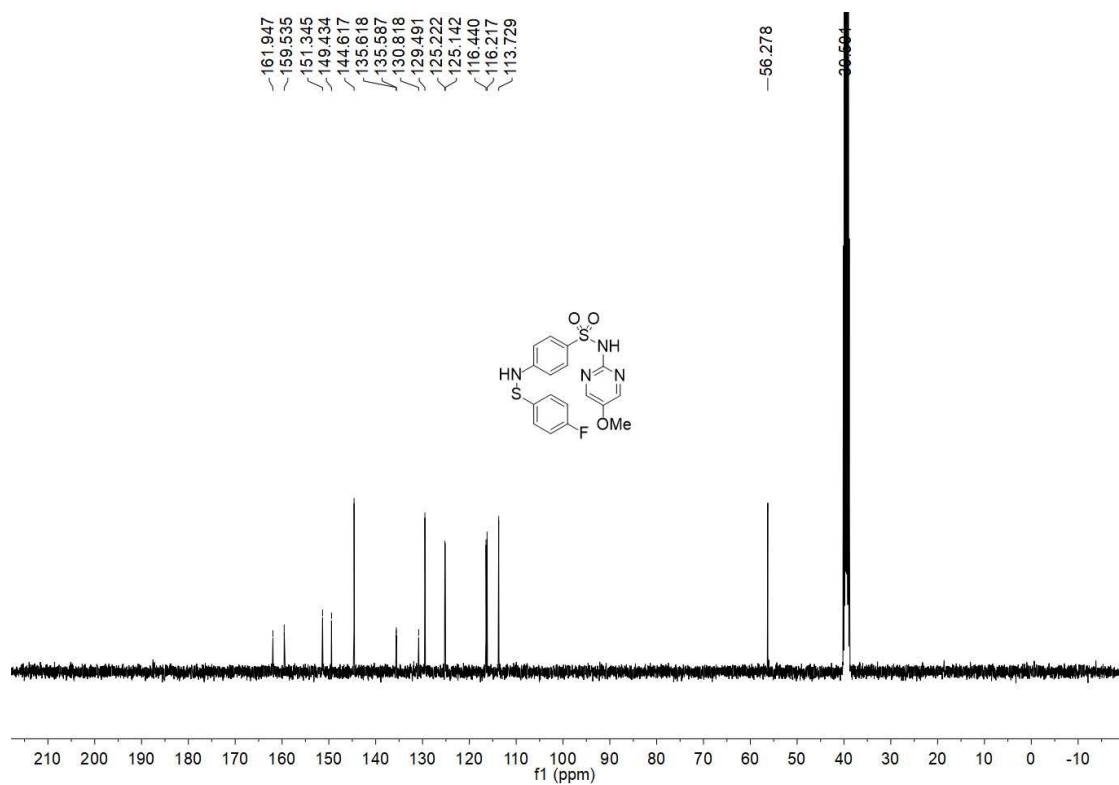

<sup>13</sup>C NMR (101 MHz, DMSO-*d*<sub>6</sub>) spectrum of Compound 5k

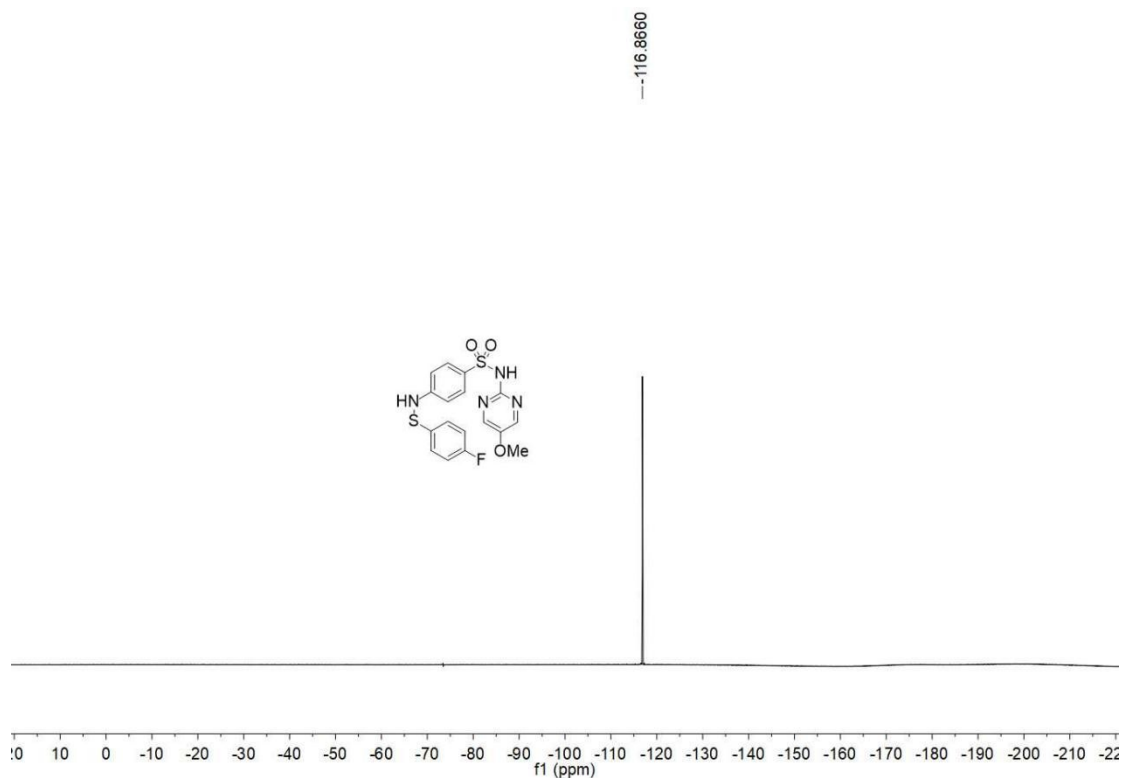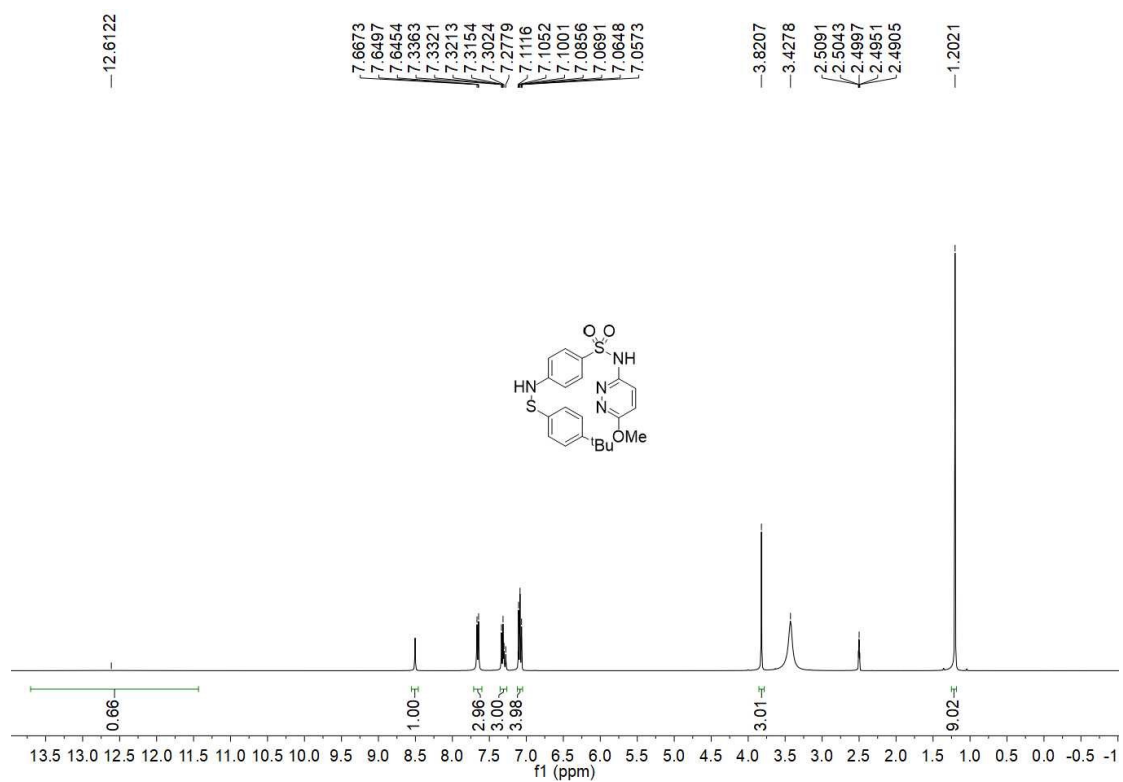

$^1\text{H}$  NMR (400 MHz,  $\text{DMSO-}d_6$ ) spectrum of Compound 5l

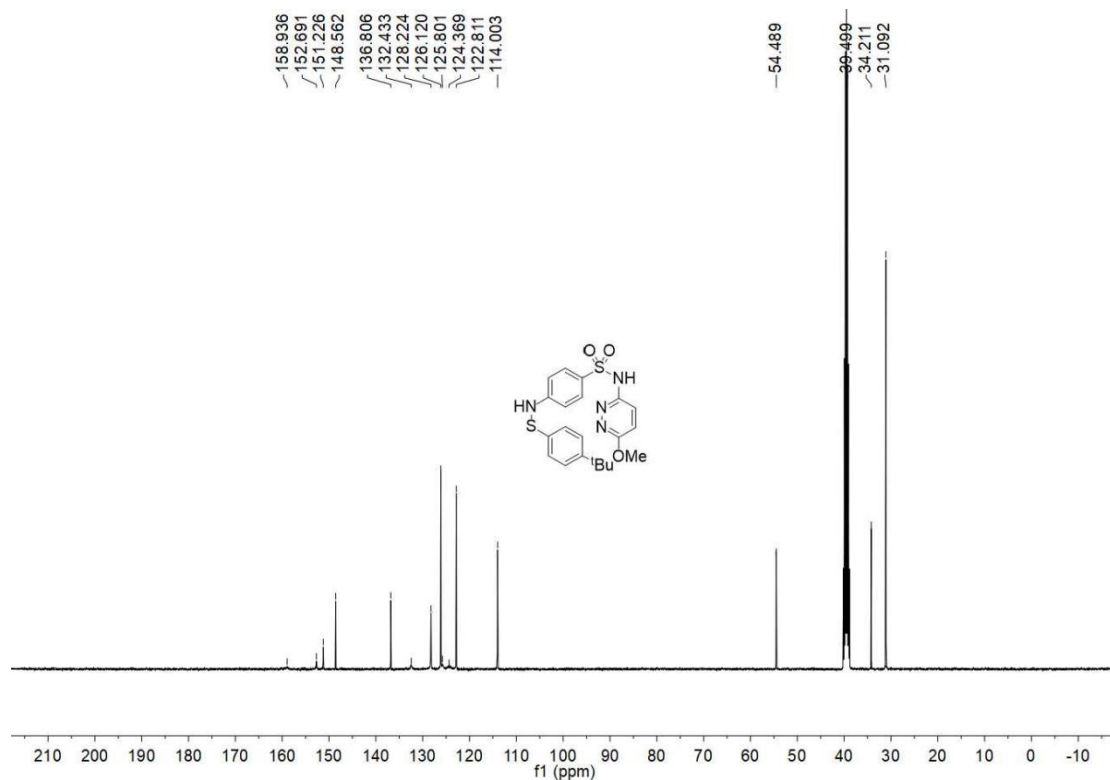

<sup>13</sup>C NMR (101 MHz, DMSO-*d*<sub>6</sub>) spectrum of Compound 5l

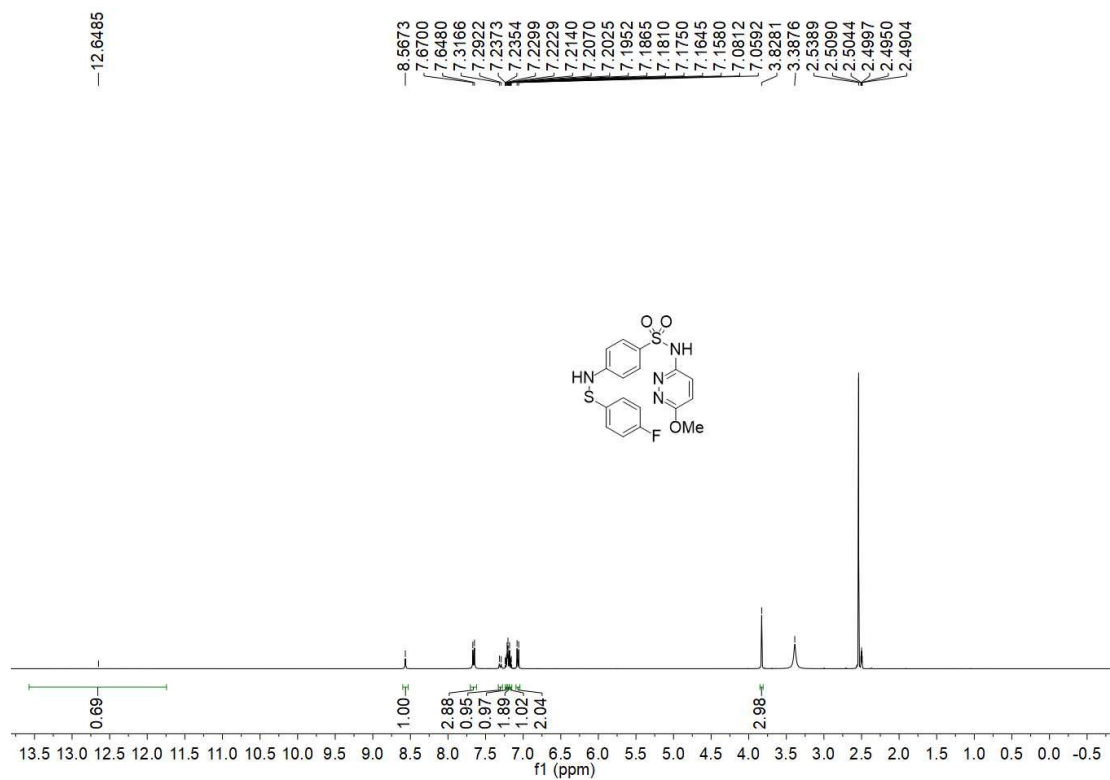

<sup>1</sup>H NMR (400 MHz, DMSO-*d*<sub>6</sub>) spectrum of Compound 5m

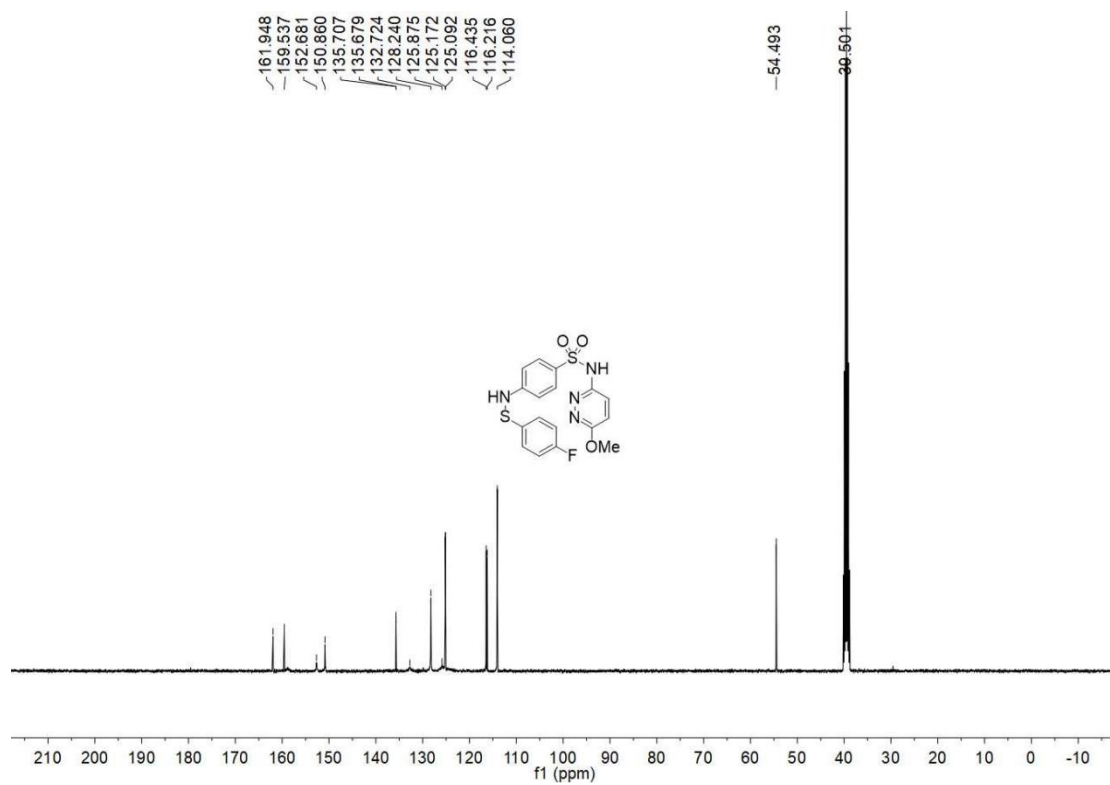

$^{13}\text{C}$  NMR (101 MHz,  $\text{DMSO-}d_6$ ) spectrum of Compound **5m**

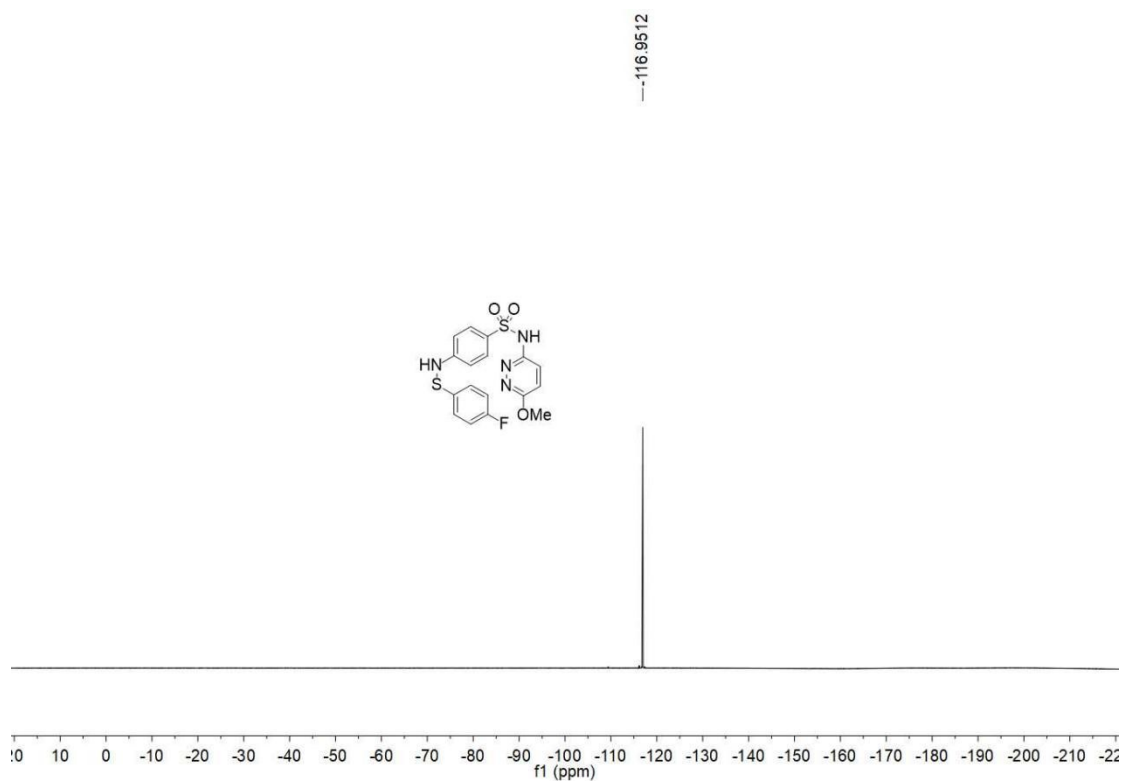

$^{19}\text{F}$  NMR (376 MHz,  $\text{DMSO-}d_6$ ) spectrum of Compound **5m**

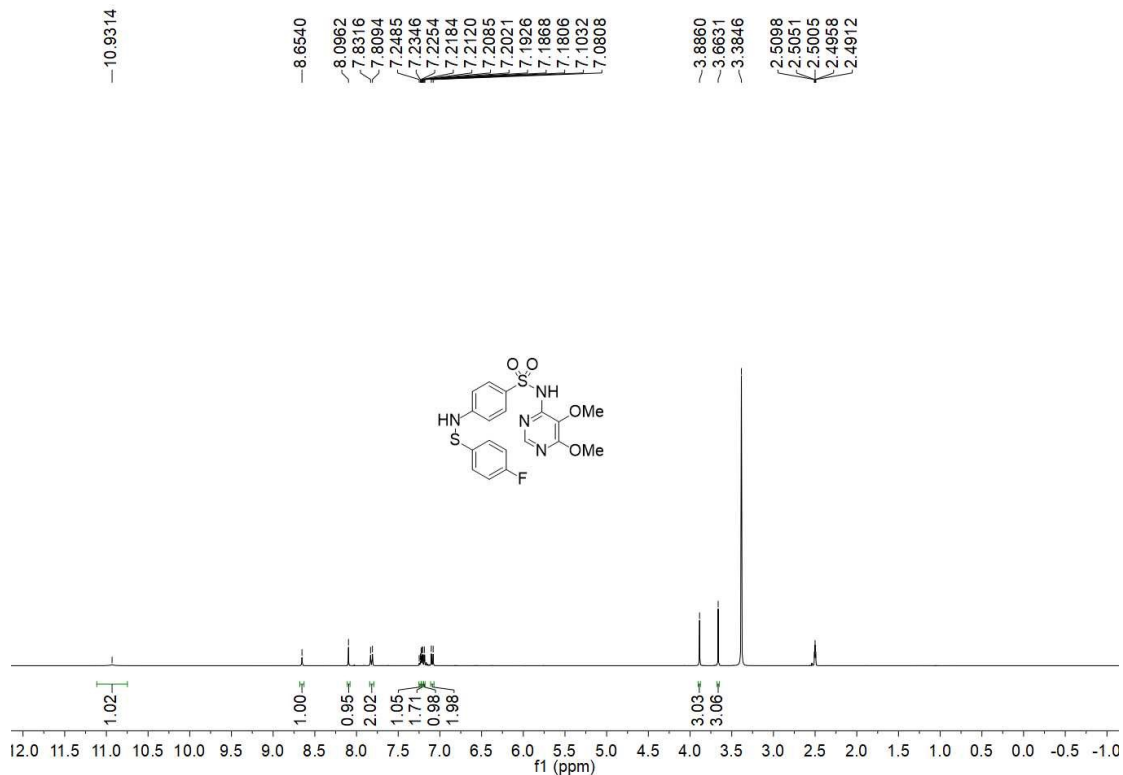

$^1\text{H}$  NMR (400 MHz,  $\text{DMSO-}d_6$ ) spectrum of Compound 5n

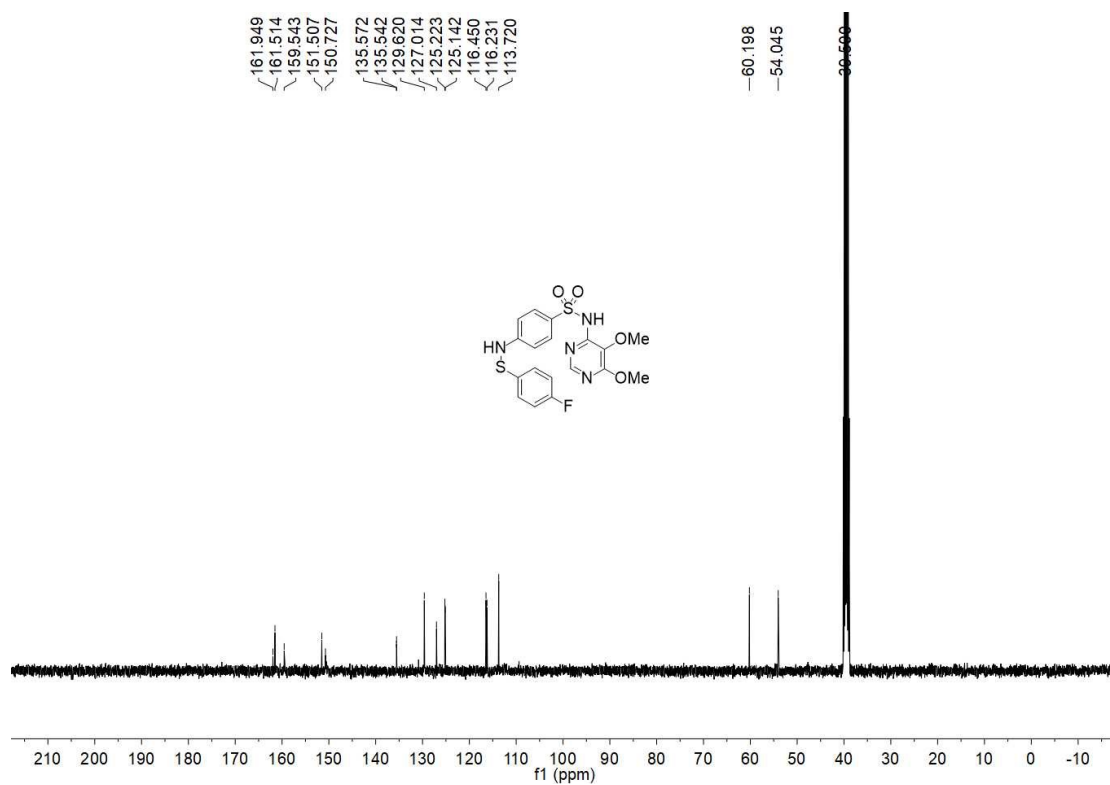

$^{13}\text{C}$  NMR (101 MHz,  $\text{DMSO-}d_6$ ) spectrum of Compound 5n

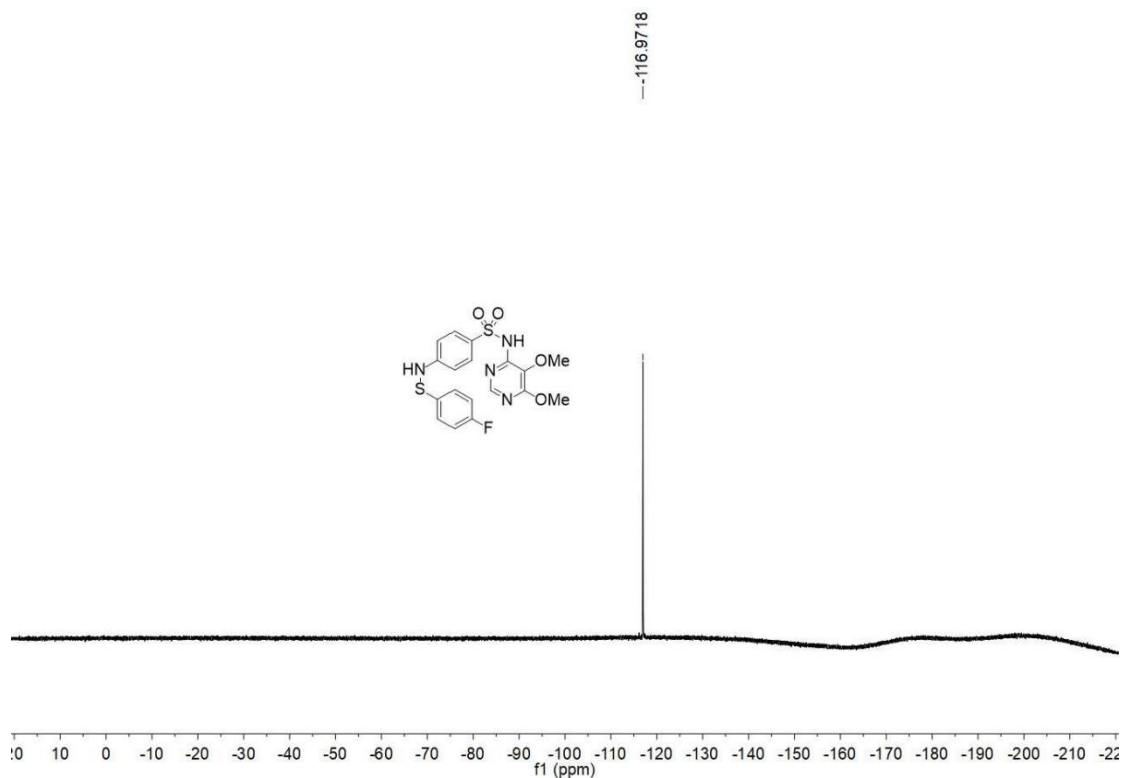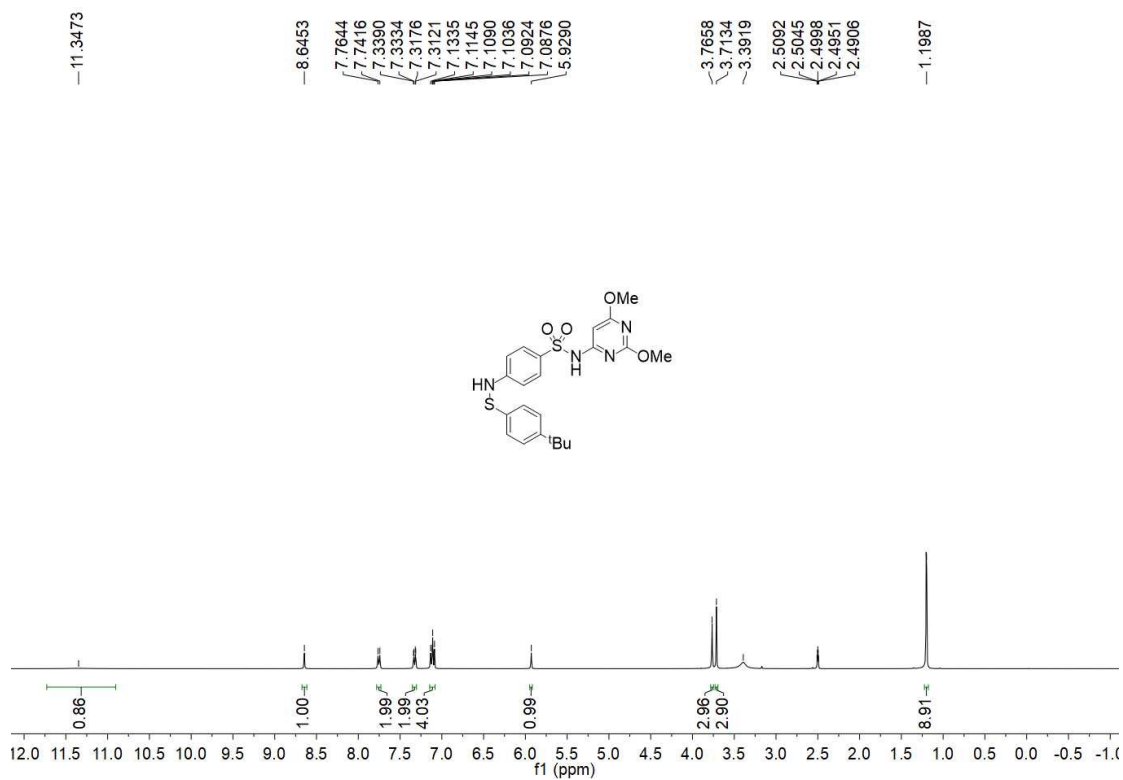



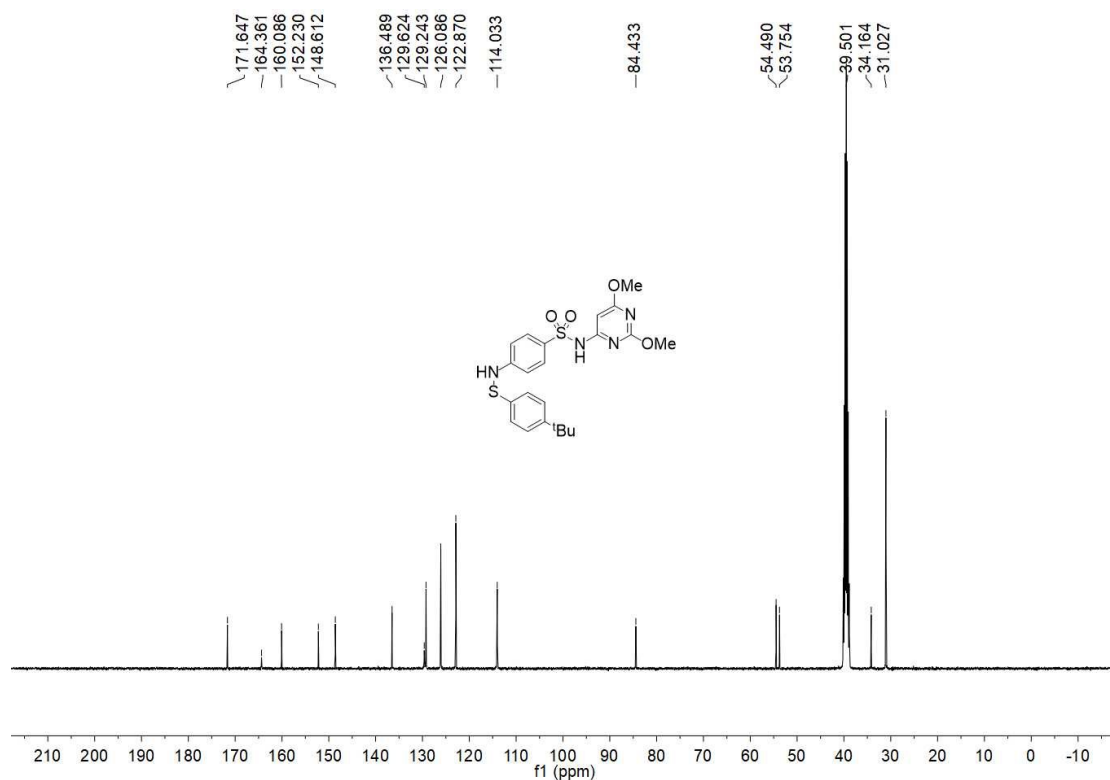

<sup>13</sup>C NMR (101 MHz, DMSO-*d*<sub>6</sub>) spectrum of Compound 5o

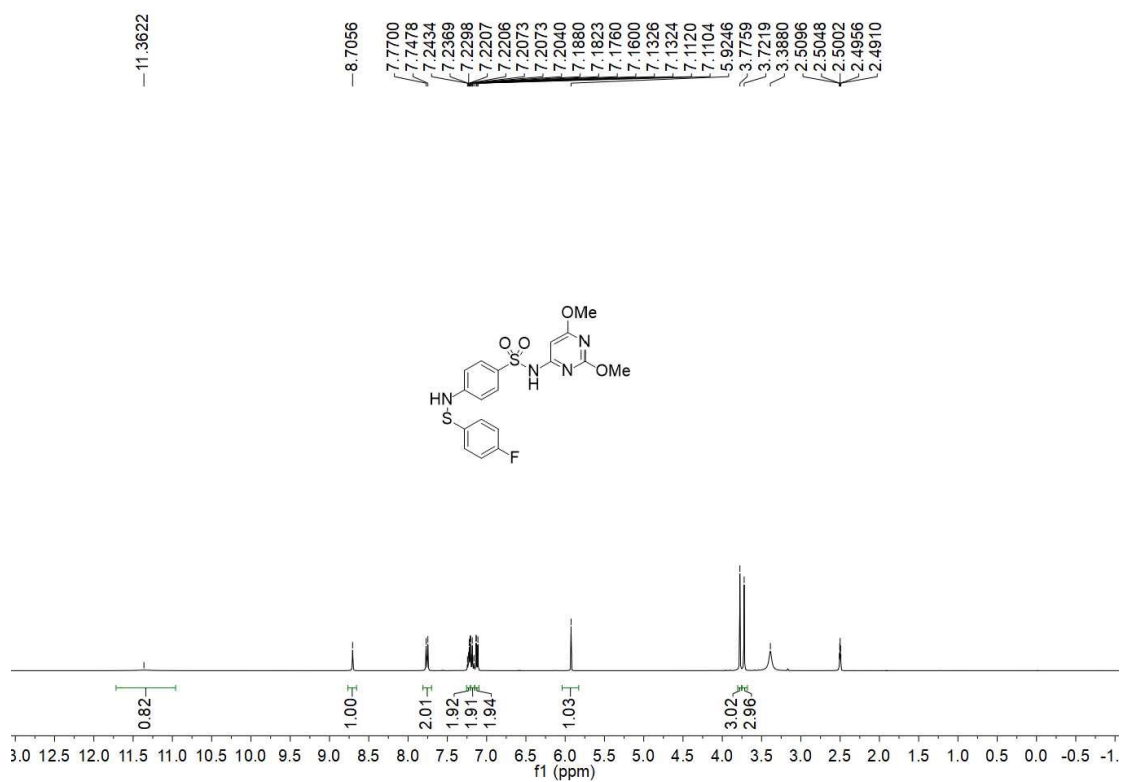

<sup>1</sup>H NMR (400 MHz, DMSO-*d*<sub>6</sub>) spectrum of Compound 5p

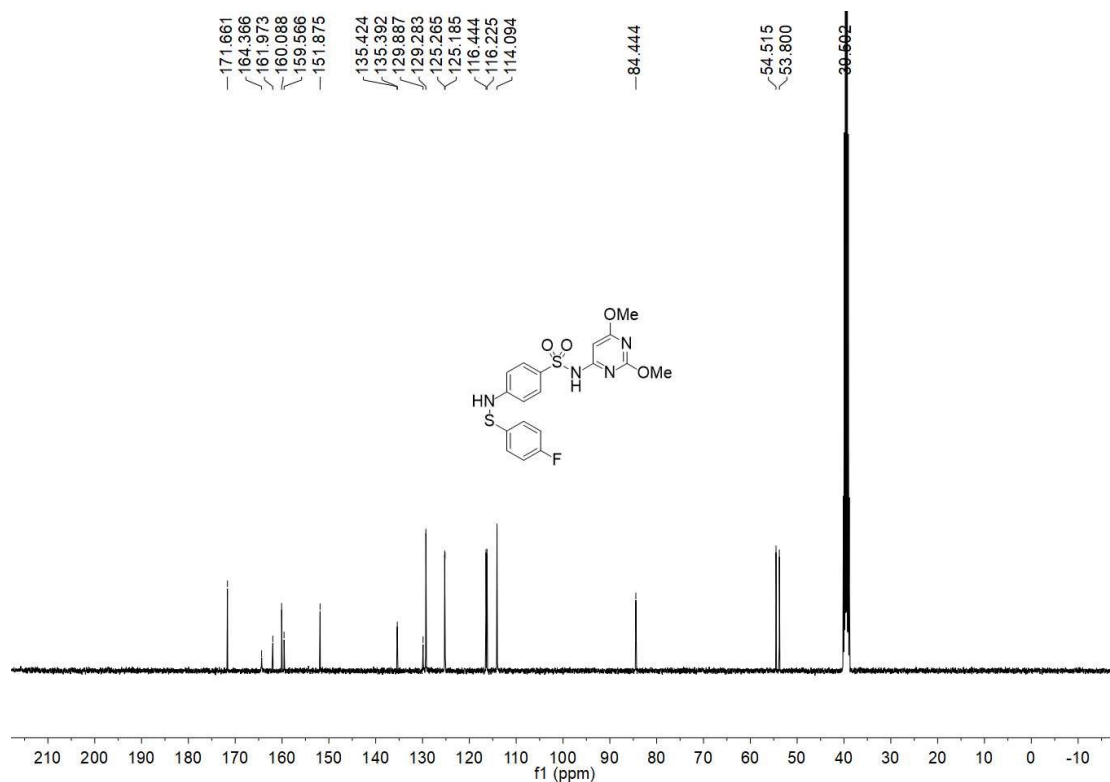

<sup>13</sup>C NMR (101 MHz, DMSO-*d*<sub>6</sub>) spectrum of Compound 5p

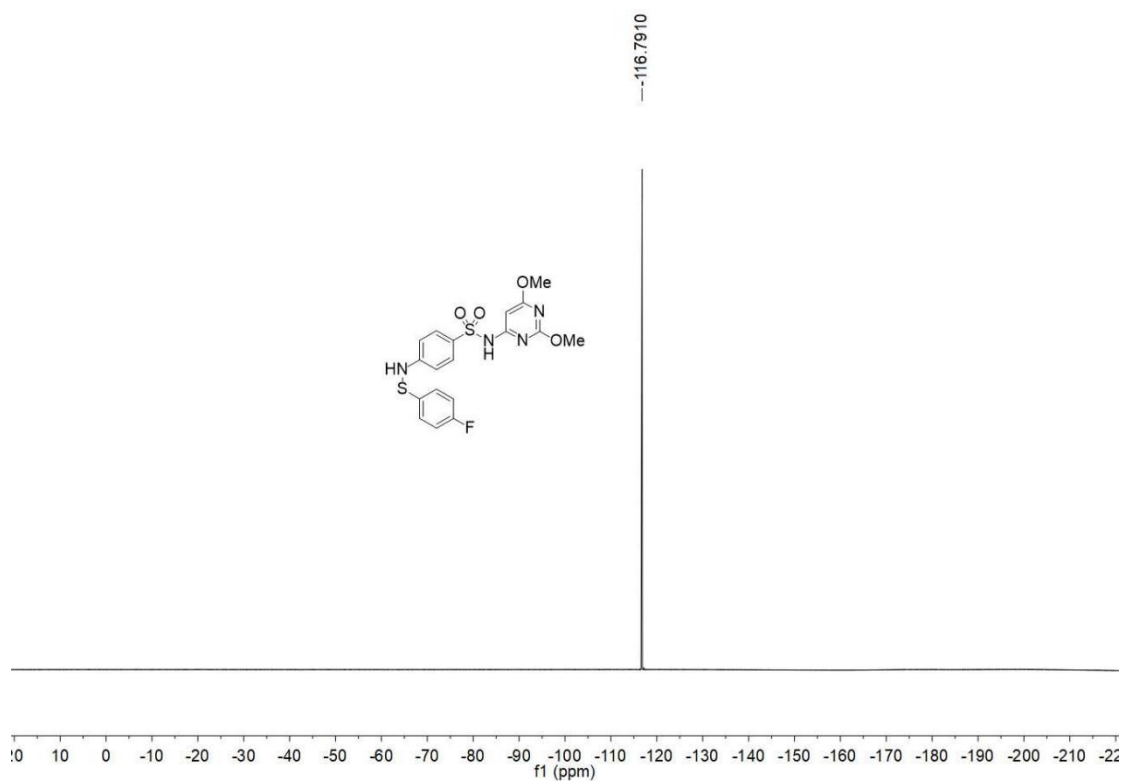

<sup>19</sup>F NMR (376 MHz, DMSO-*d*<sub>6</sub>) spectrum of Compound 5p

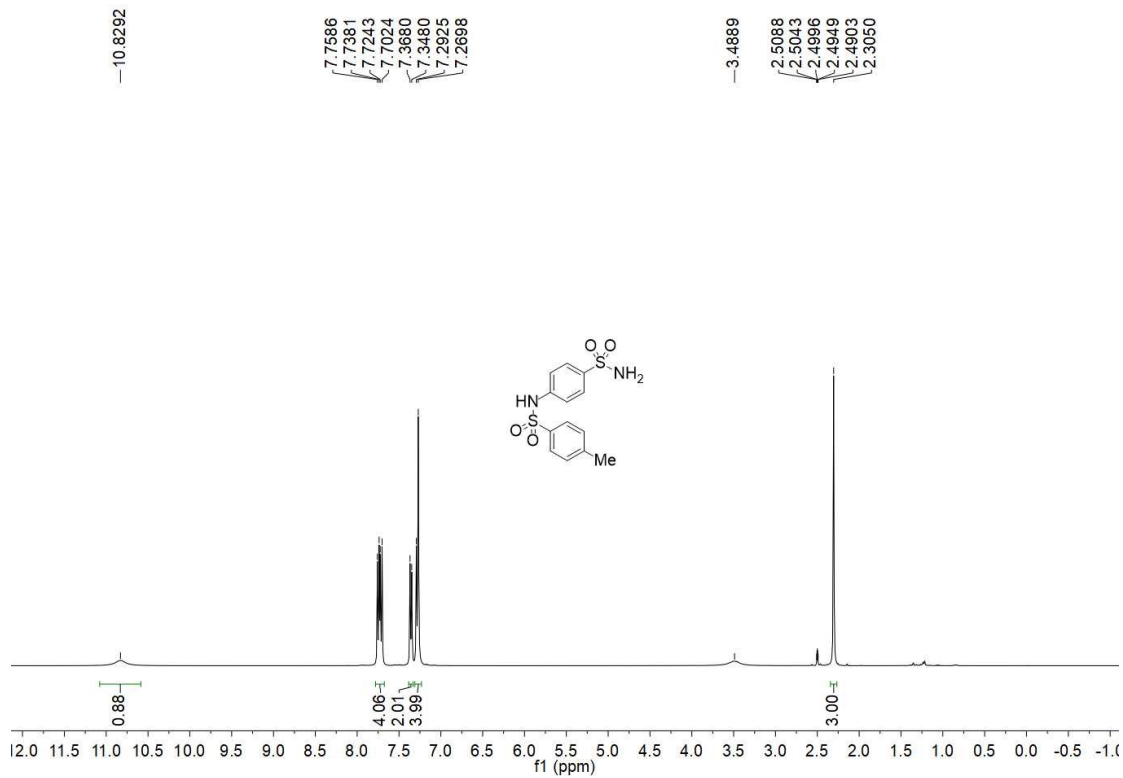

$^1\text{H}$  NMR (400 MHz,  $\text{DMSO-}d_6$ ) spectrum of Compound 6

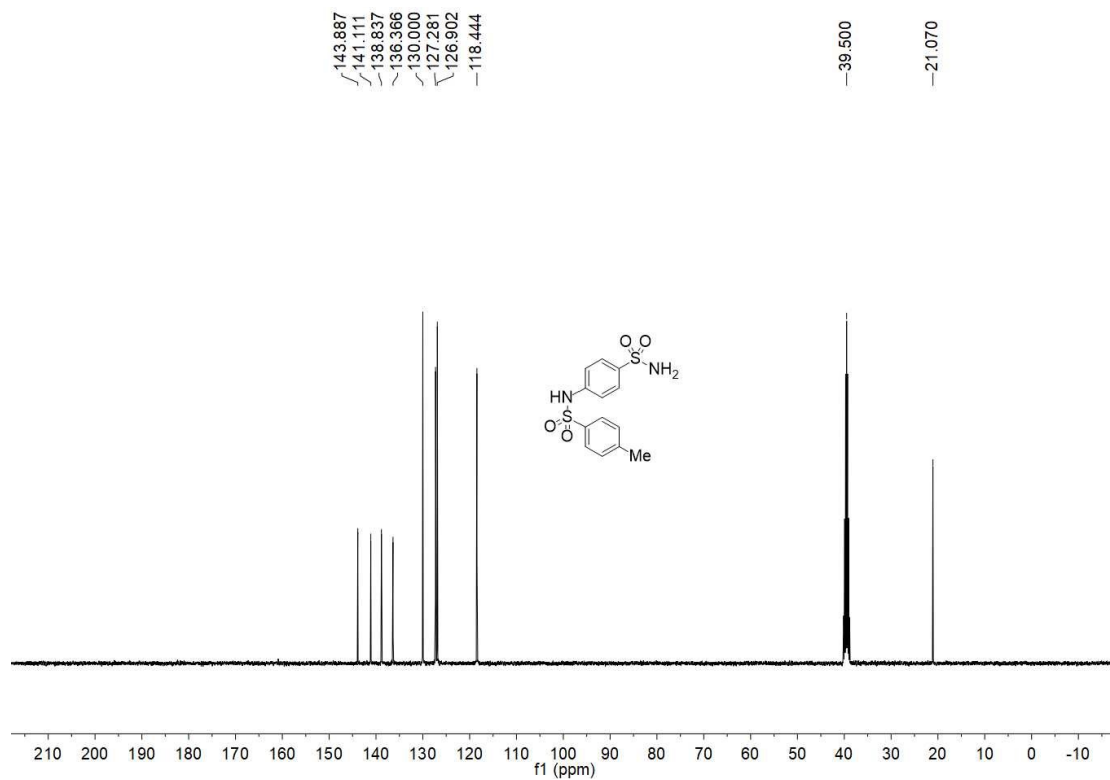

$^{13}\text{C}$  NMR (101MHz,  $\text{DMSO-}d_6$ ) spectrum of Compound 6

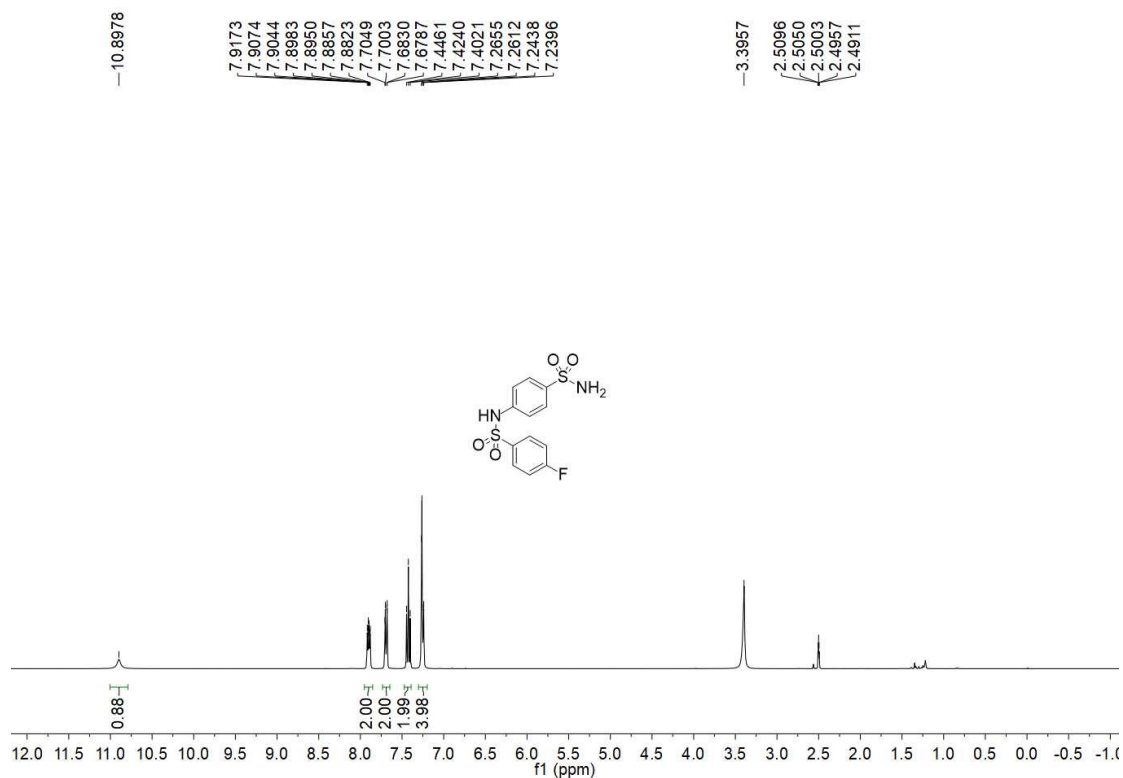

<sup>1</sup>H NMR (400 MHz, DMSO-*d*<sub>6</sub>) spectrum of Compound 7

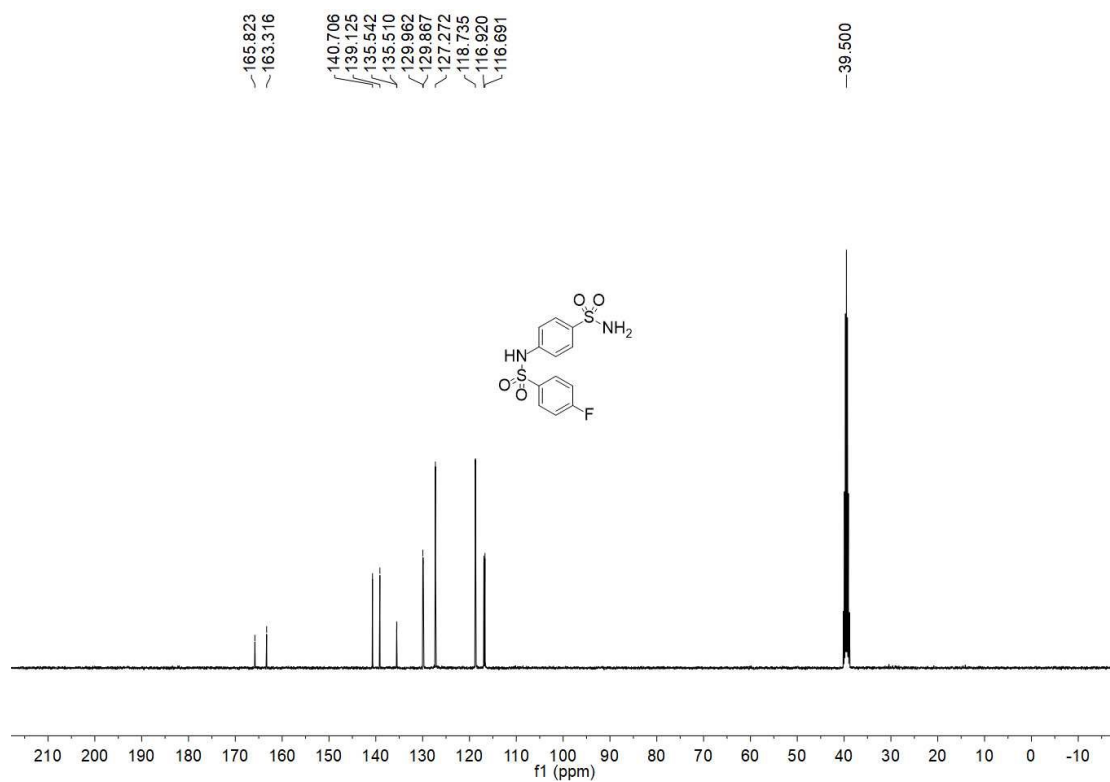

<sup>13</sup>C NMR (101 MHz, DMSO-*d*<sub>6</sub>) spectrum of Compound 7

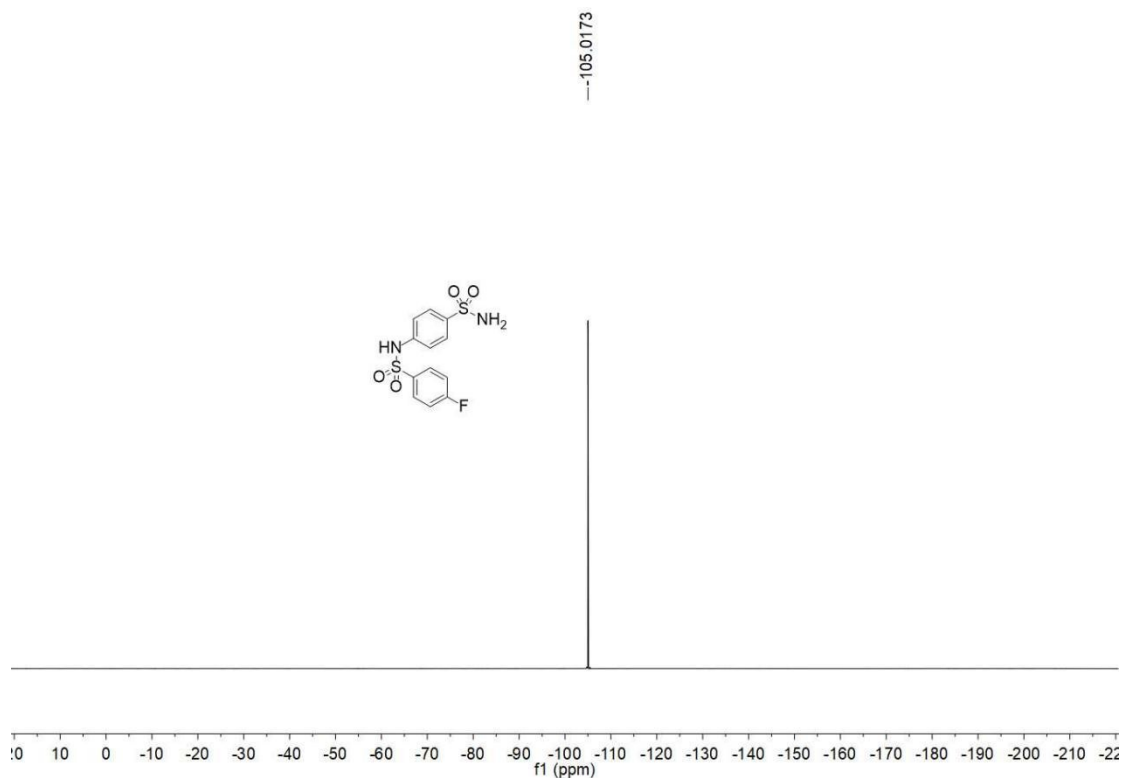

$^{19}\text{F}$  NMR (376 MHz,  $\text{DMSO-}d_6$ ) spectrum of Compound 7

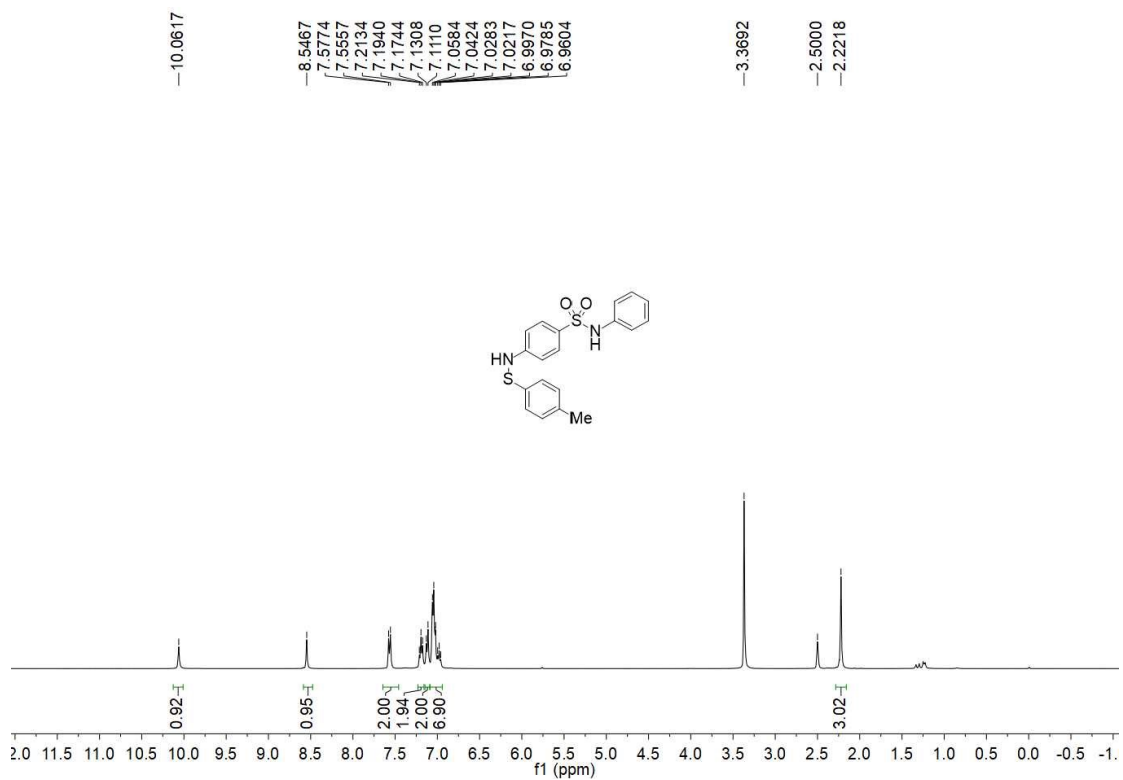

$^1\text{H}$  NMR (400 MHz,  $\text{DMSO-}d_6$ ) spectrum of Compound 8

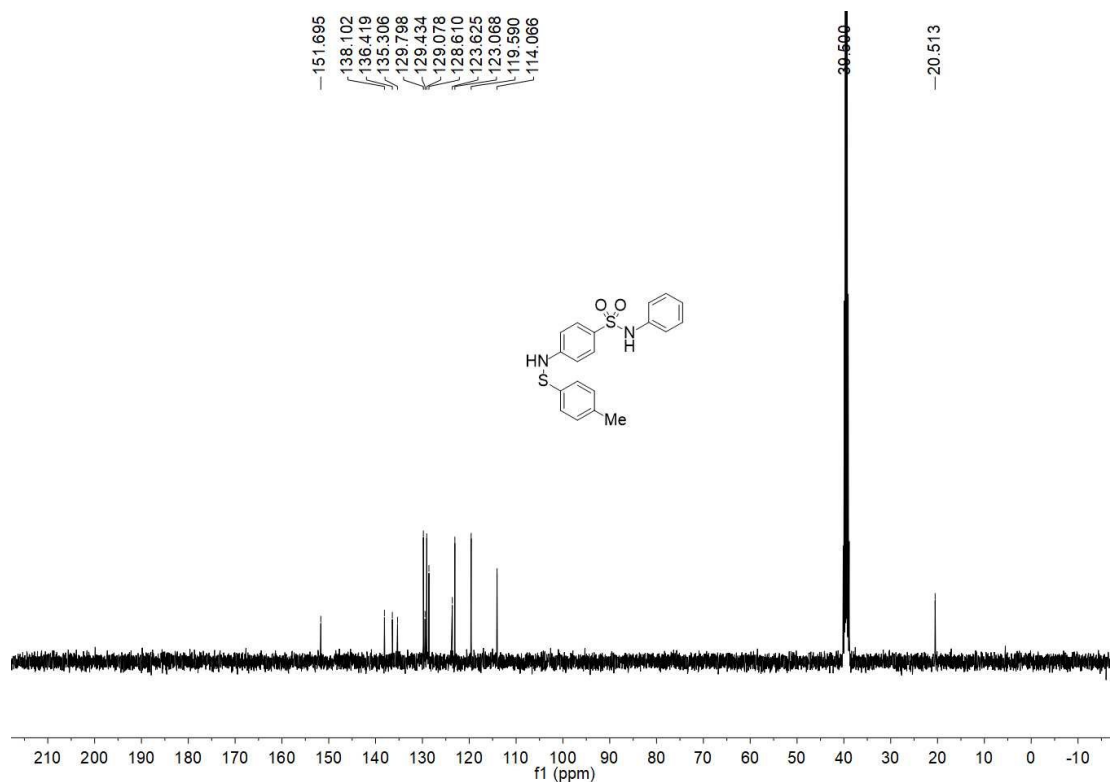

<sup>13</sup>C NMR (101 MHz, DMSO-*d*<sub>6</sub>) spectrum of Compound 8

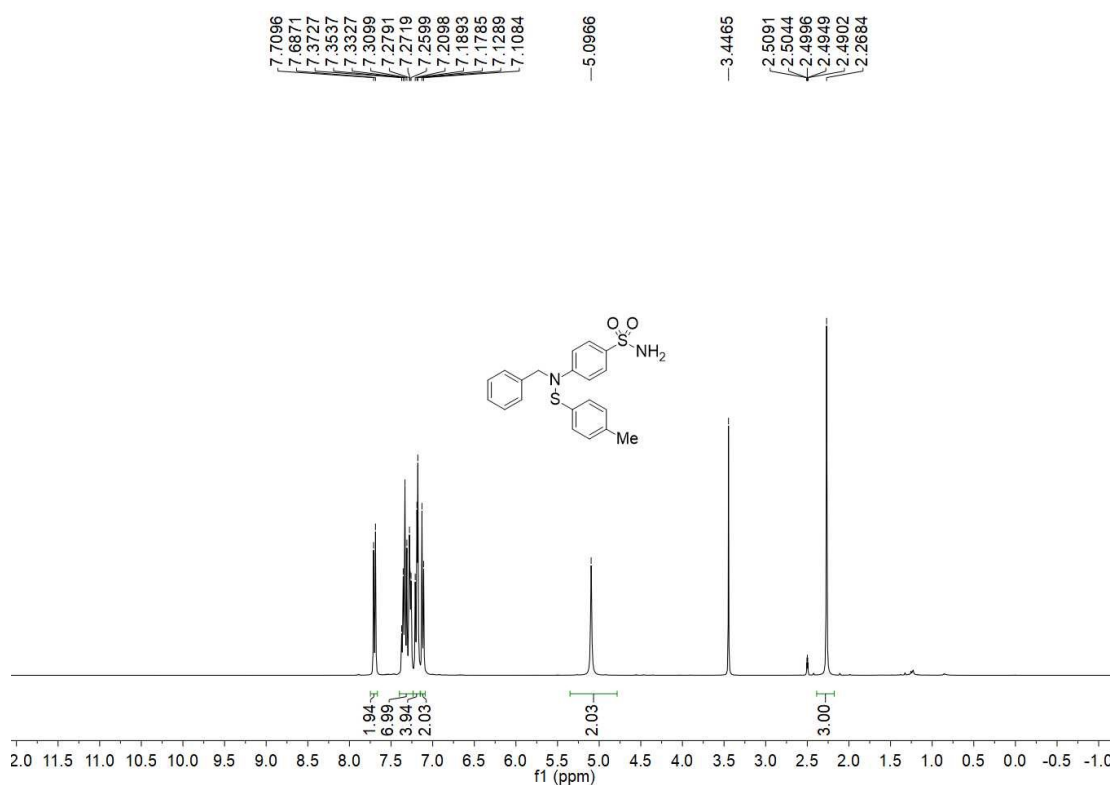

<sup>1</sup>H NMR (400 MHz, DMSO-*d*<sub>6</sub>) spectrum of Compound 9

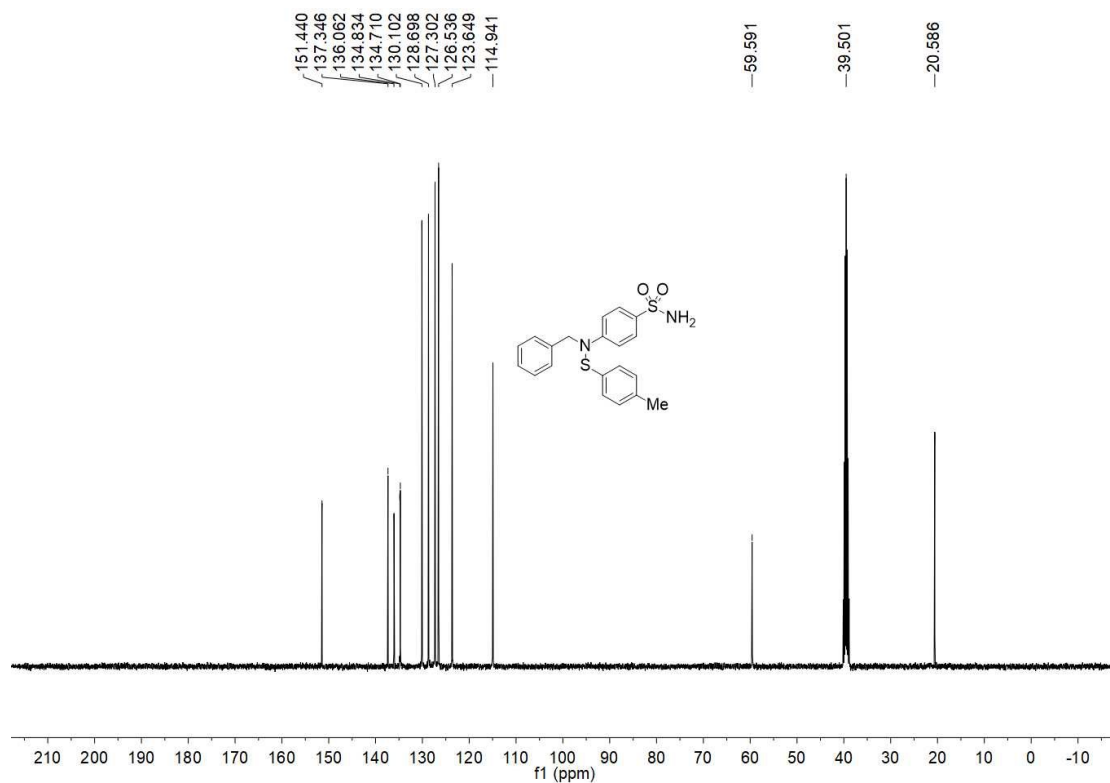

<sup>13</sup>C NMR (101 MHz, DMSO-*d*<sub>6</sub>) spectrum of Compound 9

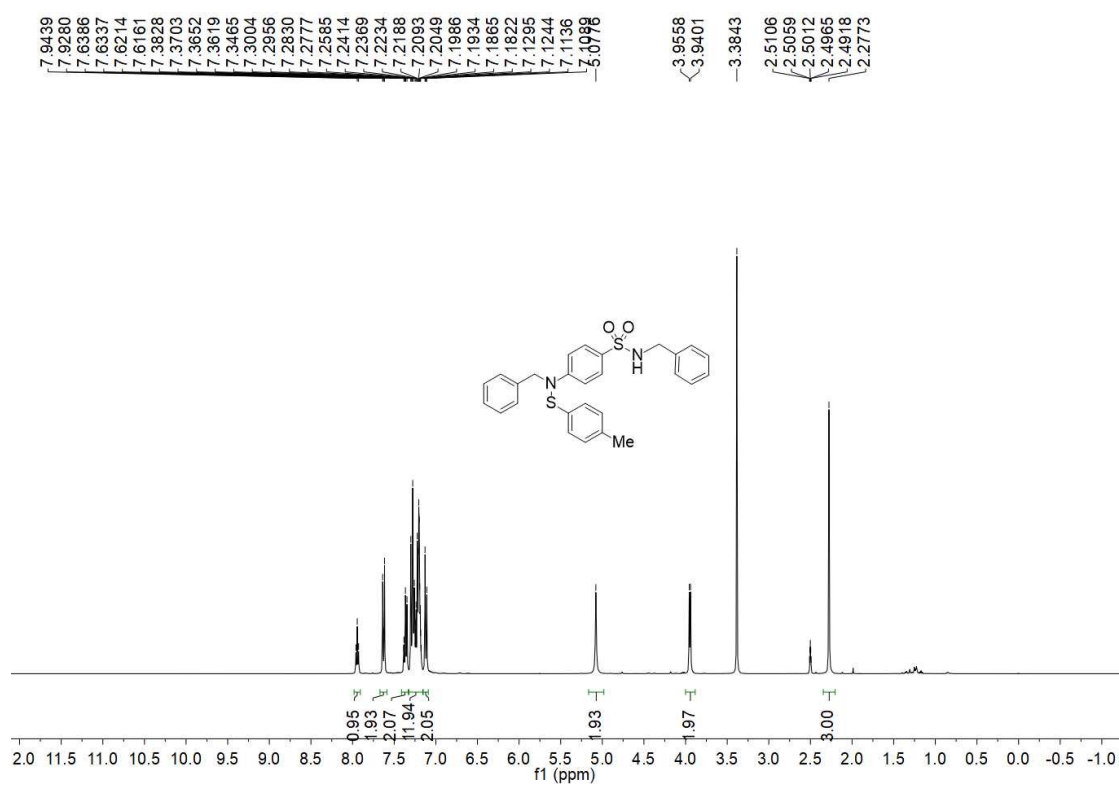

<sup>1</sup>H NMR (400 MHz, DMSO-*d*<sub>6</sub>) spectrum of Compound 9'

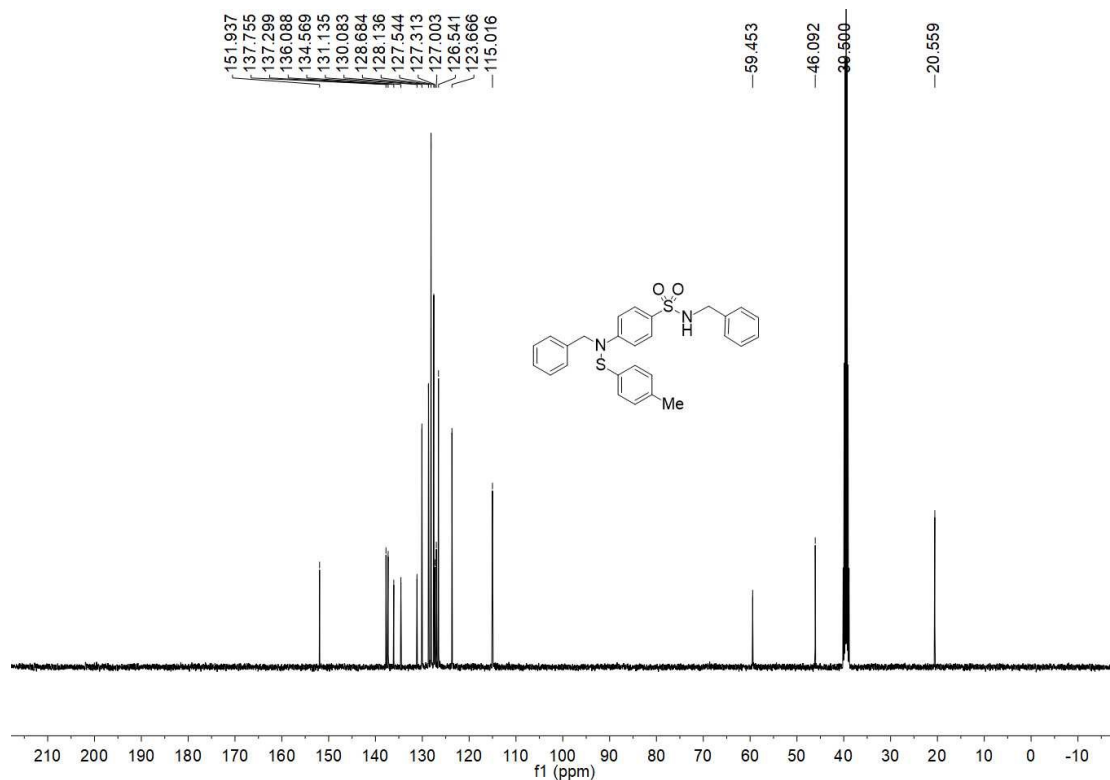

$^{13}\text{C}$  NMR (101 MHz,  $\text{DMSO-}d_6$ ) spectrum of Compound 9'

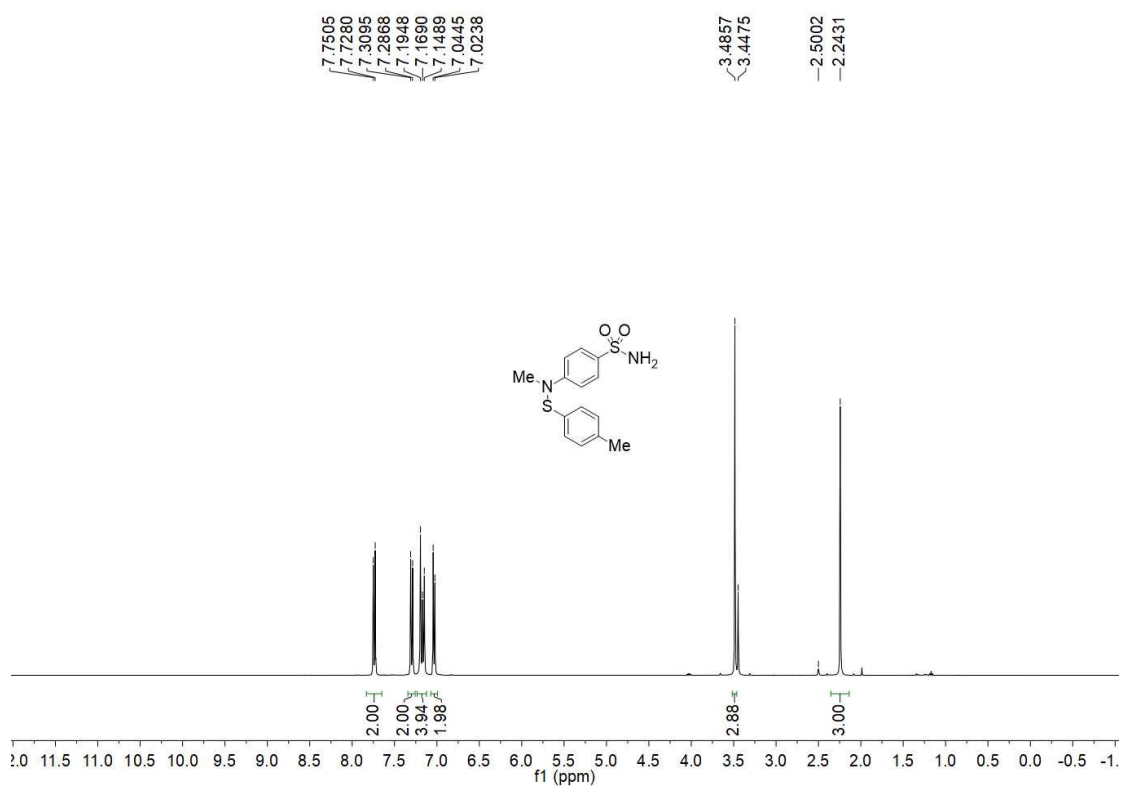

$^1\text{H}$  NMR (400 MHz,  $\text{DMSO-}d_6$ ) spectrum of Compound 10



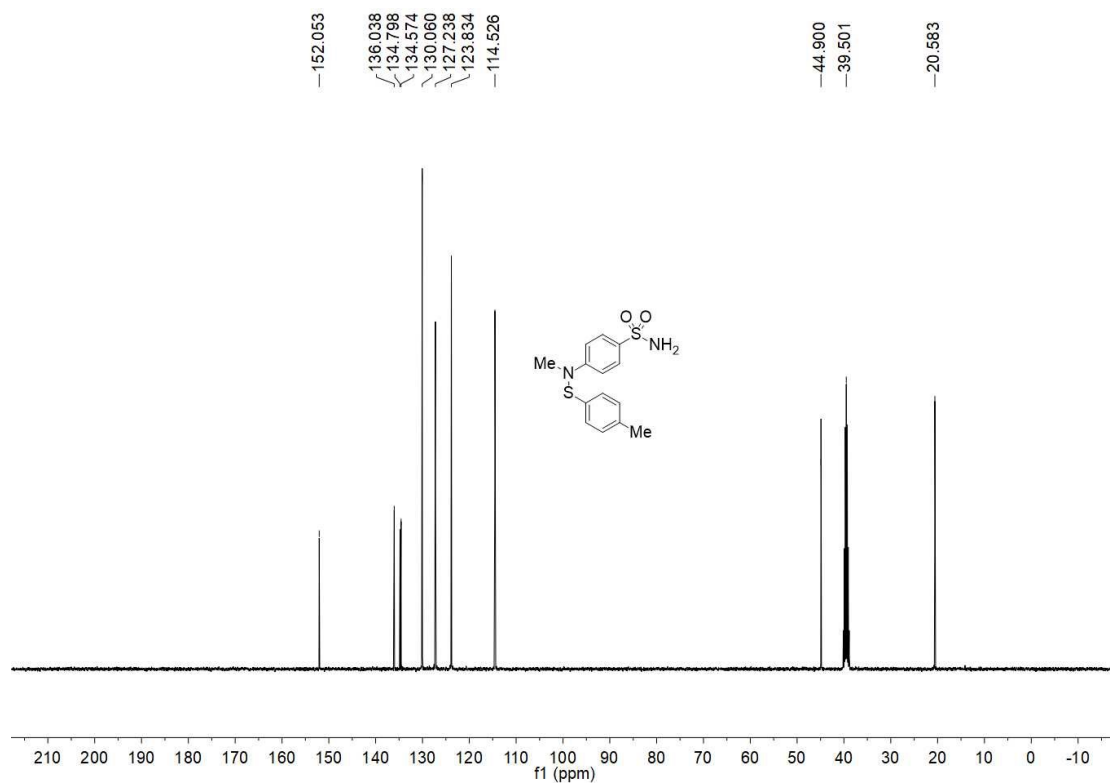

$^{13}\text{C}$  NMR (101 MHz,  $\text{DMSO-}d_6$ ) spectrum of Compound 10

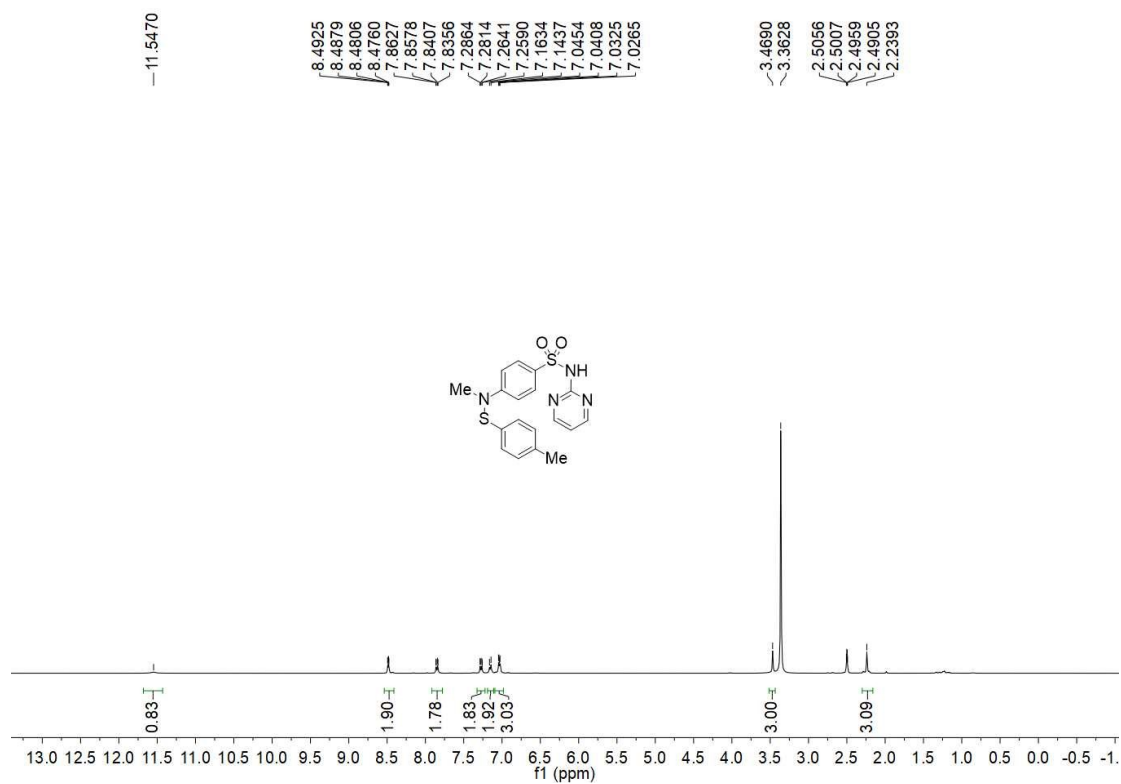

$^1\text{H}$  NMR (400 MHz,  $\text{DMSO-}d_6$ ) spectrum of Compound 11

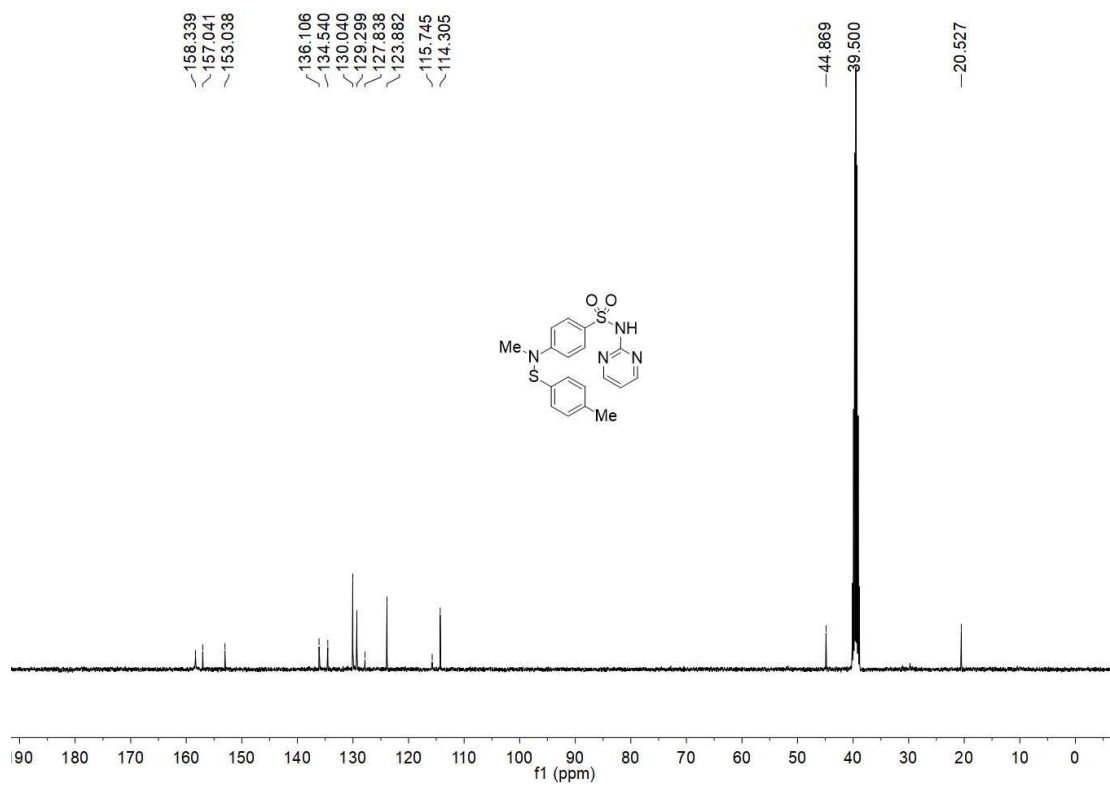

<sup>13</sup>C NMR (101 MHz, DMSO-*d*<sub>6</sub>) spectrum of Compound 11
